# Supplementary material for: Drivers of diurnal and seasonal dynamics of triple oxygen isotopes in atmospheric water vapor and precipitation at a Mediterranean forest site
Source: Copernicus journal article supplement (doi:10.5194/egusphere-2025-5879), 2025-12-05
Supplement: Supplementary file 1 [file S01_CalibrationData.xlsx]

## Sheet: METADATA
	Sheet: VSMOW-SLAP calibration
	This sheet contains raw isotope data of the three working standards (ICE, TAP, NOC) that have been analysed weekly during the study period. ICE and TAP were used for two-point VSMOW-SLAP calibration. NOC standard was used as quality control.
	Variable	Description
	Date	Date of the measurement
	H2O	water mixing ratio measured by the Picarro L2140-i CRDS
	d17O_raw	raw d17O value measured by the Picarro L2140-i CRDS; suffix ICE, TAP and NOC indicate the measured working standard
	d18O_raw	raw d18O value measured by the Picarro L2140-i CRDS; suffix ICE, TAP and NOC indicate the measured working standard
	d2H_raw	raw d2H value measured by the Picarro L2140-i CRDS; suffix ICE, TAP and NOC indicate the measured working standard
	d17O_cal_NOC	VSMOW-SLAP calibrated d17O value of NOC; calibrated based on ICE and TAP data
	d17Oprime_cal_NOC	calculated VSMOW-SLAP calibrated d'17O value of NOC
	d18O_cal_NOC	VSMOW-SLAP calibrated d18O value of NOC; calibrated based on ICE and TAP data
	d18Oprime_cal_NOC	calculated VSMOW-SLAP calibrated d'18O value of NOC
	d2H_cal_NOC	VSMOW-SLAP calibrated d'18O value of NOC; calibrated based on ICE and TAP data
	Exc17_cal_NOC	calculated VSMOW-SLAP calibrated 17O-excess of NOC
	Exc2_cal_NOC	calculated VSMOW-SLAP calibrated d-excess of NOC
	AV	Average over all calibration measurements
	SD	Standard deviation over all calibration measurements
	REF	VSMOW-SLAP calibrated reference values
	Sheet: ICE_MixingRatioDependency
	This sheet contains normalized isotope data (average and standard deviation (SD)) of the working standard ICE used for mixing ratio dependency calibration. The isotope data are expressed as difference relative to the value measured at a water mixing ratio of 10000 ppmv.
	Sheet: TAP_MixingRatioDependency
	This sheet contains normalized isotope data (average and standard deviation (SD)) of the working standard TAP used for mixing ratio dependency calibration. The isotope data are expressed as difference relative to the value measured at a water mixing ratio of 10000 ppmv.
	Sheet: NOC_MixingRatioDependency
	This sheet contains normalized isotope data (average and standard deviation (SD)) of the working standard NOC used for mixing ratio dependency calibration. The isotope data are expressed as difference relative to the value measured at a water mixing ratio of 10000 ppmv.
	Sheet: MixingRatioDependencyFunction
	This sheet contains the coefficients (mean and standard deviation (SD)) of the mixing ratio dependency functions for d17O, d18O and d2H of ICE, TAP and NOC. The mixing ratio dependency function has the form: Y = a/x+bx+c, where x = H2O and Y is d17O, d18O, or d2H.

## Sheet: VSMOW-SLAP calibration
Date	H2O_ICE	d17O_raw_ICE	d18O_raw_ICE	d2H_raw_ICE	H2O_TAP	d17O_raw_TAP	d18O_raw_TAP	d2H_raw_TAP	H2O_NOC	d17O_raw_NOC	d18O_raw_NOC	d2H_raw_NOC	d17O_cal_NOC	d17Oprime_cal_NOC	d18O_cal_NOC	d18Oprime_cal_NOC	d2H_cal_NOC	Exc17_cal_NOC	Exc2_cal_NOC
2020-12-15	11030.7	-14.2084	-27.8215	-200.873	10803.6	-4.4026	-9.3536	-51.0716	11260.6	-8.8596	-17.697	-119.517	-8.94896	-8.98924	-16.8652	-17.0091	-125.274	-8.45006	9.64813
2021-01-05	11349.2	-14.2102	-27.7796	-201.034	11187.4	-4.3776	-9.3052	-51.1498	11238.4	-8.8714	-17.729	-120.519	-8.97325	-9.01375	-16.9416	-17.0867	-126.129	8.05118	9.4041
2021-01-12	11214.8	-14.1844	-27.7178	-200.931	11224.4	-4.3742	-9.2782	-50.9876	11227.6	-8.858	-17.6948	-120.241	-8.97348	-9.01399	-16.9502	-17.0955	-125.99	12.4118	9.61079
2021-01-19	11277.4	-14.1366	-27.628	-200.691	11304.8	-4.3312	-9.2102	-51.0354	11237	-8.8454	-17.6334	-120.258	-9.00573	-9.04653	-16.9665	-17.1121	-126.089	-11.3373	9.64309
2021-01-26	10308.7	-14.2457	-27.8433	-200.174	11153.6	-4.399	-9.3218	-51.4488	NaN	NaN	NaN	NaN	NaN	NaN	NaN	NaN	NaN	NaN	NaN
2021-02-02	11485	-14.2446	-27.8182	-200.684	11284	-4.4362	-9.3538	-51.2138	11301.4	-8.8918	-17.7286	-120.206	-8.94641	-8.98667	-16.8978	-17.0422	-125.949	11.5958	9.2332
2021-02-16	11295.4	-14.2258	-27.7598	-200.654	11337	-4.3758	-9.2704	-50.9028	11369.8	-8.8534	-17.6192	-119.893	-8.94946	-8.98975	-16.861	-17.0048	-125.822	-11.2383	9.0662
2021-02-23	10765.6	-14.2124	-27.756	-200.709	11025.6	-4.4376	-9.339	-51.2616	10933.4	-8.8956	-17.7332	-120.082	-8.96394	-9.00435	-16.9382	-17.0833	-125.793	15.6279	9.71232
2021-03-02	11013	-14.225	-27.7548	-200.566	11059.6	-4.3974	-9.2856	-50.8792	11054.8	-8.94	-17.7738	-119.988	-9.02367	-9.06463	-17.0074	-17.1537	-125.965	-7.471	10.0942
2021-03-10	11210.6	-14.2126	-27.7398	-200.501	11171.4	-4.3868	-9.2924	-51.1122	NaN	NaN	NaN	NaN	NaN	NaN	NaN	NaN	NaN	NaN	NaN
2021-03-17	11075.2	-14.2528	-27.8196	-201.246	11051.4	-4.423	-9.3322	-51.0522	10871.4	-8.907	-17.7424	-120.337	-8.96484	-9.00527	-16.9224	-17.0672	-125.909	6.2047	9.4695
2021-03-23	11020.4	-14.2356	-27.8004	-201.086	11014.6	-4.414	-9.3216	-50.9546	10946.2	-8.8928	-17.7098	-120.25	-8.9634	-9.00381	-16.9045	-17.049	-125.947	-1.91427	9.28965
2021-03-30	11071.8	-14.205	-27.7308	-200.307	10963.6	-4.3888	-9.308	-50.8358	10989	-8.905	-17.7392	-120.107	-9.00279	-9.04356	-16.9722	-17.1178	-126.218	-5.34017	9.55909
2021-04-06	11209	-14.2636	-27.8104	-200.738	11140.8	-4.4448	-9.3304	-51.0524	11207.6	-8.8922	-17.7152	-120.189	-8.93364	-8.97378	-16.9006	-17.0451	-125.992	26.0276	9.21302
2021-04-15	11125	-14.2214	-27.78	-200.791	11144	-4.4012	-9.323	-50.83	11138.8	-8.9004	-17.737	-119.954	-8.98418	-9.02478	-16.9398	-17.0849	-125.857	-3.96927	9.66079
2021-04-20	11181	-14.2154	-27.7542	-200.67	11116	-4.3696	-9.2872	-51.0292	11140.8	-8.8926	-17.708	-120.193	-8.99608	-9.03678	-16.942	-17.0871	-126.039	-14.7834	9.49673
2021-04-27	11273.6	-14.2908	-27.882	-200.484	11298	-4.444	-9.3624	-51.0312	11218.8	-8.9376	-17.7814	-120.147	-8.96666	-9.0071	-16.9166	-17.0613	-126.076	1.28183	9.25687
2021-05-05	11229.6	-14.2602	-27.8206	-200.618	11129.8	-4.4558	-9.3892	-50.7362	11148.4	-8.9484	-17.8174	-120.213	-8.98481	-9.02542	-16.9653	-17.1109	-126.233	9.12129	9.48914
2021-05-12	11325.4	-14.2702	-27.8528	-200.623	11268.8	-4.4202	-9.3396	-50.8088	11346.8	-8.9052	-17.743	-119.936	-8.95675	-8.9971	-16.9041	-17.0486	-125.927	4.57489	9.30637
2021-05-18	NaN	NaN	NaN	NaN	11051.6	-4.4368	-9.3828	-50.9738	11106.4	-8.9122	-17.771	-120.272	NaN	NaN	NaN	NaN	NaN	NaN	NaN
2021-05-26	NaN	NaN	NaN	NaN	11108.5	-4.46117	-9.47083	-51.1005	11156.8	-8.93733	-17.8432	-120.046	NaN	NaN	NaN	NaN	NaN	NaN	NaN
2021-05-29	11078.7	-14.2638	-27.8475	-200.954	11126.2	-4.43392	-9.37658	-50.1598	11105.2	-8.90833	-17.7456	-119.335	-8.95533	-8.99567	-16.8891	-17.0334	-125.539	-2.04448	9.57456
2021-06-02	11173.8	-14.2363	-27.8043	-199.725	11070.2	-4.43933	-9.409	-50.8375	11113.8	-8.92933	-17.768	-119.526	-8.9856	-9.02621	-16.9131	-17.0578	-125.915	-19.6934	9.39001
2021-06-08	11233	-14.233	-27.7683	-199.393	11174.5	-4.4245	-9.36183	-50.8545	11178.8	-8.88583	-17.7128	-119.232	-8.95203	-8.99234	-16.9002	-17.0446	-125.769	7.22749	9.43213
2021-06-15	11141.8	-14.3067	-27.8782	-199.798	11044.3	-4.51783	-9.50967	-51.0987	11166.3	-8.98267	-17.8568	-119.778	-8.96437	-9.00479	-16.9135	-17.0582	-125.991	1.92154	9.31709
2021-06-23	11132.3	-14.3005	-27.8838	-199.888	11144.5	-4.51217	-9.509	-50.9527	11156.8	-8.93733	-17.8247	-119.642	-8.92528	-8.96535	-16.8794	-17.0235	-125.894	23.0616	9.14107
2021-06-29	11180.2	-14.2813	-27.8477	-199.945	11083.8	-4.50783	-9.50033	-51.0375	11160.5	-8.9515	-17.8112	-119.853	-8.9503	-8.99059	-16.887	-17.0312	-126.03	1.87536	9.06565
2021-07-07	11058.5	-14.3087	-27.9158	-200.092	11075.2	-4.53683	-9.53717	-51.0995	11142.7	-8.97783	-17.8703	-119.868	-8.9484	-8.98868	-16.895	-17.0394	-125.946	8.1193	9.21442
2021-07-14	11107.9	-14.313	-27.9197	-200.257	11095.3	-4.526	-9.53167	-51.2352	11178.4	-8.99125	-17.8821	-119.974	-8.96561	-9.00604	-16.9079	-17.0525	-125.904	-2.31617	9.35974
2021-07-24	11177.3	-14.3092	-27.8877	-200.32	11169.7	-4.48017	-9.4635	-50.9553	11158.2	-8.95817	-17.8273	-119.868	-8.95928	-8.99966	-16.905	-17.0495	-125.92	2.47307	9.3201
2021-08-03	11197.3	-14.3005	-27.8703	-199.914	11192.7	-4.5765	-9.56367	-51.4172	11156.3	-9.0055	-17.9113	-120.112	-8.95812	-8.99848	-16.9419	-17.0871	-126.097	23.5043	9.43848
2021-08-10	11224.7	-14.2868	-27.8378	-199.734	11144.8	-4.51983	-9.49083	-50.9758	11092.3	-9.01417	-17.9092	-119.978	-9.00356	-9.04433	-16.9938	-17.1399	-126.278	5.52346	9.67263
2021-08-18	11316.3	-14.2717	-27.8225	-199.718	11311.8	-4.51467	-9.485	-50.8117	11164.3	-8.99083	-17.8415	-119.8	-8.99007	-9.03072	-16.9368	-17.0818	-126.199	-11.5234	9.29535
2021-08-24	11347.7	-14.3035	-27.8495	-199.513	11315	-4.526	-9.5015	-50.9302	11283.2	-9.00733	-17.879	-119.72	-8.98587	-9.02648	-16.9528	-17.0982	-126.151	1.36329	9.47226
2021-09-01	11066.5	-14.291	-27.8705	-200.123	11199.5	-4.54417	-9.50883	-51.0802	11136.3	-9.00317	-17.8625	-119.931	-8.97763	-9.01817	-16.923	-17.0679	-126.003	-6.3426	9.38077
2021-09-08	11186.3	-14.3088	-27.8415	-199.625	11202.2	-4.54617	-9.49183	-50.9313	11188.5	-9.00317	-17.8557	-119.655	-8.96844	-9.0089	-16.9385	-17.0836	-126.037	11.2543	9.47118
2021-09-17	11248.2	-14.3103	-27.8797	-199.671	11323.8	-4.55533	-9.55033	-50.7978	11311	-9.039	-17.9415	-119.771	-8.99844	-9.03917	-16.9749	-17.1206	-126.199	0.514733	9.60058
2021-09-21	11168.3	-14.335	-27.9017	-199.812	11225	-4.557	-9.53733	-51.0087	11166.2	-9.06383	-17.9857	-119.802	-9.01094	-9.05178	-17.0157	-17.1621	-126.055	9.81966	10.0707
2021-09-29	11232.8	-14.3362	-27.866	-199.289	11147.5	-4.5525	-9.50967	-50.499	11129.3	-9.01917	-17.8992	-119.655	-8.96852	-9.00898	-16.961	-17.1065	-126.413	23.2318	9.27479
2021-10-13	11017.7	-14.3347	-27.899	-200.145	11034.8	-4.539	-9.4735	-50.4137	11025	-9.03017	-17.9008	-119.803	-8.98736	-9.02799	-16.9671	-17.1127	-126.217	7.52675	9.52028
2021-10-27	11015.7	-14.3055	-27.872	-199.828	10943.5	-4.5475	-9.49317	-51.0353	10937.7	-9.02883	-17.9015	-119.82	-8.99475	-9.03545	-16.9694	-17.1151	-126.051	1.31457	9.70438
2021-11-09	11071.2	-14.0743	-27.7685	-200.001	11087.6	-4.2798	-9.3476	-50.7584	11047.3	-8.738	-17.702	-119.736	-8.95522	-8.99556	-16.8971	-17.0415	-126.036	2.34664	9.14054
2021-11-16	11064.2	-14.0755	-27.7753	-200.255	10946.5	-4.29467	-9.3995	-50.8585	10998.7	-8.80117	-17.7982	-119.838	-9.00931	-9.05014	-16.9612	-17.1067	-125.97	-17.7927	9.72002
2021-11-26	11202.7	-14.119	-27.8193	-200.338	11225.5	-4.30517	-9.402	-50.7508	11369.7	-8.79733	-17.7875	-119.699	-8.98011	-9.02068	-16.9295	-17.0744	-125.855	-5.39557	9.58067
2021-11-30	11185	-14.0732	-27.7548	-200.126	11138.7	-4.2985	-9.3685	-50.6047	11478.2	-8.78717	-17.7902	-119.691	-8.99443	-9.03513	-16.9793	-17.1251	-126.017	6.90348	9.8169
2021-12-09	11139.3	-14.0938	-27.8043	-200.566	11082.2	-4.27017	-9.34467	-50.923	11246	-8.7725	-17.7668	-119.909	-8.98571	-9.02632	-16.9466	-17.0918	-125.866	-1.82585	9.70728
2021-12-15	11011.7	-14.08	-27.77	-200.68	11112.3	-4.26	-9.34	-50.84	11064.5	-8.76	-17.74	-120.16	-8.98506	-9.02567	-16.9381	-17.0832	-126.101	-5.75573	9.40402
2021-12-21	10934.5	-14.0857	-27.8158	-200.622	10851.7	-4.28567	-9.3585	-51.1233	10786.8	-8.77567	-17.7647	-120.19	-8.98424	-9.02484	-16.9319	-17.0769	-126.008	-8.25547	9.44661
2022-01-05	11269	-14.1412	-27.876	-200.136	11417.5	-4.34033	-9.43567	-50.7828	11363.5	-8.8015	-17.8278	-119.793	-8.95532	-8.99566	-16.9257	-17.0706	-126.019	17.604	9.38633
AV	11141.4	-14.234	-27.8195	-200.295	11137.2	-4.43407	-9.40119	-50.9437	11153.2	-8.91504	-17.7932	-119.925	-8.97416	-9.01467	-16.9327	-17.0777	-125.993	2.33407	9.46826
SD	176.043	0.0780624	0.0599966	0.483832	123.647	0.0886247	0.0911286	0.228028	136.22	0.0827781	0.081461	0.266207	0.0219257	0.0221243	0.0357249	0.0363404	0.187295	10.9503	0.229077
REF	–	-14.2404	-26.8485	-203.76	–	-4.53973	-8.63819	-59.2434	–				-8.96193	-9.00233	-16.9109	-17.0555	-125.694	2.96337	9.59315

## Sheet: ICE_MixingRatioDependency
sequence	STD	d17O	d17Oprime	d18O	d18Oprime	d2H	Exc17	Exc2	H2O	d17OSD	d18OSD	d2HSD	Exc17SD	Exc2SD	H2OSD
2021-05-26	ICE	-0.00507259	-0.0050726	0.124751	0.124743	-0.533509	-70.9371	-1.53152	30073.7	0.0129636	0.018974	0.152971	2.84745	0.304763	134.822
2021-05-26	ICE	-0.00913047	-0.00913051	0.0888342	0.0888302	-0.468759	-56.0329	-1.17943	26212	0.00754247	0.00188562	0.0524438	6.62754	0.0675287	379.716
2021-05-26	ICE	-0.00422719	-0.0042272	0.0584033	0.0584016	-0.339259	-35.0632	-0.806486	21888.2	0.0124922	0.00954594	0.0328805	7.48901	0.0434871	127.161
2021-05-26	ICE	-0.0311107	-0.0311111	-0.00485873	-0.00485875	-0.440343	-28.5457	-0.401473	17040.1	0.013435	0.0144957	0.053033	5.75705	0.168999	3.41768
2021-05-26	ICE	-0.0119203	-0.0119203	0.00371335	0.00371335	-0.309593	-13.881	-0.3393	14114.4	0.0168527	0.01426	0.0771925	9.35161	0.191272	44.9013
2021-05-26	ICE	0.000168844	0.000168844	0.00499917	0.00499915	-0.137009	-2.47071	-0.177003	11078.7	0.0117851	0.0141421	0.0148492	4.2751	0.127986	29.2271
2021-05-26	ICE	-0.000253852	-0.000253852	-0.00751608	-0.00751611	0.205991	3.71465	0.266119	8378.25	0.010253	0.0358267	0.0923953	9.0572	0.379009	4.12479
2021-05-26	ICE	0.0446365	0.0446355	0.00577065	0.00577064	0.461074	41.5886	0.414909	6848.42	0.0113137	0.00954594	0.0729498	6.29223	0.149317	28.1664
2021-05-26	ICE	0.0713509	0.0713483	0.0386017	0.038601	0.990824	50.967	0.68201	5308.08	0.00471405	0.00235702	0.053033	6.06168	0.0718892	20.8597
2021-05-26	ICE	0.1274	0.127392	0.062175	0.062173	1.75266	94.5649	1.25526	3815.08	0.0130815	0.0194454	0.026163	2.70847	0.129401	16.1456
2021-05-26	ICE	0.393868	0.39379	0.357398	0.357334	3.67099	205.118	0.81181	2159.5	0.0272236	0.0328805	0.00424264	9.75545	0.258801	11.078
2021-10-20	ICE	0.00843138	0.00843135	0.12146	0.121452	-0.353209	-55.6954	-1.32489	29597.8	0.00718892	0.0392444	0.0465512	14.0181	0.360507	46.669
2021-10-20	ICE	0.0108831	0.010883	0.0828004	0.0827969	-0.353126	-32.8338	-1.01553	25329.2	0.00494975	0	0.0919239	5.02134	0.0919239	103.827
2021-10-20	ICE	0.00902317	0.00902313	0.065828	0.0658258	-0.320542	-25.7329	-0.847166	21161.5	0.000942809	0.00565685	0.10312	4.02897	0.0578649	128.929
2021-10-20	ICE	-0.0116894	-0.0116895	0.0308547	0.0308542	-0.301709	-27.9805	-0.548546	16818.9	0.0109602	0.00801388	0.0177955	6.76695	0.0463155	124.097
2021-10-20	ICE	0.00893863	0.00893859	0.0336834	0.0336828	-0.335042	-8.84594	-0.604509	13905	0.000117851	0.00978164	0.21225	5.43172	0.290503	158.863
2021-10-20	ICE	-0.00788509	-0.00788512	-0.000775632	-0.000775633	-0.0687922	-7.47559	-0.0625872	10929.3	0.00329983	0.0218025	0.0513831	8.49341	0.225803	95.9308
2021-10-20	ICE	0.014772	0.0147719	0.00145306	0.00145306	0.128874	14.0047	0.11725	8259	0.00471405	0.00954594	0.25503	0.402232	0.331397	78.4889
2021-10-20	ICE	0.0439387	0.0439378	0.0415695	0.0415687	0.415374	21.9895	0.0828181	6752.33	0.00624611	0.00954594	0.229338	1.15199	0.305706	46.669
2021-10-20	ICE	0.0510402	0.0510389	0.0508272	0.0508259	0.890458	24.2028	0.48384	5163	0.005539	0.0182669	0.0418372	15.5393	0.104298	19.3276
2021-10-20	ICE	0.105823	0.105817	0.0945439	0.0945394	1.46321	55.9006	0.706857	3683.25	0.0305234	0.0401872	0.0379481	9.13873	0.359446	13.3172
2021-10-20	ICE	0.354797	0.354734	0.406304	0.406221	3.53529	140.249	0.284861	2015	0.00259272	0.00989949	0.089449	2.74492	0.010253	8.01388
2022-01-05	ICE	0.0179607	0.0179606	0.126692	0.126684	-0.25202	-48.9288	-1.26556	29951.8	0.0100173	0.00282843	0.164284	8.62466	0.141657	6.12826
2022-01-05	ICE	-0.00596009	-0.0059601	0.0830625	0.083059	-0.31502	-49.8153	-0.97952	25774.2	0.00235702	0.0130815	0.0612826	4.71288	0.165934	24.0416
2022-01-05	ICE	-0.0043541	-0.0043541	0.0518615	0.0518602	-0.28727	-31.7363	-0.702162	21405.2	0.0111959	0.00106066	0.0887419	10.7801	0.0802566	75.3069
2022-01-05	ICE	-0.0156806	-0.0156807	0.0115745	0.0115744	-0.249354	-21.792	-0.34195	16966.3	0.0140243	0.0354732	0.113373	5.04021	0.397158	122.094
2022-01-05	ICE	-0.0121305	-0.0121305	0.00823153	0.0082315	-0.14902	-16.4768	-0.214873	13912.2	0.0050676	0.0139064	0.0714178	2.41256	0.182669	125.04
2022-01-05	ICE	-0.0027481	-0.00274811	-0.00376885	-0.00376886	-0.0175204	-0.75815	0.0126304	10811.7	0.0143778	0.0292271	0.0447834	1.28978	0.2786	120.208
2022-01-05	ICE	0.00612711	0.00612709	0.00840297	0.00840293	0.0390629	1.69035	-0.0281608	8190.33	0.0161456	0.0235702	0.0656431	3.57555	0.254205	124.922
2022-01-05	ICE	0.0511794	0.0511781	0.0282036	0.0282032	0.26948	36.2868	0.0438508	6549.17	0.00164992	0.00766032	0.0315841	5.83313	0.0928667	61.9897
2022-01-05	ICE	0.108319	0.108313	0.0892341	0.0892301	0.564813	61.1995	-0.14906	4880.75	0.022156	0.038773	0.0374767	1.4144	0.272708	6.24611
2022-01-05	ICE	0.194282	0.194263	0.225181	0.225156	1.32265	75.3805	-0.478804	3356.25	0.0130815	0.0159099	0.0634039	21.9049	0.0638753	10.4888
2022-01-05	ICE	0.547262	0.547112	0.621708	0.621515	2.76965	218.952	-2.20402	1961.33	0.0651717	0.0559793	0.103002	35.6834	0.344832	27.5772

## Sheet: TAP_MixingRatioDependency
sequence	STD	d17O	d17Oprime	d18O	d18Oprime	d2H	Exc17	Exc2	H2O	d17OSD	d18OSD	d2HSD	Exc17SD	Exc2SD	H2OSD
2021-05-26	TAP	0.0699188	0.0699163	0.24625	0.24622	0.333338	-60.0878	-1.63666	30046.8	0.00848528	0.0249844	0.000235702	4.7906	0.19964	48.6725
2021-05-26	TAP	0.0530941	0.0530927	0.185261	0.185244	0.215505	-44.716	-1.26658	26172.7	0.0053033	0.00954594	0.00329983	10.4136	0.0730677	296.749
2021-05-26	TAP	0.0247182	0.0247179	0.126038	0.12603	0.121088	-41.8262	-0.887219	22042.3	0.0127279	0.0493796	0.049851	13.532	0.444888	215.903
2021-05-26	TAP	0.0393666	0.0393658	0.0976889	0.0976842	0.0843383	-12.2115	-0.697173	17059.5	0.0177955	0.0367696	0.0226274	1.72237	0.316784	68.5894
2021-05-26	TAP	0.0248856	0.0248853	0.0499071	0.0499058	0.119255	-1.46493	-0.280001	14150	0.0148492	0.0360624	0.0590434	4.30552	0.347543	6.83537
2021-05-26	TAP	0.00303871	0.0030387	0.0109581	0.010958	-0.011745	-2.74714	-0.0994097	11126.2	0.0196811	0.0383016	0.156624	0.646276	0.149789	48.0833
2021-05-26	TAP	-0.00407619	-0.0040762	-0.0146994	-0.0146995	0.015755	3.68516	0.133351	8489.33	0.00565685	0.0167349	0.0262808	3.23778	0.16016	25.6915
2021-05-26	TAP	0.0288198	0.0288193	-0.0194103	-0.0194105	0.0864217	39.0681	0.241704	6934.58	0.0248666	0.0325269	0.0269879	7.64026	0.287203	94.1631
2021-05-26	TAP	0.0326702	0.0326696	-0.0242053	-0.0242056	0.291005	45.4502	0.484648	5303.67	0.00577471	0.0194454	0.137886	16.1647	0.293449	28.7557
2021-05-26	TAP	0.0451422	0.0451412	-0.0835121	-0.0835156	0.155255	89.2374	0.823352	3774.17	0.00872098	0.0228631	0.053858	20.947	0.236763	31.5841
2021-05-26	TAP	0.164505	0.164492	-0.00351107	-0.00351108	0.744838	166.345	0.772927	2180.42	0.0742462	0.0496153	0.225803	48.1197	0.622725	4.8319
2021-10-20	TAP	0.062033	0.0620311	0.213578	0.213555	0.359704	-50.7258	-1.34892	29849.7	0.00471405	0.00730677	0.341061	0.841807	0.282607	28.9914
2021-10-20	TAP	0.0267083	0.0267079	0.170338	0.170323	0.304871	-63.2228	-1.05783	25577.2	0.00612826	0.00919239	0.38938	1.25683	0.315841	23.8059
2021-10-20	TAP	0.0397667	0.0397659	0.138455	0.138445	0.197704	-33.3333	-0.909936	21349.7	0.013435	0.00388909	0.342711	11.4224	0.373824	127.515
2021-10-20	TAP	0.0338235	0.0338229	0.103123	0.103118	0.180121	-20.6233	-0.644863	17060.2	0.00176777	0.0050676	0.223328	0.925268	0.182787	64.111
2021-10-20	TAP	0.00963188	0.00963184	0.0567708	0.0567692	0.125704	-20.3423	-0.328462	14116.4	0.0193276	0.019799	0.273886	8.8622	0.115494	67.293
2021-10-20	TAP	0.00745548	0.00745545	0.0210182	0.021018	0.0675377	-3.64205	-0.100608	11051.8	0.0249844	0.0293449	0.181726	9.45544	0.053033	16.3813
2021-10-20	TAP	-0.011881	-0.0118811	-0.033494	-0.0334946	-0.107629	5.80402	0.160323	8323.92	0.0173241	0.0375945	0.180077	2.63703	0.12068	54.3294
2021-10-20	TAP	-0.0394209	-0.0394217	-0.0512441	-0.0512454	-0.267046	-12.3641	0.142907	6848.5	0.00494975	0.0398337	0.157803	16.2599	0.160867	0.707107
2021-10-20	TAP	-0.0306316	-0.0306321	-0.0853984	-0.085402	-0.223379	14.4602	0.459808	5263.58	0.030052	0.0388909	0.0665859	9.45769	0.244541	47.494
2021-10-20	TAP	-0.0264462	-0.0264466	-0.135873	-0.135882	-0.224129	45.2991	0.862852	3734.58	0.0168527	0.0344125	0.0318198	1.41596	0.30712	2.71058
2021-10-20	TAP	0.021351	0.0213508	-0.166241	-0.166255	-0.146296	109.133	1.18363	2063.75	0.00989949	0.0048319	0.118087	12.5187	0.156742	2.94628
2022-01-05	TAP	0.035102	0.0351014	0.171472	0.171457	0.376689	-55.4279	-0.995084	29597.8	0.00718892	0.0392444	0.0465512	14.0181	0.360507	46.669
2022-01-05	TAP	0.0301365	0.030136	0.135078	0.135069	0.348911	-41.1805	-0.731714	25329.2	0.00494975	0	0.0919239	5.02134	0.0919239	103.827
2022-01-05	TAP	0.0091026	0.00910256	0.0915631	0.0915589	0.2693	-39.2405	-0.463204	21161.5	0.000942809	0.00565685	0.10312	4.02897	0.0578649	128.929
2022-01-05	TAP	0.014905	0.0149049	0.0671138	0.0671116	0.112245	-20.53	-0.424666	16818.9	0.0109602	0.00801388	0.0177955	6.76695	0.0463155	124.097
2022-01-05	TAP	0.00748461	0.00748458	0.0387393	0.0387385	0.0728559	-12.9694	-0.237058	13905	0.000117851	0.00978164	0.21225	5.43172	0.290503	158.863
2022-01-05	TAP	0.000454722	0.000454722	0.0116544	0.0116544	0.0486337	-5.69879	-0.0446019	10929.3	0.00329983	0.0218025	0.0513831	8.49341	0.225803	95.9308
2022-01-05	TAP	-0.000772718	-0.000772718	-0.0198043	-0.0198045	-0.0826441	9.68406	0.0757904	8259	0.00471405	0.00954594	0.25503	0.402232	0.331397	78.4889
2022-01-05	TAP	0.0142355	0.0142354	-0.029113	-0.0291134	-0.136144	29.6073	0.0967596	6752.33	0.00624611	0.00954594	0.229338	1.15199	0.305706	46.669
2022-01-05	TAP	0.0184758	0.0184756	-0.0344402	-0.0344408	-0.183033	36.6604	0.0924887	5163	0.005539	0.0182669	0.0418372	15.5393	0.104298	19.3276
2022-01-05	TAP	0.0761097	0.0761068	-0.00135524	-0.00135524	-0.192589	76.8224	-0.181747	3683.25	0.0305234	0.0401872	0.0379481	9.13873	0.359446	13.3172
2022-01-05	TAP	0.219497	0.219473	0.137321	0.137312	0.186967	146.972	-0.911603	2015	0.00259272	0.00989949	0.089449	2.74492	0.010253	8.01388

## Sheet: NOC_MixingRatioDependency
sequence	STD	d17O	d17Oprime	d18O	d18Oprime	d2H	Exc17	Exc2	H2O	d17OSD	d18OSD	d2HSD	Exc17SD	Exc2SD	H2OSD
2021-05-26	NOC	0.0104747	0.0104747	0.154225	0.154214	-0.214817	-70.9501	-1.44862	30048.9	0.0232167	0.0394801	0.080728	2.20609	0.396569	0.353553
2021-05-26	NOC	-3.54921e-05	-3.54921e-05	0.107309	0.107303	-0.127401	-56.6916	-0.985873	26362.6	0.0120208	0.0148492	0.00683537	4.14748	0.125629	6.48181
2021-05-26	NOC	-0.00112856	-0.00112856	0.0912743	0.0912702	-0.212401	-49.3192	-0.942596	22114.2	0.0159099	0.0152028	0.0601041	7.88187	0.181726	21.8025
2021-05-26	NOC	-0.040563	-0.0405638	0.0183122	0.018312	-0.187234	-50.2325	-0.333732	17097.1	0.00235702	0.00106066	0.0718892	1.80838	0.0634039	2.23917
2021-05-26	NOC	-0.0196266	-0.0196268	0.0117795	0.0117795	-0.201151	-25.8463	-0.295387	14154.2	0.0104888	0.00353553	0.0955773	8.68252	0.067293	6.59966
2021-05-26	NOC	-0.0055849	-0.00558491	0.0103372	0.0103372	-0.210901	-11.0429	-0.293599	11105.2	0.0153206	0.0152028	0.0172063	7.28625	0.138829	16.2635
2021-05-26	NOC	0.00761596	0.00761593	-0.0140966	-0.0140967	0.287599	15.059	0.400372	8492.92	0.00718892	0.0458441	0.631682	17.3908	0.998435	113.726
2021-05-26	NOC	0.038474	0.0384733	0.0194999	0.0194997	0.263016	28.1774	0.107016	6899.75	0.0212132	0.0114316	0.261512	15.258	0.170059	76.9568
2021-05-26	NOC	0.061008	0.0610061	0.0254387	0.0254384	0.523599	47.5746	0.320089	5362.67	0.00424264	0.00954594	0.0676465	0.850685	0.00872098	26.3987
2021-05-26	NOC	0.0971632	0.0971585	0.0433399	0.043339	0.944266	74.2755	0.597547	3822.67	0.0108423	0.0117851	0.0890955	4.60355	0.183376	12.7279
2021-05-26	NOC	0.270876	0.27084	0.184937	0.18492	2.35643	173.202	0.876933	2160.83	0.00447834	0.0288735	0.203175	11.0005	0.0278129	5.18545
2021-10-20	NOC	0.0196139	0.0196137	0.137139	0.137129	0.00513448	-52.7906	-1.09198	29592.1	0.0286378	0.0450191	0.0769568	4.69906	0.283196	61.8718
2021-10-20	NOC	0.0309657	0.0309653	0.145453	0.145443	-0.0244489	-45.8286	-1.18808	25375.3	0.0311127	0.0537401	0.229338	2.51057	0.200583	74.7176
2021-10-20	NOC	0.00666433	0.0066643	0.0743545	0.0743518	-0.00611552	-32.5934	-0.600952	21214.2	0.00459619	0.00565685	0.0436049	7.67859	0.00164992	58.9256
2021-10-20	NOC	0.0238183	0.023818	0.0512771	0.0512758	-0.102782	-3.25564	-0.512999	16838.7	0.00129636	0.000707107	0.0697679	1.68816	0.0754247	53.9758
2021-10-20	NOC	0.00599162	0.00599161	0.0193759	0.0193758	-0.0265322	-4.2388	-0.18154	13990.7	0.0194454	0.0294628	0.0703571	3.78299	0.165345	16.4992
2021-10-20	NOC	-0.00796697	-0.007967	-0.00149555	-0.00149556	-0.0280322	-7.17735	-0.0160678	10978.2	0.00341768	0.00777817	0.00200347	0.732723	0.0602219	8.36743
2021-10-20	NOC	0.0137277	0.0137276	0.00257693	0.00257693	0.0483011	12.367	0.0276857	8314.42	0.0232167	0.0398337	0.0258094	2.01332	0.29286	28.1664
2021-10-20	NOC	0.0156617	0.0156616	0.0152186	0.0152185	0.244968	7.62624	0.123219	6817	0.00612826	0.0342947	0.0882705	12.252	0.186087	64.111
2021-10-20	NOC	0.0318066	0.0318061	-0.0138827	-0.0138828	0.739384	39.1362	0.850446	5387.5	0.0226274	0.00424264	0.388437	25.1124	0.422378	84.6171
2021-10-20	NOC	0.0525763	0.0525749	0.0329509	0.0329504	0.740801	35.1771	0.477194	3737.5	0.00412479	0.0113137	0.00907454	1.92003	0.0995842	12.2565
2021-10-20	NOC	0.247408	0.247377	0.230551	0.230525	2.0393	125.66	0.19489	2054.5	0.0195633	0.0225096	0.0187383	7.6379	0.161338	8.01388
2022-01-05	NOC	0.0133408	0.0133407	0.126706	0.126698	0.0982872	-53.5557	-0.915358	30030.4	0.0156742	0.0157921	0.0824958	7.32482	0.208832	207.064
2022-01-05	NOC	-0.014149	-0.0141491	0.0768246	0.0768217	0.0647038	-54.711	-0.549893	25878.6	0.0157921	0.00188562	0.0821422	16.9442	0.0972272	148.61
2022-01-05	NOC	-0.0161666	-0.0161667	0.0476426	0.0476414	0.0266205	-41.3214	-0.35452	21574.2	0.000707107	0.0216846	0.120444	10.9416	0.293921	21.8025
2022-01-05	NOC	-0.0133083	-0.0133084	0.0273678	0.0273675	0.00495385	-27.7584	-0.213989	17098.2	0.00447834	0.0298163	0.0622254	11.5079	0.300756	65.9966
2022-01-05	NOC	0.00325277	0.00325277	0.0199026	0.0199025	0.0147038	-7.25573	-0.144517	13973.1	0.0170884	0.00577471	0.0439585	14.1348	0.0901561	56.215
2022-01-05	NOC	0.000814842	0.000814841	0.00878971	0.00878967	-0.0377128	-3.82611	-0.108031	10875.5	0.000471405	0.0162635	0.0942809	8.26572	0.0358267	32.7626
2022-01-05	NOC	-0.00162309	-0.00162309	-0.0175081	-0.0175082	0.0751205	7.62126	0.215185	8256.08	0.00624611	0.00919239	0.0205061	11.242	0.053033	8.83883
2022-01-05	NOC	0.0094737	0.00947365	-0.014539	-0.0145391	0.228871	17.1503	0.345182	6696.08	0.0208597	0.0246309	0.0639932	7.80394	0.133054	118.912
2022-01-05	NOC	0.0449498	0.0449488	-0.000881089	-0.000881089	0.317121	45.414	0.324169	5065.33	0.00907454	0.00565685	0.146607	6.11348	0.191862	33.234
2022-01-05	NOC	0.136582	0.136573	0.0871741	0.0871703	0.734204	90.5471	0.0368111	3590.75	0.00836743	0.0172063	0.0437228	17.6879	0.181373	27.2236
2022-01-05	NOC	0.331112	0.331058	0.340057	0.339999	1.57029	151.538	-1.15017	2209.25	0.0100173	0.00176777	0.0176777	9.15302	0.0318198	16.3813

## Sheet: MixingRatioDependencyFunction
coefficient	d17O mean	d17O SD	d18O mean	d18O SD	d2H mean	d2H SD
a_ICE	937.081	74.1099	1123.39	101.2	8886.94	423.033
b_ICE	3.46485e-06	4.71834e-07	1.00944e-05	8.32471e-07	1.12355e-05	4.66003e-06
c_ICE	-0.125947	0.0137345	-0.21526	0.0216278	-1.01437	0.11534
a_NOC	676.636	55.9864	666.662	90.7721	5272.16	672.209
b_NOC	2.99612e-06	7.07229e-07	9.44484e-06	1.0994e-06	1.47085e-05	5.93717e-06
c_NOC	-0.0983646	0.0152664	-0.163692	0.0246008	-0.64159	0.164603
a_TAP	294.784	91.4122	-26.8218	121.835	161.703	579.346
b_TAP	3.74654e-06	6.22373e-07	1.04626e-05	9.78957e-07	1.87853e-05	6.98188e-06
c_TAP	-0.0653853	0.0185449	-0.0999892	0.0260291	-0.204505	0.160636
