# Supplementary material for: Drivers of diurnal and seasonal dynamics of triple oxygen isotopes in atmospheric water vapor and precipitation at a Mediterranean forest site
Source: Copernicus journal article supplement (doi:10.5194/egusphere-2025-5879), 2025-12-05
Supplement: Supplementary file 3 [file S02_O3HP_database_atm_water_vapor_FINAL.xlsx]

## Sheet: METADATA
	datasheet contains:
	climate and physiological data extracted from O3HP database in hourly resolution from 01/12/2020 to 18/01/2022; https://cooperate.eccorev.fr/db. For further information contact: Ilja Reiter
	isotope data of atmospheric water vapor measured on-site at (1) 0.4, (2) 1.5, (3) 3.5 and (4) 12.5 m above ground level, interpolated to hourly resolution, for further information contact: Claudia Voigt
	climate data from the ICOS Tower at 10, 50 and 100 m above ground, for further information contact: Irene Xueref-Remy
	Variable	Description	unit	Source (if applicable)
	TimeCode	Date & Time of the measurement	UTC	–
	time	Time of the day	UTC	–
	solar_radiation	global solar radiation	W m-2	O3HP database (Reiter et al., 2015)
	RH0615	Atmospheric relative humidity measured at 6.15m	%	O3HP database (Reiter et al., 2015)
	RH0440	Atmospheric relative humidity measured at 4.4m	%	O3HP database (Reiter et al., 2015)
	RH0190	Atmospheric relative humidity measured at 1.9m	%	O3HP database (Reiter et al., 2015)
	RH0150	Atmospheric relative humidity measured at 1.5m	%	O3HP database (Reiter et al., 2015)
	RH0040	Atmospheric relative humidity measured at 0.4m	%	O3HP database (Reiter et al., 2015)
	T0615	Atmospheric temperature measured at 6.15m	ºC	O3HP database (Reiter et al., 2015)
	T0440	Atmospheric temperature measured at 4.4m	ºC	O3HP database (Reiter et al., 2015)
	T0190	Atmospheric rtemperature measured at 1.9m	ºC	O3HP database (Reiter et al., 2015)
	T0150	Atmospheric temperature measured at 1.5m	ºC	O3HP database (Reiter et al., 2015)
	T0040	Atmospheric temperature measured at 0.4m	ºC	O3HP database (Reiter et al., 2015)
	T0005	Atmospheric temperature measured at 0.05m	ºC	O3HP database (Reiter et al., 2015)
	rain	precipitation amount	mm	O3HP database (Reiter et al., 2015)
	H2O_0.4m	raw atmospheric water vapor mixing ratio at 0.4m	ppmv	in-situ measurement with a Picarro CRDS 2140-i
	d17O_0.4m	δ17O of atmospheric water vapor at 0.4m	‰	in-situ measurement with a Picarro CRDS 2140-i
	d18O_0.4m	δ18O of atmospheric water vapor at 0.4m	‰	in-situ measurement with a Picarro CRDS 2140-i
	d2H_0.4m	δ2H of atmospheric water vapor at 0.4m	‰	in-situ measurement with a Picarro CRDS 2140-i
	Exc17_0.4m	17O-excess of atmospheric water vapor at 0.4m	per meg	in-situ measurement with a Picarro CRDS 2140-i
	Exc2_0.4m	d-excess of atmospheric water vapor at 0.4m	‰	in-situ measurement with a Picarro CRDS 2140-i
	H2O_1.5m	raw atmospheric water vapor mixing ratio at 1.5m	ppmv	in-situ measurement with a Picarro CRDS 2140-i
	d17O_1.5m	δ17O of atmospheric water vapor at 1.5m	‰	in-situ measurement with a Picarro CRDS 2140-i
	d18O_1.5m	δ18O of atmospheric water vapor at 1.5m	‰	in-situ measurement with a Picarro CRDS 2140-i
	d2H_1.5m	δ2H of atmospheric water vapor at 1.5m	‰	in-situ measurement with a Picarro CRDS 2140-i
	Exc17_1.5m	17O-excess of atmospheric water vapor at 1.5m	per meg	in-situ measurement with a Picarro CRDS 2140-i
	Exc2_1.5m	d-excess of atmospheric water vapor at 1.5m	‰	in-situ measurement with a Picarro CRDS 2140-i
	H2O_3.5m	raw atmospheric water vapor mixing ratio at 3.5m	ppmv	in-situ measurement with a Picarro CRDS 2140-i
	d17O_3.5m	δ17O of atmospheric water vapor at 3.5m	‰	in-situ measurement with a Picarro CRDS 2140-i
	d18O_3.5m	δ18O of atmospheric water vapor at 3.5m	‰	in-situ measurement with a Picarro CRDS 2140-i
	d2H_3.5m	δ2H of atmospheric water vapor at 3.5m	‰	in-situ measurement with a Picarro CRDS 2140-i
	Exc17_3.5m	17O-excess of atmospheric water vapor at 3.5m	per meg	in-situ measurement with a Picarro CRDS 2140-i
	Exc2_3.5m	d-excess of atmospheric water vapor at 3.5m	‰	in-situ measurement with a Picarro CRDS 2140-i
	H2O_12.5m	raw atmospheric water vapor mixing ratio at 12.5m	ppmv	in-situ measurement with a Picarro CRDS 2140-i
	d17O_12.5m	δ17O of atmospheric water vapor at 12.5m	‰	in-situ measurement with a Picarro CRDS 2140-i
	d18O_12.5m	δ18O of atmospheric water vapor at 12.5m	‰	in-situ measurement with a Picarro CRDS 2140-i
	d2H_12.5m	δ2H of atmospheric water vapor at 12.5m	‰	in-situ measurement with a Picarro CRDS 2140-i
	Exc17_12.5m	17O-excess of atmospheric water vapor at 12.5m	per meg	in-situ measurement with a Picarro CRDS 2140-i
	Exc2_12.5m	d-excess of atmospheric water vapor at 12.5m	‰	in-situ measurement with a Picarro CRDS 2140-i
	T10	atmospheric temperature at 10m	ºC	ICOS Tower Observatoire de Haute Provence, provided by I. Xueref-Remy
	P10	atmospheric pressure at 10m	hPa	ICOS Tower Observatoire de Haute Provence, provided by I. Xueref-Remy
	RH10	relative humidity at 10m	%	ICOS Tower Observatoire de Haute Provence, provided by I. Xueref-Remy
	v10	wind velocity at 10m	m s-1	ICOS Tower Observatoire de Haute Provence, provided by I. Xueref-Remy
	u10	wind direction at 10m	º	ICOS Tower Observatoire de Haute Provence, provided by I. Xueref-Remy
	T50	atmospheric temperature at 10m	ºC	ICOS Tower Observatoire de Haute Provence, provided by I. Xueref-Remy
	RH50	relative humidity at 10m	%	ICOS Tower Observatoire de Haute Provence, provided by I. Xueref-Remy
	v50	wind velocity at 10m	m s-1	ICOS Tower Observatoire de Haute Provence, provided by I. Xueref-Remy
	u50	wind direction at 10m	º	ICOS Tower Observatoire de Haute Provence, provided by I. Xueref-Remy
	T100	atmospheric temperature at 10m	ºC	ICOS Tower Observatoire de Haute Provence, provided by I. Xueref-Remy
	RH100	relative humidity at 10m	%	ICOS Tower Observatoire de Haute Provence, provided by I. Xueref-Remy
	v100	wind velocity at 10m	m s-1	ICOS Tower Observatoire de Haute Provence, provided by I. Xueref-Remy
	u100	wind direction at 10m	º	ICOS Tower Observatoire de Haute Provence, provided by I. Xueref-Remy
	WeatherRegime_Winter	dominant winter-time weather regime	–	classified based on daily-averaged 500 hPa geopotential height fields
	WeatherRegime_Summer	dominant summer-time weather regime	–	classified based on daily-averaged 500 hPa geopotential height fields
	Moisture_Sources	dominant moisture source region	–	derived from HYSPLIT back-trajectory analysis

## Sheet: data
TimeCode	solar_radiation	RH0615	RH0440	RH0190	RH0150	RH0040	T0615	T0440	T0190	T0150	T0040	T0005	rain	H2O_0.4m	d17O_0.4m	d18O_0.4m	d2H_0.4m	Exc17_0.4m	Exc2_0.4m	H2O_1.5m	d17O_1.5m	d18O_1.5m	d2H_1.5m	Exc17_1.5m	Exc2_1.5m	H2O_3.5m	d17O_3.5m	d18O_3.5m	d2H_3.5m	Exc17_3.5m	Exc2_3.5m	H2O_12.5m	d17O_12.5m	d18O_12.5m	d2H_12.5m	Exc17_12.5m	Exc2_12.5m	T10	P10	RH10	v10	u10	T50	RH50	v50	u50	T100	RH100	v100
2020-12-19												3.49165	0																			11400.6	-8.73899	-16.5749	-120.837	47.4345	11.7622	7.42	942.955	85.037	2.287	77.064	7.578	82.278	4.149	96.03	7.525	83.343	5.574
2020-12-19 01:00:00												3.54596	0	10367.1	-9.07067	-17.1722	-127.619	33.5547	9.75871													11418.5	-8.73892	-16.5595	-120.907	39.2776	11.5691	7.57	942.855	83.265	2.193	72.873	7.822	79.11	3.778	86.257	7.682	80.322	4.858
2020-12-19 02:00:00	0.040708											4.99614	0.186445	10955.9	-8.80799	-16.6717	-123.974	29.8785	9.39929													11436.4	-8.73885	-16.5442	-120.978	31.1208	11.3761	7.883	942.245	80.098	1.765	43.889	7.962	77.158	3.34	64.152	7.86	78.223	3.831
2020-12-19 03:00:00	-0.011939											5.94428	0.559336	11544.8	-8.54531	-16.1712	-120.33	26.2024	9.03987													11491.9	-8.69961	-16.4586	-120.938	24.7478	10.731	7.355	941.907	89.545	2.152	69.889	7.423	83.448	3.68	83.452	7.277	86.027	4.435
2020-12-19 04:00:00	-0.019314											6.13246	0	12133.6	-8.28263	-15.6707	-116.686	22.5263	8.68046													11634.4	-8.5697	-16.2103	-120.642	22.5046	9.03967	7.225	941.63	91.105	2.323	67.579	7.278	85.17	3.841	80.588	7.145	89.117	4.196
2020-12-19 05:00:00	-0.091224											6.22855	0	12353.4	-8.22399	-15.5625	-115.684	23.598	8.81616													11776.8	-8.43979	-15.9619	-120.347	20.2614	7.34833	7.385	941.422	89.133	1.926	83.487	7.343	85.332	3.643	94.896	7.29	88.408	4.516
2020-12-19 06:00:00	-0.001667											6.15893	0	12481.9	-8.21583	-15.5514	-115.337	25.8445	9.07437													11948	-8.31967	-15.7332	-119.752	18.6715	6.11407	7.868	941.073	84.24	1.666	54.382	7.865	81.362	2.708	72.99	7.725	84.557	3.515
2020-12-19 07:00:00	12.1988											6.67094	0.372891	12610.4	-8.20767	-15.5402	-114.989	28.0909	9.33259													12185.8	-8.22225	-15.5499	-118.46	18.5958	5.93898	8.038	941.096	85.967	1.82	89.849	7.965	84.147	3.291	94.639	7.768	90.023	4.011
2020-12-19 08:00:00	33.846											7.83234	0	12853	-8.18064	-15.4875	-113.83	27.065	10.0704													12423.6	-8.12482	-15.3666	-117.169	18.5201	5.76389	8.51	941.217	85.833	1.592	73.12	8.263	81.257	3.113	91.591	8.053	84.412	3.696
2020-12-19 09:00:00	16.1908											8.45821	0	13123.9	-8.14893	-15.4245	-112.469	25.2294	10.9269													12679.4	-8.03293	-15.1955	-115.713	19.3887	5.85085	8.83	941.43	84.247	2.249	60.342	8.512	79.122	3.803	69.214	8.393	80.693	4.342
2020-12-19 10:00:00	32.0298											10.0238	0	13394.8	-8.11722	-15.3614	-111.108	23.3938	11.7834													12977	-7.95385	-15.0525	-113.875	22.4437	6.54449	9.735	941.477	78.47	2.024	86.819	9.042	77.855	3.503	80.393	8.805	80.538	4.178
2020-12-19 11:00:00	20.1462											9.96818	0	13544.5	-8.09416	-15.3235	-110.545	26.3109	12.0435													13274.6	-7.87477	-14.9095	-112.038	25.4986	7.23814	9.585	941.667	85.263	2.909	69.855	8.972	82.288	4.295	68.964	8.793	83.24	4.652
2020-12-19 12:00:00	16.8424											10.2869	0	13664.1	-8.07325	-15.2918	-110.178	30.4039	12.1561													13560.4	-7.81884	-14.8076	-110.481	27.2648	7.97991	10.16	941.93	80.648	2.5	72.338	9.488	80.292	3.89	69.794	9.267	82.365	4.639
2020-12-19 13:00:00	6.17266											10.4352	0	13783.8	-8.05233	-15.2601	-109.812	34.4969	12.2687													13818.9	-7.81651	-14.8009	-109.574	26.0478	8.83312	10.382	941.32	82.143	1.768	85.332	9.71	83.345	2.508	79.234	9.422	87.267	2.941
2020-12-19 14:00:00	3.90452											10.1022	0	13969.9	-7.97497	-15.1094	-109.376	31.6579	11.4992													14077.4	-7.81417	-14.7943	-108.668	24.8308	9.68632	10.198	940.748	87.533	1.926	124.053	9.512	88.575	2.621	124.472	9.248	93.955	3.188
2020-12-19 15:00:00	3.01608											9.51715	0	14172.4	-7.88366	-14.9291	-108.922	27.1036	10.5113													14276.6	-7.81454	-14.7927	-108	23.6163	10.3415	9.795	940.43	93.712	1.547	116.895	9.382	91.307	2.02	118.543	9.353	94.483	2.368
2020-12-19 16:00:00	-0.036374											8.81897	0.186445	14375	-7.79234	-14.7489	-108.468	22.5494	9.52346													14338.8	-7.82117	-14.8029	-107.885	22.4077	10.5385	9.525	940.39	97.52	1.695	127.818	9.313	92.537	3.291	131.452	9.253	97.55	4.746
2020-12-19 17:00:00	-0.126696											8.5058	0.186445	14343.5	-7.8257	-14.8119	-109.21	22.6515	9.28465													14401	-7.8278	-14.8131	-107.77	21.199	10.7354	9.585	940.502	97.717	1.082	69.545	9.228	93.232	2.176	97.703	9.175	99.838	3.346
2020-12-19 18:00:00	-0.195738											8.23959	0.186445	14254.2	-7.88989	-14.9349	-110.248	23.9052	9.23108													14447.3	-7.84711	-14.8487	-107.883	20.8197	10.907		940.489	99.9	1.284	98.71	8.767	98.76	1.959	96.354		99.9	2.27
2020-12-19 19:00:00	-0.104497											7.98397	0	14164.9	-7.95408	-15.058	-111.286	25.1589	9.17751													14456.8	-7.89575	-14.9431	-108.524	22.3596	11.0201		940.641	99.9	1.303	67.513		99.9	2.071	88.442		99.9	3.041
2020-12-19 20:00:00	-0.036062											8.28817	0	14216.7	-8.07294	-15.2804	-112.503	24.5893	9.73978													14466.4	-7.94439	-15.0374	-109.166	23.8994	11.1331		940.962	99.9	1.555	68.634		99.9	2.432	88.685		99.9	3.489
2020-12-19 21:00:00	0.32959											8.3668	0	14303.5	-8.20532	-15.5273	-113.764	23.5686	10.4544													14460.7	-8.03424	-15.2083	-110.381	24.9599	11.2851		941.024	99.9	1.366	95.379		99.9	3.018	120.717		99.9	4.391
2020-12-19 22:00:00												8.37491	0	14390.2	-8.33769	-15.7743	-115.025	22.5479	11.169													14419.7	-8.21947	-15.5564	-112.924	24.9113	11.5273		941.155	99.9	1.887	123.045		99.9	3.484	127.129		99.9	4.321
2020-12-19 23:00:00												8.32845	0	14282.9	-8.40324	-15.899	-116.036	23.3647	11.1565													14378.8	-8.40471	-15.9045	-115.467	24.8627	11.7695		941.302	99.9	1.879	100.732		99.9	2.936	113.456		99.9	4.086
2020-12-20												8.1474	0	14127.6	-8.45228	-15.9936	-116.984	24.6351	10.9645													14307.3	-8.53446	-16.1491	-117.224	25.1951	11.9686		941.388	99.9	1.773	115.32	8.42	99.888	3.161	119.957		99.9	3.835
2020-12-20 01:00:00												7.69301	0	13972.3	-8.50133	-16.0881	-117.933	25.9055	10.7725													14165.3	-8.53592	-16.1541	-117.165	26.4084	12.0681		941.398	99.9	1.175	67.447	8.467	98.505	2.006	101.091		99.9	2.728
2020-12-20 02:00:00	-0.178768											7.01126	0	13760.6	-8.5562	-16.1882	-118.826	24.2744	10.6801													14023.3	-8.53739	-16.1591	-117.105	27.6217	12.1676		941.241	99.9	1.932	68.994	8.42	97.248	3.322	73.083		99.9	3.702
2020-12-20 03:00:00	-0.254377											5.90533	0	13534.9	-8.61251	-16.2897	-119.705	21.9272	10.6123													13889.7	-8.54988	-16.1826	-117.243	27.6052	12.2174	9.2	941.005	99.9	2.014	52.968	8.453	95.67	3.343	71.406		99.9	3.625
2020-12-20 04:00:00	-0.02591											7.16462	0	13309.3	-8.66883	-16.3911	-120.585	19.58	10.5445													13775.4	-8.58783	-16.2486	-117.836	24.7474	12.1523		940.78	99.9	1.73	57.618	8.08	97.48	2.93	72.302		99.9	3.257
2020-12-20 05:00:00	-0.216224											7.20817	0	13133	-8.68776	-16.4299	-121.015	21.2931	10.4239													13661.1	-8.62578	-16.3145	-118.429	21.8896	12.0873	8.342	940.471	99.632	1.526	69.584	8.04	95.713	2.986	90.734	8	99.865	3.51
2020-12-20 06:00:00	-0.240646											6.69306	0	12968.9	-8.69749	-16.4532	-121.336	24.0057	10.2903													13581.1	-8.65936	-16.3752	-118.944	20.5877	12.0577		940.216	99.9	1.368	73.101	8.008	95.215	2.092	72.662	8.017	98.087	2.574
2020-12-20 07:00:00	8.69501											6.62645	0	12804.8	-8.70722	-16.4766	-121.656	26.7183	10.1566													13580.1	-8.68286	-16.4236	-119.279	22.8801	12.1104		940.252	99.9	1.226	89.312	7.878	94.767	2.197	83.512	8.043	96.218	2.925
2020-12-20 08:00:00	17.5695											7.95491	0	13183.7	-8.85808	-16.7623	-123.37	27.9761	10.7291													13579.2	-8.70635	-16.4721	-119.613	25.1725	12.1631	8.381	940.201	98.523	1.363	56.833	8.193	92.503	2.345	66.34	8.113	99.163	3.12
2020-12-20 09:00:00	18.6248											8.76897	0	13696.4	-9.04373	-17.1128	-125.426	28.8755	11.4757													13630.6	-8.84273	-16.7322	-121.623	27.319	12.2345	8.948	940.336	95.803	1.543	53.546	8.552	93.862	2.929	58.054	8.3	99.873	3.418
2020-12-20 10:00:00	18.4123											8.99488	0	14209.1	-9.22938	-17.4632	-127.483	29.7749	12.2222													13802.3	-9.23937	-17.4805	-127.495	29.1289	12.3491	8.96	940.657	98.02	1.823	91.737	8.372	96.098	2.79	94.757		99.9	3.807
2020-12-20 11:00:00	18.8683											9.16504	0	14403.6	-9.43007	-17.8399	-130.382	29.6831	12.3373													13974.1	-9.63601	-18.2288	-133.366	30.9389	12.4637	8.922	941.078	99.653	1.607	102.723	8.277	98.623	2.513	102.185		99.9	3.049
2020-12-20 12:00:00	14.4153											8.98713	0.372891	14519.7	-9.63448	-18.2231	-133.488	29.3472	12.2969													14153.8	-9.90115	-18.7283	-137.342	31.7942	12.4846		941.459	99.9	1.754	87.44		99.9	2.542	91.576		99.9	3.044
2020-12-20 13:00:00	13.9122											8.92717	0.372891	14635.9	-9.83888	-18.6062	-136.593	29.0113	12.2565													14351.7	-9.86269	-18.6536	-136.939	30.4456	12.2894		941.26	99.9	1.418	103.964		99.9	2.074	116.947		99.9	2.728
2020-12-20 14:00:00	12.0566											8.97767	0	14276.8	-10.1883	-19.2625	-141.065	29.3564	13.0348													14549.5	-9.82423	-18.5789	-136.537	29.097	12.0942		940.911	99.9	1.587	95.016		99.9	2.436	113.968		99.9	3.366
2020-12-20 15:00:00	3.75681											8.32668	1.30512	13800.8	-10.5735	-19.9861	-145.874	29.8692	14.0147													14525.6	-9.94807	-18.809	-138.293	27.9314	12.1793		940.605	99.9	1.532	80.509		99.9	2.188	88.743		99.9	3.092
2020-12-20 16:00:00	-0.189377											7.33399	2.79668	13324.7	-10.9586	-20.7096	-150.682	30.3819	14.9945													13989.9	-10.4465	-19.7426	-145.03	27.1882	12.9111		940.592	99.9	2.583	245.199	7.562	94.363	3.652	244.443	7.753	96.363	3.235
2020-12-20 17:00:00	-0.35442											7.26961	1.11867	13308.3	-11.1273	-21.0249	-153.457	29.8309	14.7424													13454.1	-10.9448	-20.6762	-151.767	26.445	13.6429		940.949	99.9	2.37	298.155	7.782	92.052	3.863	301.312	7.935	92.463	2.971
2020-12-20 18:00:00	-0.104246											7.19224	0.186445	13405.1	-11.2426	-21.2396	-155.73	29.0178	14.1869													13138.5	-11.2901	-21.3213	-156.632	25.0296	13.9382		941.534	99.9	1.373	293.914	7.526	99.092	1.597	255.828		99.9	1.532
2020-12-20 19:00:00	-0.186797											7.6266	0	13501.9	-11.358	-21.4544	-158.004	28.2047	13.6313													13330.8	-11.2822	-21.301	-157.181	22.064	13.2265		942.104	99.9	1.122	61.795		99.9	1.66	109.133		99.9	2.27
2020-12-20 20:00:00	-0.160725											7.61402	0	13433	-11.3467	-21.4351	-157.893	29.2014	13.5875													13523.1	-11.2743	-21.2807	-157.731	19.0983	12.5148		942.606	99.9	0.841	130.395		99.9	1.612	133.024		99.9	2.366
2020-12-20 21:00:00	-0.501251											7.4457	0	13323.3	-11.3043	-21.3582	-157.196	30.643	13.6695													13566.9	-11.2935	-21.3135	-158.686	17.4313	11.8223		943.301	99.9	1.019	70.381		99.9	1.771	101.198		99.9	2.287
2020-12-20 22:00:00												7.22354	0	13213.5	-11.2619	-21.2814	-156.5	32.0846	13.7515													13268	-11.375	-21.4688	-160.576	18.7591	11.1739		943.627	99.9	0.66	20.583	7.37	98.648	1.147	57.602		99.9	1.221
2020-12-20 23:00:00												4.67273	0	12616.6	-11.4523	-21.6364	-159.404	31.0742	13.6875													12969.1	-11.4565	-21.6241	-162.467	20.087	10.5256		943.904	99.9	0.821	8.728	7.232	97.417	0.99	44.078		99.9	0.947
2020-12-21												3.60385	0.186445	11899.7	-11.7	-22.0977	-163.194	29.4602	13.5875													12705.8	-11.532	-21.7667	-163.991	20.6537	10.1424	7.16	944.125	99.9	1.323	45.415	7.132	99.235	2.064	66.075		99.9	2.153
2020-12-21 01:00:00												3.99626	0	11182.7	-11.9477	-22.5589	-166.984	27.8461	13.4875													12524.7	-11.5937	-21.88	-164.67	19.466	10.3702	6.96	944.137	99.543	1.837	345.728	7.732	89.375	1.695	23.991	7.77	90.483	1.749
2020-12-21 02:00:00	-0.18516											3.4163	0	10808.2	-12.0157	-22.6831	-167.997	26.0539	13.4676													12343.5	-11.6554	-21.9934	-165.349	18.2782	10.5981		943.672	99.9	2.872	307.657	7.282	92.162	2.695	300.158	7.595	91.833	1.242
2020-12-21 03:00:00	-0.217122											3.47456	0	10517.6	-12.0397	-22.7246	-168.329	24.2181	13.4674													12145.5	-11.696	-22.0683	-165.928	17.5575	10.6184	6.6	943.759	99.858	1.174	27.817	6.488	99.508	1.87	335.125		99.717	1.288
2020-12-21 04:00:00	-0.351151											3.4654	0	10226.9	-12.0636	-22.766	-168.661	22.3822	13.4672													11908.4	-11.6884	-22.0546	-166.276	17.9127	10.1606		943.993	99.9	1.367	31.795		99.9	1.71	65.178		99.9	1.805
2020-12-21 05:00:00	-0.33388											2.55358	0	9914.74	-12.1726	-22.9694	-170.402	21.9227	13.3531													11671.3	-11.6807	-22.0409	-166.625	18.2679	9.70272		944.002	99.9	0.918	58.812		99.9	1.766	57.677		99.9	2.27
2020-12-21 06:00:00	0.044001											2.29059	0	9597.22	-12.3025	-23.2125	-172.489	21.8014	13.211													11703.7	-11.5883	-21.8661	-165.827	17.4898	9.102		943.92	99.9	1.004	29.024	5.414	99.885	1.096	61.005	6.314	99.77	1.777
2020-12-21 07:00:00	18.3009											2.22055	0	9279.71	-12.4324	-23.4556	-174.575	21.6801	13.069													12355.9	-11.3007	-21.3206	-162.392	14.1043	8.17254		943.71	99.9	0.879	350.716	6.127	96.635	0.828	32.611	6.937	89.043	1.686
2020-12-21 08:00:00	15.6165											3.9725	0	10270	-12.1655	-22.9541	-169.672	20.953	13.9602													13008.2	-11.0131	-20.7751	-158.958	10.7187	7.24308	6.54	943.895	99.835	0.964	348.482	6.308	95.558	0.861	35.583	6.942	87.737	2.169
2020-12-21 09:00:00	53.2898											6.61722	0	11580.9	-11.8013	-22.2701	-163.056	20.0774	15.1048													13409.7	-10.8001	-20.3722	-156.139	8.70877	6.839	7.402	944.396	96.862	0.694	95.031	6.887	93.092	0.872	69.687	7.223	84.282	2.106
2020-12-21 10:00:00	23.6056											8.2011	0	12891.8	-11.4371	-21.586	-156.439	19.2018	16.2494													13234.7	-10.7589	-20.297	-154.733	9.86061	7.64257	7.448	944.872	93.022	0.758	137.386	6.852	87.303	0.964	42.062	6.96	83.823	2.131
2020-12-21 11:00:00	126.802											9.74848	0	13177.9	-11.2659	-21.2664	-154.217	19.9135	15.9141													13059.8	-10.7177	-20.2218	-153.328	11.0125	8.44615	8.29	945.549	84.573	1.651	69.552	7.29	85.885	2.487	72.732	7.065	86.153	3.25
2020-12-21 12:00:00	69.0219											10.6827	0	13212.5	-11.1421	-21.0363	-153.075	21.0149	15.2155													12982.3	-10.6966	-20.185	-152.319	12.4677	9.16131	9.345	946.034	80.788	1.847	90.104	8.478	82.86	2.128	82.803	8.348	84.585	2.179
2020-12-21 13:00:00	15.3175											10.9575	0	13247	-11.0182	-20.8061	-151.932	22.1162	14.517													13129	-10.7219	-20.2365	-152.219	14.6207	9.67313	9.992	945.495	81.957	1.468	149.339	9.115	84.188	1.65	155.412	8.8	87.672	1.458
2020-12-21 14:00:00	14.9026											9.82245	0	13153.6	-11.0387	-20.8426	-152.869	21.1228	13.8715													13275.7	-10.7472	-20.288	-152.119	16.7738	10.185	9.565	945.129	83.832	1.628	196.512	8.862	85.093	2.128	197.473	8.567	88.743	2.08
2020-12-21 15:00:00	9.89756											8.91996	0	13028.9	-11.0944	-20.9443	-154.315	19.6168	13.239													13285	-10.8035	-20.3958	-152.564	18.0473	10.6025	9.022	944.783	89.182	1.843	245.265	8.51	88.6	2.531	245.06	8.318	91.52	2.631
2020-12-21 16:00:00	-0.086472											8.19516	0	12904.1	-11.1501	-21.046	-155.762	18.1109	12.6065													12978.8	-10.9308	-20.6332	-154.262	17.3011	10.8034	8.72	944.646	87.573	1.532	279.687	8.455	84.008	2.158	277.628	8.293	83.96	1.689
2020-12-21 17:00:00	-0.342876											7.84818	0	12833.5	-11.1324	-21.0095	-155.99	16.332	12.0855													12672.5	-11.0581	-20.8706	-155.96	16.555	11.0043	8.508	944.71	86.17	1.823	287.099	8.422	80.607	3.593	274.69	8.458	77.48	4.425
2020-12-21 18:00:00	-0.323218											7.52552	0	12776.2	-11.0967	-20.9391	-155.921	14.4863	11.5919													12385	-11.124	-20.9926	-156.794	15.7146	11.1471	8.43	944.657	88.262	2.724	285.531	8.498	84.692	4.54	276.285	8.79	81.583	5.043
2020-12-21 19:00:00	-0.290722											7.09335	0	12718.9	-11.061	-20.8687	-155.851	12.6406	11.0983													12140.5	-11.0488	-20.8497	-155.642	14.6578	11.156	8.3	944.802	92.115	1.62	322.761	8.38	85.258	3.747	299.903	8.587	78.362	4.428
2020-12-21 20:00:00	-0.308374											6.65964	0	12256.4	-11.0905	-20.9256	-156.476	13.4908	10.9287													11896	-10.9737	-20.7068	-154.489	13.6009	11.1649	8.248	944.978	83.618	1.986	314.153	8.922	65.482	3.685	312.302	9.252	57.932	4.483
2020-12-21 21:00:00	-1.62582											5.42772	0	11694.8	-11.136	-21.0138	-157.272	15.0008	10.8383													11687.3	-10.909	-20.5861	-153.638	13.9324	11.051	7.965	945.149	79.385	2.506	297.08	8.203	72.017	3.254	294.632	8.353	65.762	3.059
2020-12-21 22:00:00												5.67093	0	11133.1	-11.1815	-21.1019	-158.067	16.5107	10.7479													11560.6	-10.8684	-20.5164	-153.477	17.455	10.6549	7.682	945.017	81.177	2.628	292.472	7.74	76.162	3.303	277.364	7.835	74.022	3.657
2020-12-21 23:00:00												6.04066	0	10837.9	-11.1598	-21.0607	-158.095	16.265	10.3903													11433.9	-10.8278	-20.4468	-153.316	20.9775	10.2588	7.113	944.708	85.35	2.279	281.048	7.155	81.528	3.317	274.435	7.228	80.44	3.896
2020-12-22												5.48798	0	10607.8	-11.1216	-20.9878	-157.935	15.59	9.96725													11353.9	-10.8062	-20.41	-153.217	22.9301	10.0631	6.875	944.663	86.373	2.773	266.678	7.158	81.232	4.406	272.074	7.363	79.618	4.91
2020-12-22 01:00:00												3.71955	0	10377.8	-11.0834	-20.915	-157.776	14.915	9.54425													11381	-10.8285	-20.4488	-153.263	21.2774	10.3276	7.05	944.544	86.06	2.502	279.519	7.063	83.617	4.71	284.16	7.047	84.255	5.963
2020-12-22 02:00:00	-0.250668											3.31782	0	10149.6	-11.1659	-21.0689	-159.172	14.5689	9.37953													11408.2	-10.8508	-20.4875	-153.308	19.6247	10.592	6.678	944.274	91.845	1.164	12.633	6.598	88.775	1.422	17.739	6.453	90.83	1.82
2020-12-22 03:00:00	-0.250678											2.57717	0	9921.88	-11.2779	-21.2784	-160.949	14.3033	9.27808													11436.4	-10.8667	-20.5151	-153.347	18.4794	10.7744	6.298	943.989	96.443	0.524	181.383	6.307	92.485	0.598	108.474	6.373	93.083	0.32
2020-12-22 04:00:00	-0.240214											2.48443	0	9694.18	-11.3899	-21.4879	-162.727	14.0378	9.17662													11466.9	-10.8678	-20.5174	-153.371	18.499	10.7686	6.2	944.212	99.853	1.469	23.613	6.131	98.248	1.574	52.547	6.275	99.77	0.873
2020-12-22 05:00:00	-0.344918											2.25355	0	9544.52	-11.4605	-21.6221	-163.686	14.9969	9.29122													11497.4	-10.869	-20.5196	-153.394	18.5186	10.7628		943.991	99.9	1.256	22.179		99.9	1.816	51.117		99.9	2.047
2020-12-22 06:00:00	-0.027324											3.03989	0	9413.96	-11.5211	-21.7379	-164.445	16.2555	9.45867													11619.5	-10.8545	-20.4914	-153.006	18.0161	10.9246		943.965	99.9	1.387	46.856		99.9	1.979	51.644		99.873	2.031
2020-12-22 07:00:00	18.8347											2.23036	0	9283.4	-11.5816	-21.8537	-165.204	17.5142	9.62612													11952.1	-10.8037	-20.393	-151.673	16.3147	11.4712		943.831	99.9	0.898	17.842	5.6	99.898	1.112	94.658		99.9	1.078
2020-12-22 08:00:00	39.1748											3.84655	0	10208	-11.3463	-21.4168	-160.698	19.8188	10.6362													12284.8	-10.7529	-20.2947	-150.34	14.6133	12.0178	6.77	943.765	98.532	0.918	40.69	5.998	95.727	1.265	56.87	6.521	98.603	0.795
2020-12-22 09:00:00	30.7466											6.39257	0.186445	11390.3	-11.0387	-20.8449	-154.907	22.3787	11.8519													12638.6	-10.664	-20.1276	-148.55	14.5135	12.4708	7.352	943.87	92.878	0.759	54.189	7.282	88.725	1.207	48.3	7.29	93.798	1.426
2020-12-22 10:00:00	22.1278											9.42789	0	12572.6	-10.7312	-20.273	-149.116	24.9387	13.0677													13041.2	-10.4875	-19.8031	-145.716	18.0829	12.7094	8.9	944.018	83.977	0.814	127.27	8.1	85.887	0.616	111.474	8.158	86.557	0.905
2020-12-22 11:00:00	19.4932											11.3675	0	13084.8	-10.5562	-19.9451	-146.215	25.144	13.3453													13443.7	-10.311	-19.4786	-142.881	21.6524	12.9481	9.89	944.426	80.082	1.21	139.939	9.073	82.357	1.164	138.11	8.822	85.565	0.774
2020-12-22 12:00:00	65.0135											11.6142	0	13433.4	-10.4135	-19.6767	-144.02	24.774	13.3937													13741.1	-10.1597	-19.1975	-140.545	23.1428	13.0351	10.753	944.729	79.192	1.326	116.105	10.087	80.367	1.177	112.638	10.047	81.202	0.91
2020-12-22 13:00:00	24.9234											11.8875	0	13781.9	-10.2708	-19.4083	-141.825	24.404	13.4421													13796.7	-10.0664	-19.0162	-139.356	19.8553	12.7737	10.753	944.565	81.393	1.184	143.356	10.053	83.045	1.152	155.825	10.202	82.883	1.029
2020-12-22 14:00:00	16.0513											11.1268	0	13533.7	-10.2127	-19.2939	-142.028	21.4891	12.3236													13852.3	-9.97304	-18.8349	-138.167	16.5678	12.5123	10.757	944.167	79.822	1.41	110.116	10.038	81.153	1.457	128.118	10.308	78.537	1.442
2020-12-22 15:00:00	12.8402											9.48526	0	13139.3	-10.1754	-19.2172	-142.818	17.9512	10.9196													13815.2	-9.91874	-18.731	-137.612	15.4877	12.2366	11.132	943.702	78.352	0.95	70.538	10.865	77.343	1.284	57.203	10.947	77.677	1.269
2020-12-22 16:00:00	0.429916											6.53331	0	12745	-10.138	-19.1405	-143.608	14.4134	9.51562													13565.7	-9.95386	-18.8043	-138.506	19.4632	11.9283	10.99	943.497	79.573	0.588	347.877	11.162	76.282	0.605	326.468	11.208	75.963	0.455
2020-12-22 17:00:00	-0.40886											5.38253	0	12322.2	-10.2424	-19.3361	-145.434	14.2632	9.25469													13316.2	-9.98897	-18.8776	-139.401	23.4387	11.62	9.915	943.37	84.035	1.261	9.992	10.09	79.81	1.127	40.413	10.648	73.637	1.284
2020-12-22 18:00:00	-0.371812											4.75712	0	11892.5	-10.3813	-19.5981	-147.512	14.9384	9.27229													13102.1	-10.0412	-18.9797	-140.426	25.6211	11.4115	9.843	943.362	83.667	0.47	161.709	9.735	81.233	0.864	102.762	10.017	82.272	1.355
2020-12-22 19:00:00	-0.366279											4.40362	0	11462.7	-10.5202	-19.86	-149.59	15.6136	9.2899													12969.2	-10.1326	-19.1476	-141.749	23.6962	11.4318	9.66	943.425	82.447	0.613	30.301	9.458	81.07	0.833	120.59	9.412	82.18	1.61
2020-12-22 20:00:00	-0.323237											4.05968	0	11144.6	-10.6392	-20.0804	-151.388	14.1141	9.25501													12836.3	-10.224	-19.3155	-143.072	21.7713	11.4521	9.097	943.725	86.272	0.826	119.499	8.828	85.587	1.8	134.456	8.945	85.96	2.005
2020-12-22 21:00:00	-0.05188											3.44689	0	10853.7	-10.7533	-20.2906	-153.117	12.0847	9.20733													12680	-10.311	-19.4755	-144.488	20.0204	11.3161	8.132	943.921	91.38	1.355	61.61	8.232	88.163	2.128	72.516	8.578	87.048	2.626
2020-12-22 22:00:00												3.2852	0	10562.8	-10.8673	-20.5008	-154.846	10.0552	9.15966													12470.6	-10.388	-19.6175	-146.118	18.6679	10.8222	7.783	944.091	92.508	2.14	31.448	7.898	88.643	3.203	53.787	8.262	88.115	3.88
2020-12-22 23:00:00												3.6921	0	10394.7	-10.9278	-20.6131	-155.86	9.46167	9.04536													12261.1	-10.465	-19.7595	-147.747	17.3153	10.3283	7.438	944.162	94.45	1.721	33.172	7.488	90.332	2.944	64.018	8.072	89.497	3.552
2020-12-23												3.29148	0	10256.4	-10.9753	-20.7016	-156.698	9.21735	8.91485													12089.9	-10.5344	-19.8888	-148.99	16.8463	10.1203	7.057	944.395	98.747	1.984	51.514	7.23	92.03	3.211	66.677	7.915	89.71	3.797
2020-12-23 01:00:00												3.15435	0	10118.1	-11.0227	-20.7902	-157.537	8.97303	8.78435													12006.2	-10.5864	-19.9893	-149.348	18.4013	10.5672	7.363	944.413	93.47	1.536	65.597	7.688	87.14	2.811	81.365	8.41	81.153	4.064
2020-12-23 02:00:00	-0.201842											3.15536	0	10015.6	-11.0619	-20.8656	-158.047	10.0785	8.87848													11922.6	-10.6385	-20.0899	-149.705	19.9563	11.0141	7.86	944.218	88.407	1.348	37.721	8.765	78.463	2.733	48.789	8.78	76.65	4.406
2020-12-23 03:00:00	-0.041304											3.02584	0	9921.89	-11.099	-20.9379	-158.476	11.5136	9.02747													11787.5	-10.6927	-20.1935	-150.245	20.9681	11.3024	7.372	944.211	88.367	1.275	66.479	7.943	79.122	2.935	52.352	9.267	71.215	3.952
2020-12-23 04:00:00	-0.309											2.68509	0	9828.19	-11.1361	-21.0101	-158.905	12.9487	9.17646													11534.8	-10.752	-20.3042	-151.206	20.7367	11.228	6.093	944.229	96.815	1.764	60.614	6.83	83.533	2.827	62.989	9.337	69.097	3.956
2020-12-23 05:00:00	-0.189788											2.7166	0	10059.9	-11.0982	-20.9431	-157.949	15.0555	9.59524													11282	-10.8112	-20.4149	-152.166	20.5052	11.1535	6.945	943.96	86.885	1.361	65.811	8.48	73.735	2.717	70.832	9.803	64.905	4.534
2020-12-23 06:00:00	0.475217											2.89267	0	10370.9	-11.0421	-20.8421	-156.657	17.3259	10.0797													11085.4	-10.8548	-20.4964	-152.788	20.3821	11.1826	8.672	943.622	74.748	2.105	48.441	9.155	68.695	3.732	59.792	9.403	66.735	5.163
2020-12-23 07:00:00	17.407											3.97205	0	10681.8	-10.9861	-20.7411	-155.365	19.5963	10.5641													11017.5	-10.8623	-20.5108	-152.638	20.5071	11.4488	8.542	943.452	73.533	2.058	40.958	9.1	67.052	3.619	49.583	9.362	67.277	4.386
2020-12-23 08:00:00	44.7706											5.80777	0	11392.1	-10.7094	-20.2279	-150.648	22.7716	11.1758													10949.5	-10.8699	-20.5252	-152.487	20.6321	11.715	8.117	943.285	77.123	1.541	73.863	8.707	69.33	3.402	63.054	8.97	71.122	3.576
2020-12-23 09:00:00	33.4294											8.0692	0	12199.5	-10.3791	-19.6146	-145.098	26.1668	11.8184													11165.3	-10.6732	-20.1559	-149.641	20.6447	11.6063	8.412	943.247	80.018	1.423	72.277	7.985	78.433	3.023	71.422	8.02	89.01	3.371
2020-12-23 10:00:00	31.6421											8.97198	0	13006.8	-10.0488	-19.0012	-139.549	29.5621	12.461													12029.2	-10.0097	-18.9101	-140.639	20.4006	10.6414	8.41	943.378	86.49	1.839	73.211	7.767	90.035	2.71	73.566	7.589	99.632	2.872
2020-12-23 11:00:00	28.6649											9.35411	0	13583	-9.5686	-18.0968	-133.332	28.1402	11.442													12893.1	-9.34631	-17.6643	-131.638	20.1565	9.67641	8.73	943.925	95.147	1.961	72.499	8.087	96.617	2.721	70.722		99.9	3.071
2020-12-23 12:00:00	20.5317											9.15724	0	14103.1	-9.05197	-17.1216	-126.954	25.5473	10.0189													13659.9	-8.79309	-16.6256	-124.422	20.1664	8.58251		944.049	99.9	1.926	71.077	8.2	99.898	2.536	68.621		99.9	2.767
2020-12-23 13:00:00	20.3657											9.0638	0	14623.1	-8.53534	-16.1464	-120.576	22.9544	8.59593													14205.2	-8.49143	-16.0597	-121.283	20.7562	7.19433		943.622	99.9	1.808	63.152		99.9	2.469	71.901		99.9	3.118
2020-12-23 14:00:00	13.6414											8.94065	0.186445	14814	-8.29458	-15.6938	-117.194	22.8767	8.35708													14750.5	-8.18977	-15.4938	-118.145	21.346	5.80614		943.201	99.9	2.05	76.378		99.9	3.456	76.388		99.9	4.142
2020-12-23 15:00:00	3.80182											8.8259	0.559336	14924.9	-8.12093	-15.3684	-114.541	23.4108	8.40632													15134.9	-7.95377	-15.0497	-115.645	21.0232	4.7527		942.656	99.9	2.127	77.044		99.9	3.449	82.116		99.9	3.998
2020-12-23 16:00:00	-0.357342											8.7338	0.186445	15035.7	-7.94728	-15.0429	-111.888	23.945	8.45556													15151.7	-7.8678	-14.8835	-114.604	18.6154	4.46402		941.953	99.9	2.133	83.907		99.9	3.6	91.066		99.9	4.178
2020-12-23 17:00:00	-0.402408											8.68326	0.372891	14990.3	-7.88914	-14.938	-111.046	26.305	8.45797													15168.4	-7.78183	-14.7173	-113.563	16.2077	4.17534		941.81	99.9	1.786	93.132		99.9	3.183	101.007		99.9	3.947
2020-12-23 18:00:00	-0.391712											8.63439	0	14906.9	-7.85915	-14.8868	-110.646	29.1099	8.44897													15153.4	-7.69793	-14.5576	-112.788	15.1486	3.67215		941.759	99.9	2.404	99.48		99.9	4.143	112.498		99.9	5.381
2020-12-23 19:00:00	-0.377729											8.49188	0	14823.4	-7.82916	-14.8357	-110.245	31.9149	8.43998													15065.5	-7.61877	-14.4124	-112.622	17.1756	2.67807		941.617	99.9	2.122	131.092		99.9	3.409	138.032		99.9	4.248
2020-12-23 20:00:00	-0.490873											8.3267	0.372891	14656.9	-7.83593	-14.8454	-110.018	30.3087	8.74516													14977.7	-7.53961	-14.2673	-112.455	19.2025	1.68399		941.144	99.9	1.898	118.914		99.9	3.337	128.516		99.9	4.276
2020-12-23 21:00:00	-1.45264											8.17923	0.372891	14470.1	-7.85165	-14.87	-109.833	27.6287	9.12683													14859.3	-7.51092	-14.2142	-112.446	19.6682	1.26734		941.372	99.9	2.418	86.854		99.9	4.118	94.287		99.9	4.64
2020-12-23 22:00:00												7.96894	0.186445	14283.3	-7.86737	-14.8945	-109.648	24.9488	9.50849													14671.4	-7.59748	-14.3713	-112.801	16.5676	2.16965		941.258	99.9	2.689	87.762		99.9	4.673	91.537		99.9	5.122
2020-12-23 23:00:00												7.79367	0.372891	14188.1	-7.91057	-14.98	-109.95	27.2145	9.89017													14483.5	-7.68405	-14.5283	-113.155	13.467	3.07196		940.946	99.9	2.943	86.181		99.9	4.885	89.861		99.9	5.518
2020-12-24												7.78213	0.559336	14115.4	-7.96046	-15.0803	-110.37	30.6848	10.2719													14350.6	-7.76471	-14.6772	-113.382	11.9325	4.03515		940.431	99.9	2.83	74.688		99.9	4.606	82.104		99.9	5.228
2020-12-24 01:00:00												7.83415	0.559336	14042.6	-8.01036	-15.1806	-110.791	34.1552	10.6536													14343.4	-7.83187	-14.8073	-113.321	13.9784	5.13752		940.344	99.9	2.269	57.592		99.9	3.648	67.354		99.9	3.968
2020-12-24 02:00:00	-0.250511											7.90436	0.372891	14044.5	-8.01838	-15.1966	-110.918	34.6588	10.6552													14336.3	-7.89903	-14.9374	-113.259	16.0243	6.23989		939.703	99.9	1.597	42.672		99.9	2.972	63.961		99.9	3.301
2020-12-24 03:00:00	-0.263836											7.9641	0	14064.6	-8.01623	-15.1922	-110.973	34.4422	10.5646													14323.1	-7.94933	-15.0354	-113.423	17.8516	6.86027		939.122	99.9	0.96	354.067		99.9	0.929	43.711		99.9	1.446
2020-12-24 04:00:00	-0.352798											7.92754	0.186445	14084.6	-8.01409	-15.1877	-111.028	34.2256	10.474													14296	-7.96113	-15.0601	-114.101	19.1795	6.37967		939.092	99.9	0.922	297.695		99.9	1.241	256.524		99.9	1.248
2020-12-24 05:00:00	-0.241707											7.99566	0	13788.2	-8.09656	-15.3391	-112.484	32.2792	10.2296													14268.9	-7.97294	-15.0847	-114.779	20.5074	5.89907		938.444	99.9	1.084	273.44		99.9	2.15	261.152		99.9	3.231
2020-12-24 06:00:00	-0.345276											7.18784	0	13414.7	-8.1996	-15.5284	-114.28	29.9124	9.94774													14169.7	-7.99453	-15.1281	-115.493	21.9634	5.53113		938.285	99.9	1.317	279.264		99.9	2.692	277.662		99.9	3.743
2020-12-24 07:00:00	9.15208											6.66862	0	13041.3	-8.30265	-15.7178	-116.076	27.5456	9.66589													13906	-8.03846	-15.2139	-116.291	23.7117	5.42033		938.019	99.9	1.8	245.368	6.941	99.502	3.352	256.725		99.9	4.322
2020-12-24 08:00:00	47.0429											7.08868	0	13004.2	-8.33222	-15.7754	-115.794	28.6678	10.4095													13642.3	-8.08239	-15.2998	-117.089	25.46	5.30953	7.875	937.886	99.895	0.856	256.725	7.17	93.958	2.085	276.567	7.137	95.998	3.671
2020-12-24 09:00:00	66.6181											8.31312	0	13048.7	-8.34397	-15.8012	-115.008	30.637	11.4019													13156.8	-8.12607	-15.3829	-117.57	25.9889	5.49297	8.158	938.058	95.28	2.063	291.973	7.563	92.707	3.656	292.451	7.233	95.745	4.31
2020-12-24 10:00:00	57.9132											9.70432	0.186445	13093.3	-8.35571	-15.8269	-114.221	32.6062	12.3944													12165.6	-8.16918	-15.4597	-117.33	23.7372	6.34736	9.058	938.104	80.307	2.255	267.045	8.142	79.777	3.732	272.492	7.787	81.138	4.564
2020-12-24 11:00:00	57.3687											9.47604	0	12032.6	-8.49722	-16.0948	-115.624	33.6538	13.1345													11174.3	-8.21228	-15.5365	-117.09	21.4855	7.20174	8.773	938.181	67.757	3.447	284.687	7.89	67.487	5.884	288.35	7.53	68.06	7.063
2020-12-24 12:00:00	60.1192											9.77169	0	10703.5	-8.67026	-16.4215	-117.559	34.4776	13.8133													10289.8	-8.27442	-15.6512	-117.27	20.3319	7.93896	8.667	938.037	58.91	4.592	292.156	7.688	58.96	7.368	293.482	7.288	59.218	8.546
2020-12-24 13:00:00	54.2673											9.51266	0	9374.32	-8.84329	-16.7482	-119.494	35.3014	14.4921													9649.05	-8.38003	-15.8522	-118.409	21.6872	8.40848	8.458	937.565	58.202	5.316	298.015	7.557	58.523	8.968	299.454	7.183	59.012	10.302
2020-12-24 14:00:00	49.9839											7.67726	0	9039.51	-8.90827	-16.8698	-120.661	35.0008	14.2969													9008.32	-8.48565	-16.0533	-119.548	23.0425	8.878	7.663	936.843	57.83	4.822	285.667	6.985	57.848	8.184	289.088	6.68	58.423	9.157
2020-12-24 15:00:00	21.1062											6.02367	0	8944.68	-8.94718	-16.9418	-121.644	34.4287	13.8907													8584.7	-8.59174	-16.2548	-120.496	24.1742	9.54279	6.555	935.983	66.917	4.747	285.624	6.118	66.748	7.986	287.174	5.875	67.54	9.31
2020-12-24 16:00:00	0.318387											4.78158	0	8849.84	-8.98608	-17.0138	-122.626	33.8567	13.4845													8654.59	-8.69893	-16.4574	-121.008	24.7977	10.6515	5.642	935.482	72.218	4.028	284.655	5.38	71.178	6.966	289.782	5.21	71.663	8.424
2020-12-24 17:00:00	-0.335831											4.07374	0	8851.77	-9.0451	-17.1218	-123.382	32.3093	13.5928													8724.48	-8.80612	-16.66	-121.519	25.4213	11.7602	5.035	935.337	74.967	4.405	286.527	4.82	73.885	7.611	287.965	4.72	74.208	9.339
2020-12-24 18:00:00	-0.333312											3.3168	0	8877.01	-9.10896	-17.2384	-124.083	30.5269	13.825													8806.42	-8.91088	-16.8581	-122.323	26.1414	12.5425	4.705	934.967	77.173	2.782	301.019	4.598	75.67	5.553	297.265	4.56	75.84	7.661
2020-12-24 19:00:00	-0.297239											3.13798	0	8902.26	-9.17282	-17.3551	-124.783	28.7446	14.0571													8915.67	-9.01013	-17.0463	-123.786	27.0806	12.5844	4.445	934.807	81.387	2.801	298.669	4.247	80.303	6.026	296.117	4.208	81.098	8.294
2020-12-24 20:00:00	-0.144466											3.0762	0	8770.69	-9.24765	-17.4972	-126.361	29.5943	13.6165													9024.92	-9.10939	-17.2346	-125.25	28.0198	12.6264	4.485	934.741	81.38	2.699	299.349	4.357	80.108	5.598	295.508	4.34	80.942	7.834
2020-12-24 21:00:00	-0.485229											1.59445	0	8601.3	-9.32513	-17.6455	-128.15	31.079	13.0135													9114.87	-9.18034	-17.37	-126.29	29.1847	12.67	3.742	934.655	86.048	2.291	282.984	3.908	83.287	4.684	283.889	3.99	84.123	6.912
2020-12-24 22:00:00												1.07664	0	8431.91	-9.40261	-17.7937	-129.939	32.5637	12.4105													9161.03	-9.18705	-17.3857	-126.368	30.8619	12.7177	3.555	934.407	87.325	2.105	281.519	3.798	84.053	3.21	288.598	3.862	85.88	4.453
2020-12-24 23:00:00												1.67654	0	8659.23	-9.4413	-17.8671	-130.228	32.947	12.7094													9207.18	-9.19375	-17.4015	-126.446	32.5391	12.7654	3.163	934.169	93.472	2.33	305.234	3.622	86.995	3.944	305.036	3.632	90.063	5.109
2020-12-25												2.71843	0	8982.18	-9.47065	-17.9224	-130.154	33.0647	13.2258													9155.94	-9.45917	-17.9013	-130.191	33.6326	13.0196	3.433	933.928	95.505	2.206	287.264	3.547	90.487	3.159	291.907	3.42	95.995	3.759
2020-12-25 01:00:00												3.22607	0	9305.14	-9.5	-17.9778	-130.08	33.1825	13.7422													8883.31	-10.3127	-19.5017	-142.271	33.3995	13.7431	3.468	933.523	93.452	2.482	286.666	3.517	86.382	4.13	287.169	3.642	85.517	5.152
2020-12-25 02:00:00	-0.207646											2.54591	0	8782.76	-10.6796	-20.1851	-147.158	31.4514	14.3234													8610.68	-11.1662	-21.1021	-154.351	33.1664	14.4665	3.062	932.87	88.968	3.486	277.232	2.917	84.935	5.437	286.211	2.83	86.358	6.34
2020-12-25 03:00:00	-0.287235											1.42943	0	8056.14	-12.1371	-22.9125	-168.38	29.2736	14.9203													8250.71	-12.0448	-22.7471	-167.093	32.1321	14.8839	2.76	932.044	77.672	4.23	288.222	2.973	72.908	7.287	289.98	2.987	71.668	8.553
2020-12-25 04:00:00	-0.295305											0.746968	0	7329.51	-13.5946	-25.6398	-189.602	27.0957	15.5171													7692.39	-12.9803	-24.493	-181.338	29.2782	14.606	2.487	931.501	70.698	3.597	295.328	2.377	68.87	6.898	299.462	2.217	69.3	7.284
2020-12-25 05:00:00	-0.258659											0.381657	0	7042.22	-13.8378	-26.0927	-193.602	25.4647	15.1403													7134.07	-13.9158	-26.239	-195.584	26.4243	14.3281	1.378	931.219	76.27	2.732	297.952	1.28	74.285	4.989	303.152	1.357	72.65	6.247
2020-12-25 06:00:00	-0.111149											0.182468	0	6860.85	-13.7882	-25.9973	-193.449	23.9655	14.5287													6690.77	-14.4306	-27.1994	-203.529	24.5568	14.0659	1.303	931.071	73.585	4.405	280.599	1.348	70.48	8.484	288.45	1.515	67.598	10.866
2020-12-25 07:00:00	43.7129											0.379472	0	6679.48	-13.7386	-25.9018	-193.297	22.4663	13.9172													6508.72	-13.9896	-26.3754	-197.164	24.9295	13.8393	1.582	931.099	71.7	4.971	295.198	1.362	70.265	9.486	298.166	1.295	69.675	11.17
2020-12-25 08:00:00	174.083											1.30386	0	6419.61	-13.4504	-25.3674	-188.473	25.2545	14.4669													6326.67	-13.5486	-25.5513	-190.798	25.3022	13.6128	2.243	931.034	66.893	5.515	302.502	1.638	67.11	10.278	300.06	1.363	67.847	12.93
2020-12-25 09:00:00	210.816											2.55931	0	6140.8	-13.1045	-24.7272	-182.521	29.077	15.2967													6081.35	-13.2689	-25.0305	-186.652	26.5269	13.5918	2.997	930.756	57.453	5.953	301.854	2.16	58.005	10.332	300.449	1.787	58.623	12.024
2020-12-25 10:00:00	44.4301											5.21889	0	5862	-12.7586	-24.087	-176.57	32.8994	16.1266													5692.42	-13.3553	-25.1979	-187.545	29.6859	14.0378	4.01	930.766	49.397	5.821	313.131	2.952	50.143	10.13	308.967	2.508	50.473	11.986
2020-12-25 11:00:00	8.52923											6.03434	0	5796.49	-12.6446	-23.8762	-175.158	34.3112	15.852													5303.48	-13.4416	-25.3653	-188.438	32.8448	14.4837	4.325	930.432	47.137	5.11	309.481	3.192	48.087	8.615	307.389	2.72	48.49	9.966
2020-12-25 12:00:00	7.57986											5.69839	0	5782.36	-12.5865	-23.7688	-174.839	35.1424	15.3113													5011.1	-13.4807	-25.4417	-188.797	34.6761	14.7371	4.253	930.371	46.895	6.299	308.934	3.225	47.653	10.454	307.237	2.76	48.095	12.246
2020-12-25 13:00:00	8.44978											5.33584	0	5768.23	-12.5283	-23.6615	-174.521	35.9737	14.7707													4937.17	-13.4127	-25.3124	-187.944	33.5034	14.5549	3.543	930.013	52.003	6.861	311.721	2.608	53.093	11.769	312.636	2.188	53.828	13.649
2020-12-25 14:00:00	10.5159											4.10702	0	5505.84	-12.6753	-23.9343	-176.61	34.623	14.8641													4863.24	-13.3447	-25.1831	-187.092	32.3307	14.3726	3.482	928.856	47.215	6.992	312.909	2.728	47.482	12.382	312.682	2.358	47.582	14.272
2020-12-25 15:00:00	11.2257											2.76233	0	5183.89	-12.8716	-24.2983	-179.277	32.7487	15.1097													4751.23	-13.3775	-25.2423	-187.695	31.2053	14.2427	3.09	927.549	47.182	7.102	325.328	2.568	46.927	12.131	321.996	2.273	47.01	14.316
2020-12-25 16:00:00	1.54624											2.20781	0	4861.93	-13.0679	-24.6623	-181.943	30.8744	15.3553													4552.96	-13.6385	-25.7286	-191.597	30.1871	14.2315	2.99	926.892	43.835	5.337	334.061	2.593	43.05	8.641	331.482	2.345	42.713	9.922
2020-12-25 17:00:00	-0.392266											1.83705	0	4824.35	-13.2301	-24.9613	-184.649	28.4765	15.0415													4354.69	-13.8994	-26.2148	-195.499	29.1689	14.2202	2.847	927.06	43.588	4.584	339.251	2.5	42.772	7.675	332.571	2.273	42.315	8.904
2020-12-25 18:00:00	-0.37776											1.45926	0	4855.12	-13.384	-25.2447	-187.364	25.9528	14.5932													4273.07	-14.0712	-26.5356	-198.242	28.8809	14.0432	2.608	927.608	45.597	5.094	329.71	2.262	44.982	8.884	326.714	2.022	44.783	10.65
2020-12-25 19:00:00	-0.355083											1.26516	0	4885.89	-13.5379	-25.5281	-190.08	23.429	14.145													4455.58	-14.041	-26.4817	-198.362	30.2461	13.4911	2.323	927.881	49.147	5.728	337.721	2.032	48.198	10.16	334.911	1.828	48.023	11.879
2020-12-25 20:00:00	-0.360934											1.20973	0	4889.24	-13.5562	-25.5615	-190.668	23.0235	13.8241													4638.08	-14.0108	-26.4277	-198.483	31.6114	12.939	2.28	928.413	50.028	6.526	320.357	1.943	49.36	11.441	318.08	1.737	49.343	13.291
2020-12-25 21:00:00	-0.519562											0.598892	0	4886.02	-13.5419	-25.535	-190.746	23.1264	13.5338													4755.12	-13.9776	-26.365	-198.341	31.3077	12.5785	1.952	928.975	51.405	6.876	330.796	1.727	50.267	12.193	329.127	1.562	49.913	14.318
2020-12-25 22:00:00												0.37691	0	4882.8	-13.5276	-25.5085	-190.825	23.2293	13.2435													4724.18	-13.9375	-26.2825	-197.609	27.2306	12.6514	1.768	929.385	51.155	6.524	328.906	1.558	49.92	12.023	326.817	1.427	49.355	13.964
2020-12-25 23:00:00												0.086992	0	4835.65	-13.5809	-25.6098	-191.571	24.1465	13.3074													4693.23	-13.8974	-26.2	-196.876	23.1536	12.7243	1.395	929.736	52.573	6.836	320.997	1.178	51.43	12.83	321.712	1.055	50.895	15.147
2020-12-26												-0.070368	0	4777.97	-13.6503	-25.7418	-192.478	25.2588	13.4561													4643.5	-13.9079	-26.2135	-196.881	19.8132	12.8265	1.283	930.178	52.297	6.639	312.724	1.108	50.93	12.262	319.288	0.998	50.345	14.984
2020-12-26 01:00:00												-0.010397	0	4720.3	-13.7198	-25.8737	-193.385	26.3711	13.6049													4551.29	-14.0328	-26.444	-198.557	18.1392	12.9952	1.42	930.377	50.443	7.246	318.864	1.253	49.182	13.527	317.514	1.12	48.587	15.916
2020-12-26 02:00:00	-0.134414											-0.400084	0	4679.66	-13.7406	-25.9128	-193.542	26.4402	13.7605													4459.07	-14.1578	-26.6746	-200.233	16.4651	13.1639	1.247	930.917	50.262	6.831	319.255	1.165	48.718	12.11	319.076	1.017	48.235	13.751
2020-12-26 03:00:00	-0.245519											-0.564906	0	4643.11	-13.7497	-25.9296	-193.519	26.2593	13.9178													4399.49	-14.2262	-26.8018	-201.084	16.0529	13.3303	0.798	931.401	51.853	5.557	316.632	0.775	49.777	9.719	312.342	0.935	47.598	10.525
2020-12-26 04:00:00	-0.292603											-0.595059	0	4606.56	-13.7589	-25.9464	-193.496	26.0784	14.0751													4413.69	-14.1669	-26.6955	-200.072	18.4934	13.4919	0.685	932.193	52.19	6.864	325.885	0.65	50.243	12.436	322.667	0.965	47.195	13.697
2020-12-26 05:00:00	-0.320381											-0.749824	0	4560.33	-13.7526	-25.935	-193.223	26.3517	14.2575													4427.88	-14.1076	-26.5891	-199.059	20.9338	13.6534	0.475	932.365	53.117	7.707	331.105	0.352	51.537	14	328.757	0.362	50.355	15.607
2020-12-26 06:00:00	-0.154287											-1.19616	0	4511.78	-13.7425	-25.9169	-192.889	26.7339	14.4459													4410.59	-14.0611	-26.5055	-198.171	22.7398	13.8733	-0.14	932.224	55.775	7.463	319.638	-0.218	54.045	14.227	320.399	-0.143	52.413	16.392
2020-12-26 07:00:00	36.0367											-1.35847	0	4463.23	-13.7324	-25.8987	-192.556	27.116	14.6343													4322.13	-14.0436	-26.4733	-197.562	23.1115	14.2251	-0.118	932.494	53.36	6.202	308.739	-0.18	51.355	12.363	309.9	-0.08	49.51	14.269
2020-12-26 08:00:00	58.2939											-0.197103	0	4459.92	-13.6948	-25.8265	-191.181	26.1208	15.4304													4233.66	-14.026	-26.4412	-196.952	23.4831	14.5768	0.93	933.1	48.982	5.062	302.429	0.32	48.8	9.398	307.051	0.173	47.852	11.275
2020-12-26 09:00:00	94.3092											1.79488	0	4467.43	-13.6505	-25.7413	-189.558	24.7962	16.3719													4175.91	-13.9895	-26.3745	-195.981	24.3336	15.0153	2.375	934.259	44.747	5.506	315.905	1.385	45.573	10.21	318.652	1.062	45.085	12.245
2020-12-26 10:00:00	372.096											5.48524	0	4474.94	-13.6063	-25.6561	-187.935	23.4716	17.3133													4187.6	-13.9103	-26.2299	-194.19	26.267	15.6499	4.023	934.872	40.158	4.412	313.828	2.8	41.362	7.508	313.479	2.368	40.943	8.929
2020-12-26 11:00:00	329.22											6.81153	0	4512.64	-13.3993	-25.2718	-184.49	25.1217	17.6845													4199.28	-13.8311	-26.0854	-192.398	28.2003	16.2846	4.922	935.485	37.693	4.541	309.96	3.677	38.877	7.885	309.905	3.202	38.685	9.081
2020-12-26 12:00:00	314.438											6.95663	0	4557.57	-13.1533	-24.8158	-180.607	27.484	17.9191													4218.6	-13.7015	-25.8439	-190.058	28.7896	16.6933	5.262	935.943	38.403	4.489	311.878	4.08	39.23	7.53	307.597	3.677	38.565	8.31
2020-12-26 13:00:00	200.736											5.82962	0	4602.5	-12.9074	-24.3599	-176.725	29.8464	18.1538													4255.14	-13.458	-25.3838	-186.478	26.348	16.5925	4.912	935.915	37.655	4.477	298.718	3.99	38.067	7.156	295.442	3.622	37.537	7.821
2020-12-26 14:00:00	90.0201											3.74447	0	4563.11	-12.798	-24.1544	-175.613	29.4333	17.6223													4291.68	-13.2146	-24.9238	-182.899	23.9065	16.4916	3.697	935.695	41.678	4.636	312.622	3.085	41.407	7.948	315.858	2.803	40.83	8.945
2020-12-26 15:00:00	31.2284											1.50174	0	4503.54	-12.7213	-24.0089	-175.164	28.3559	16.9074													4293.97	-13.0504	-24.6154	-180.53	23.2409	16.3929	2.263	935.497	46.025	4.045	298.975	2.282	43.347	7.036	300.878	2.212	41.68	7.723
2020-12-26 16:00:00	0.634416											-0.575165	0	4443.97	-12.6447	-23.8634	-174.715	27.2785	16.1925													4218.82	-13.0655	-24.6499	-180.9	26.5899	16.299	0.525	935.233	51.87	2.701	293.668	1.092	46.883	5.265	301.102	1.593	42.212	5.87
2020-12-26 17:00:00	-0.331986											-2.22466	0	4391.35	-12.6249	-23.8315	-174.6	30.0978	16.0519													4143.68	-13.0806	-24.6843	-181.269	29.939	16.2051	0	935.596	51.51	3.798	291.986	0.702	46.542	6.255	294.357	1.213	43.187	6.323
2020-12-26 18:00:00	-0.28955											-2.76894	0	4340.4	-12.6186	-23.8267	-174.565	33.8477	16.0484													4075.43	-13.0972	-24.72	-181.581	32.44	16.1792	-0.333	935.703	52.23	2.527	324.022	0.432	46.402	4.485	322.297	0.828	43.017	4.033
2020-12-26 19:00:00	-0.379217											-3.69889	0	4289.44	-12.6124	-23.822	-174.531	37.5975	16.0449													4022.78	-13.1172	-24.7586	-181.762	33.0265	16.3066	-0.218	935.582	49.825	2.922	300.401	0.278	46.322	3.842	308.555	0.727	42.235	3.216
2020-12-26 20:00:00	-0.334878											-3.96684	0	4252.38	-12.6174	-23.8297	-174.276	36.6984	16.3623													3970.13	-13.1373	-24.7972	-181.943	33.613	16.434	-0.613	935.786	50.457	2.282	346.528	0.245	45.312	3.031	341.362	0.542	42.7	3.156
2020-12-26 21:00:00	0.242615											-4.43968	0	4218.65	-12.6252	-23.8405	-173.967	34.6842	16.7568													3937.88	-13.1442	-24.8111	-182.016	34.1608	16.4728	-0.915	935.836	53.07	2.563	327.977	-0.29	49.583	3.036	329.08	0.378	44.988	2.599
2020-12-26 22:00:00												-4.53542	0	4184.91	-12.6329	-23.8513	-173.659	32.6701	17.1513													3951.67	-13.1214	-24.7693	-181.842	34.6215	16.3116	-0.267	935.994	47.385	1.553	352.016	0.358	44.387	1.449	40.431	0.747	41.723	1.173
2020-12-26 23:00:00												-4.65994	0	4143.56	-12.6981	-23.9768	-174.347	34.5619	17.4674													3965.46	-13.0986	-24.7274	-181.669	35.0821	16.1503	-0.688	936.026	51.543	1.732	325.714	-0.382	49.573	1.664	349.62	0.103	45.978	1.325
2020-12-27												-4.80167	0	4100.38	-12.777	-24.1297	-175.273	37.3879	17.7648													3946.17	-13.1161	-24.7608	-181.82	35.4345	16.2665	-0.378	935.744	49.252	1.312	41.112	0.127	46.233	1.722	54.805	0.975	40.452	2.274
2020-12-27 01:00:00												-4.68638	0	4057.2	-12.8559	-24.2827	-176.199	40.2139	18.0622													3852.15	-13.2246	-24.9642	-182.704	35.5424	17.0095	-0.698	935.495	49.743	1.84	328.115	0.892	38.663	1.444	3.559	2.08	30.92	2.401
2020-12-27 02:00:00	-0.241983											-5.48962	0	4019.53	-12.9594	-24.4781	-176.854	41.1244	18.9708													3758.13	-13.3332	-25.1675	-183.588	35.6502	17.7525	-1.655	934.827	53.012	1.736	26.562	0.487	40.357	1.743	47.305	1.94	34.008	1.75
2020-12-27 03:00:00	-0.299169											-5.30625	0	3983.17	-13.0688	-24.6838	-177.444	41.576	20.0258													3660.42	-13.5386	-25.5504	-185.932	34.9598	18.4713	-1.163	934.407	49.67	1.656	27.83	0.682	38.53	1.927	32.105	1.457	36.637	2.207
2020-12-27 04:00:00	-0.077776											-5.11726	0	3946.82	-13.1783	-24.8894	-178.035	42.0276	21.0808													3554.36	-13.9628	-26.3391	-191.578	32.4657	19.1351	-0.264	934.034	43.735	0.676	146.945	1.173	37.743	1.878	40.363	1.845	34.48	3.196
2020-12-27 05:00:00	-0.123453											-4.90912	0	3979.55	-13.343	-25.1985	-179.578	42.4383	22.01													3448.3	-14.387	-27.1278	-197.224	29.9716	19.7989	0.125	933.4	41.58	1.026	14.676	1.675	34.885	2.964	39.115	1.888	33.393	4.425
2020-12-27 06:00:00	0.313215											-4.51841	0	4028.81	-13.521	-25.5322	-181.349	42.8392	22.909													3379.09	-14.6901	-27.6917	-201.13	28.3947	20.4028	1.442	932.54	36.187	0.931	39.278	2.405	32.222	2.839	46.748	2.465	30.605	4.554
2020-12-27 07:00:00	24.3129											-3.50551	0	4078.08	-13.699	-25.866	-183.12	43.2401	23.808													3393.1	-14.7195	-27.7476	-201.11	28.8896	20.8713	0.141	931.889	40.688	1.512	58.552	1.847	33.452	3.621	46.756	2.352	30.345	4.586
2020-12-27 08:00:00	83.0245											-2.12528	0	4203.66	-13.6579	-25.7904	-181.558	43.9351	24.7651													3407.11	-14.749	-27.8036	-201.089	29.3844	21.3398	0.86	931.357	37.932	0.876	10.77	1.832	33.558	2.77	43.856	2.28	30.103	4.436
2020-12-27 09:00:00	156.313											0.686844	0	4347.53	-13.5644	-25.6168	-179.198	44.7005	25.736													3450.94	-14.7357	-27.7791	-200.397	29.6046	21.8362	1.377	930.883	44.008	1.388	64.075	2.155	32.443	3.092	48.166	2.627	27.527	4.621
2020-12-27 10:00:00	136.07											2.48567	0	4491.39	-13.4708	-25.4431	-176.838	45.4659	26.7069													3562.06	-14.6259	-27.5732	-198.19	29.2051	22.3957	2.25	930.538	41.138	1.32	63.686	2.247	32.93	3.463	49.726	2.353	27.84	5.083
2020-12-27 11:00:00	267.122											4.61807	0	4443.63	-13.4828	-25.4593	-177.547	42.0271	26.1268													3673.18	-14.5162	-27.3673	-195.983	28.8055	22.9551	3.858	930.112	34.88	2.066	50.928	3.083	31.747	4.197	45.568	2.888	27.962	5.508
2020-12-27 12:00:00	232.87											6.04115	0	4350.06	-13.5201	-25.5208	-178.99	37.5834	25.176													3803.56	-14.3344	-27.0273	-193.143	28.7096	23.0753	4.413	929.639	36.082	1.947	56.872	3.582	34.528	2.844	54.044	3.252	29.157	3.195
2020-12-27 13:00:00	120.255											4.72306	0	4256.5	-13.5574	-25.5823	-180.433	33.1397	24.2252													3977.39	-13.9902	-26.3847	-188.873	29.2985	22.2046	3.815	928.737	36.408	1.888	100.21	3.108	36.62	2.134	91.873	2.772	35.858	2.597
2020-12-27 14:00:00	68.4027											3.70242	0	4503.78	-13.1337	-24.787	-175.507	31.9977	22.7886													4151.21	-13.6461	-25.7422	-184.603	29.8874	21.3339	3.26	927.299	40.962	1.469	127.916	2.608	40.835	1.939	127.881	2.377	38.683	2.299
2020-12-27 15:00:00	17.3788											2.49521	0	4832.56	-12.5998	-23.7868	-169.058	31.6452	21.2359													4351.31	-13.2521	-25.0054	-179.368	30.1634	20.6759	2.482	925.993	47.275	1.157	167.129	2.127	45.065	1.708	166.437	1.925	43.455	2.192
2020-12-27 16:00:00	-0.227237											1.06668	0	5161.33	-12.0659	-22.7866	-162.609	31.2927	19.6832													4610.67	-12.7456	-24.0563	-171.953	29.7338	20.4977	1.72	925.043	52.053	0.947	112.814	1.437	51.53	1.594	130.117	1.282	52.517	1.811
2020-12-27 17:00:00	-0.327694											0.728488	0	5391.33	-11.6828	-22.0656	-156.574	29.5913	19.9509													4870.03	-12.2391	-23.1072	-164.538	29.3042	20.3194	1.318	924.227	55.697	1.395	107.279	1.243	54.518	2.571	128.157	1.335	57.672	3.222
2020-12-27 18:00:00	-0.122017											1.53477	0	5597.75	-11.3358	-21.4114	-150.638	27.5678	20.6532													5330.4	-11.6128	-21.9341	-155.414	29.6355	20.0595	1.667	923.549	56.135	2.826	37.802	1.347	56.047	4.484	47.616	1.327	56.917	4.649
2020-12-27 19:00:00	-0.086064											1.73072	0	5804.17	-10.9888	-20.7571	-144.701	25.5444	21.3554													6244.12	-10.7162	-20.256	-142.432	31.6831	19.6155	1.975	922.361	60.72	3.217	56.227	1.61	61.882	5.461	55.271	1.483	65.322	6.547
2020-12-27 20:00:00	-0.131356											2.11265	0	6899.05	-10.2443	-19.3684	-133.89	30.2321	21.0566													7157.84	-9.81966	-18.5778	-129.451	33.7306	19.1715	2.413	920.977	76.692	3.415	61.929	2.173	78.623	5.651	62.962	2.107	84.583	6.442
2020-12-27 21:00:00	-0.571442											2.14424	0.745782	8206.05	-9.40502	-17.8043	-121.916	36.522	20.5187													8166.47	-9.02184	-17.0833	-118.349	35.2847	18.3177		919.679	98.982	3.456	63.083	2.045	97.025	5.893	67.576		99.802	6.557
2020-12-27 22:00:00												2.68278	0.186445	9513.04	-8.5657	-16.2403	-109.941	42.8119	19.9809													9389.17	-8.44671	-16.0031	-111.485	35.7258	16.5398		918.264	99.9	3.495	58.922		99.9	6.234	64.853		99.9	6.548
2020-12-27 23:00:00												3.45604	0.372891	10153.1	-8.3012	-15.7439	-106.629	43.0646	19.3227													10611.9	-7.87159	-14.9229	-104.621	36.167	14.7618		916.859	99.9	3.736	69.843		99.9	5.948	76.718		99.9	7.027
2020-12-28												3.87892	0.559336	10633.9	-8.17402	-15.5026	-105.385	41.8751	18.6359													11535.5	-7.49008	-14.2059	-100.122	36.1901	13.5248		914.906	99.9	3.708	90.748		99.9	6.059	99.804		99.9	7.419
2020-12-28 01:00:00												4.1474	0.932227	11114.7	-8.04684	-15.2613	-104.142	40.6857	17.949													11783.8	-7.54576	-14.3089	-100.962	35.2691	13.5089		913.37	99.9	2.631	87.954		99.9	4.512	98.876		99.9	5.524
2020-12-28 02:00:00	0.371154											4.29668	1.67801	11007.5	-8.11634	-15.3888	-105.574	38.9822	17.536													12032.2	-7.60145	-14.4119	-101.802	34.348	13.493		911.385	99.9	2.929	79.111		99.9	5.056	83.01		99.9	5.664
2020-12-28 03:00:00	0.226071											3.9096	0	10759.6	-8.23291	-15.6045	-107.648	37.1558	17.1884													12113.9	-7.69769	-14.5891	-103.55	32.3189	13.1625		910.038	99.9	2.035	304.962	4.329	99.07	3.059	274.649	4.38	99.687	3.283
2020-12-28 04:00:00	0.199827											2.96828	0	10511.7	-8.34947	-15.8203	-109.721	35.3294	16.8409													11819.3	-7.88553	-14.9337	-107.348	27.7874	12.1216		908.379	99.9	2.042	310.103	4.06	97.6	4.002	300.665	4.406	98.825	4.057
2020-12-28 05:00:00	0.223229											3.07634	0	10182.9	-9.06985	-17.1738	-120.624	35.8972	16.7667													11524.8	-8.07336	-15.2784	-111.146	23.2559	11.0807	3.422	907.543	98.34	0.786	308.109	3.765	96.418	0.93	178.445	2.882	98.815	1.407
2020-12-28 06:00:00	0.064947											2.5749	0	9834.72	-9.93482	-18.7999	-133.641	37.0383	16.758													11211.5	-8.43141	-15.948	-116.936	21.6309	10.6482	2.622	906.36	97.752	3.059	233.921	2.152	96.26	4.906	227.17		99.898	5.918
2020-12-28 07:00:00	4.79749											2.40897	0	9486.56	-10.7998	-20.4259	-146.658	38.1795	16.7493													10856	-9.17402	-17.352	-127.226	26.5718	11.5898	2.662	905.999	93.215	2.217	297.15	2.237	92.238	3.818	282.008	2.1	96.713	5.03
2020-12-28 08:00:00	22.9582											2.7657	0	9396.83	-10.9127	-20.6369	-148.281	37.6355	16.8141													10500.5	-9.91664	-18.756	-137.516	31.5127	12.5315	2.87	906.121	92.228	2.591	293.399	2.408	91.537	4.819	279.286	2.165	96.288	6.504
2020-12-28 09:00:00	109.796											3.55472	0	9368.85	-10.8458	-20.5098	-147.182	36.6887	16.8964													10140	-10.4117	-19.6924	-144.079	35.0486	13.4599	3.23	907.008	89.045	4.074	272.497	2.617	89.123	7.052	272.556	2.293	93.152	9.084
2020-12-28 10:00:00	187.991											4.22403	0	9340.88	-10.7789	-20.3826	-146.082	35.742	16.9788													9768.61	-10.3483	-19.5741	-142.234	35.4155	14.3585	3.702	907.301	81.895	3.374	279.163	2.945	82.522	5.496	276.075	2.597	85.247	6.674
2020-12-28 11:00:00	323.898											5.65966	0	9039.86	-10.606	-20.0578	-143.151	35.5592	17.3115													9397.18	-10.2849	-19.4559	-140.39	35.7824	15.2571	4.115	907.657	80.618	3.226	259.747	3.093	82.567	4.996	261.119	2.682	85.905	5.808
2020-12-28 12:00:00	260.231											6.05311	0	8673.63	-10.4077	-19.6858	-139.782	35.559	17.7039													9015.94	-10.1996	-19.296	-138.619	35.8902	15.7492	4.752	908.027	69.698	3.488	250.752	3.712	71.518	5.338	249.85	3.275	73.365	5.747
2020-12-28 13:00:00	214.85											5.79497	0	8307.39	-10.2094	-19.3137	-136.414	35.5587	18.0963													8612.59	-10.065	-19.0424	-137.014	35.4139	15.3248	4.677	908.127	67.737	3.971	259.56	3.743	69.113	6.104	258.726	3.358	70.407	6.796
2020-12-28 14:00:00	135.794											5.36094	0	8029.5	-10.1785	-19.2578	-136.122	36.6271	17.9399													8209.25	-9.93035	-18.7888	-135.41	34.9376	14.9004	4.56	907.97	66.803	4.168	245.412	3.748	68.28	6.449	246.753	3.4	69.72	7.124
2020-12-28 15:00:00	35.2044											3.51605	0	7772.67	-10.1875	-19.2772	-136.565	37.9504	17.6525													7950.47	-9.83779	-18.6136	-134.341	34.1802	14.568	4.152	908.368	67.452	3.128	246.905	3.645	67.868	4.864	246.202	3.34	69.008	5.25
2020-12-28 16:00:00	1.11101											0.843521	0	7515.85	-10.1966	-19.2966	-137.008	39.2737	17.3652													8017.17	-9.83995	-18.615	-134.478	32.7902	14.4427	3.042	908.756	73.137	2.121	229.733	3.238	71.068	3.81	228.473	3.135	71.885	4.642
2020-12-28 17:00:00	-0.117468											1.07625	0	7821.44	-10.6106	-20.0678	-143.038	36.7188	17.5047													8083.88	-9.84211	-18.6165	-134.614	31.4001	14.3174	2.9	909.752	76.248	1.569	214.296	3.048	73.742	2.785	215.19	3.015	73.97	3.703
2020-12-28 18:00:00	0.117494											2.56887	0	8260.95	-11.121	-21.0181	-150.399	33.2405	17.7457													8269.98	-10.1701	-19.2291	-139.355	30.2142	14.4779	3.097	910.275	77.998	2.463	237.54	2.842	77.085	4.568	228.877	2.607	79.17	5.724
2020-12-28 19:00:00	-0.045166											1.87795	2.23735	8700.46	-11.6314	-21.9683	-157.759	29.7621	17.9867													8725.08	-11.2323	-21.2188	-154.468	29.4885	15.2823	2.617	911.118	97.218	2.565	223.14	1.759	95.54	4.09	218.926	1.988	97.893	4.794
2020-12-28 20:00:00	0.080525											1.67786	0.745782	9019.48	-11.9409	-22.5472	-162.927	29.0167	17.4507													9180.18	-12.2944	-23.2084	-169.581	28.7628	16.0866		911.772	99.9	4.946	246.308		99.9	8.368	245.651		99.9	9.284
2020-12-28 21:00:00	-0.069046											2.50488	0	9309.81	-12.2026	-23.0377	-167.572	28.9222	16.7296													9520.88	-12.9158	-24.3706	-178.95	27.1504	16.0142		911.753	99.9	3.339	258.849	2.167	99.503	5.671	257.694		99.9	7.04
2020-12-28 22:00:00												2.68177	0	9600.13	-12.4643	-23.5282	-172.217	28.8277	16.0084													9604.25	-12.5461	-23.6714	-175.402	23.5437	13.9699	2.871	912.534	97.528	3.304	257.083	2.435	95.088	5.221	253.54	2.23	99.362	6.006
2020-12-28 23:00:00												2.53253	0	9609.31	-12.4459	-23.4937	-172.342	28.6697	15.6077													9687.63	-12.1764	-22.9723	-171.853	19.937	11.9255	2.715	912.931	97.655	5.17	256.473	2.338	94.242	7.914	258.704	2.198	98.657	8.604
2020-12-29												2.74389	0	9551.5	-12.3608	-23.334	-171.389	28.4966	15.2833													9767.13	-11.8253	-22.3074	-168.683	16.0221	9.77652	2.6	913.229	99.725	2.642	253.73	2.223	96.28	4.978	249.823		99.9	6.717
2020-12-29 01:00:00												2.69406	0	9493.7	-12.2758	-23.1744	-170.436	28.3235	14.9588													9837.95	-11.516	-21.7192	-166.362	11.4143	7.39233	2.397	913.565	98.77	0.841	221.258	2.078	93.778	1.553	216.971	1.837	98.328	2.198
2020-12-29 02:00:00	-0.002005											2.53938	0	9454.98	-12.2065	-23.0444	-169.556	28.1828	14.7987													9908.76	-11.2068	-21.1311	-164.041	6.80647	5.00815	2.413	914.057	92.127	1.009	222.932	2.082	89.135	1.764	220.967	1.842	92.837	2.212
2020-12-29 03:00:00	-0.023637											2.51786	0	9420.8	-12.141	-22.9214	-168.694	28.0499	14.6778													9966.49	-11.0783	-20.8869	-163.382	4.94259	3.71315	2.344	914.376	99.007	1.1	263.48	1.852	94.573	1.749	257.685	1.709	97.988	2.204
2020-12-29 04:00:00	-0.084918											2.55183	0.186445	9386.63	-12.0755	-22.7985	-167.831	27.9169	14.5568													9994.76	-11.3568	-21.4169	-166.465	9.25565	4.87005		914.736	99.9	0.622	158.014	1.79	96.312	1.158	161.302		99.9	0.906
2020-12-29 05:00:00	-0.23022											2.37723	0	9210.45	-12.4104	-23.4257	-172.545	28.0259	14.8609													10023	-11.6353	-21.9468	-169.548	13.5687	6.02695		915.342	99.9	0.672	192.594	1.52	96.978	1.561	189.468		99.9	2.041
2020-12-29 06:00:00	-0.101989											1.92135	0	9000.42	-12.8407	-24.2318	-178.588	28.1926	15.2663													10010.4	-11.8688	-22.3883	-172.314	15.5781	6.79257		915.596	99.9	1.512	231.307	1.33	96.847	2.42	228.58		99.9	2.801
2020-12-29 07:00:00	13.8046											1.39957	0	8790.39	-13.2711	-25.0378	-184.631	28.3592	15.6717													9905.63	-12.0012	-22.6304	-174.366	12.4024	6.67754		915.992	99.9	3.526	253.744	1.285	95.788	5.628	254.651	1.25	99.855	6.232
2020-12-29 08:00:00	79.2644											1.46778	0	8988.25	-13.219	-24.9404	-183.49	28.4266	16.0333													9800.88	-12.1336	-22.8726	-176.418	9.22678	6.56251		916.378	99.9	1.772	274.377	0.995	98.735	3.578	269.678		99.9	4.055
2020-12-29 09:00:00	109.143											2.91869	0	9283.13	-13.0521	-24.6282	-180.641	28.4703	16.3844													9933.36	-12.1197	-22.8416	-176.599	6.54258	6.13427		916.598	99.9	1.372	1.901	1.223	99.787	2.158	1.992		99.9	2.114
2020-12-29 10:00:00	236.705											4.10967	0	9578	-12.8852	-24.3159	-177.792	28.514	16.7355													10599	-11.7773	-22.197	-172.574	4.9628	5.00215	2.711	916.986	98.033	1.691	30.732	1.6	98.467	2.117	21.933		99.9	1.914
2020-12-29 11:00:00	374.562											6.15276	0	9754.87	-12.667	-23.9077	-174.237	28.7649	17.0243													11264.6	-11.4349	-21.5524	-168.549	3.38303	3.87004	3.912	917.456	88.773	1.437	75.757	3.102	90.993	1.615	71.072	3.033	94.97	1.408
2020-12-29 12:00:00	329.114											7.03986	0	9903.67	-12.4365	-23.4767	-170.515	29.0652	17.2984													11436.6	-11.1844	-21.0847	-164.688	4.36564	3.98956	5.113	918.076	83.732	1.581	173.228	4.108	86.772	1.744	168.393	3.745	90.682	1.664
2020-12-29 13:00:00	313.274											9.09842	0	10052.5	-12.206	-23.0457	-166.793	29.3654	17.5724													10498	-11.1407	-21.0153	-161.197	11.1144	6.92564	6.132	918.375	74.057	1.757	119.966	5.21	75.955	2.174	127.7	4.822	78.505	2.141
2020-12-29 14:00:00	172.246											7.669	0	9668.48	-11.9006	-22.4749	-162.973	30.199	16.8255													9559.38	-11.097	-20.9459	-157.706	17.8632	9.86172	6.407	918.09	63.245	2.016	236.553	5.423	64.952	2.515	236.056	5.043	66.398	2.527
2020-12-29 15:00:00	29.0943											4.40064	0	9157.34	-11.5773	-21.8707	-159.131	31.1598	15.835													8776.64	-11.0782	-20.9202	-155.054	23.045	12.3076	5.222	917.938	65.327	1.96	289.13	4.74	65.63	2.936	279.574	4.455	66.685	3.166
2020-12-29 16:00:00	1.10565											2.40892	0	8646.21	-11.254	-21.2666	-155.288	32.1206	14.8444													8344.65	-11.1153	-20.9929	-154.293	24.7008	13.6505	3.298	917.963	86.272	3.257	266.427	3.335	83.598	5.089	270.147	3.45	80.313	5.921
2020-12-29 17:00:00	-0.245481											0.874967	0	8202.7	-11.1745	-21.1151	-154.134	30.7516	14.7869													7912.67	-11.1524	-21.0655	-153.531	26.3567	14.9934	2.548	918.037	79.252	3.25	279.209	3.37	71.76	5.625	277.415	3.468	70.177	6.918
2020-12-29 18:00:00	-0.196658											0.394281	0	7775.19	-11.1527	-21.0708	-153.616	28.8312	14.9502													7548.89	-11.1562	-21.075	-152.586	27.6365	16.0141	2.563	918.603	75.098	3.56	295.484	3.512	67.055	5.66	300.519	3.5	66.998	6.71
2020-12-29 19:00:00	-0.21654											-0.434936	0	7347.69	-11.131	-21.0264	-153.098	26.9108	15.1135													7338.33	-11.085	-20.9424	-151.228	28.072	16.311	1.91	919.016	77.475	3.669	301.963	2.888	69.578	6.045	302.106	3.25	65.558	6.526
2020-12-29 20:00:00	-0.286999											-0.61433	0	7188.04	-11.1142	-20.9939	-152.444	26.3765	15.508													7127.77	-11.0139	-20.8099	-149.871	28.5074	16.6079	1.862	919.521	75.11	2.488	307.87	3.115	66.388	4.359	300.886	3.23	66.197	5.322
2020-12-29 21:00:00	-0.017548											-0.964668	0	7091.86	-11.0986	-20.9643	-151.757	26.1707	15.9574													6995.34	-10.9702	-20.7291	-149.007	29.0974	16.8257	1.855	919.937	74.517	3.048	301.288	2.633	69.925	5.021	303.184	2.59	70.702	5.617
2020-12-29 22:00:00												-1.11896	0	6995.67	-11.083	-20.9347	-151.071	25.9648	16.4067													7038.3	-10.9882	-20.7645	-149.25	30.034	16.8661	1.637	920.19	77.35	2.558	304.669	2.533	71.352	4.442	304.212	2.537	71.497	4.778
2020-12-29 23:00:00												-1.4249	0	6956.49	-11.1205	-21.009	-151.476	28.085	16.5958													7081.27	-11.0062	-20.8	-149.493	30.9706	16.9065	1.515	920.523	78.04	2.562	301.387	2.172	74.512	3.703	298.709	2.377	74.41	3.984
2020-12-30												-1.67436	0	6930.81	-11.1706	-21.1079	-152.14	30.7562	16.7232													7069.03	-11.0476	-20.8789	-150.06	31.6067	16.9714	0.947	920.956	80.628	2.198	309.102	1.812	77.608	3.244	295.201	2.077	77.997	3.626
2020-12-30 01:00:00												-1.60561	0	6905.13	-11.2208	-21.2069	-152.804	33.4275	16.8506													6933.02	-11.1417	-21.0552	-151.351	31.5689	17.0913	0.738	921.217	79.908	2.462	305.888	1.543	74.942	3.797	296.723	1.855	74.345	4.662
2020-12-30 02:00:00	-0.060657											-1.50859	0	6809.74	-11.2974	-21.3513	-153.876	33.8001	16.9342													6797	-11.2358	-21.2316	-152.641	31.531	17.2112	0.738	921.369	78.358	2.774	304.79	1.728	71.03	4.155	304.267	1.937	69.968	4.567
2020-12-30 03:00:00	-0.031591											-2.23447	0	6697.81	-11.3804	-21.5064	-155.044	33.6271	17.0073													6674.13	-11.3151	-21.3805	-153.727	31.7063	17.317	0.183	921.387	80.063	3.08	311.865	1.517	70.912	4.982	313.912	1.963	68.238	5.452
2020-12-30 04:00:00	-0.271269											-2.09175	0	6585.88	-11.4633	-21.6616	-156.213	33.454	17.0805													6580.76	-11.361	-21.4677	-154.35	32.3595	17.3913	0.185	921.546	80.038	1.678	326.513	1.205	72.028	3.75	309.671	1.698	68.09	4.522
2020-12-30 05:00:00	-0.286879											-2.00776	0	6519.63	-11.4992	-21.7274	-156.418	32.6575	17.402													6487.38	-11.4068	-21.5549	-154.974	33.0126	17.4656	-0.058	921.571	79.367	2.943	305.307	1.103	70.888	4.443	303.201	1.56	66.898	5.327
2020-12-30 06:00:00	-0.144331											-2.27105	0	6464.2	-11.524	-21.7721	-156.394	31.7132	17.7823													6451.51	-11.4211	-21.5835	-155.09	33.9948	17.5778	-0.008	921.638	78.077	3.399	301.798	0.61	74.032	5.307	297.333	0.815	73.398	6.618
2020-12-30 07:00:00	42.8834											-1.82005	0	6408.77	-11.5487	-21.8167	-156.371	30.769	18.1627													6544.67	-11.3644	-21.4803	-154.068	35.7153	17.775	0.202	921.692	77.638	3.098	303.089	0.705	73.69	5.031	299.697	0.867	73.328	6.346
2020-12-30 08:00:00	171.224											-0.21575	0	6703.58	-11.3707	-21.4906	-153.335	34.8641	18.5899													6637.84	-11.3077	-21.3772	-153.045	37.4359	17.9722	1.535	922.081	72.323	3.122	305.118	1.082	71.697	5.333	301.639	1.003	72.392	6.405
2020-12-30 09:00:00	269.893											1.42449	0	7081.44	-11.1447	-21.0766	-149.585	40.1541	19.0282													6697.35	-11.2337	-21.2412	-151.756	38.842	18.1731	2.195	922.631	73.08	2.552	301.824	1.252	75.067	5.2	307.743	0.957	76.592	5.554
2020-12-30 10:00:00	351.032											4.5675	0	7459.29	-10.9187	-20.6627	-145.835	45.4441	19.4665													6681.45	-11.1212	-21.0314	-149.869	39.5435	18.382	3.343	923.221	70.928	2.841	281.179	2.23	73.258	4.355	286.094	1.835	74.903	5.086
2020-12-30 11:00:00	352.681											5.86086	0	7504.38	-10.8368	-20.5105	-144.848	46.1898	19.2357													6665.55	-11.0086	-20.8216	-147.982	40.2449	18.591	4.3	923.6	60.653	4.073	282.98	3.065	62.847	6.32	285.368	2.602	64.352	6.856
2020-12-30 12:00:00	289.318											5.63664	0	7470.57	-10.7891	-20.4204	-144.517	45.858	18.8461													6677.24	-11.148	-21.0833	-149.932	40.6041	18.7346	4.145	923.982	62.847	4.601	290.871	3.045	64.75	7.654	290.44	2.582	66.047	8.512
2020-12-30 13:00:00	217.402											5.29514	0	7436.76	-10.7413	-20.3303	-144.186	45.5263	18.4566													6750.82	-11.8526	-22.4026	-160.489	40.1952	18.7316	3.527	924.014	69.463	4.62	289.352	2.508	71.877	7.542	289.919	2.078	73.853	8.562
2020-12-30 14:00:00	107.225											3.22994	0	7145.2	-11.6001	-21.9331	-157.043	42.5093	18.4213													6824.4	-12.5573	-23.7219	-171.046	39.7864	18.7286	2.543	924.059	72.285	5.221	296.36	1.845	73.235	9.273	297.665	1.547	74.493	10.702
2020-12-30 15:00:00	38.6897											1.45541	0	6792.84	-12.6727	-23.9352	-173.012	38.8589	18.4696													6769.44	-13.2036	-24.9305	-180.796	38.8926	18.6483	2.093	924.081	67.71	5.785	296.672	1.617	67.563	9.857	296.489	1.382	68.002	11.322
2020-12-30 16:00:00	0.915321											0.1891	0	6440.47	-13.7453	-25.9373	-188.981	35.2085	18.5179													6426.8	-13.7193	-25.8916	-188.737	36.9135	18.395	1.332	924.258	69.065	4.753	299.291	1.172	67.757	8.75	302.22	1.05	67.813	10.319
2020-12-30 17:00:00	-0.288493											-0.233563	0	6194.69	-14.0492	-26.5047	-193.589	34.4351	18.4489													6084.16	-14.235	-26.8526	-196.679	34.9344	18.1417	1.118	924.847	67.337	5.707	306.677	0.972	65.893	10.296	305.486	0.853	65.82	12.536
2020-12-30 18:00:00	-0.320805											-0.655825	0	5974.05	-14.1717	-26.7336	-195.516	34.3403	18.3523													5801.7	-14.5968	-27.5264	-202.251	33.3591	17.9609	0.885	925.354	65.187	5.124	311.961	0.843	63.34	9.295	309.125	0.757	63.12	11.574
2020-12-30 19:00:00	-0.307198											-0.983961	0	5753.41	-14.2942	-26.9625	-197.444	34.2456	18.2557													5653.59	-14.6149	-27.559	-202.53	32.6855	17.9418	0.497	925.641	65.952	4.402	306.251	0.603	63.24	7.764	307.994	0.59	62.502	9.537
2020-12-30 20:00:00	-0.318787											-1.14253	0	5613.26	-14.3619	-27.0898	-198.495	34.6803	18.2237													5505.49	-14.6329	-27.5916	-202.81	32.0118	17.9228	0.143	926.875	66.345	4.636	309.921	0.365	62.978	8.564	311.676	0.428	61.655	9.635
2020-12-30 21:00:00	0.016785											-1.5459	0	5492.05	-14.4166	-27.1932	-199.339	35.2395	18.207													5373.53	-14.6496	-27.6219	-203.111	31.593	17.8642	0.033	927.408	64.928	4.389	294.09	0.357	61.312	8.132	301.77	0.298	60.928	9.72
2020-12-30 22:00:00												-1.77283	0	5370.84	-14.4714	-27.2966	-200.183	35.7987	18.1903													5277.62	-14.663	-27.6473	-203.461	31.7431	17.7174	-0.272	927.767	65.247	4.255	295.876	0.108	61.26	7.396	299.255	0.237	59.878	8.784
2020-12-30 23:00:00												-2.15387	0	5291.07	-14.4679	-27.2927	-200.255	37.2461	18.0869													5181.72	-14.6764	-27.6726	-203.81	31.8931	17.5706	-0.655	928.148	66.215	4.326	309.204	-0.212	61.955	7.968	311.441	-0.163	61.132	8.953
2020-12-31												-2.84918	0	5221.05	-14.4507	-27.2636	-200.146	38.9026	17.963													5086.22	-14.7005	-27.7198	-204.292	33.0116	17.4661	-1.002	928.362	67.068	4.028	307.096	-0.685	63.782	7.909	307.684	-0.546	62.645	8.473
2020-12-31 01:00:00												-2.74401	0	5151.04	-14.4335	-27.2345	-200.037	40.5591	17.8392													4991.62	-14.7487	-27.8158	-205.07	36.2938	17.4562	-1.188	928.55	67.278	3.099	329.585	-0.616	62.48	5.711	318.376	-0.257	58.817	7.092
2020-12-31 02:00:00	-0.250555											-3.44098	0	5117.46	-14.3211	-27.0248	-198.765	40.8148	17.433													4897.02	-14.7968	-27.9118	-205.848	39.5759	17.4463	-1.121	928.796	64.532	3.444	297.552	-0.481	59.027	6.808	296.882	-0.128	55.077	7.347
2020-12-31 03:00:00	-0.304741											-4.27741	0	5092.48	-14.1862	-26.7725	-197.22	40.7402	16.9602													4824.46	-14.8005	-27.9224	-205.929	41.6178	17.4504	-1.307	928.77	68.227	2.118	324.519	-1.263	66.388	3.056	312.916	-0.592	57.04	4.029
2020-12-31 04:00:00	-0.306793											-4.42936	0	5067.5	-14.0514	-26.5203	-195.675	40.6656	16.4875													4801.17	-14.7047	-27.742	-204.451	40.8866	17.4855	-1.53	929.038	71.973	1.37	16.4	-1.212	64.838	1.663	20.807	-0.848	59.695	2.541
2020-12-31 05:00:00	-0.197303											-4.15	0	5181.59	-13.9959	-26.4154	-193.885	40.0684	17.4379													4777.89	-14.6089	-27.5616	-202.972	40.1554	17.5206	-1.008	929.328	62.665	1.285	11.389	-0.563	58.068	1.396	359.088	-0.337	56.248	1.648
2020-12-31 06:00:00	0.161409											-3.88582	0	5328.49	-13.9591	-26.3453	-192.038	39.3478	18.7242													4918.08	-14.4415	-27.2489	-200.451	40.3369	17.54	-1.56	929.26	65.767	1.734	330.623	-0.288	57.318	1.798	333.925	0.025	55.877	2.863
2020-12-31 07:00:00	18.3599											-2.41034	0	5475.39	-13.9223	-26.2752	-190.191	38.6273	20.0105													5423.47	-14.1139	-26.6405	-195.6	42.5575	17.5244	-1.489	929.039	70.113	1.337	355.515	-0.611	62.003	2.615	314.322	-0.03	59.567	3.421
2020-12-31 08:00:00	61.1856											-0.544802	0	5934.6	-13.6659	-25.7959	-186.747	38.9186	19.6204													5928.87	-13.7864	-26.0321	-190.748	44.7781	17.5088	-1.288	929.148	81.095	1.032	40.69	-1.144	77.527	0.97	12.095	-0.837	84.98	1.684
2020-12-31 09:00:00	80.9021											-0.542728	0	6467.35	-13.3577	-25.2203	-182.927	39.4481	18.8355													6403.93	-13.4239	-25.3565	-185.49	46.1946	17.362	-1.95	929.508	96.99	0.705	85.327	-2.597	93.847	0.875	58.094	-1.773	97.88	1.548
2020-12-31 10:00:00	132.008											-0.038008	0	7000.1	-13.0495	-24.6446	-179.106	39.9776	18.0506													6811.24	-12.9831	-24.5307	-179.324	45.8155	16.922		929.77	99.9	1.634	58.876	-2.609	99.773	2.636	55.178		99.9	3.328
2020-12-31 11:00:00	132.625											0.43479	0	7372.24	-12.6657	-23.9253	-174.353	39.6161	17.0497													7218.54	-12.5423	-23.705	-173.158	45.4364	16.482		929.926	99.9	2.092	66.002		99.9	2.833	52.433		99.9	3.599
2020-12-31 12:00:00	58.8791											0.398722	0	7706.55	-12.2641	-23.1721	-169.379	39.0448	15.998													7591.26	-12.1112	-22.8966	-167.229	44.9057	15.9439		930.144	99.9	1.934	61.954		99.9	2.926	46.884		99.9	3.96
2020-12-31 13:00:00	66.9522											0.695718	0.186445	8040.85	-11.8625	-22.419	-164.406	38.4735	14.9462													7886.68	-11.7014	-22.1271	-161.83	44.0363	15.1865		929.69	99.9	1.8	51.223		99.9	2.891	45.463		99.9	3.912
2020-12-31 14:00:00	45.6303											0.847231	0	8206.18	-11.661	-22.0452	-162.2	40.5572	14.1616													8182.1	-11.2916	-21.3575	-156.431	43.1669	14.4292		929.091	99.9	1.776	55.221		99.9	3.043	41.654		99.9	4.268
2020-12-31 15:00:00	22.8371											1.21624	0	8331.7	-11.5065	-21.7608	-160.646	43.2664	13.4399													8390.9	-11.0299	-20.8675	-153.012	43.3639	13.9278		928.525	99.9	1.794	36.656		99.9	3.544	32.902		99.9	4.306
2020-12-31 16:00:00	0.638695											0.780876	0	8457.21	-11.3521	-21.4763	-159.092	45.9755	12.7183													8406.26	-11.0989	-21.0015	-154.014	45.9422	13.9982	1.396	928.264	99.302	1.24	59.31	1.24	96.375	2.687	44.386	1.314	98.877	3.346
2020-12-31 17:00:00	-0.283741											0.31106	0	8498.71	-11.3806	-21.5295	-159.495	45.8156	12.741													8421.62	-11.1678	-21.1355	-155.015	48.5204	14.0686	1.455	928.19	95.812	1.52	31.652	1.712	89.827	3.104	36.728	1.512	93.488	3.811
2020-12-31 18:00:00	-0.045769											0.697649	0	8520.4	-11.4523	-21.6623	-160.359	44.9792	12.9393													8448.43	-11.2231	-21.2415	-155.868	49.7196	14.0641	2.193	928.08	90.187	1.539	33.607	2.26	85.645	2.926	45.984	2.242	87.573	3.206
2020-12-31 19:00:00	-0.075302											0.874258	0	8542.09	-11.524	-21.7951	-161.223	44.1428	13.1375													8500.82	-11.2482	-21.2851	-156.388	47.8367	13.8925	2.117	927.939	90.308	1.821	34.691	2.322	85.365	3.678	40.281	2.312	86.802	4.055
2020-12-31 20:00:00	-0.094599											1.30727	0.186445	8693.85	-11.4058	-21.5686	-159.546	41.529	13.0027													8553.21	-11.2734	-21.3287	-156.908	45.9538	13.721	2.193	927.817	91.938	1.592	58.072	2.573	85.818	3.426	44.593	2.655	87.477	4.19
2020-12-31 21:00:00	-0.502014											1.52801	0	8876.28	-11.2428	-21.2574	-157.27	38.496	12.7894													8663.07	-11.2005	-21.1889	-155.874	44.3317	13.6372	2.692	927.686	90.735	1.77	53.3	2.803	86.885	3.673	47.87	2.678	90.948	4.045
2020-12-31 22:00:00												1.93406	0.186445	9058.71	-11.0798	-20.9462	-154.994	35.4631	12.5761													8901.12	-10.909	-20.6405	-151.375	43.2914	13.7493	3.13	927.524	90.887	1.907	41.074	2.988	88.517	3.733	50.029	2.8	93.225	4.098
2020-12-31 23:00:00												2.34634	0	9252.75	-10.8233	-20.466	-150.693	35.9112	13.0347													9139.16	-10.6176	-20.092	-146.875	42.251	13.8615	3.171	927.298	95.45	2.315	32.989	2.883	92.39	4.198	41.362	2.807	99.367	4.291
2021-01-01												2.47006	0.186445	9449.52	-10.5448	-19.9459	-145.916	37.1786	13.6515													9377.48	-10.4083	-19.6978	-143.999	41.3658	13.5833		927.075	99.9	2.09	41.297	2.64	98.165	3.851	41.051		99.9	4.221
2021-01-01 01:00:00												2.47694	0.372891	9646.28	-10.2662	-19.4258	-141.138	38.446	14.2683													9616.4	-10.3823	-19.648	-144.75	40.827	12.4337		926.615	99.9	2.148	42.591	2.307	99.473	4.104	44.153		99.9	4.46
2021-01-01 02:00:00	-0.149167											1.60129	4.1018	9551.49	-10.5213	-19.9073	-144.968	40.2218	14.2907													9855.33	-10.3563	-19.5982	-145.502	40.2882	11.2842		925.983	99.9	2.328	63.849	2.19	99.695	4.082	57.649		99.9	5.064
2021-01-01 03:00:00	-0.220355											0.952156	2.98313	9388.04	-10.902	-20.6247	-150.824	42.1173	14.1732													9972.6	-10.3942	-19.6693	-146.966	40.3079	10.3884		925.332	99.9	2.038	54.063	2.083	99.857	3.772	62.839		99.9	3.892
2021-01-01 04:00:00	-0.146317											0.372886	1.11867	9224.59	-11.2827	-21.342	-156.681	44.0129	14.0556													9818.64	-10.5745	-20.0099	-150.021	41.5726	10.0584		925.102	99.9	2.572	25.892	1.298	97.775	4.116	41.671		99.9	3.852
2021-01-01 05:00:00	0.06457											0.613944	0.745782	9186.98	-11.3898	-21.5437	-158.439	44.3611	13.9101													9664.67	-10.7548	-20.3504	-153.075	42.8374	9.72845		924.705	99.9	2.319	12.124	1.452	98.048	4.052	29.964		99.9	3.881
2021-01-01 06:00:00	0.044077											0.884213	0.372891	9179.04	-11.4325	-21.6238	-159.232	44.3445	13.7581													9622.37	-10.8548	-20.5357	-155.411	41.5238	8.8742		924.068	99.9	2.47	34.187	1.448	98.815	4.711	41.663		99.9	5.27
2021-01-01 07:00:00	7.3638											1.16661	0	9171.09	-11.4751	-21.7038	-160.025	44.3279	13.606													9829.09	-10.7759	-20.3746	-156.146	34.4614	6.85093	2.148	923.602	99.23	2.531	17.509	1.963	93.875	4.546	28.886	2.089	98.67	4.5
2021-01-01 08:00:00	17.1698											1.88321	0	9447.85	-11.4453	-21.6454	-159.325	42.967	13.8381													10035.8	-10.697	-20.2135	-156.88	27.399	4.82766	2.477	923.456	96.097	1.958	7.972	2.397	90.487	3.621	27.013	2.228	94.577	3.425
2021-01-01 09:00:00	35.4608											2.60191	0.186445	9791.53	-11.3984	-21.5544	-158.274	41.2899	14.1606													10250.3	-10.616	-20.0529	-156.893	22.7718	3.53026	2.67	923.505	99.235	1.369	15.942	2.387	92.593	2.722	42.519	2.292	94.695	3.108
2021-01-01 10:00:00	32.4167											3.14439	0.372891	10135.2	-11.3515	-21.4634	-157.224	39.6129	14.483													10482.2	-10.5303	-19.8936	-155.298	23.5717	3.85049		923.766	99.9	0.891	24.862	2.368	96.087	1.957	53.692	2.208	99.437	2.723
2021-01-01 11:00:00	50.209											3.34427	0.186445	10389	-11.2293	-21.2324	-155.041	38.6612	14.8188													10714.1	-10.4445	-19.7342	-153.703	24.3715	4.17072		924.152	99.9	1.534	34.649	2.328	98.193	2.845	34.417		99.9	3.029
2021-01-01 12:00:00	65.0572											3.79661	0	10621.7	-11.0893	-20.9686	-152.591	37.8802	15.1578													10920.2	-10.3612	-19.5786	-152.564	24.8252	4.06464		924.397	99.9	1.05	350.783	2.697	99.83	1.877	359.645		99.9	1.69
2021-01-01 13:00:00	85.6931											4.38872	0	10854.4	-10.9493	-20.7047	-150.141	37.0991	15.4967													11068.7	-10.283	-19.4313	-152.443	24.5067	3.00783	3.744	924.108	99.803	0.958	319.779	3.036	98.302	1.102	331.918		99.9	0.978
2021-01-01 14:00:00	61.2437											4.09931	0	10681.2	-10.9893	-20.78	-150.964	37.2905	15.2754													11217.3	-10.2047	-19.284	-152.321	24.1882	1.95103		923.522	99.9	0.9	43.455		99.9	1.111	20.609		99.9	1.106
2021-01-01 15:00:00	13.8039											3.52166	0	10412.8	-11.0715	-20.9348	-152.556	37.7101	14.9225													11193.1	-10.3173	-19.4953	-154.101	24.4114	1.862		922.997	99.9	1.548	85.106		99.9	1.975	71.283		99.9	2.114
2021-01-01 16:00:00	0.467253											2.83106	0.372891	10144.3	-11.1537	-21.0897	-154.148	38.1297	14.5696													10783.8	-10.8551	-20.5066	-160.122	25.8422	3.93096		922.894	99.9	1.341	92.082		99.9	2.012	86.17		99.9	2.561
2021-01-01 17:00:00	-0.15559											2.33275	0.372891	9922.72	-11.5072	-21.7544	-159.034	39.2979	15.0018													10374.5	-11.393	-21.5179	-166.143	27.2731	5.99991		922.976	99.9	1.86	77.053		99.9	3.099	67.04		99.9	3.563
2021-01-01 18:00:00	-0.123295											2.26706	0	9712.11	-11.9245	-22.5389	-164.693	40.6421	15.6184													10078	-11.7816	-22.2481	-170.589	28.1269	7.39601	2.38	923.211	99.877	1.618	43.788	1.679	97.923	2.963	42.499	1.75	99.793	3.474
2021-01-01 19:00:00	-0.168709											2.3013	0	9501.51	-12.3419	-23.3234	-170.352	41.9862	16.235													10032.5	-11.8379	-22.3528	-171.528	27.6962	7.29424	2.1	923.477	99.655	1.392	334.951	2.032	95.072	2.337	353.824	2.08	96.717	2.83
2021-01-01 20:00:00	-0.108934											2.24277	0	9356.55	-12.4812	-23.5849	-172.521	42.3123	16.1584													9987.08	-11.8942	-22.4576	-172.468	27.2654	7.19247	2.62	923.495	98.988	1.481	321.953	2.78	88.732	2.754	3.73	2.823	88.887	3.087
2021-01-01 21:00:00	-0.519562											1.83008	0	9226.97	-12.5553	-23.724	-173.872	42.4	15.9195													9871.06	-11.9903	-22.6393	-173.463	28.1597	7.65138		923.607	99.9	1.316	359.009	1.51	97.055	1.848	359.228	2.448	93.758	1.869
2021-01-01 22:00:00												1.57223	0	9097.39	-12.6295	-23.863	-175.224	42.4877	15.6805													9597.95	-12.1751	-22.9926	-174.582	32.0041	9.35867	1.8	923.483	99.888	0.602	212.407	2.37	87.907	0.935	168.388	3.11	82.153	0.764
2021-01-01 23:00:00												0.835657	0	8841.64	-12.701	-23.9963	-176.309	42.1144	15.6611													9324.83	-12.3599	-23.3458	-175.7	35.8485	11.066	1.782	923.376	95.142	2.159	311.322	2.722	81.068	2.708	303.053	3.322	75.49	1.465
2021-01-02												0.376269	0	8556.39	-12.772	-24.1282	-177.332	41.6332	15.6931													9105.6	-12.4412	-23.4814	-176.896	26.8433	10.9558	1.538	923.384	94.035	2.032	313.804	2.107	83.19	2.857	317.819	2.905	75.583	2.973
2021-01-02 01:00:00												0.126116	0	8271.14	-12.8429	-24.2601	-178.356	41.1521	15.725													9049.45	-12.5335	-23.6445	-179.776	21.4947	9.37999		922.894	99.9	0.844	54.232	1.09	92.9	1.833	307.121	1.402	90.68	2.388
2021-01-02 02:00:00	-0.03565											0.540796	0	8321.29	-12.9309	-24.4207	-179.467	38.9199	15.899													9008.57	-12.7112	-23.9884	-183.192	27.5449	8.71559	0.967	922.313	99.862	1.166	35.224	0.817	95.453	1.606	87.912	1.233	94.712	1.8
2021-01-02 03:00:00	0.037914											0.925697	0	8449.9	-13.023	-24.5881	-180.599	36.278	16.1063													8958.15	-13.0615	-24.6496	-188.29	30.7471	8.90621	0.915	922.096	98.242	1.697	344.279	2.007	79.402	1.656	303.764	2.543	72.358	1.693
2021-01-02 04:00:00	-0.07212											0.639661	0	8578.5	-13.115	-24.7555	-181.73	33.6361	16.3135													8886.5	-13.7953	-26.016	-197.13	27.6185	10.9975	0.975	921.977	99.647	2.399	310.066	0.629	98.297	3.791	294.443	0.998	95.08	2.62
2021-01-02 05:00:00	-0.183852											0.534226	0.186445	8577.63	-14.192	-26.7681	-197.221	33.8581	16.9238													8814.85	-14.5292	-27.3824	-205.97	24.49	13.0887		921.436	99.9	1.848	53.989	0.592	99.628	3.034	60.048		99.9	3.646
2021-01-02 06:00:00	-0.191526											0.42668	1.86445	8546.45	-15.4995	-29.2125	-216.072	34.75	17.6283													8791.02	-15.1599	-28.5579	-214.339	22.5321	14.1237		921.049	99.9	1.977	318.577	1.158	95.107	3.906	348.022	1.75	97.602	4.432
2021-01-02 07:00:00	2.61926											0.483834	1.86445	8515.28	-16.807	-31.6569	-234.922	35.642	18.3329													8873.37	-15.5617	-29.3095	-221.663	23.1737	12.8136	1.211	921.166	99.353	2.886	310.313	1.94	88.425	4.943	324.927	2.037	89.222	4.525
2021-01-02 08:00:00	20.1936											0.586264	0.372891	8766.76	-16.8519	-31.7425	-235.886	36.3677	18.0538													8955.71	-15.9635	-30.0611	-228.986	23.8152	11.5035	0.968	920.787	99.792	3.384	299.713	0.857	92.54	5.358	311.838	1.248	88.508	4.869
2021-01-02 09:00:00	64.8471											1.2428	0.559336	9084.28	-16.6017	-31.277	-232.672	37.0546	17.5448													9180.43	-16.0538	-30.2298	-231.704	23.8616	10.1343	1.1	920.593	99.083	2.222	341.522	1.097	88.94	3.722	327.198	1.757	79.58	3.776
2021-01-02 10:00:00	114.599											2.45458	0.559336	9401.8	-16.3515	-30.8116	-229.457	37.7414	17.0359													9721.19	-15.4525	-29.1045	-224.201	22.5867	8.63415	1.665	920.514	97.622	2.226	306.36	1.745	88.12	3.385	317.72	1.986	82.962	4.463
2021-01-02 11:00:00	102.28											3.29325	0	9576.93	-15.948	-30.0581	-223.904	37.6733	16.5607													10261.9	-14.8512	-27.9791	-216.699	21.3118	7.13394		920.763	99.9	1.225	83.711	1.5	99.898	2.601	324.253		99.9	2.681
2021-01-02 12:00:00	82.3442											3.59819	0	9718.77	-15.5087	-29.2373	-217.805	37.4287	16.0934													10484.4	-14.443	-27.2176	-210.854	21.8218	6.88681	2.736	920.481	94.04	1.075	85.593	2.068	94.142	1.38	70.061	1.807	97.21	1.01
2021-01-02 13:00:00	32.6431											3.02673	0	9860.61	-15.0693	-28.4165	-211.706	37.184	15.6261													9999.44	-14.4638	-27.2648	-208.694	26.2975	9.42367	2.708	920.495	96.618	1.32	275.311	1.892	95.907	2.174	285.913	1.975	96.235	2.034
2021-01-02 14:00:00	39.6867											2.71439	0	9624.55	-14.8348	-27.9767	-208.472	36.3101	15.3414													9514.52	-14.4846	-27.3119	-206.535	30.7731	11.9605	2.387	920.186	93.483	1.344	55.697	1.997	88.34	1.906	47.652	2.888	74.34	2.052
2021-01-02 15:00:00	22.8205											2.76387	0	9300.11	-14.6481	-27.6259	-205.908	35.289	15.0993													9072.79	-14.4265	-27.2083	-204.034	33.5408	13.6325	2.383	920.05	95.753	2.919	287.294	1.845	91.712	5.127	290.361	1.833	91.922	4.322
2021-01-02 16:00:00	0.381547											1.51093	0	8975.67	-14.4615	-27.2752	-203.345	34.2679	14.8572													8726.98	-14.1929	-26.7697	-200.774	32.5149	13.3835	1.453	920.231	89.833	1.203	305.098	1.343	84.605	2.382	289.487	1.38	83.755	2.673
2021-01-02 17:00:00	-0.240236											1.09887	0	8787.92	-14.2939	-26.9645	-200.861	35.6688	14.8549													8381.16	-13.9594	-26.3312	-197.515	31.4889	13.1344	1.135	920.254	87.162	1.304	256.711	1.133	82.008	2.912	269.104	1.378	80.003	3.404
2021-01-02 18:00:00	-0.214506											1.06515	0	8632.15	-14.1308	-26.6631	-198.396	37.6361	14.9088													8137.61	-13.7965	-26.0246	-195.444	30.4139	12.7532	0.737	920.517	92.427	2.176	257.994	1.003	83.302	3.116	266.857	1.637	77.45	2.374
2021-01-02 19:00:00	-0.203769											1.04194	0	8476.37	-13.9676	-26.3617	-195.931	39.6034	14.9626													8120.85	-13.7902	-26.0107	-196.007	29.23	12.0788	0.942	920.872	91.008	2.365	283.386	1.057	84.135	3.809	293.239	1.4	82.965	2.47
2021-01-02 20:00:00	-0.12919											0.926712	0	8295.01	-14.0344	-26.4894	-196.662	41.1439	15.2536													8104.08	-13.784	-25.9967	-196.57	28.0462	11.4043	0.978	921.359	91.648	2.247	305.926	0.902	83.067	4.471	299.454	0.778	83.827	4.095
2021-01-02 21:00:00	-0.328827											0.6016	0	8107.68	-14.1549	-26.7173	-198.138	42.5848	15.5999													7982.84	-13.8304	-26.0844	-197.237	28.5133	11.4383	0.713	921.74	86.412	1.155	340.608	0.448	82.932	1.879	311.212	0.453	81.835	2.144
2021-01-02 22:00:00												0.471329	0	7920.35	-14.2753	-26.9451	-199.615	44.0258	15.9463													7629.85	-13.9936	-26.3973	-198.135	32.6428	13.0436	0.402	921.836	91.14	1.992	315.662	0.235	84.487	4.597	305.21	0.057	85.917	5.363
2021-01-02 23:00:00												0.147989	0	7659.29	-14.4439	-27.2557	-201.702	41.4829	16.3435													7276.86	-14.1569	-26.7103	-199.033	36.7722	14.6489	0.24	922.138	84.33	1.378	316.241	0.123	81.093	2.157	319.099	0.16	80.692	2.23
2021-01-03												-0.427425	0	7381.04	-14.6238	-27.5855	-203.931	38.0109	16.7525													7010.21	-14.2859	-26.9557	-199.916	38.9843	15.7301	-0.083	922.179	86.167	2.596	288.851	-0.028	81.457	4.504	290.981	0.118	79.5	4.197
2021-01-03 01:00:00												-0.95411	0	7102.79	-14.8037	-27.9153	-206.161	34.5389	17.1616													6934.99	-14.3392	-27.0515	-200.763	36.9457	15.6492	-0.378	922.472	95.03	1.696	311.408	-0.372	94.283	3.358	309.329	-0.232	94.453	3.896
2021-01-03 02:00:00	-0.242416											-1.25794	0	7119.5	-14.8485	-27.9982	-206.683	34.0987	17.3022													6859.78	-14.3925	-27.1473	-201.61	34.9071	15.5683	-0.102	922.428	83.818	1.535	327.162	0.177	80.028	1.863	2.352	0.263	82.94	1.47
2021-01-03 03:00:00	-0.139005											-0.942763	0	7205	-14.8617	-28.0235	-206.808	34.3654	17.3803													6784.54	-14.4651	-27.2817	-202.607	34.0707	15.647	-0.732	922.445	89.987	1.978	317.395	0.243	80.948	2.756	319.068	0.797	76.685	2.183
2021-01-03 04:00:00	-0.130401											-0.651734	0	7290.49	-14.875	-28.0488	-206.932	34.6321	17.4583													6709.24	-14.5809	-27.5014	-203.932	35.8982	16.0791	-0.893	922.73	97.765	1.964	334.799	-0.6	90.987	2.783	349.757	-0.247	90.165	2.39
2021-01-03 05:00:00	-0.15729											-0.329089	0	7255.81	-14.8606	-28.0238	-206.698	35.7367	17.4924													6633.93	-14.6967	-27.7212	-205.258	37.7257	16.5113	-0.183	922.682	83.098	1.421	6.79	0.445	74.088	1.648	25.251	1.11	74.232	1.733
2021-01-03 06:00:00	-0.026413											-0.155229	0	7193.13	-14.8396	-27.9871	-206.381	37.0363	17.5162													6737.22	-14.6794	-27.6907	-204.912	38.7581	16.6136	0.738	922.717	75.175	2.62	307.987	1.018	70.855	4.189	309.938	1.237	72.257	2.974
2021-01-03 07:00:00	29.4594											-0.579802	0	7130.46	-14.8187	-27.9504	-206.063	38.336	17.54													7236.16	-14.3672	-27.1058	-200.861	38.029	15.985	-0.265	922.618	89.838	1.622	324.989	-0.063	83.152	2.561	331.038	0.572	74.975	2.071
2021-01-03 08:00:00	133.999											0.840697	0	7445.85	-14.6475	-27.6351	-203.139	40.9366	17.9416													7735.11	-14.0551	-26.5208	-196.81	37.2999	15.3565	0.592	922.813	85.313	1.016	65.75	0.805	76.855	1.172	239.293	1.318	71.835	1.486
2021-01-03 09:00:00	143.067											2.2893	0	7849.25	-14.4412	-27.2549	-199.608	43.8399	18.4311													8146.45	-13.7885	-26.022	-193.059	37.1253	15.1172	1.183	923.305	90.13	1.067	254.917	1.07	81.465	1.59	313.729	1.645	72.968	1.695
2021-01-03 10:00:00	188.231											3.91266	0	8252.65	-14.235	-26.8748	-196.078	46.7433	18.9205													8364.03	-13.6225	-25.7134	-189.968	38.1775	15.7392	2.497	923.741	79.887	0.683	123.43	1.938	77.288	0.744	66.175	1.873	73.23	0.683
2021-01-03 11:00:00	278.673											5.12237	0	8384.43	-14.042	-26.5152	-193.075	47.4156	19.0463													8581.61	-13.4565	-25.4049	-186.878	39.2298	16.3613	3.625	924.238	72.93	1.104	145.526	2.815	73.1	1.089	90.172	2.747	70.283	1.716
2021-01-03 12:00:00	144.342											5.40011	0	8452.96	-13.8522	-26.1603	-190.195	47.5683	19.0873													8746.43	-13.2973	-25.1087	-184.054	40.1665	16.8152	4.287	924.914	69.743	1.434	89.643	3.528	70.312	1.937	81.302	3.235	70.043	3.082
2021-01-03 13:00:00	150.206											5.14645	0	8521.49	-13.6623	-25.8055	-187.316	47.7211	19.1283													8794.51	-13.153	-24.8399	-181.822	40.8477	16.8971	4.152	924.995	76.08	1.118	119.29	3.588	73.94	1.419	102.538	3.507	69.35	1.62
2021-01-03 14:00:00	151.346											5.55947	0	8378.89	-13.561	-25.615	-186.738	47.2049	18.1823													8842.59	-13.0087	-24.571	-179.589	41.5289	16.9791	4.083	924.811	76.42	1.015	172.687	3.585	74.192	0.928	159.371	3.56	72.14	1.305
2021-01-03 15:00:00	30.1893											3.67529	0	8187.32	-13.4802	-25.4627	-186.694	46.5336	17.0075													8720.72	-13.0121	-24.5777	-179.572	41.6909	17.0495	3.002	924.805	80.262	1.455	197.778	2.912	73.342	1.496	191.793	2.952	70.165	1.167
2021-01-03 16:00:00	1.05251											1.36751	0	7995.75	-13.3994	-25.3103	-186.65	45.8622	15.8327													8223.06	-13.3423	-25.1938	-184.455	40.705	17.0946	1.807	925.024	88.997	1.707	279.962	2.878	74.863	2.288	263.401	2.928	70.348	1.624
2021-01-03 17:00:00	-0.279554											0.183032	0	7730.18	-13.5311	-25.5537	-189.005	44.2624	15.4244													7725.41	-13.6725	-25.8098	-189.338	39.7191	17.1397	2.002	925.395	79.928	2.561	292.713	3.012	70.177	2.912	293.758	2.902	69.887	1.542
2021-01-03 18:00:00	-0.321863											-0.365834	0	7447.43	-13.7122	-25.8891	-191.919	42.4471	15.1942													7398.18	-13.8634	-26.1669	-192.205	39.7182	17.1302	1.405	925.746	84.515	2.548	321.303	2.153	77.043	2.045	332.103	2.395	74.592	1.437
2021-01-03 19:00:00	-0.286901											-1.16551	0	7164.68	-13.8932	-26.2244	-194.832	40.6318	14.9639													7447.84	-13.7461	-25.9516	-190.612	41.8957	17.0003	1.783	926.082	82.89	1.394	285.64	2.125	75.56	1.087	36.991	2.317	71.865	1.551
2021-01-03 20:00:00	-0.311722											-1.64404	0	7011.97	-14.0259	-26.4686	-196.244	38.5316	15.5049													7497.51	-13.6288	-25.7362	-189.02	44.0732	16.8703	1.033	926.371	88.29	1.163	344.622	1.653	79.992	0.878	44.954	2.38	69.645	1.432
2021-01-03 21:00:00	-0.22583											-1.49513	0	6889.42	-14.1473	-26.6917	-197.309	36.3654	16.2249													7466.67	-13.5678	-25.6251	-188.158	45.6922	16.8427	0.607	926.75	85.228	0.989	340.799	1.892	71.277	1.197	359.65	2.245	67.762	1.442
2021-01-03 22:00:00												-2.23026	0	6766.87	-14.2687	-26.9148	-198.373	34.1992	16.9449													7258.05	-13.631	-25.7441	-188.912	46.0779	17.0411	0.358	926.912	84.683	1.866	341.545	1.507	73.587	1.23	320.72	2.137	69.253	1.092
2021-01-03 23:00:00												-2.54029	0	6614.84	-14.3484	-27.0679	-199.16	36.5347	17.3835													7049.42	-13.6943	-25.8631	-189.665	46.4636	17.2394	-0.075	927.011	88.172	1.54	331.395	0.96	74.195	3.005	314.298	1.758	69.195	2.345
2021-01-04												-2.6397	0	6455.96	-14.4183	-27.2049	-199.882	39.9153	17.7568													6847.87	-13.7336	-25.9366	-190.081	46.5095	17.4123	-0.342	927.216	85.235	0.977	12.969	0.913	72.635	1.572	343.74	1.913	66.772	2.262
2021-01-04 01:00:00												-2.49971	0	6297.08	-14.4882	-27.3418	-200.604	43.2958	18.1301													6661.93	-13.72	-25.91	-189.751	45.8051	17.5288	-0.797	927.068	87.625	1.254	285.111	-0.295	78.597	1.633	337.243	1.16	69.308	2.033
2021-01-04 02:00:00	-0.084361											-3.12202	0	6346.39	-14.4306	-27.2326	-199.547	42.4517	18.3137													6475.99	-13.7065	-25.8834	-189.422	45.1006	17.6454	-0.057	926.859	78.163	0.893	323.139	0.652	71.09	0.686	82.636	0.98	68.892	0.77
2021-01-04 03:00:00	-0.096546											-2.72714	0	6443.96	-14.3435	-27.0664	-198.078	40.6282	18.4535													6357.08	-13.7253	-25.9168	-189.615	44.1733	17.7197	-0.292	926.549	79.107	1.612	324.206	0.41	72.1	2.451	323.109	0.762	69.492	2.707
2021-01-04 04:00:00	-0.108379											-1.64404	0	6541.53	-14.2564	-26.9002	-196.608	38.8046	18.5932													6386.01	-13.8153	-26.0826	-190.96	42.7544	17.7008	-1.18	926.593	85.495	1.322	301.489	0.078	72.263	2.167	292.716	0.508	68.685	2.354
2021-01-04 05:00:00	-0.098989											-1.66135	0	6357.64	-14.4032	-27.1749	-198.841	38.9257	18.5579													6414.94	-13.9054	-26.2484	-192.306	41.3354	17.6819	-1.553	926.234	89.243	0.886	24.781	-0.395	74.362	1.772	324.993	0.245	68.817	3.049
2021-01-04 06:00:00	-0.220706											-2.60814	0	6108.5	-14.6043	-27.5518	-201.932	39.4975	18.482													6425.59	-14.0013	-26.4276	-193.685	41.2469	17.7365	-1.707	925.989	89.023	0.724	97.055	-0.835	78.538	0.957	3.267	-0.097	73.842	2.111
2021-01-04 07:00:00	14.3535											-3.26062	0	5859.37	-14.8054	-27.9287	-205.024	40.0693	18.4061													6395.96	-14.1101	-26.6363	-195.138	44.0901	17.9529	-1.269	925.793	84.315	0.827	188.176	-0.597	75.935	1.182	68.144	0.043	70.327	1.03
2021-01-04 08:00:00	60.7572											-1.30851	0	6268.26	-14.5434	-27.4414	-200.988	41.4249	18.5423													6366.33	-14.2189	-26.8451	-196.591	46.9332	18.1693	-1.131	925.703	81.898	1.012	27.012	-0.58	76.75	1.072	165.593	-0.227	80.235	1.271
2021-01-04 09:00:00	98.4799											-0.03532	0	6829.19	-14.1744	-26.7543	-195.307	42.9616	18.7277													6463.62	-14.1983	-26.8083	-196.222	47.9575	18.2451	-0.477	925.813	87.41	1.074	253.124	-0.765	84.643	1.898	227.006	-0.565	86.098	2.176
2021-01-04 10:00:00	130.573											1.26849	0	7390.12	-13.8054	-26.0673	-189.626	44.4983	18.913													6840.2	-13.8927	-26.2314	-191.84	44.9788	18.0112	0.098	925.974	91.847	0.869	240.188	-0.445	89.025	2.029	260.513	-0.582	91.783	2.858
2021-01-04 11:00:00	102.429											1.30429	0	7579.9	-13.7752	-26.0092	-189.369	43.6842	18.7047													7216.79	-13.5872	-25.6544	-187.458	42.0001	17.7772	0.018	926.189	97.058	1.266	215.957	-0.578	93.692	2.019	270.639	-0.507	95.425	3.056
2021-01-04 12:00:00	47.3144											1.18382	0	7683.85	-13.8232	-26.0966	-190.367	42.3265	18.4053													7529.84	-13.6594	-25.7864	-188.376	40.576	17.9146	0.509	926.044	96.225	2.534	261.597	-0.187	93.068	4.31	266.395	-0.111	97.157	5.031
2021-01-04 13:00:00	10.4462											0.502808	0	7787.8	-13.8713	-26.1839	-191.365	40.9688	18.106													7703.03	-14.5632	-27.4789	-200.962	42.5743	18.8692		925.549	99.9	1.618	251.333	-0.8	99.865	2.872	261.353		99.9	3.588
2021-01-04 14:00:00	5.02184											0.381168	0	7822.73	-14.7698	-27.8569	-203.878	38.2927	18.9768													7876.23	-15.467	-29.1715	-213.548	44.5725	19.8237		925.079	99.9	1.414	258.499		99.9	2.676	270.469		99.9	3.927
2021-01-04 15:00:00	3.05855											0.14337	0	7841.71	-15.8646	-29.8961	-219.051	35.3121	20.1179													8028.33	-15.9958	-30.1588	-221.756	44.0017	19.5145		924.854	99.9	2.587	314.222	-0.182	97.208	4.778	304.053	0.6	97.102	5.694
2021-01-04 16:00:00	2.26653											0.14995	0	7860.7	-16.9594	-31.9352	-234.223	32.3315	21.259													8133.98	-15.6985	-29.5924	-220.318	37.7715	16.421		925.13	99.9	3.08	327.997		99.89	5.788	319.732		99.9	5.568
2021-01-04 17:00:00	-0.18677											-0.09722	0	7792.76	-17.2157	-32.4153	-237.565	33.1709	21.7569													8239.63	-15.4013	-29.0261	-218.881	31.5412	13.3275		925.005	99.9	1.304	131.376		99.9	2.124	122.912		99.9	2.212
2021-01-04 18:00:00	-0.182255											0.147415	0	7704.74	-17.2785	-32.5354	-238.177	34.8923	22.1063													8290.76	-15.2481	-28.7342	-217.957	28.4067	11.9167		924.862	99.9	0.89	54.218		99.9	1.97	83.902		99.9	2.939
2021-01-04 19:00:00	-0.09831											0.11093	0	7616.73	-17.3412	-32.6555	-238.789	36.6136	22.4557													8221.9	-15.4117	-29.0466	-218.164	32.0855	14.209		925.61	99.9	0.636	35.501		99.9	1.228	20.848		99.9	2.323
2021-01-04 20:00:00	-0.049003											0.032294	0	7638.33	-17.2698	-32.5256	-237.768	38.3601	22.4373													8153.05	-15.5753	-29.359	-218.371	35.7643	16.5013		926.123	99.9	1.329	33.475		99.9	2.608	54.226		99.9	3.074
2021-01-04 21:00:00	-0.519562											0.115722	0	7685.19	-17.1675	-32.3381	-236.371	40.1125	22.3341													8064.41	-15.7425	-29.6762	-219.293	38.5224	18.1165		926.581	99.9	1.494	50.25	-0.892	99.87	3.267	45.818		99.9	3.726
2021-01-04 22:00:00												0.172948	0	7732.05	-17.0652	-32.1506	-234.974	41.8648	22.231													7932.26	-15.9175	-30.0042	-221.791	39.2563	18.243		926.825	99.9	1.518	49.136	-0.804	99.598	3.177	51.748		99.9	3.86
2021-01-04 23:00:00												0.063994	0	7226.43	-17.3572	-32.6924	-239.431	40.5526	22.1079													7800.11	-16.0924	-30.3322	-224.288	39.9902	18.3695		927.039	99.9	1.599	64.385	-0.974	99.678	3.181	60.648		99.9	3.684
2021-01-05												-0.734754	0	6593.32	-17.7401	-33.4025	-245.24	38.5332	21.9802													7610.32	-16.2583	-30.6435	-226.795	40.8665	18.353		927.145	99.9	1.647	66.926	-1.093	99.47	3.002	69.008		99.9	3.403
2021-01-05 01:00:00												-1.7835	0	5960.2	-18.1231	-34.1126	-251.049	36.5138	21.8525													7293.7	-16.4043	-30.9181	-229.323	42.0562	18.0217	-0.935	927.139	96.507	1.306	22.19	-0.5	90.828	1.974	48.098	-0.437	90.192	2.482
2021-01-05 02:00:00	-0.178801											-2.38622	0	5690.87	-18.2693	-34.3897	-253.246	39.0177	21.8714													6977.08	-16.5503	-31.1927	-231.851	43.2459	17.6904	-1.387	927.125	92.55	1.569	12.042	-0.097	81.733	2.225	36.267	-0.19	83.077	2.935
2021-01-05 03:00:00	-0.351665											-2.80672	0	5505.36	-18.361	-34.567	-254.612	42.564	21.9242													6691.96	-16.6205	-31.3264	-233.122	44.7303	17.4893	-1.658	927.013	91.887	1.37	356.692	-0.451	79.945	2.958	38.503	-0.388	80.475	3.336
2021-01-05 04:00:00	-0.301594											-3.03657	0	5319.86	-18.4527	-34.7443	-255.977	46.1103	21.977													6476.05	-16.5244	-31.1509	-231.633	46.8623	17.574	-2.093	926.963	91.383	1.08	351.47	-0.452	76.222	2.227	42.928	-0.257	75.663	3.277
2021-01-05 05:00:00	-0.317003											-3.53736	0	5188.39	-18.4759	-34.7894	-256.242	47.2353	22.0734													6260.13	-16.4282	-30.9753	-230.144	48.9942	17.6587	-2.472	926.674	88.862	1.534	308.993	-1.328	79.145	2.741	33.815	-0.937	78.538	3.509
2021-01-05 06:00:00	-0.260945											-3.6091	0	5069.35	-18.4832	-34.8042	-256.254	47.8029	22.1798													6134.99	-16.2919	-30.7232	-227.976	50.221	17.8099	-2.523	926.217	88.09	1.279	40.834	-1.104	77.345	2.318	49.86	-0.94	77.42	3.067
2021-01-05 07:00:00	5.35377											-3.75184	0	4950.32	-18.4906	-34.8189	-256.265	48.3706	22.2863													6209.28	-16.0674	-30.3029	-224.316	49.4597	18.1072	-3.592	925.937	99.317	1.522	11.924	-2.673	86.25	1.841	50.302	-1.281	78.23	2.497
2021-01-05 08:00:00	24.3496											-3.0884	0	5534.18	-18.0818	-34.0559	-249.872	47.7224	22.5757													6283.58	-15.843	-29.8826	-220.656	48.6983	18.4046	-2.817	926.158	88.458	1.777	355.338	-1.733	76.158	1.966	32.775	-1.207	76.758	2.302
2021-01-05 09:00:00	41.7717											-1.21669	0	6279.81	-17.5773	-33.1139	-242.004	46.7943	22.9072													6464.37	-15.7285	-29.6664	-218.404	47.3993	18.927	-1.934	926.377	88.845	1.414	345.365	-1.015	75.485	1.422	40.864	-0.653	73.507	2.431
2021-01-05 10:00:00	29.0699											0.093402	0	7025.44	-17.0728	-32.1719	-234.137	45.8663	23.2388													6878.8	-15.8551	-29.8981	-219.242	44.9212	19.9431	-0.888	926.709	91.12	1.617	322.619	-0.497	73.893	1.302	3.442	-0.112	70.835	1.872
2021-01-05 11:00:00	31.6775											0.477193	0	7350.39	-16.9106	-31.8717	-231.884	47.0474	23.0904													7293.23	-15.9816	-30.1299	-220.08	42.443	20.9591	-0.592	926.923	93.37	1.054	29.832	-0.25	73.167	1.97	1.67	0.185	69.007	1.53
2021-01-05 12:00:00	70.1382											0.70902	0.372891	7578.53	-16.8272	-31.7192	-230.922	48.7139	22.8317													7592.19	-16.0468	-30.2498	-220.374	41.4377	21.6241	0.055	927.076	92.878	0.543	122.695	0.715	73.768	1.224	0.228	0.692	72.008	1.531
2021-01-05 13:00:00	127.721											0.859011	0.372891	7806.68	-16.7438	-31.5667	-229.961	50.3805	22.5729													7637.65	-15.9774	-30.1242	-219.475	43.6662	21.5182	-0.055	926.749	98.532	0.63	236.506	0.412	75.337	0.547	271.824	0.667	64.675	1.181
2021-01-05 14:00:00	138.797											0.920935	0.186445																			7683.11	-15.9079	-29.9986	-218.577	45.8947	21.4123	0.562	926.251	93.958	0.715	213.558	0.158	81.3	1.512	267.072	0.325	73.293	2.2
2021-01-05 15:00:00	108.303											1.27801	1.11867																									1.442	925.816	93.617	1.05	266.41	0.807	89.89	2.348	275.427	0.357	90.533	2.788
2021-01-05 16:00:00	17.3229											0.437763	0																									0.862	925.695	99.888	0.634	186.878	-0.093	98.668	1.084	230.996	0.133	99.412	1.899
2021-01-05 17:00:00	-0.392219											0.01777	0																										925.878	99.9	1.072	343.888	-0.418	97.945	1.149	228.216	-0.389	99.708	1.803
2021-01-05 18:00:00	-0.446992											-0.633621	0																										926.027	99.9	0.982	283.859	-0.716	95.058	2.552	287.61	-0.548	92.63	2.973
2021-01-05 19:00:00	-0.4393											-1.25742	0																										925.946	99.9	0.771	24.384	-0.934	91.37	1.084	27.996	-0.761	92.31	1.562
2021-01-05 20:00:00	-0.272959											-1.40149	0																										925.959	99.9	1.869	298.108	-0.553	86.717	1.111	335.972	-0.657	88.378	0.877
2021-01-05 21:00:00	-0.38147											-1.65607	0																										926.202	99.9	2.679	292.693	-1.053	88.487	1.54	302.241	-0.155	81.098	0.579
2021-01-05 22:00:00												-1.99109	0																									-1.842	926.356	98.838	3.04	293.674	-1.777	93.217	4.437	276.894	-0.528	80.473	2.598
2021-01-05 23:00:00												-2.34087	0																									-2.05	926.525	95.523	2.119	319.049	-2.042	91.798	3.657	304.906	-1.56	87.34	4.048
2021-01-06												-2.81593	0																									-2.36	926.576	98.182	1.504	327.634	-2.535	94.467	2.657	310.861	-2.062	90.682	3.435
2021-01-06 01:00:00												-3.10246	0																										926.596	99.9	1.096	278.761	-3.23	99.683	3.156	283.691	-2.78	99.582	3.519
2021-01-06 02:00:00	-0.151572											-3.08078	0																										926.372	99.9	1.701	247.168	-3.275	99.765	3.29	258.478	-2.076	94.963	4.139
2021-01-06 03:00:00	-0.308258											-3.16452	0																										926.371	99.9	1.391	320.126	-3.5	99.685	3.227	294.145		99.9	3.952
2021-01-06 04:00:00	-0.352116											-3.54964	0																										926.895	99.9	2.298	307.7	-3.832	97.565	3.6	300.896	-3.685	99.157	2.026
2021-01-06 05:00:00	-0.357489											-4.66986	0																									-4.4	927.112	99.887	1.019	331.345	-4.302	99	1.166	320.647		99.9	2.12
2021-01-06 06:00:00	-0.219984											-5.27468	0																									-4.672	927.221	99.178	1.229	349.352	-4.535	94.832	1.938	310.042	-4.325	95.845	2.858
2021-01-06 07:00:00	22.0399											-5.58291	0																									-4.855	927.328	98.427	1.213	356.45	-4.193	89.797	1.813	298.854	-3.752	86.582	3.359
2021-01-06 08:00:00	135.184											-3.95342	0																									-3.348	927.597	96.597	1.238	342.442	-3.342	85.72	2.075	311.978	-2.837	78.86	3.646
2021-01-06 09:00:00	27.1146											-1.69273	0.372891																									-1.298	928.067	85.843	0.926	250.89	-1.782	79.325	2.808	298.042	-1.807	76.258	4.988
2021-01-06 10:00:00	131.637											0.705738	0.186445																									0.097	928.582	77.353	1.398	241.237	-0.815	76.948	2.536	277.4	-1.168	77.128	3.168
2021-01-06 11:00:00	324.741											1.71162	0.559336																									0.947	929.149	75.1	1.898	265.344	-0.01	76.73	2.759	263.169	-0.462	78.148	3.303
2021-01-06 12:00:00	371.417											2.31525	0.372891																									1.705	929.471	72.975	1.894	248.011	0.627	75.267	2.578	257.591	0.172	77.125	2.935
2021-01-06 13:00:00	304.053											2.7953	0.372891																									1.538	929.328	77.8	1.222	269.533	0.602	79.757	1.706	260.685	0.217	82.228	1.856
2021-01-06 14:00:00	192.506											2.45806	0																									1.52	928.823	76.312	2.047	238.806	0.523	79.147	2.554	228.171	0.182	81.688	2.974
2021-01-06 15:00:00	53.3962											0.868763	0	6977.56	-14.6761	-27.7064	-201.232	50.5402	20.4195													6728.53	-14.3151	-27.0391	-196.472	54.6863	19.8407	0.783	928.733	79.497	2.088	236.934	0.108	80.848	3.138	242.218	-0.222	83.648	3.181
2021-01-06 16:00:00	2.52163											-0.970207	0	6676.83	-14.7378	-27.8191	-202.656	49.1232	19.8972													6650.52	-14.3149	-27.0386	-196.584	54.587	19.7255	-0.852	929.108	85.567	2.803	246.789	-0.938	83.618	4.064	245.63	-1.085	85.14	4.368
2021-01-06 17:00:00	-0.359793											-2.12779	0	6376.09	-14.7995	-27.9318	-204.08	47.7063	19.3749													6432.29	-14.5518	-27.4785	-200.418	52.9981	19.4098	-1.44	929.514	85.897	2.98	280.314	-0.75	80.34	4.533	280.191	-0.405	81.615	4.848
2021-01-06 18:00:00	-0.331644											-2.7991	0	6130.78	-14.9871	-28.2833	-207.082	48.3475	19.1845													6214.07	-14.7887	-27.9183	-204.253	51.4091	19.0942	-2.185	929.738	88.13	2.776	286.8	-0.746	80.807	3.206	293.838	-0.565	84.538	1.658
2021-01-06 19:00:00	-0.342414											-3.40346	0	5908	-15.2257	-28.7319	-210.726	49.825	19.129													6007.43	-15.0047	-28.3201	-207.72	50.3448	18.84	-2.577	930.022	91.34	3.222	289.933	-1.613	83.88	3.095	291.751	-0.941	82.722	0.98
2021-01-06 20:00:00	-0.374787											-3.86465	0	5685.21	-15.4644	-29.1804	-214.37	51.3025	19.0735													5844.03	-15.1427	-28.5794	-209.82	51.2384	18.8154	-2.497	930.421	84.442	2.978	307.467	-1.827	79.903	3.747	297.806	-1.317	80.553	2.23
2021-01-06 21:00:00	-0.27771											-4.41509	0	5398.16	-15.7801	-29.772	-219.053	52.4678	19.1235													5680.62	-15.2806	-28.8387	-211.919	52.132	18.7909	-2.965	930.845	86.043	3.074	306.704	-2.37	81.408	3.364	300.655	-1.927	81.875	2.012
2021-01-06 22:00:00												-5.08817	0	5085.02	-16.1272	-30.4217	-224.157	53.5063	19.2163													5554.88	-15.3922	-29.0496	-213.626	53.4266	18.7707	-3.158	931.213	89.002	2.565	319.184	-2.818	85.002	2.905	315.094	-2.63	86.785	1.907
2021-01-06 23:00:00												-5.49135	0	4771.88	-16.4742	-31.0714	-229.262	54.5448	19.3091													5569.78	-15.4055	-29.0796	-213.87	56.2189	18.7671	-3.195	931.501	90.357	0.892	322.02	-3.13	91.43	1.219	61.54	-3.162	96.118	1.071
2021-01-07												-5.64238	0	4602.97	-16.6896	-31.4764	-232.423	56.3068	19.3885													5584.69	-15.4188	-29.1096	-214.113	59.0113	18.7636	-3.298	931.617	91.63	1.882	330.341	-2.782	87.255	1.162	25.314	-2.373	87.598	1
2021-01-07 01:00:00												-6.39285	0	4492.57	-16.8515	-31.7822	-234.795	58.3624	19.4625													5597.22	-15.434	-29.1421	-214.351	61.2938	18.7858	-4.23	931.786	97.792	1.197	223.53	-3.792	90.777	1.251	110.353	-2.773	89.475	1.194
2021-01-07 02:00:00	-0.146958											-6.17182	0	4382.16	-17.0134	-32.088	-237.167	60.4179	19.5366													5600.88	-15.4562	-29.1842	-214.57	61.6739	18.9041	-3.983	931.678	96.202	1.697	29.354	-3.57	89.913	1.645	31.248	-2.593	89.413	0.728
2021-01-07 03:00:00	-0.120955											-5.91579	0	4333.74	-17.1199	-32.2898	-238.28	62.2063	20.0378													5604.53	-15.4784	-29.2264	-214.788	62.054	19.0225	-3.743	931.418	94.722	0.551	59.299	-2.68	87.895	0.618	290.204	-2.432	88.752	0.464
2021-01-07 04:00:00	-0.153352											-6.04901	0	4310.44	-17.2038	-32.4494	-238.883	63.8863	20.7123													5551.39	-15.5372	-29.3364	-215.47	62.1957	19.2212	-3.217	931.307	86.953	1.892	292.544	-1.895	76.18	1.469	281.869	-1.53	76.022	0.798
2021-01-07 05:00:00	-0.35497											-5.8448	0	4287.15	-17.2878	-32.609	-239.485	65.5663	21.3868													5286.29	-15.7325	-29.6996	-217.878	61.4483	19.7191	-4.848	931.038	87.785	1.441	31.633	-3.56	72.812	2.031	16.047	-1.627	66.487	1.862
2021-01-07 06:00:00	-0.204633											-6.35847	0	4409.62	-17.196	-32.4375	-237.863	65.3752	21.6366													5021.2	-15.9278	-30.0629	-220.286	60.7008	20.2171	-4.255	930.26	82.215	0.6	237.617	-3.322	66.54	1.257	63.734	-1.63	65.838	0.904
2021-01-07 07:00:00	1.64961											-6.27797	0	4591.2	-17.033	-32.1316	-235.339	64.4253	21.7142													4890.01	-16.0529	-30.2949	-221.459	59.8058	20.9001	-4.637	929.916	81.308	0.822	25.248	-3.113	69.732	0.801	306.757	-1.535	64.393	0.905
2021-01-07 08:00:00	12.8527											-5.22884	0	4772.78	-16.87	-31.8258	-232.815	63.4755	21.7918													5258.45	-15.9163	-30.0371	-218.023	58.3604	22.2734	-2.98	930.316	76.758	0.702	229.385	-2.182	61.078	1.202	58.245	-1.655	52.455	2.209
2021-01-07 09:00:00	38.2229											-2.36748	0	5218.69	-16.4658	-31.0712	-226.085	63.2047	22.4849													5626.89	-15.7796	-29.7793	-214.587	56.915	23.6468	-0.992	930.478	74.292	1.25	54.811	-1.045	60.767	3.615	47.547	-0.522	58.193	5.698
2021-01-07 10:00:00	261.331											1.57543	0.186445	5771.72	-15.964	-30.1347	-217.65	63.2091	23.4274													5880.19	-15.6141	-29.4676	-211.18	55.4435	24.5604	1.128	931.043	69.095	0.97	88.958	0.375	63.382	3.12	49.011	0.373	56.032	4.338
2021-01-07 11:00:00	365.802											2.44273	0	6324.75	-15.4622	-29.1981	-209.215	63.2135	24.37													5704.26	-15.3414	-28.9552	-207.881	53.8748	23.7602	2.058	931.395	63.8	1.162	93.472	1.145	63.708	2.015	52.626	1.312	51.365	3.11
2021-01-07 12:00:00	192.703											3.32551	0	6558.55	-15.0239	-28.3764	-202.8	61.6609	24.2111													5528.33	-15.0687	-28.4428	-204.583	52.3062	22.96	2.875	931.344	52.067	1.37	125.8	2.012	52.588	1.449	103.022	1.587	52.263	2.408
2021-01-07 13:00:00	174.7											3.22936	0	6662.68	-14.6113	-27.6013	-197.206	59.4758	23.6048													5458	-14.7792	-27.8998	-200.912	51.2111	22.2868	3.063	931.045	59.078	1.534	88.898	2.267	60.607	1.896	93.749	1.9	62.315	1.991
2021-01-07 14:00:00	109.27											2.44091	0	6766.81	-14.1987	-26.8263	-191.611	57.2908	22.9986													5781.05	-14.427	-27.2426	-195.854	51.8805	22.0869	2.925	930.513	63.562	1.202	84.709	2.295	64.457	1.645	91.821	1.993	65.717	1.8
2021-01-07 15:00:00	33.8308											0.592918	0	6805.79	-14.1017	-26.6398	-190.994	54.407	22.1239													6104.11	-14.0747	-26.5855	-190.797	52.5499	21.8869	2.422	929.989	66.088	1.234	61.872	2.146	65.66	1.495	63.224	1.969	66.918	1.552
2021-01-07 16:00:00	1.30244											-0.74314	0	6818.42	-14.1324	-26.6913	-192.39	51.2406	21.1407													6377.69	-13.772	-26.02	-186.411	52.7446	21.7496	2.39	929.804	66.97	0.956	29.672		66.775	1.464	41.542	1.906	68.595	1.568
2021-01-07 17:00:00	-0.337338											-1.18338	0	6831.05	-14.1631	-26.7429	-193.785	48.0743	20.1574													6467.09	-13.6539	-25.7961	-184.524	51.1718	21.8454	2.508	929.88	70.463	1.562	343.162	2.171	71.138	1.427	6.445	1.855	73.657	1.222
2021-01-07 18:00:00	-0.34639											-1.43656	0	6734.85	-14.2885	-26.9792	-195.588	49.1227	20.2454													6556.49	-13.5358	-25.5722	-182.637	49.599	21.9413	1.813	930	73.525	1.494	328.799	2.002	72.498	1.064	337.39	1.873	74.44	0.795
2021-01-07 19:00:00	-0.386278											-1.71907	0	6594.56	-14.4522	-27.2903	-197.555	51.879	20.7675													6568.92	-13.4967	-25.4979	-181.961	48.8779	22.0227	0.462	930.083	71.683	1.112	336.141	1.412	71.945	1.189	330.567	1.912	70.467	0.988
2021-01-07 20:00:00	-0.354307											-1.97556	0	6454.27	-14.616	-27.6015	-199.522	54.6353	21.2896													6294.48	-13.7526	-25.9809	-185.797	51.3309	22.0503	0.573	930.139	72.652	0.582	175.988	1.21	69.595	0.995	322.499	1.548	68.252	2.006
2021-01-07 21:00:00	-0.623321											-1.72694	0	6346.16	-14.7762	-27.9005	-201.343	54.4337	21.8604													6020.03	-14.0084	-26.4639	-189.634	53.784	22.0778	-0.102	930.461	72.57	0.704	74.648	1.068	66.337	0.88	354.984	1.637	63.163	1.996
2021-01-07 22:00:00												-2.30151	0	6251.08	-14.9349	-28.1945	-203.105	53.0344	22.4509													5768.08	-14.2245	-26.8719	-192.937	55.8496	22.0381	-1.06	930.602	71.462	0.793	198.702	-0.156	67.777	1.448	312.234	1.21	62.605	2.945
2021-01-07 23:00:00												-1.91506	0	6155.99	-15.0937	-28.4886	-204.867	51.6352	23.0415													5599.83	-14.2926	-27.0005	-194.256	56.4731	21.7482	-0.391	930.976	66.315	0.66	131.018	0.183	62.442	0.814	128.97	0.977	63.27	1.894
2021-01-08												-2.96183	0	5855.84	-15.1899	-28.6688	-206.916	51.8418	22.434													5431.59	-14.3608	-27.1291	-195.575	57.0966	21.4583	-0.722	931.084	67.603	0.823	33.808	-0.047	65.198	0.891	342.302	1.093	67.9	1.93
2021-01-08 01:00:00												-4.22569	0	5472.77	-15.2609	-28.8029	-209.081	52.6979	21.3419													5283.17	-14.3717	-27.1496	-196.034	57.1835	21.1623	-1.955	931.076	76.857	0.678	71.798	-0.593	72.028	0.723	199.486	0.588	67.657	1.957
2021-01-08 02:00:00	-0.377325											-4.88772	0	5089.69	-15.3318	-28.937	-211.246	53.554	20.2499													5208.45	-14.1695	-26.768	-193.301	55.2755	20.8435	-2.577	930.82	78.585	0.603	69.285	-1.005	69.998	0.734	107.016	0.17	64.202	1.15
2021-01-08 03:00:00	-0.194219											-4.86866	0	4893.72	-15.3006	-28.8773	-210.997	52.8284	20.0218													5133.74	-13.9674	-26.3865	-190.567	53.3675	20.5247	-2.243	930.413	75.773	1.064	22.021	-0.773	64.667	1.372	47.475	-0.13	62.095	1.723
2021-01-08 04:00:00	-0.308439											-5.40566	0	4773.46	-15.228	-28.7391	-209.77	51.4628	20.1434													5051.31	-13.8199	-26.1081	-188.57	51.9346	20.2943	-2.443	930.459	73.808	1.397	338.681	-1.472	66.188	2.016	331.297	-0.674	62.353	2.433
2021-01-08 05:00:00	-0.350164											-6.03535	0	4653.2	-15.1554	-28.601	-208.543	50.0972	20.2649													4940.23	-13.8757	-26.2132	-189.313	52.2688	20.3927	-3.717	930.179	77.46	1.34	302.05	-2.248	66.425	2.34	301.465	-1.158	59.175	2.017
2021-01-08 06:00:00	-0.275109											-5.79189	0	4690.71	-15.1842	-28.6568	-208.338	51.1659	20.9163													4829.14	-13.9316	-26.3182	-190.055	52.6029	20.491	-1.867	929.867	65.367	1.356	25.294	-1.527	64.36	1.554	352.215	-1.573	66.232	2.148
2021-01-08 07:00:00	32.9418											-5.98554	0	4792.03	-15.254	-28.791	-208.546	53.2193	21.782													4761.97	-14.0681	-26.575	-191.739	53.4296	20.8616	-3.778	929.551	76.545	1.003	339.465	-2.108	64.803	0.94	13.94	-1.163	61.123	1.191
2021-01-08 08:00:00	167.841											-4.61548	0	4893.36	-15.3239	-28.9253	-208.754	55.2727	22.6476													4857.83	-14.5043	-27.3952	-196.919	56.0854	22.2428	-2.682	929.43	74.145	0.837	357.621	-2.023	58.608	0.989	310.17	-1.252	47.628	1.258
2021-01-08 09:00:00	282.949											-2.61544	0	5012.36	-15.3254	-28.936	-208.018	59.5293	23.4705													4953.69	-14.9405	-28.2153	-202.098	58.7412	23.6241	-2.53	929.461	73.537	0.784	137.973	-2.867	69.22	1.752	296.322	-1.095	47.66	3.16
2021-01-08 10:00:00	377.285											0.766924	0	5138.5	-15.2994	-28.8968	-206.899	64.676	24.276													5011.33	-15.3001	-28.8905	-206.396	60.5075	24.7279	-0.977	929.726	64.553	0.999	94.58	-1.849	65.5	0.962	103.367	-0.853	52.16	0.939
2021-01-08 11:00:00	411.65											1.97891	0	5264.65	-15.2733	-28.8577	-205.78	69.8227	25.0816													4926.93	-15.3746	-29.0269	-207.414	58.9692	24.8008	0.593	930.377	57.537	1.464	84.049	-0.235	58.83	1.42	71.254	-0.388	58.027	1.248
2021-01-08 12:00:00	389.821											2.70596	0	5261.99	-15.257	-28.8229	-205.461	67.5544	25.1227													4842.54	-15.4492	-29.1633	-208.433	57.4308	24.8738	1.017	930.779	54.522	1.532	99.492	0.232	54.977	1.444	91.207	0.007	51.868	1.077
2021-01-08 13:00:00	304.482											3.39892	0	5207.22	-15.2445	-28.79	-205.465	62.2865	24.8545													4760.76	-15.4999	-29.2561	-209.318	56.4037	24.7309	1.762	930.51	50.607	1.722	106.361	0.98	51.142	1.786	104.899	0.688	48.892	1.501
2021-01-08 14:00:00	210.392											2.87507	0	5152.46	-15.232	-28.757	-205.47	57.0186	24.5864													4688.7	-15.4617	-29.1864	-209.707	57.2791	23.7844	2.133	930.051	49.793	1.703	95.804	1.35	50.412	1.829	91.573	1.068	50.36	1.722
2021-01-08 15:00:00	50.1347											0.262418	0	5135.74	-15.2529	-28.7937	-206.426	55.7151	23.9231													4616.64	-15.4235	-29.1168	-210.096	58.1545	22.8379	1.675	929.903	50.672	1.522	104.806	1.363	49.823	1.718	104.247	1.388	43.568	1.728
2021-01-08 16:00:00	2.35095											-1.9665	0	5134.37	-15.2873	-28.8584	-207.766	56.0096	23.1006													4549.81	-15.4005	-29.0753	-210.544	59.0029	22.0587	0.86	929.595	52.32	0.758	71.186	0.912	50.725	1.108	44.597	1.18	46.072	1.393
2021-01-08 17:00:00	-0.372157											-2.79541	0	5132.99	-15.3217	-28.9231	-209.107	56.3042	22.2781													4502.28	-15.4333	-29.138	-211.206	59.7514	21.8978	0.343	929.994	53.193	0.757	74.485	0.515	50.64	1.318	66.729	1.138	46.648	1.87
2021-01-08 18:00:00	-0.296991											-2.992	0	5100.67	-15.3817	-29.0387	-210.165	58.1651	22.1447													4454.75	-15.4661	-29.2007	-211.869	60.4998	21.7368	-0.108	930.127	54.998	1.126	47.123	0.273	51.08	1.39	53.804	0.863	41.133	2.406
2021-01-08 19:00:00	-0.310686											-3.11219	0	5055.86	-15.4522	-29.1749	-211.11	60.658	22.2894													4368.31	-15.5466	-29.3517	-213.123	61.006	21.6913	-0.47	930.254	56.477	0.74	30.545	0.723	42.663	1.429	49.703	1.068	36.885	2.917
2021-01-08 20:00:00	-0.398294											-3.40705	0	5011.05	-15.5226	-29.311	-212.054	63.1509	22.4341													4137.55	-15.8034	-29.8305	-216.57	60.6136	22.0741	-0.898	930.371	56.103	0.548	91.485	0.2	43.235	1.963	40.131	0.753	37.958	3.463
2021-01-08 21:00:00	-0.207519											-4.09254	0	4914.94	-15.6251	-29.5034	-213.126	63.7272	22.9011													3906.79	-16.0603	-30.3094	-220.018	60.2211	22.457	-0.561	930.765	49.94	1.243	74.55	0.413	42.715	2.7	50.645	0.795	40.457	3.86
2021-01-08 22:00:00												-3.68946	0	4798.12	-15.7405	-29.7184	-214.249	63.53	23.4981													3746.19	-16.2141	-30.5967	-222.017	60.3735	22.7566	-0.32	931.305	48.968	1.324	66.429	0.438	43.825	3.216	44.113	0.793	41.565	4.913
2021-01-08 23:00:00												-3.62693	0	4681.3	-15.8558	-29.9335	-215.372	63.3327	24.0952													3845.7	-15.9858	-30.1745	-218.648	62.5455	22.7479	-0.032	931.483	48.105	0.92	49.028	0.9	43.33	2.676	44.136	1.107	41.308	4.589
2021-01-09												-3.41653	0	4770.62	-15.81	-29.8409	-214.717	59.4858	24.0106													3945.22	-15.7574	-29.7522	-215.278	64.7176	22.7391	-0.895	931.346	53.742	0.92	5.363	0.52	45.91	2.548	38.988	1.227	41.593	3.798
2021-01-09 01:00:00												-2.88265	0	4943.13	-15.6992	-29.6242	-213.343	54.1659	23.6508													4048.14	-15.538	-29.3459	-211.945	66.5655	22.823	-1.043	931.285	56.352	0.796	264.081	1.04	45.357	1.041	28.995	1.293	41.195	2.377
2021-01-09 02:00:00	-0.16029											-2.57434	0	5115.65	-15.5883	-29.4074	-211.968	48.846	23.2909													4163.67	-15.3516	-28.9991	-208.743	67.2134	23.25	-1.728	931.276	61.402	0.924	13.506	0.733	47.538	2.43	30.87	1.238	42.323	2.923
2021-01-09 03:00:00	-0.122155											-2.25021	0	5121.03	-15.5315	-29.3005	-211.218	48.3958	23.1861													4279.21	-15.1653	-28.6522	-205.541	67.8612	23.677	-0.47	931.443	57.065	1.085	17.286	1.31	45.213	2.283	32.82	1.518	41.885	2.907
2021-01-09 04:00:00	-0.146171											-2.28578	0	5058.98	-15.4965	-29.2379	-210.719	49.9102	23.1841													4344.92	-15.0589	-28.4547	-203.602	68.4777	24.0357	-0.628	931.166	57.985	1.032	341.984	1.387	47.135	2.292	19.772	1.927	46.343	2.599
2021-01-09 05:00:00	-0.410048											-3.11324	0	4996.93	-15.4615	-29.1754	-210.221	51.4247	23.1821													4226.11	-15.2488	-28.8102	-206.34	68.9783	24.1412	-2.803	930.592	64.378	0.992	53.11	-1.385	58.888	1.458	29.71	1.513	43.775	1.703
2021-01-09 06:00:00	-0.185926											-3.15768	0	4812.16	-15.566	-29.3757	-210.724	54.3742	24.2814													4107.31	-15.4386	-29.1657	-209.079	69.479	24.2467	-1.261	929.96	54.632	0.575	135.048	0.208	48.898	1.286	196.353	1.97	37.923	1.075
2021-01-09 07:00:00	22.6448											-2.32071	0	4577.88	-15.7266	-29.6822	-211.632	57.9026	25.8249													4020.97	-15.6138	-29.4922	-211.52	69.1631	24.4179	-0.077	929.801	47.363	0.845	73.22	1.545	36.233	1.746	305.407	2.342	31.173	2.159
2021-01-09 08:00:00	88.1084											-0.864035	0	4343.61	-15.8873	-29.9886	-212.541	61.431	27.3685													4054.95	-15.7345	-29.7114	-212.859	65.8218	24.8322	-0.788	929.775	52.657	1.716	286.159	1.2	36.442	4.413	288.632	2.075	28.805	3.714
2021-01-09 09:00:00	127.55											-0.550274	0	4333.44	-15.8565	-29.9301	-211.906	60.8064	27.5348													4088.92	-15.8551	-29.9306	-214.198	62.4805	25.2465	-1.393	929.518	57.173	1.036	204.178	-1.197	50.835	3.439	279.572	0.873	35.153	4.536
2021-01-09 10:00:00	260.367											1.59476	0	4413.59	-15.7486	-29.7245	-210.65	58.5081	27.1462													4127.45	-15.92	-30.0469	-214.74	59.9015	25.6354	1.205	930.087	45.7	0.786	60.418	0.66	45.117	1.206	102.022	1.04	39.012	1.842
2021-01-09 11:00:00	405.613											3.91919	0	4493.74	-15.6408	-29.5188	-209.393	56.2099	26.7576													4182.85	-15.7781	-29.7825	-212.33	60.1455	25.93	2.723	930.922	41.885	0.976	98.232	1.717	42.84	0.83	108.293	1.52	42.563	0.976
2021-01-09 12:00:00	390.531											5.76785	0	4662.56	-15.4092	-29.0899	-206.342	58.1698	26.3776													4238.24	-15.6362	-29.518	-209.92	60.3895	26.2246	4.558	931.128	38.44	1.294	114.559	3.613	39.142	1.341	125.065	3.198	38.523	1.25
2021-01-09 13:00:00	316.977											6.28147	0	4867.15	-15.1278	-28.5709	-202.567	61.8472	26.0009													4307.44	-15.473	-29.2127	-207.421	60.1523	26.2806	4.373	930.67	41.287	1.454	346.356	3.553	41.905	1.905	308.953	3.287	41.553	1.912
2021-01-09 14:00:00	176.034											4.93204	0	5071.73	-14.8463	-28.052	-198.791	65.5247	25.6242													4427.83	-15.2305	-28.7561	-204.597	58.1313	25.4519	4.73	929.808	41.607	1.937	150.734	3.945	41.828	2.262	144.409	3.697	40.975	2.212
2021-01-09 15:00:00	34.5511											2.76794	0	5183.47	-14.7125	-27.8043	-197.372	66.7963	25.0623													4548.21	-14.9881	-28.2995	-201.773	56.1103	24.6233	3.855	928.942	44.107	1.721	135.598	3.335	44.528	2.047	137.444	3.19	43.555	2.236
2021-01-09 16:00:00	1.05995											1.38626	0	5257.87	-14.6381	-27.6657	-196.9	67.1002	24.4259													4644.7	-14.7721	-27.8924	-199.185	54.1375	23.9542	3.422	928.716	44.67	0.62	102.392	3.117	44.56	0.838	129.735	3.022	40.163	1.102
2021-01-09 17:00:00	-0.335566											1.21183	0	5332.27	-14.5636	-27.5272	-196.428	67.4041	23.7895													4653.07	-14.6536	-27.6676	-197.468	52.3423	23.8735	2.74	928.958	50.862	1.309	350.247	3.232	42.308	1.054	299.66	3.222	35.618	0.51
2021-01-09 18:00:00	-0.348762											1.10027	0	5429.31	-14.4736	-27.3564	-195.389	66.0068	23.4622													4661.44	-14.5352	-27.4429	-195.75	50.5471	23.7928	2.552	929.201	51.368	1.802	297.309	3.072	40.738	2.115	287.93	2.975	39.005	1.257
2021-01-09 19:00:00	-0.321967											0.905573	0	5535.44	-14.3774	-27.1726	-194.122	63.9263	23.2591													4698.73	-14.3876	-27.1652	-193.64	49.561	23.6817	2.92	929.447	45.862	1.948	294.225	2.983	47.878	2.302	253.428	2.85	48.363	2.672
2021-01-09 20:00:00	-0.330989											0.425542	0	5641.58	-14.2811	-26.9889	-192.855	61.8458	23.056													4842.81	-14.1326	-26.6921	-190.078	51.5631	23.4583	2.343	929.76	51.99	1.404	302.785	2.537	51.607	1.66	243.987	2.435	54.105	1.962
2021-01-09 21:00:00	-0.415039											0.532919	0	5785.04	-14.2338	-26.8974	-192.479	60.2246	22.7008													4986.88	-13.8776	-26.2189	-186.516	53.5652	23.2349	2.338	930.014	53.01	1.403	354.403	2.902	51.773	1.621	258.313	2.817	52.952	1.242
2021-01-09 22:00:00												0.887272	0	5943.51	-14.2062	-26.8431	-192.461	58.7882	22.2844													5083.34	-13.7493	-25.9835	-184.754	56.0053	23.1139	1.732	930.169	58.487	2.584	329.337	2.045	53.248	2.587	333.392	2.468	48.993	1.426
2021-01-09 23:00:00												0.360605	0	6101.99	-14.1785	-26.7888	-192.442	57.3517	21.868													5004.09	-14.0887	-26.6256	-189.634	60.0615	23.3707	1.448	930.419	56.018	1.294	47.724	1.667	49.902	2.272	38.794	1.963	48.552	2.778
2021-01-10												0.713188	0	6010.29	-14.301	-27.0162	-193.797	56.4741	22.332													4924.83	-14.4281	-27.2677	-194.514	64.1178	23.6275	1.903	930.292	52.53	1.002	328.901	1.937	48.812	1.136	93.29	1.953	46.593	1.17
2021-01-10 01:00:00												0.427502	0	5817.83	-14.484	-27.357	-195.705	55.8215	23.1505													4871.58	-14.6953	-27.7728	-198.466	67.1285	23.7167	1.597	929.714	54.378	1.765	301.979	2.29	45.857	1.485	298.797	2.557	41.863	1.199
2021-01-10 02:00:00	-0.050009											0.331692	0	5625.37	-14.667	-27.6978	-197.613	55.1689	23.9691													4914.29	-14.6958	-27.7721	-198.99	66.28	23.187	0.957	929.57	57.127	1.372	300.462	1.825	48.648	1.471	324.432	2.598	41.082	1.39
2021-01-10 03:00:00	-0.154287											0.040365	0	5705.66	-14.6859	-27.7359	-198.115	56.6941	23.7729													4956.99	-14.6963	-27.7715	-199.515	65.4316	22.6573	0.312	929.32	60.428	1.167	160.648	1.66	49.278	2.403	275.454	2.26	43.695	3.592
2021-01-10 04:00:00	-0.297918											0.047714	0	5895.72	-14.6387	-27.6522	-198.05	59.0958	23.1684													5010.28	-14.6848	-27.7471	-199.767	63.8267	22.2099	0.908	929.286	55.873	1.019	24.81	1.605	50.905	2.111	275.484	2.41	42.795	3.176
2021-01-10 05:00:00	-0.24597											0.148147	0	6085.79	-14.5916	-27.5685	-197.984	61.4974	22.5639													5102.61	-14.6292	-27.635	-199.014	59.4296	22.0667	0.618	929.023	59.605	0.853	42.348	1.115	54.025	1.138	290.589	2.012	45.34	2.158
2021-01-10 06:00:00	-0.228245											0.141191	0	6132.36	-14.3875	-27.1838	-195.746	59.7929	21.7242													5194.94	-14.5736	-27.523	-198.26	55.0324	21.9235	0.455	929.071	63.093	0.894	56.087	1.063	54.66	1.763	39.408	1.548	48.542	1.59
2021-01-10 07:00:00	6.07332											0.134231	0	6121.22	-14.1203	-26.678	-192.634	56.437	20.79													5311.22	-14.4612	-27.3069	-196.848	51.7698	21.6073	0.448	929.013	63.612	1.21	236.856	0.59	58.965	1.067	240.65	1.632	47.907	1.022
2021-01-10 08:00:00	19.3754											-0.230493	0	6110.09	-13.8531	-26.1721	-189.521	53.0811	19.8557													5515.91	-14.1392	-26.7065	-193	52.6965	20.6521	-0.838	929.243	76.47	1.284	221.16	-0.932	72.412	1.481	191.691	-0.313	65.135	1.916
2021-01-10 09:00:00	66.1433											0.284489	0	6282.32	-13.7575	-25.9921	-188.741	52.3975	19.1958													5720.6	-13.8172	-26.1062	-189.152	53.6233	19.697	-0.378	929.349	75.283	1.65	212.757	-0.94	73.742	2.849	203.791	-0.633	70.418	4.168
2021-01-10 10:00:00	107.326											1.5718	0	6528.33	-13.7309	-25.9432	-188.9	52.7892	18.6463													5994.42	-13.5697	-25.6441	-186.412	54.0066	18.7407	0.313	929.79	72.962	1.68	273.61	-0.397	73.913	3.075	277.425	-0.455	72.217	3.187
2021-01-10 11:00:00	114.111											1.55502	0	6774.35	-13.7044	-25.8943	-189.058	53.1809	18.0969													6523.3	-13.597	-25.6921	-187.756	52.3852	17.7804	0.03	930.58	84.727	1.626	277.228	-0.765	86.615	2.044	290.368	-1.057	90.475	1.792
2021-01-10 12:00:00	117.472											1.6411	0	7092.09	-13.7441	-25.9672	-190.58	52.4131	17.1575													7052.18	-13.6243	-25.7401	-189.101	50.7638	16.8201	0.155	931.134	96.248	1.262	287.314	-0.552	94.143	1.716	287.518	-0.832	98.292	1.909
2021-01-10 13:00:00	97.468											1.88673	0.186445	7438.67	-13.8104	-26.089	-192.651	51.1789	16.0613													7492.27	-13.6729	-25.8284	-190.677	49.3797	15.9508	0.515	931.388	96.783	1.521	288.792	-0.187	94.595	2.204	296.965	-0.447	99.742	2.661
2021-01-10 14:00:00	45.5825											1.44533	0	7785.25	-13.8768	-26.2109	-194.722	49.9448	14.9652													7604.84	-13.8002	-26.0655	-193.107	48.8713	15.4176	0.607	931.121	97.73	1.086	270.33	-0.108	96.42	1.464	282.896	-0.322	98.725	1.541
2021-01-10 15:00:00	21.1227											0.794373	0	7895.53	-14.0186	-26.475	-197.336	49.4076	14.464													7717.41	-13.9274	-26.3026	-195.537	48.3628	14.8843		930.842	99.9	1.24	268.347		99.9	1.625	283.561		99.9	2.475
2021-01-10 16:00:00	0.824496											0.294729	0	7910.73	-14.1907	-26.7964	-200.169	49.1508	14.2022													7796.9	-14.0122	-26.4615	-197.153	48.5913	14.5397		930.8	99.9	0.763	256.241		99.9	1.183	289.161	-0.167	98.965	2.932
2021-01-10 17:00:00	-0.238305											0.20187	0	7925.93	-14.3628	-27.1178	-203.002	48.8939	13.9404													7754.34	-13.94	-26.332	-195.764	51.5385	14.8917		931.016	99.9	0.943	59.163		99.9	1.371	56.592		99.9	2.126
2021-01-10 18:00:00	-0.277245											0.30461	0	7854.62	-14.3364	-27.0672	-202.251	48.2444	14.2864													7711.78	-13.8678	-26.2025	-194.376	54.4858	15.2436		931.109	99.9	0.983	36.315	-0.549	95.365	1.646	51.287	-0.52	97.127	2.425
2021-01-10 19:00:00	-0.208734											0.163829	0	7748.54	-14.2303	-26.8672	-200.061	47.437	14.8769													7640.64	-13.8119	-26.102	-193.266	56.7247	15.5494		931.405	99.9	0.878	49.182	-0.685	93.218	2.133	51.247	-0.745	93.332	2.804
2021-01-10 20:00:00	-0.263614											-0.126023	0	7642.46	-14.1241	-26.6672	-197.87	46.6295	15.4673													7464.13	-13.8156	-26.1083	-193.181	56.3529	15.6852	-0.85	931.942	99.9	1.745	64.215	-1.267	95.14	3.134	65.052	-0.825	96.953	3.445
2021-01-10 21:00:00	-0.173187											-0.282709	0	7478.05	-14.1675	-26.747	-198.279	45.8499	15.6975													7287.63	-13.8194	-26.1146	-193.096	55.9811	15.8211	-0.712	932.512	95.947	1.163	54.19	-0.785	88.332	2.276	61.23	-0.205	83.337	2.719
2021-01-10 22:00:00												0.002252	0	7290.19	-14.2711	-26.9393	-199.731	45.0814	15.783													7139.71	-13.8151	-26.1053	-192.977	55.2967	15.8652	-0.17	932.764	96.215	1.36	30.043	0.233	85.74	2.096	44.844	0.258	86.132	3
2021-01-10 23:00:00												-1.13342	0	7102.34	-14.3747	-27.1315	-201.184	44.3128	15.8684													7097.12	-13.7811	-26.0384	-192.736	53.4602	15.5714	-0.748	933.177	96.575	1.591	311.539	-0.105	89.413	1.642	10.125	0.493	84.857	2.423
2021-01-11												-2.3377	0	6753.92	-14.6087	-27.5726	-204.425	46.3706	16.1556													7054.52	-13.7471	-25.9715	-192.494	51.6238	15.2775	-0.414	933.378	94.207	1.149	10.976	0.255	86.12	1.541	30.912	0.972	79.922	1.548
2021-01-11 01:00:00												-2.94614	0	6341.02	-14.8951	-28.1136	-208.385	49.5631	16.5239													6964.44	-13.7593	-25.9912	-192.828	50.0093	15.1014	-0.888	933.359	95.877	0.567	40.19	0.195	85.722	0.502	5.895	1.022	78.108	0.686
2021-01-11 02:00:00	-0.313376											-3.35731	0	5928.13	-15.1814	-28.6546	-212.344	52.7556	16.8921													6699.57	-13.941	-26.3296	-195.278	49.212	15.3588	-1.758	933.388	99.872	0.834	39.487	-0.343	85.322	1.362	347.498	0.843	78.463	2.196
2021-01-11 03:00:00	-0.300497											-3.84123	0	5654.91	-15.3834	-29.0328	-215.184	53.2949	17.0786													6434.71	-14.1228	-26.6681	-197.728	48.4147	15.6162	-2.263	933.42	98.305	0.865	38.209	-0.883	89.495	0.572	359.218	0.218	83.568	1.621
2021-01-11 04:00:00	-0.328917											-4.2106	0	5437.71	-15.5515	-29.3458	-217.574	52.7699	17.1921													6193.76	-14.2876	-26.9755	-200.006	48.0828	15.7977	-2.753	933.668	93.695	1.224	34.614	-1.613	94.082	1.036	359.538	-0.746	90.91	1.108
2021-01-11 05:00:00	-0.418264											-4.49168	0	5220.52	-15.7196	-29.6588	-219.965	52.2449	17.3056													6040.84	-14.3895	-27.1686	-201.649	49.4632	15.7002	-1.727	933.541	90.537	0.892	329.507	-0.932	84.857	0.573	172.842	-0.238	79.76	0.464
2021-01-11 06:00:00	-0.218523											-4.92886	0	5261.28	-15.7552	-29.7266	-220.022	53.0508	17.7913													5887.92	-14.4915	-27.3618	-203.292	50.8437	15.6026	-3.066	933.319	92.212	0.926	281.332	-1.371	88.522	0.774	261.675	-0.417	84.24	0.954
2021-01-11 07:00:00	56.9648											-5.47131	0	5405.46	-15.7376	-29.6962	-219.143	54.3902	18.4263													5809.34	-14.5594	-27.4915	-204.023	52.3127	15.9085	-3.98	933.334	90.187	0.745	27.922	-1.825	82.348	0.57	328.671	-0.225	75.797	1.569
2021-01-11 08:00:00	204.271											-3.88592	0	5549.64	-15.7201	-29.6658	-218.265	55.7296	19.0612													6004.11	-14.502	-27.3876	-201.403	54.1072	17.6976	-2.17	933.427	92.532	0.592	127.894	-1.422	84.637	1.159	333.986	-0.492	57.258	1.412
2021-01-11 09:00:00	294.825											-1.51242	0.186445	5838.17	-15.3403	-28.9553	-212.532	55.2039	19.1109													6198.88	-14.4447	-27.2837	-198.783	55.9017	19.4867	-1.212	933.566	84.78	0.634	359.079	-1.555	86.335	0.809	30.985	-0.303	76.01	1.794
2021-01-11 10:00:00	380.789											0.589952	0	6184.45	-14.8156	-27.9727	-204.855	53.9319	18.9265													6299.59	-14.3849	-27.1737	-196.597	56.8789	20.7929	-1.332	934.142	84.162	1.028	111.621	-2.092	85.247	0.976	52.364	-0.679	78.61	1.108
2021-01-11 11:00:00	368.868											2.0608	0	6530.73	-14.291	-26.9902	-197.179	52.6599	18.7421													6054.4	-14.3161	-27.0413	-196.007	54.85	20.3233	0.557	934.742	71.048	1.332	80.234	-0.321	72.313	1.483	78.483	-0.527	74.393	1.601
2021-01-11 12:00:00	394.841											3.93016	0	6281.68	-14.2626	-26.9308	-196.473	49.1396	18.9731													5809.21	-14.2472	-26.9088	-195.417	52.8211	19.8537	2.328	935.311	60.428	1.594	100.876	1.572	62.052	1.796	94.904	1.095	64.277	1.764
2021-01-11 13:00:00	327.773											5.04437	0	5794.01	-14.4331	-27.2414	-198.561	44.7182	19.3707													5639.83	-14.1717	-26.764	-194.864	50.8518	19.2481	3.243	935.484	45.94	1.339	105.506	2.4	46.688	1.386	102.986	2.018	46.862	1.398
2021-01-11 14:00:00	219.837											4.05973	0	5306.34	-14.6037	-27.5521	-200.648	40.2968	19.7682													5749.96	-14.0715	-26.5733	-194.445	49.1018	18.1409	3.748	935.09	45.228	1.674	98.124	3.058	45.868	1.853	103.786	2.795	45.832	1.853
2021-01-11 15:00:00	68.8647											2.52618	0	5414.83	-14.4043	-27.178	-198.856	39.6237	18.5681													5860.09	-13.9713	-26.3826	-194.027	47.3519	17.0336	3.578	934.517	54.903	0.986	86.056	3.243	51.15	1.085	105.565	3.197	47.828	1.148
2021-01-11 16:00:00	3.9728											-0.530075	0	5761.51	-14.057	-26.5303	-195.512	40.4482	16.7297													5968.89	-13.8741	-26.1984	-193.313	46.0368	16.2745	1.463	934.448	70.37	1.067	184.127	2.485	58.147	1.065	176.319	2.347	53.113	0.828
2021-01-11 17:00:00	-0.341462											-1.91178	0	6108.19	-13.7098	-25.8826	-192.169	41.2727	14.8913													6072.83	-13.7881	-26.0381	-191.52	46.3058	16.784	1.02	934.694	73.146	2.6	291.123	2.418	56.508	1.121	289.015	2.146	54.754	0.515
2021-01-11 18:00:00	-0.280209											-2.55118	0	6052.54	-13.7902	-26.0346	-193.402	42.2603	14.8752													6176.77	-13.702	-25.8777	-189.728	46.5748	17.2934	0.987	935.347	71.93	1.6	329.315	1.643	62.327	1.242	26.074	1.673	57.032	1.125
2021-01-11 19:00:00	-0.306169											-3.33825	0	5836.12	-14.0413	-26.5062	-196.462	43.313	15.5872													6160.81	-13.6996	-25.875	-189.143	47.5592	17.8578	0.185	935.55	73.437	0.999	15.656	0.443	67.415	0.799	70.018	0.823	60.838	0.768
2021-01-11 20:00:00	-0.351356											-3.75978	0	5619.7	-14.2925	-26.9778	-199.523	44.3657	16.2992													5705.66	-14.0037	-26.4501	-192.977	51.1643	18.6237	-0.102	935.712	68.295	1.066	40.235	-0.063	61.975	0.915	77.541	0.217	53.852	0.856
2021-01-11 21:00:00	-0.035095											-4.23151	0	5395.07	-14.4804	-27.3302	-201.544	44.9576	17.097													5250.5	-14.3077	-27.0252	-196.812	54.7694	19.3896	-1.174	935.99	69.642	0.953	33.371	-0.894	64.343	0.99	32.624	-0.423	60.087	1.024
2021-01-11 22:00:00												-4.52693	0	5167.15	-14.643	-27.6348	-203.15	45.3651	17.9291													4871.98	-14.5662	-27.5133	-200.13	57.3163	19.9765	-1.998	936.117	64.615	1.208	58.834	-1.617	66.255	0.966	47.992	-0.177	64.502	0.83
2021-01-11 23:00:00												-4.74245	0	4939.23	-14.8056	-27.9395	-204.755	45.7727	18.7612													4774.21	-14.658	-27.6824	-201.552	55.9857	19.9075	-1.43	936.211	66.812	1.296	326.109	-0.535	60.63	0.978	19.764	0.087	57.045	1.158
2021-01-12												-4.60145	0	4792.82	-14.9155	-28.1496	-206.022	48.361	19.1757													4676.45	-14.7497	-27.8515	-202.973	54.6551	19.8385	-1.198	936.519	62.857	1.402	341.717	0.302	52.727	1.246	341.412	0.725	48.473	1.287
2021-01-12 01:00:00												-5.16472	0	4678.99	-15.0043	-28.322	-207.153	51.8209	19.4232													4565.33	-14.846	-28.0311	-204.377	54.4981	19.872	-3.458	936.717	73.205	0.914	152.486	-2.197	62.47	1.152	98.156	-0.403	53.102	0.842
2021-01-12 02:00:00	-0.068713											-5.26225	0	4565.17	-15.0931	-28.4943	-208.284	55.2807	19.6707													4405.22	-14.9587	-28.2493	-205.713	58.6428	20.2815	-2.815	936.745	67.207	1.912	289.069	-0.849	55.198	2.539	298.401	-0.319	52.633	2
2021-01-12 03:00:00	-0.098465											-5.39754	0	4482.68	-15.2082	-28.7112	-209.607	56.2761	20.0819													4245.11	-15.0714	-28.4676	-207.05	62.7875	20.691	-2.852	936.966	62.032	1.798	308.748	-2.103	54.212	2.978	294.757	-1.463	47.835	3.554
2021-01-12 04:00:00	-0.386652											-6.13641	0	4412.72	-15.3338	-28.9458	-211.008	56.2865	20.5585													4116.1	-15.1654	-28.6477	-208.131	65.2846	21.0509	-5.06	937.031	77.843	1.487	351.145	-4.222	68.433	1.812	327.678	-2.397	50.977	2.292
2021-01-12 05:00:00	-0.265091											-5.69737	0	4342.76	-15.4594	-29.1804	-212.408	56.2969	21.0351													4101.11	-15.1906	-28.6882	-208.277	61.7408	21.229	-3.837	936.758	65.037	1.173	34.93	-2.892	53.64	1.56	321.338	-2.052	46.713	2.196
2021-01-12 06:00:00	-0.019978											-6.0883	0	4399.89	-15.4752	-29.2093	-212.043	56.0081	21.6311													4086.12	-15.2158	-28.7288	-208.423	58.1969	21.4071	-4.552	936.413	70.217	1.06	358.531	-3.607	61.997	1.743	5.481	-2.085	48.402	2.8
2021-01-12 07:00:00	16.6736											-5.08209	0	4507.78	-15.447	-29.156	-210.973	55.5998	22.2748																			-4.513	936.23	70.47	0.844	72.464	-2.54	54.352	1.059	105.987	-1.458	47.857	1.576
2021-01-12 08:00:00	49.2247											-3.85634	0	4615.67	-15.4189	-29.1027	-209.903	55.1914	22.9185																			-3.015	936.124	64.413	0.822	34.765	-1.138	53.528	1.41	245.547	-0.067	48.078	3.205
2021-01-12 09:00:00	76.5984											-1.01599	0																									-0.198	936.124	58.858	2.354	323.812	0.968	51.4	4.092	296.658	1.08	49.997	5.526
2021-01-12 10:00:00	180.645											0.427449	0																									1.45	936.31	59.167	1.342	225.816	1.373	55.8	2.496	265.33	1.373	54.135	3.832
2021-01-12 11:00:00	322.135											3.78645	0																									4.107	936.713	48.573	2.244	261.439	3.243	48.33	3.252	265.853	2.895	47.775	4.732
2021-01-12 12:00:00	366.06											5.96953	0																									5.533	936.956	46.932	7.382	300.632	4.537	47.45	13.041	304.039	4.16	47.28	15.27
2021-01-12 13:00:00	282.812											7.43757	0																									6.763	936.695	47.467	5.503	307.112	5.858	48.182	9.488	309.717	5.453	48.5	10.555
2021-01-12 14:00:00	173.356											5.49411	0																									6.05	936.019	54.402	5.571	324.2	5.378	55.005	9.189	323.035	5.063	55.51	11.039
2021-01-12 15:00:00	70.9223											4.54145	0																									5.642	936.148	58.91	6.194	322.735	5.127	59.168	10.444	318.947	4.853	59.728	12.181
2021-01-12 16:00:00	3.24022											3.12419	0																									4.853	935.51	63.042	6.814	314.088	4.603	62.41	12.08	310.215	4.46	62.612	14.913
2021-01-12 17:00:00	-0.358618											2.49184	0																									4.093	935.44	70.043	6.157	303.489	3.878	69.373	11.16	300.337	3.72	70.07	13.056
2021-01-12 18:00:00	-0.306119											2.39057	0																									3.788	935.632	76.338	5.551	286.133	3.625	75.412	10.024	285.763	3.548	76.083	11.999
2021-01-12 19:00:00	-0.170503											2.87786	0																									4.458	936.169	73.5	5.793	284.384	4.277	72.482	10.748	281.45	4.155	73.292	12.847
2021-01-12 20:00:00	-0.049188											3.33357	0																									4.987	936.262	72.473	7.196	283.223	4.782	71.672	13.002	286.466	4.608	72.605	14.547
2021-01-12 21:00:00	-0.380707											3.72244	0																									5.512	935.602	72.25	6.19	288.113	5.31	71.452	11.612	288.4	5.173	72.22	13.468
2021-01-12 22:00:00												4.25422	0																									6.122	935.453	71.798	6.705	295.199	5.913	71.02	12.237	295.769	5.787	71.715	14.736
2021-01-12 23:00:00												4.35189	0																									6.213	935.409	71.657	6.915	304.853	5.99	70.907	12.677	303.57	5.84	71.685	15.289
2021-01-13												4.63877	0																									6.45	935.322	71.222	7.137	301.368	6.222	70.403	13.271	303.41	6.088	71.055	16.136
2021-01-13 01:00:00												4.65441	0																									6.44	935.018	71.788	8.053	303.218	6.21	71.093	15.134	301.165	6.062	71.877	17.989
2021-01-13 02:00:00	-0.056796											4.54214	0																									6.482	934.716	72.148	7.034	302.211	6.26	71.443	12.915	302.045	6.122	72.233	15.736
2021-01-13 03:00:00	0.071267											4.51437	0																									6.48	934.641	74.29	6.37	301.063	6.283	73.555	11.578	301.617	6.117	74.733	13.97
2021-01-13 04:00:00	-0.057493											4.87416	0																									6.822	935.022	74.467	5.65	295.065	6.618	73.745	10.57	297.275	6.445	74.967	12.567
2021-01-13 05:00:00	-0.078339											5.08977	0																									7.032	935.272	74.383	5.462	287.641	6.817	73.723	9.861	290.472	6.645	74.958	11.821
2021-01-13 06:00:00	0.352103											5.09865	0																									6.947	935.325	76.078	6.183	292.975	6.733	75.393	11.075	293.617	6.595	76.583	13.049
2021-01-13 07:00:00	33.3807											5.23635	0																									7.182	935.372	74.748	6.379	292.247	6.96	73.97	11.561	291.918	6.828	74.82	13.886
2021-01-13 08:00:00	161.083											6.42952	0																									8.213	935.522	69.47	6.264	296.407	7.683	69.9	11.616	294.565	7.482	70.345	14.01
2021-01-13 09:00:00	283.777											8.17244	0																									9.258	935.994	65.7	6.743	293.01	8.353	67.448	11.898	296.23	8.012	68.508	14.155
2021-01-13 10:00:00	372.219											10.3205	0																									10	936.773	62.688	6.529	295.166	8.908	65.027	11.456	293.328	8.488	66.23	13.046
2021-01-13 11:00:00	403.525											11.401	0	10245.2	-10.0466	-18.9947	-146.913	28.2469	5.0444													9844.59	-10.1077	-19.1114	-148.524	29.6847	4.36742	10.473	937.401	60.66	6.353	292.515	9.262	63.407	10.593	293.334	8.827	64.782	11.945
2021-01-13 12:00:00	384.149											11.8915	0	10218	-10.0873	-19.0786	-147.689	32.2401	4.93993													9991.44	-9.99761	-18.9047	-147.369	29.2682	3.8687	10.603	937.846	59.792	6.423	294.609	9.412	62.488	11.17	295.337	8.938	63.945	12.41
2021-01-13 13:00:00	323.285											11.4928	0	10190.6	-10.1282	-19.1627	-148.467	36.2262	4.8349													9852.69	-10.2425	-19.3681	-151.029	31.3061	3.91576	10.198	937.975	61.07	6.639	294.773	9.1	63.57	11.341	295.207	8.68	64.847	12.684
2021-01-13 14:00:00	222.252											10.3533	0	9979.22	-10.2661	-19.4165	-151.124	33.5968	4.20774													9713.94	-10.4875	-19.8315	-154.689	33.3441	3.96282	9.863	937.513	60.823	6.864	293.377	8.9	62.852	11.782	296.728	8.52	63.94	13.252
2021-01-13 15:00:00	53.7952											8.02678	0	9767.86	-10.4039	-19.6702	-153.781	30.9675	3.58058													9606.75	-10.4693	-19.7936	-155.077	31.3327	3.2713	8.928	936.818	64.295	6.496	295.304	8.37	64.96	11.431	292.148	8.117	65.695	13.401
2021-01-13 16:00:00	3.84026											6.61521	0	9654.14	-10.4182	-19.6965	-154.249	30.6439	3.32352													9505.84	-10.3987	-19.6559	-154.814	28.5154	2.43278	8.278	936.792	66.615	6.395	291.274	7.985	66.242	11.299	293.098	7.847	66.358	13.117
2021-01-13 17:00:00	-0.266838											5.84147	0	9589	-10.3711	-19.6096	-153.626	31.4675	3.25059													9512.49	-10.2894	-19.4507	-153.229	28.4027	2.37592	7.602	937.163	69.923	5.693	292.315	7.453	68.803	10.476	293.458	7.467	68.205	12.908
2021-01-13 18:00:00	-0.295791											5.61389	0	9553.68	-10.3171	-19.5112	-152.197	32.9981	3.89216													9626.24	-10.1417	-19.1782	-150.328	30.9831	3.09741	7.352	937.253	72.603	4.858	283.469	7.192	71.642	9.017	287.469	7.107	71.798	10.952
2021-01-13 19:00:00	-0.189493											5.934	0	9577.73	-10.2495	-19.3898	-149.162	35.9367	5.95656													9686.5	-10.0361	-18.9853	-147.901	33.7611	3.9815	7.712	937.398	70.445	5.421	273.527	7.51	69.53	9.582	275.503	7.36	69.893	10.833
2021-01-13 20:00:00	-0.029462											5.85528	0	9601.52	-10.1823	-19.2691	-146.134	38.8667	8.01893													9481.61	-10.1397	-19.1866	-147.821	37.5188	5.67165	7.865	937.705	68.04	6.262	290.463	7.705	66.823	11.203	290.363	7.598	66.75	12.77
2021-01-13 21:00:00	-0.224304											6.13735	0	9454.88	-10.3584	-19.5945	-147.997	36.1612	8.75902													9276.72	-10.2432	-19.3879	-147.741	41.2764	7.3618	8.183	937.716	65.012	6.666	310.356	8.047	63.692	12.018	306.887	7.948	63.377	13.638
2021-01-13 22:00:00												6.22909	0	9308.24	-10.5345	-19.9198	-149.86	33.4557	9.49911													9144.01	-10.4774	-19.8279	-150.179	41.6375	8.44407	8.19	937.511	64.772	6.884	307.999	7.988	63.85	12.907	304.8	7.862	63.757	14.44
2021-01-13 23:00:00												6.16285	0	9101.08	-10.7481	-20.323	-152.847	34.7759	9.73662													9025.6	-10.7375	-20.3152	-153.116	41.3259	9.40595	8.148	937.097	63.202	6.679	310.004	7.963	61.942	12.334	303.336	7.935	61.033	14.382
2021-01-14												6.09782	0	8863.86	-10.9804	-20.7647	-156.393	38.0965	9.72438													8856.37	-10.9427	-20.6984	-155.693	40.3879	9.89439	7.983	936.942	61.72	7.976	311.242	7.77	60.755	14.484	307.632	7.652	60.565	16.777
2021-01-14 01:00:00												5.70641	0	8650.16	-11.1438	-21.0754	-158.746	40.3464	9.85676													8636.65	-11.0934	-20.9781	-157.913	38.8274	9.9122	7.58	936.731	62.298	8.404	309.415	7.377	61.42	15.21	307.85	7.177	61.895	17.138
2021-01-14 02:00:00	-0.167142											5.36839	0	8483.23	-11.1705	-21.1257	-158.729	40.4689	10.2765													8415.18	-11.2075	-21.1909	-159.525	38.2061	10.0024	7.257	935.88	62.713	7.987	303.413	7.037	61.975	14.044	302.699	6.835	62.53	15.345
2021-01-14 03:00:00	-0.218979											5.08896	0	8316.32	-11.1969	-21.1755	-158.708	40.5958	10.6962													8185.14	-11.1405	-21.0727	-158.132	42.2261	10.4503	7.018	935.534	61.357	8.227	301.112	6.857	60.335	13.897	300.771	6.66	60.825	14.954
2021-01-14 04:00:00	-0.240809											4.64514	0	8166.43	-11.0685	-20.9399	-156.39	43.4316	11.1289													7955.1	-11.0735	-20.9546	-156.738	46.2461	10.8982	6.692	935.548	61.152	7.295	291.234	6.66	59.653	11.742	291.451	6.535	59.72	12.812
2021-01-14 05:00:00	-0.286293											4.06191	0	8016.53	-10.94	-20.7042	-154.072	46.2673	11.5615													7890.04	-10.9067	-20.6401	-154.102	45.3396	11.0187	6.13	935.758	64.018	5.634	287.203	5.985	63.003	9.727	286.801	5.872	63.195	10.829
2021-01-14 06:00:00	0.01488											3.80619	0	7864.44	-10.845	-20.5255	-152.21	46.0093	11.9946													7857.54	-10.7202	-20.2868	-151.22	43.4608	11.0745	5.797	935.751	64.832	5.182	291.352	5.702	63.458	8.932	288.314	5.573	63.658	10.209
2021-01-14 07:00:00	48.6278											4.02732	0	7711.25	-10.7665	-20.3751	-150.573	44.218	12.4278													7715.28	-10.6666	-20.1812	-149.644	40.7078	11.8053	6.17	935.466	60.793	5.827	291.315	6.027	59.34	10.513	291.135	6	58.468	11.967
2021-01-14 08:00:00	187.48											4.90928	0	7542.7	-10.7407	-20.3232	-149.61	42.367	12.9761													7464.11	-10.7449	-20.3214	-149.365	37.0873	13.2056	6.798	935.099	54.95	5.897	319.354	6.19	54.977	10.604	314.222	6.085	53.92	12.084
2021-01-14 09:00:00	300.464											6.74436	0	7343.66	-10.8194	-20.4671	-149.985	40.3975	13.7525													7264.69	-10.8143	-20.4475	-149.047	34.9484	14.5325	7.825	934.902	50.303	5.727	322.959	6.922	51.282	10.395	319.475	6.62	51.333	12.322
2021-01-14 10:00:00	388.748											9.67831	0	7145.5	-10.8975	-20.61	-150.353	38.4334	14.5271													7320.37	-10.8396	-20.5045	-148.539	40.1128	15.497	9.222	934.859	45.275	6.685	313.022	8.095	46.68	11.356	310.207	7.662	47.017	12.974
2021-01-14 11:00:00	426.014											10.9697	0	7356.51	-10.7126	-20.2643	-147.651	38.9845	14.4635													7376.04	-10.8649	-20.5615	-148.03	45.2772	16.4614	9.79	934.852	46.005	5.691	317.093	8.533	47.938	10.104	314.093	8.063	48.457	11.748
2021-01-14 12:00:00	404.291											11.2948	0	7567.51	-10.5278	-19.9186	-144.949	39.5357	14.3999													7473.57	-10.7723	-20.3827	-147.174	42.4712	15.8871	9.923	934.857	46.535	5.891	310.393	8.713	48.323	9.968	307.18	8.228	48.788	11.751
2021-01-14 13:00:00	334.349											11.2632	0	7766.92	-10.418	-19.7081	-143.455	37.1146	14.2101													7579.33	-10.6566	-20.1574	-146.25	38.0949	15.0096	10.115	934.645	47.193	7.418	305.139	9.037	48.825	13.332	304.353	8.587	49.348	15.291
2021-01-14 14:00:00	226.177											10.133	0	7942.48	-10.3624	-19.5954	-142.877	32.549	13.8862													7685.1	-10.5408	-19.9322	-145.326	33.7187	14.132	9.908	933.751	49.025	7.741	300.189	8.98	50.365	13.961	302.479	8.61	50.778	16.061
2021-01-14 15:00:00	76.0732											8.26232	0	8006.87	-10.2264	-19.3376	-141.345	31.1928	13.3551													7790.87	-10.4251	-19.707	-144.401	29.3424	13.2545	9.14	932.481	51.682	8.465	301.492	8.517	52.285	14.664	302.333	8.195	52.758	16.191
2021-01-14 16:00:00	4.79109											6.16273	0	8071.26	-10.0903	-19.0798	-139.814	29.8365	12.8241													8006.05	-10.262	-19.4016	-142.254	29.6747	12.9584	7.552	931.96	58.853	8.244	300.497	7.173	58.902	14.813	302.769	6.965	59.398	16.592
2021-01-14 17:00:00	-0.300164											5.22239	0	8182.98	-10.0491	-19.0065	-139.413	32.0586	12.6391													8246.22	-10.0881	-19.0779	-139.828	31.0826	12.7952	6.802	931.83	64.403	8.262	303.279	6.508	64.097	14.783	303.245	6.358	64.51	17.693
2021-01-14 18:00:00	-0.319568											4.69361	0	8320.45	-10.0595	-19.0337	-139.627	36.2277	12.6424													8409.27	-10.0552	-19.0165	-139.425	31.2868	12.7064	6.42	931.999	66.13	6.968	304.543	6.247	65.312	12.118	305.919	6.202	65.237	14.956
2021-01-14 19:00:00	-0.250764											4.36074	0	8481.91	-10.199	-19.3007	-141.848	39.0831	12.5577													8489.13	-10.1742	-19.2378	-141.205	30.193	12.698	6.132	932.501	68.482	5.377	295.662	5.888	68.042	9.43	296.85	5.798	68.4	11.618
2021-01-14 20:00:00	-0.168948											4.5613	0	8695.67	-10.62	-20.0904	-148.442	39.0745	12.2814													8602.11	-10.4115	-19.6817	-144.805	29.5365	12.6483	6.322	933.165	69.325	5.58	304.989	6.083	68.83	10.18	306.442	5.99	69.245	13.033
2021-01-14 21:00:00	-0.156403											4.85982	0	8909.43	-11.041	-20.8801	-155.036	39.066	12.005													8906.22	-11.3317	-21.4101	-158.92	31.4034	12.3609	6.133	933.165	73.977	6.077	305.651	5.813	73.91	11.105	306.807	5.63	75.07	13.918
2021-01-14 22:00:00												4.14826	0	8994.29	-11.3038	-21.3748	-159.546	40.1191	11.4527													9210.34	-12.2519	-23.1385	-173.034	33.2704	12.0736	5.908	933.307	75.775	5.208	299.402	5.618	75.643	8.938	300.259	5.482	76.655	10.788
2021-01-14 23:00:00												3.70896	0	9076.66	-11.5636	-21.8638	-164.016	41.1928	10.895													9161.99	-12.2518	-23.1428	-173.545	35.5311	11.5971	5.843	933.594	74.933	3.36	309.81	5.692	73.913	5.916	313.312	5.595	74.468	7.786
2021-01-15												4.00394	0	9066.96	-11.8608	-22.4204	-168.459	41.031	10.9043													9033.27	-12.0419	-22.754	-170.954	37.8817	11.0776	5.803	933.825	74.157	4.484	297.09	5.572	73.55	8.059	299.16	5.462	74.043	10.376
2021-01-15 01:00:00												4.65459	0	9007.18	-12.1783	-23.0138	-172.888	40.1973	11.2221													8920.95	-12.0715	-22.8101	-171.658	38.2978	10.8223	5.882	933.616	73.205	5.336	307.232	5.562	72.913	9.736	307.479	5.397	73.738	12.079
2021-01-15 02:00:00	-0.098906											4.61378	0	8940.72	-12.462	-23.5425	-176.954	38.78	11.3865													8826.34	-12.3592	-23.3459	-175.916	36.6277	10.852	5.797	932.691	73.12	5.236	292.987	5.508	72.573	9.169	296.114	5.338	73.25	10.892
2021-01-15 03:00:00	-0.158193											4.67285	0	8859.69	-12.6717	-23.9302	-180.226	36.0897	11.2164													8740.73	-12.6334	-23.857	-180.035	35.2523	10.8212	5.757	932.281	72.915	3.945	290.572	5.395	72.755	7.002	291.278	5.222	73.382	8.466
2021-01-15 04:00:00	-0.362403											4.4144	0	8778.65	-12.8815	-24.318	-183.497	33.3994	11.0463													8706.97	-12.8296	-24.2249	-183.358	35.5751	10.4412	5.593	932.464	72.173	4.323	292.967	5.292	71.773	7.801	294.296	5.108	72.442	9.329
2021-01-15 05:00:00	-0.327143											4.07463	0	8693.28	-12.9431	-24.4276	-185.16	30.3521	10.2613													8673.21	-13.0258	-24.5927	-186.681	35.8978	10.0613	5.375	932.912	74.202	4.041	291.493	5.127	73.612	7.243	289.874	4.953	74.383	8.611
2021-01-15 06:00:00	-0.100003											3.4849	0	8607.82	-13.0019	-24.5321	-186.792	27.2982	9.46474													8417.33	-13.0918	-24.7192	-188.406	37.499	9.34767	5.173	932.909	73.128	4.506	292.283	5.038	71.682	8.194	292.049	4.965	71.465	9.805
2021-01-15 07:00:00	41.4273											3.50006	0	8357.65	-12.9752	-24.4842	-186.759	28.4235	9.11439													8110.99	-13.1282	-24.7908	-189.768	39.3904	8.55831	5.29	932.954	68.268	4.731	296.415	5.073	67.198	9.056	301.368	4.957	67.2	11.028
2021-01-15 08:00:00	188.181											4.78579	0	8018.05	-12.9021	-24.3536	-185.823	31.8178	9.00629													7829.18	-13.1657	-24.8595	-190.566	38.5921	8.31068	6.275	932.912	61.518	5.422	292.698	5.583	62.37	9.474	291.866	5.303	62.985	11.596
2021-01-15 09:00:00	324.793											6.94201	0	7724.24	-12.9672	-24.4792	-186.685	33.868	9.1483													7573.77	-13.2044	-24.9251	-190.755	34.8976	8.64633	7.508	933.271	54.918	4.829	303.332	6.475	56.852	8.856	302.94	6.057	57.88	10.898
2021-01-15 10:00:00	406.258											8.70302	0	7529.95	-13.3325	-25.1612	-191.456	32.9966	9.83394													7323.29	-13.3217	-25.139	-192.07	31.9053	9.04226	7.48	933.403	53.99	5.11	303.314	6.267	56.452	8.886	306.083	5.818	57.51	10.372
2021-01-15 11:00:00	397.675											9.5903	0	7335.66	-13.6979	-25.8433	-196.227	32.1252	10.5196													7101.08	-13.8902	-26.2042	-199.849	32.9443	9.78426	7.68	934.237	50.8	6.22	300.175	6.382	53.422	10.844	301.306	5.885	54.613	11.928
2021-01-15 12:00:00	402.014											9.3623	0	7137.05	-14.067	-26.5374	-201.398	34.2683	10.9019													6878.87	-14.4587	-27.2694	-207.629	33.9833	10.5263	7.28	934.363	50.537	6.055	310.228	6.01	52.992	10.231	306.988	5.473	54.21	11.818
2021-01-15 13:00:00	314.455											9.21181	0	6938.35	-14.4361	-27.2318	-206.576	36.4688	11.2785													6668.48	-14.662	-27.6462	-210.434	32.198	10.7354	6.632	934.357	51.507	6.293	307.144	5.492	53.758	10.793	303.761	5.05	54.783	12.288
2021-01-15 14:00:00	287.604											8.16167	0	6700.61	-14.5896	-27.5186	-208.643	36.3541	11.506													6460.78	-14.7823	-27.8666	-212.109	29.7705	10.8233	6.25	933.786	50.945	6.193	305.547	5.177	53.058	9.878	306.076	4.732	54.102	10.783
2021-01-15 15:00:00	115.367											5.77083	0	6441.69	-14.6262	-27.5845	-209.023	34.9845	11.6528													6233.9	-14.9133	-28.1104	-213.821	29.1992	11.0621	5.128	933.107	53.498	6.055	321.867	4.308	54.892	9.942	318.896	3.925	55.843	11.203
2021-01-15 16:00:00	15.3924											3.05254	0	6180.7	-14.7437	-27.8026	-210.538	34.1834	11.8829													5986.42	-15.0559	-28.3795	-215.573	30.6224	11.4629	3.745	932.81	55.497	6.304	303.011	3.315	55.563	10.792	305.852	3.108	55.76	12.782
2021-01-15 17:00:00	-0.381092											1.36748	0	5915.2	-15.037	-28.3514	-214.517	34.617	12.2943													5753.55	-15.2145	-28.6787	-217.558	32.2774	11.8722	2.495	932.906	58.863	6.415	308.576	2.35	57.77	10.936	312.384	2.332	57.032	13.073
2021-01-15 18:00:00	-0.330194											0.60726	0	5649.7	-15.3303	-28.9002	-218.496	35.0506	12.7056													5604.25	-15.4643	-29.1507	-220.876	35.2591	12.3299	1.862	932.862	59.467	4.928	305.764	1.91	57.562	8.975	307.74	1.893	57.008	10.816
2021-01-15 19:00:00	-0.279032											0.059402	0	5561.31	-15.5302	-29.2822	-221.225	39.7936	13.0323													5454.95	-15.7141	-29.6227	-224.194	38.2408	12.7877	1.608	932.846	59.672	4.613	297.511	1.72	57.5	8.436	304.633	1.957	55.878	9.758
2021-01-15 20:00:00	-0.319034											-0.606155	0	5476.17	-15.7284	-29.6612	-223.932	44.6156	13.3575													5417.5	-15.8318	-29.8535	-225.988	44.2225	12.8402	1.19	933.31	61.205	3.899	308.623	1.597	58.013	7.719	312.116	1.713	56.927	9.019
2021-01-15 21:00:00	-0.05188											-1.47239	0	5450.74	-15.8043	-29.8085	-224.985	47.6778	13.4827													5405.36	-15.9197	-30.0297	-227.437	50.8833	12.801	1.122	933.76	61.607	2.884	298.895	2.292	55.577	5.706	304.507	2.912	52.72	6.134
2021-01-15 22:00:00												-1.53103	0	5457.66	-15.8139	-29.8302	-225.142	49.7866	13.4996													5416.65	-15.9471	-30.0813	-227.693	51.1131	12.9575	0.815	934.099	63.057	3.02	310.332	1.738	57.632	5.256	323.343	2.643	53.83	3.74
2021-01-15 23:00:00												-1.39918	0	5471.68	-15.8221	-29.8447	-225.116	49.2663	13.6417													5453.11	-15.9095	-29.999	-226.668	44.4346	13.3245	0.128	934.873	67.107	2.713	304.403	1.218	60.452	5.182	303.685	2.047	56.688	4.535
2021-01-16												-1.46804	0	5501.11	-15.8275	-29.8432	-224.69	43.0435	14.0556													5477.78	-15.8899	-29.9533	-225.972	39.4849	13.6543	0.092	935.625	67.412	3.359	287.962	0.767	62.538	5.09	291.583	1.862	57.108	5.069
2021-01-16 01:00:00												-1.38956	0	5530.55	-15.8328	-29.8418	-224.265	36.8207	14.4695													5435.14	-15.9724	-30.1163	-227.158	44.4018	13.7726	-0.063	936.384	67.898	3.354	292.733	0.373	64.027	6.018	291.632	1.308	58.668	6.705
2021-01-16 02:00:00	-0.048901											-2.64944	0	5456.9	-15.8592	-29.8994	-224.829	41.3568	14.366													5392.5	-16.0549	-30.2793	-228.344	49.3186	13.8908	-0.232	936.748	67.437	3.382	292.796	0.272	63.318	6.574	292.558	0.485	61.778	6.996
2021-01-16 03:00:00	-0.222944											-2.88372	0	5381.39	-15.886	-29.9581	-225.412	46.0883	14.2531													5299.96	-16.128	-30.4111	-229.177	46.7717	14.1116	-0.712	937.188	69.57	1.963	332.254	-0.368	65.838	4.188	315.381	0.422	60.08	5.042
2021-01-16 04:00:00	-0.357486											-3.19924	0	5267.39	-15.9264	-30.0309	-225.94	44.6427	14.307													5196.13	-16.1989	-30.5357	-229.93	42.5339	14.3555	-0.814	937.514	67.617	3.089	302.634	-0.24	63.15	5.868	297.844	0	60.98	6.718
2021-01-16 05:00:00	-0.266548											-3.73766	0	5132.56	-15.9742	-30.1113	-226.439	39.852	14.4513													5118.02	-16.2668	-30.6597	-230.811	41.1491	14.4665	-0.608	937.629	66.28	2.195	319.232	0.012	62.385	4.034	317.699	0.252	62.028	4.991
2021-01-16 06:00:00	0.0153											-4.39914	0	5090.34	-15.9871	-30.1318	-226.211	37.8424	14.8435													5067.55	-16.3312	-30.783	-231.83	42.8295	14.4345	-0.228	937.547	64.735	2.276	332.469	-0.342	64.292	3.379	354.329	-0.45	64.497	3.086
2021-01-16 07:00:00	47.8638											-4.50044	0	5249.11	-15.9244	-30.022	-224.403	41.868	15.7737													5057.62	-16.3528	-30.8262	-232.105	44.317	14.5041	-0.488	937.731	65.215	1.49	310.602	-0.604	64.092	1.296	341.462	-0.598	61.785	1.517
2021-01-16 08:00:00	190.322											-2.541	0	5407.89	-15.8616	-29.9123	-222.594	45.8936	16.7039													5280.24	-16.1292	-30.4094	-228.119	44.6977	15.1563	0.31	937.95	65.605	0.734	342.207	-0.078	63.452	0.676	353.24	0.3	58.507	1.481
2021-01-16 09:00:00	301.337											0.560716	0	5581.44	-15.6853	-29.5827	-219.872	45.6876	16.7892													5502.86	-15.9055	-29.9927	-224.133	45.0784	15.8085	1.007	938.243	64.643	1.053	76.87	0.207	66.245	1.161	36.685	0.29	64.157	1.258
2021-01-16 10:00:00	392.044											4.08688	0	5755.26	-15.5069	-29.249	-217.133	45.4037	16.8589													5660.69	-15.5486	-29.3273	-218.938	45.761	15.6805	2.605	938.581	57.913	1.577	121.903	1.697	59.788	1.666	122.168	1.417	60.643	1.418
2021-01-16 11:00:00	239.476											4.75856	0	5938.48	-15.144	-28.5711	-211.652	45.4054	16.916													5803.84	-15.1614	-28.6055	-213.468	46.5119	15.3757	2.853	939.099	59.827	1.437	139.26	1.962	61.702	1.498	146.854	1.767	61.802	1.618
2021-01-16 12:00:00	331.936											5.47985	0	6126.78	-14.6812	-27.7065	-204.686	45.5618	16.9661													5830.64	-14.8836	-28.0863	-209.078	46.2666	15.6124	3.423	939.736	59	1.944	164.661	2.423	61.245	2.376	171.315	2.122	61.905	2.146
2021-01-16 13:00:00	357.233											7.78939	0	6205.64	-14.3265	-27.0425	-199.402	44.8718	16.9379													5732.4	-14.7236	-27.7848	-205.847	44.9507	16.4309	4.78	939.726	51.312	1.642	204.479	3.843	53.135	1.905	208.19	3.497	53.857	1.923
2021-01-16 14:00:00	189.147											5.86859	0	6046.91	-14.2067	-26.8138	-197.771	42.3441	16.7395													5634.54	-14.5637	-27.4844	-202.756	44.1007	17.119	4.513	939.432	51.193	1.639	213.559	3.572	52.977	1.963	211.953	3.263	53.35	1.978
2021-01-16 15:00:00	59.7212											2.99953	0	5888.17	-14.0869	-26.5851	-196.139	39.8164	16.5411													5538.9	-14.4048	-27.1907	-200.466	45.9207	17.0594	2.9	939.17	59.062	1.887	209.47	2.427	58.338	2.322	217.194	2.512	55.708	2.373
2021-01-16 16:00:00	8.27085											0.677559	0	5363.88	-14.4753	-27.3097	-201.141	39.0834	17.3365													5443.25	-14.2459	-26.897	-198.176	47.7407	16.9998	2.187	939	54.918	2.678	261.413	2.397	51	3.96	259.351	2.505	48.152	3.982
2021-01-16 17:00:00	-0.305614											-0.55439	0	4833.09	-14.8727	-28.0513	-206.261	38.3823	18.1495													4778.61	-15.1557	-28.5833	-210.108	40.8571	18.5582	2.095	938.907	47.687	3.424	279.315	2.528	43.938	6.007	283.89	2.552	41.753	7.189
2021-01-16 18:00:00	-0.26558											-1.52841	0	4332.65	-15.5801	-29.3795	-214.874	42.4711	20.1622													3985.62	-16.3066	-30.7162	-225.248	32.0102	20.4815	1.915	938.81	40.265	3.247	307.987	2.205	37.273	5.319	308.139	2.283	34.827	6.549
2021-01-16 19:00:00	-0.334279											-2.28446	0	3848.65	-16.4552	-31.0252	-225.377	49.1514	22.8241													3355.32	-17.3969	-32.7443	-240.039	28.8935	21.9156	1.722	938.862	36.348	2.132	308.666	2.128	33.28	4.36	311.297	2.398	30.167	5.696
2021-01-16 20:00:00	-0.085534											0.225208	0	3431.88	-17.0656	-32.1676	-233.578	50.8211	23.7622													2899.34	-18.4221	-34.6601	-254.455	31.9169	22.8254	2.812	938.943	29.4	1.094	245.086	3.03	26.71	3.582	299.978	3.178	23.963	5.737
2021-01-16 21:00:00	-0.121307											1.40431	0	3160.76	-17.1029	-32.22	-236.793	41.6384	20.9668													2625.68	-18.9737	-35.69	-262.664	33.5402	22.8564	3.59	938.981	24.403	3.684	314.831	3.568	23.08	9.025	311.727	3.443	21.68	11.512
2021-01-16 22:00:00												1.25498	0	2889.64	-17.1402	-32.2725	-240.008	32.4557	18.1715													3393.6	-16.8195	-31.6597	-235.411	27.1647	17.8667	3.098	938.677	33.42	4.436	315.243	3.013	33.087	7.904	309.998	3.052	32.677	9.051
2021-01-16 23:00:00												1.90755	0	4456.17	-14.8759	-28.0357	-209.581	30.2172	14.7039													4161.53	-14.6653	-27.6294	-208.158	20.7892	12.877	3.282	938.148	47.388	5.55	304.225	3.105	47.497	9.946	300.264	3.267	48.397	11.768
2021-01-17												1.86723	0	6054.67	-12.5715	-23.7242	-178.569	28.0996	11.2246													5766.5	-12.8886	-24.3097	-183.067	23.4871	11.4108	2.527	938.071	72.357	5.98	302.366	2.198	72.943	10.885	301.757	2.095	74.945	12.296
2021-01-17 01:00:00												1.0979	0	7282.66	-11.4101	-21.5573	-162.356	31.3551	10.1018													7559.87	-11.1968	-21.15	-158.462	28.2272	10.7376	1.988	937.476	97.907	5.772	300.592	1.777	92.577	9.805	299.981	1.757	96.908	10.732
2021-01-17 02:00:00	-0.031096											1.98743	0.186445	8310.95	-10.8647	-20.5463	-154.121	37.5069	10.2491													8577.43	-10.3739	-19.6167	-146.486	32.3776	10.4469	2.707	937.07	97.242	4.384	310.784	2.488	90.802	8.474	300.88	2.428	94.162	10.415
2021-01-17 03:00:00	0.015091											2.31601	0	9031.92	-10.5226	-19.9121	-149.095	41.3163	10.202													8763.53	-10.4823	-19.8264	-148.045	35.8959	10.5659	3.24	936.814	91.442	3.929	294.48	2.968	88.228	7.658	289.628	2.785	92.905	9.043
2021-01-17 04:00:00	-0.016924											2.34148	0	9087.02	-10.621	-20.0945	-151.022	40.0502	9.73378													8895.04	-10.6134	-20.0783	-150.077	39.0679	10.5491	3.25	936.595	93.672	4.564	277.756	2.91	90.957	7.752	279.248	2.723	97.197	9.139
2021-01-17 05:00:00	-0.013048											2.56657	0	9142.12	-10.7195	-20.2769	-152.949	38.7842	9.26556													8715.67	-10.8743	-20.5698	-154.8	40.2677	9.75848	3.647	936.212	86.33	2.865	256.785	3.317	85.328	4.658	261.6	3.105	90.053	5.681
2021-01-17 06:00:00	0.104765											1.22986	0	8729.04	-11.1395	-21.06	-159.374	36.4634	9.10591													8536.3	-11.1353	-21.0614	-159.523	41.4676	8.96782	3.695	935.976	80.948	2.747	256.072	3.632	79.16	4.066	256.679	3.468	81.527	4.657
2021-01-17 07:00:00	50.019											1.89094	0	8307.59	-11.5653	-21.8539	-165.879	34.1238	8.95179													8206.47	-11.594	-21.918	-166.654	39.815	8.6901	3.978	935.744	75.255	3.408	242.101	3.875	73.452	5.403	238.446	3.777	74.168	5.68
2021-01-17 08:00:00	190.122											3.11326	0	8118.24	-11.8429	-22.371	-169.94	32.3685	9.0274													7842.66	-12.0974	-22.8571	-174.328	37.5181	8.52826	4.975	935.333	67.44	3.96	244.056	4.427	67.458	6.212	243.257	4.242	67.927	6.61
2021-01-17 09:00:00	303.345											5.02162	0	8054.39	-12.0405	-22.7385	-172.681	30.9292	9.22724													7493.16	-12.4507	-23.5172	-179.509	36.5087	8.62817	5.843	935.008	63.04	5.061	271.566	4.908	64.662	7.199	271.122	4.558	65.912	7.48
2021-01-17 10:00:00	421.356											7.98302	0	7778.09	-12.2484	-23.124	-175.608	28.8443	9.38376													7159.02	-12.6431	-23.878	-182.015	36.8809	9.00893	6.963	935.212	55.625	4.248	275.734	5.832	57.477	6.142	272.16	5.415	58.413	6.647
2021-01-17 11:00:00	350.235											8.60531	0	7042.53	-12.4785	-23.5487	-178.943	25.3637	9.44667													6810.66	-12.8127	-24.1943	-184.214	36.1314	9.34111	7.083	935.271	47.5	4.576	297.559	6.02	48.8	7.166	293.219	5.638	49.323	8.229
2021-01-17 12:00:00	181.389											6.42577	0	6306.96	-12.7087	-23.9733	-182.277	21.8831	9.50958													6381.21	-12.8531	-24.2568	-184.658	28.9902	9.39648	6.765	935.78	46.783	4.926	304.497	6.05	47.227	8.2	308.893	5.707	47.448	9.303
2021-01-17 13:00:00	337.468											8.88565	0	6021.68	-12.8148	-24.1714	-183.667	21.6178	9.70437													5951.76	-12.8936	-24.3192	-185.102	21.849	9.45184	7.267	935.983	43.628	4.272	304.855	6.258	44.782	7.517	311.08	5.853	44.975	9.212
2021-01-17 14:00:00	235.815											7.08119	0	5744.01	-12.9188	-24.3656	-185.024	21.4068	9.90139													5786.44	-12.9054	-24.3345	-185.694	18.1306	8.98229	6.728	935.482	42.058	5.508	330.955	5.958	42.583	9.555	329.471	5.603	42.465	11.17
2021-01-17 15:00:00	82.5511											5.4211	0	5815.69	-12.7364	-24.0253	-182.826	22.0695	9.3769													5680.42	-12.9108	-24.3393	-186.319	15.1807	8.39488	6.043	934.867	45.993	7.952	341.156	5.5	46.262	14.109	340.129	5.19	46.378	16.453
2021-01-17 16:00:00	6.07817											3.146	0	6075.62	-12.3997	-23.3969	-178.712	23.203	8.46363													5596.72	-12.717	-23.9782	-183.491	16.2776	8.33455	4.448	934.491	56.58	6.834	328.813	4.088	56.568	11.694	327.295	3.873	56.745	13.394
2021-01-17 17:00:00	-0.299904											2.01502	0	6115.55	-12.2192	-23.0602	-176.234	23.8575	8.24748													5536.9	-12.31	-23.2262	-176.972	21.7006	8.83769	3.497	934.721	54.882	6.7	321.617	3.255	54.172	11.838	317.283	3.127	53.668	14.398
2021-01-17 18:00:00	-0.256682											1.19978	0	5680.59	-12.3758	-23.3528	-177.286	23.4779	9.53616													5449.97	-12.0259	-22.7032	-172.304	26.6526	9.32132	3.39	935.928	51.06	7.211	320.335	3.273	49.907	12.69	317.491	3.228	49.015	14.895
2021-01-17 19:00:00	-0.114521											1.72508	0	5245.62	-12.5325	-23.6455	-178.339	23.0983	10.8248													5209.38	-12.4379	-23.4789	-178.137	28.9343	9.6943	3.948	936.51	47.938	5.084	337.792	3.933	46.347	8.877	331.32	3.848	45.603	10.56
2021-01-17 20:00:00	-0.027498											1.9909	0	5030.84	-12.7369	-24.0201	-180.921	18.7211	11.2396													4968.79	-12.8498	-24.2547	-183.97	31.2159	10.0673	3.802	937.173	46.428	6.916	341.326	3.652	45.152	12.057	338.422	3.632	43.743	13.386
2021-01-17 21:00:00	-0.087738											0.594621	0	4819.8	-12.9421	-24.396	-183.529	14.2762	11.6396													4746.97	-13.0367	-24.5973	-186.037	27.3337	10.7417	3.213	938.518	46.365	7.208	325.628	3.195	44.982	14.583	329.102	3.09	44.225	16.614
2021-01-17 22:00:00												0.489227	0	4660.04	-13.098	-24.6935	-185.278	17.337	12.2697													4529.36	-13.173	-24.8428	-187.259	22.0696	11.4837	3.097	938.094	44.792	3.54	297.677	3.232	42.617	6.956	306.784	3.245	40.933	8.451
2021-01-17 23:00:00												-0.226547	0	4527.87	-13.2273	-24.9488	-186.566	24.4352	13.0238													4428.07	-13.2317	-24.9474	-187.546	19.2677	12.0332	2.463	938.622	45.638	4.361	305.055	3.15	41.003	8.498	314.608	3.48	37.437	10.038
2021-01-18												0.136401	0	4451.06	-13.2782	-25.0518	-187.143	28.7325	13.2721													4451.04	-13.2074	-24.9016	-186.836	19.0967	12.3771	1.985	938.732	48.505	3.887	302.402	2.563	43.873	7.448	304.126	2.895	40.037	7.525
2021-01-18 01:00:00												-0.958583	0	4493.59	-13.1597	-24.8269	-186.185	26.9932	12.4302													4473.21	-13.1815	-24.8548	-186.189	20.0262	12.6497	1.728	939.152	49.297	4.292	296.92	1.853	46.952	7.707	301.514	2.213	43.433	8.103
2021-01-18 02:00:00	-0.335908											-2.54177	0	4536.11	-13.0412	-24.6019	-185.227	25.2539	11.5883													4490.82	-13.1464	-24.8024	-185.899	27.1631	12.5201	1.61	939.224	48.54	2.017	4.258	1.89	45.182	4.074	338.804	2.067	42.715	4.854
2021-01-18 03:00:00	-0.116837											-1.47171	0	4601.76	-13.1089	-24.7304	-185.301	26.1421	12.5425													4508.42	-13.1114	-24.75	-185.609	34.2999	12.3906	0.85	939.489	53.935	2.715	313.664	1.437	50.065	3.34	323.268	1.595	48.24	2.604
2021-01-18 04:00:00	-0.053108											-1.39579	0	4667.77	-13.1797	-24.8645	-185.39	27.0721	13.5253													4483.76	-13.2593	-25.0202	-187.45	30.6932	12.7109	0.997	939.946	52.797	4.152	302.911	1.428	49.227	8.002	302.752	1.793	46.048	9.506
2021-01-18 05:00:00	-0.178092											-2.20067	0	4653.62	-13.3102	-25.1104	-186.867	28.0197	14.0164													4449.61	-13.4483	-25.3627	-189.77	24.676	13.1322	0.922	939.916	51.71	3.044	329.093	1.277	49	6.804	323.55	1.71	45.582	9.272
2021-01-18 06:00:00	0.431549											-1.35622	0	4596.33	-13.4729	-25.4166	-189.09	28.9766	14.2429													4458.67	-13.5332	-25.5147	-190.838	20.9927	13.2801	1.24	939.611	50.432	2.324	344.058	1.695	47.032	5.871	329.285	1.82	45.015	7.809
2021-01-18 07:00:00	54.2289											-0.716672	0	4583.62	-13.5746	-25.6075	-190.327	29.2851	14.5337													4513.86	-13.5069	-25.4633	-190.57	19.8017	13.1359	1.423	939.614	51.502	3.272	317.534	1.615	48.557	7.446	316.403	1.837	45.492	8.932
2021-01-18 08:00:00	193.866											1.05152	0	4666.97	-13.5451	-25.5503	-189.439	28.1967	14.9634													4579.52	-13.4701	-25.3938	-190.07	19.3503	13.0797	2.797	939.768	47.167	4.534	313.684	2.13	47.12	8.847	313.783	2.442	42.28	9.528
2021-01-18 09:00:00	309.029											3.12497	0	4750.32	-13.5155	-25.493	-188.551	27.1082	15.393													4704.47	-13.3745	-25.2217	-188.251	23.0916	13.5223	3.595	940.008	46.745	4.388	322.202	2.762	47.145	8.385	320.648	2.937	43.27	8.532
2021-01-18 10:00:00	398.639											5.78552	0	4950.77	-13.3667	-25.2083	-185.461	23.7654	16.2058													4829.42	-13.2788	-25.0496	-186.432	26.8328	13.9648	4.413	940.346	44.812	2.287	91.967	3.295	46.673	3.259	66.936	3.033	46.62	4.042
2021-01-18 11:00:00	431.983											8.51726	0	5153.14	-13.2159	-24.9198	-182.334	20.3856	17.0249													4879.7	-13.2344	-24.9678	-184.897	27.5344	14.8447	6.328	940.813	40.457	1.993	122.191	5.195	41.855	2.384	119.931	4.777	41.813	2.379
2021-01-18 12:00:00	417.988											9.01649	0	5232.14	-13.1195	-24.7409	-180.525	21.1324	17.4024													4913.3	-13.2015	-24.9061	-183.427	27.5572	15.8222	7.108	941.376	38.477	2.44	113.767	6.05	39.667	2.809	114.952	5.565	39.578	2.77
2021-01-18 13:00:00	353.231											9.82481	0	5244.86	-13.0524	-24.6208	-179.423	24.0957	17.5428													5007.02	-13.0936	-24.7006	-181.286	25.6004	16.3192	7.402	941.513	37.535	2.282	116.707	6.427	38.715	2.691	120.66	6.142	38.415	2.623
2021-01-18 14:00:00	233.018											8.92396	0	5314.34	-12.9044	-24.3489	-177.513	26.9046	17.2778													5164.82	-12.9059	-24.3417	-178.43	21.5336	16.3039	7.695	941.291	38.453	2.205	135.174	6.823	39.572	2.82	138.684	6.592	39.27	3.015
2021-01-18 15:00:00	88.5151											7.10657	0	5505.7	-12.5827	-23.751	-173.866	29.3818	16.1422													5330.57	-12.6974	-23.9484	-175.455	19.9107	16.1323	7.44	941.032	41.05	1.577	206.528	6.678	41.897	1.827	200.508	6.382	41.748	1.989
2021-01-18 16:00:00	7.28246											2.95108	0	5697.06	-12.2609	-23.1531	-170.218	31.8591	15.0065													5541.05	-12.3724	-23.3621	-171.815	32.0416	15.0813	5.225	940.934	50.352	1.786	202.304	5.133	48.8	2.56	201.281	5.15	45.937	2.459
2021-01-18 17:00:00	-0.336863											-0.066532	0	5552.3	-12.3814	-23.3732	-172.613	28.8594	14.3727													5751.53	-12.0473	-22.7757	-168.175	44.1725	14.0303	3.918	941.156	52.95	2.661	255.272	4.457	47.683	3.894	253.821	5.02	42.388	3.939
2021-01-18 18:00:00	-0.344469											-0.9245	0	5402.08	-12.5091	-23.6066	-175.106	25.7709	13.7469													5577.54	-12.2575	-23.157	-171.335	37.4317	13.9207	3.31	941.465	53.21	3.036	280.382	4.573	46.457	3.452	282.041	4.603	45.062	1.376
2021-01-18 19:00:00	-0.272301											-1.79782	0	5289.28	-12.5955	-23.7672	-176.777	25.1054	13.3609													5317.8	-12.5872	-23.7542	-176.012	26.4817	14.021	3.447	941.899	50.95	3.05	298.465	4.292	46.94	1.671	310.664	3.887	47.903	0.809
2021-01-18 20:00:00	-0.367862											-2.49663	0	5196.51	-12.6598	-23.8889	-178.008	25.7375	13.1033													5202.37	-12.7257	-24.0087	-178.103	23.8513	13.9672	3.015	942.256	52.328	2.272	313.883	3.088	52.01	0.962	315.513	3.27	50.903	0.465
2021-01-18 21:00:00	-0.65918											-3.0539	0	5158.04	-12.6746	-23.9178	-178.656	26.3993	12.6863													5240.47	-12.6609	-23.8988	-177.441	30.0721	13.7494	2.33	942.585	53.71	1.241	30.01	2.673	51.978	1.379	35.314	2.85	51.072	1.348
2021-01-18 22:00:00												-3.54737	0	5236.24	-12.5829	-23.7474	-178.052	27.1249	11.9269													5287.86	-12.5882	-23.7717	-176.626	34.9017	13.5477	1.162	942.814	63.682	1.279	25.241	1.355	62.718	1.726	32.66	2.388	55.415	1.483
2021-01-18 23:00:00												-3.83141	0	5314.44	-12.4912	-23.577	-177.449	27.8504	11.1674													5387.5	-12.4714	-23.5474	-174.942	31.9026	13.4369	0.75	942.97	66.278	0.977	35.97	1.825	57.932	1.142	59.019	2.908	49.813	1.465
2021-01-19												-3.80907	0	5235.76	-12.6071	-23.7883	-178.276	24.7149	12.0296													5487.14	-12.3546	-23.3231	-173.259	28.9034	13.326	0.268	943.067	65.735	0.764	22.45	1.173	59.368	0.597	35.262	2.503	48.427	1.604
2021-01-19 01:00:00												-4.1152	0	5154.58	-12.7263	-24.0056	-179.127	21.5176	12.9177													5318.56	-12.5825	-23.7446	-176.176	26.0695	13.7808	0.438	943.212	62.077	0.633	72.086	1.692	55.667	1.028	49.169	2.818	47.773	1.737
2021-01-19 02:00:00	-0.110347											-4.39228	0	5055.92	-12.9103	-24.3493	-180.882	21.1629	13.9121													5090.15	-12.8873	-24.3102	-180.12	23.2724	14.3619	0.54	943.152	59.502	0.65	174.181	1.61	54.058	1.372	32.337	2.455	50.713	2.194
2021-01-19 03:00:00	-0.128206											-4.58902	0	4947.89	-13.129	-24.7608	-183.123	22.3338	14.9634													4905.06	-13.1481	-24.7954	-183.524	21.698	14.8393	1.128	942.887	55.508	1.081	6.658	2.202	49.982	1.962	48.565	2.452	47.568	2.299
2021-01-19 04:00:00	-0.040144											-4.47194	0	4853.15	-13.317	-25.1169	-185.103	24.5546	15.8315													4766.1	-13.3619	-25.195	-186.354	21.4264	15.2063	1.142	942.917	54.282	0.96	352.155	2.098	48.918	1.809	46.714	2.607	44.998	2.275
2021-01-19 05:00:00	-0.174961											-4.53094	0	4786.98	-13.4392	-25.3537	-186.524	29.0314	16.3057													4641.4	-13.555	-25.557	-188.927	21.7873	15.5286	0.742	942.679	55.167	0.792	16.618	1.878	48.85	1.675	49.358	2.497	43.918	3.148
2021-01-19 06:00:00	0.274284											-4.62082	0	4720.81	-13.5613	-25.5905	-187.944	33.5082	16.7799													4596.82	-13.6317	-25.7077	-190.062	25.7008	15.6002	0.345	942.455	56.125	0.558	209.411	1.722	48.403	1.032	60.588	2.298	42.313	2.784
2021-01-19 07:00:00	51.3349											-4.27466	0	4930.9	-13.6239	-25.7082	-187.616	33.8209	18.0494													4552.23	-13.7084	-25.8585	-191.196	29.6143	15.6718	0.528	942.342	55.488	0.352	80.192	2.03	46.318	1.201	50.135	2.797	39.21	2.712
2021-01-19 08:00:00	193.297											-2.59287	0	5145.38	-13.6856	-25.824	-187.26	34.0673	19.3315													4782.58	-13.7053	-25.8592	-189.764	33.1986	17.1093	0.905	942.404	58.713	0.51	197.76	1.83	48.852	0.814	57.019	2.992	38.583	2.428
2021-01-19 09:00:00	304.35											0.53488	0	5144.12	-13.8001	-26.0392	-187.972	34.6654	20.3413													5074.19	-13.6844	-25.8265	-187.761	36.7096	18.8512	2.252	942.495	56.122	0.47	183.591	2.16	50.325	0.89	25.86	3.15	37.377	2.249
2021-01-19 10:00:00	390.829											4.94791	0	5027.37	-13.9429	-26.3077	-189.256	35.4516	21.2054													5096.46	-13.7474	-25.9416	-188.111	35.1979	19.4222	4.018	942.534	44.962	1.051	95.873	3.073	43.955	0.917	65.444	3.162	36.54	2.522
2021-01-19 11:00:00	438.51											7.556	0	4954.09	-13.9565	-26.3341	-189.024	35.9577	21.6493													4832.04	-13.8998	-26.2139	-190.964	28.3399	18.7471	5.083	942.816	39.393	1.757	82.185	4.05	40.413	2.179	72.692	3.715	39.553	2.874
2021-01-19 12:00:00	405.23	41.496	41.07	43.698	43.036	40.96	7.812	7.4154	7.648	7.3428	9.344	7.87714	0	4974.12	-13.693	-25.841	-185.537	35.8624	21.1914													4606.79	-14.0087	-26.4065	-192.927	22.2732	18.3251	6.342	943.089	39.29	2.288	90.669	5.472	40.245	2.506	91.76	4.988	40.595	2.417
2021-01-19 13:00:00	353.585	38.6354	37.8658	40.1508	39.7933	36.9646	8.39533	8.17254	8.61367	8.04946	10.5363	9.83616	0	4994.15	-13.4295	-25.3479	-182.05	35.7671	20.7336													4601.24	-13.8742	-26.1519	-189.892	20.6436	19.3232	7.553	942.791	35.26	1.546	104.137	6.627	36.367	1.75	119.309	6.407	35.643	1.87
2021-01-19 14:00:00	243.657	35.5329	35.0604	38.6321	37.9029	34.7212	8.96958	8.62875	8.38183	8.07038	10.7133	8.82041	0	4870.79	-13.5063	-25.4845	-183.055	31.9119	20.8208													4595.69	-13.7397	-25.8973	-186.857	19.014	20.3213	8.018	942.178	32.335	1.718	124.511	7.153	32.99	1.965	131.406	6.943	32.26	2.144
2021-01-19 15:00:00	93.1507	37.8196	38.6808	40.6525	41.3133	38.1125	8.07879	7.21275	7.34933	6.58267	9.17675	6.6434	0	4745.16	-13.5885	-25.6311	-184.132	27.9972	20.9166													4582.35	-13.6411	-25.7186	-185.468	22.0436	20.281	7.657	941.404	34.198	1.824	143.801	7.035	34.407	2.197	148.705	6.773	33.545	2.327
2021-01-19 16:00:00	7.88116	42.5337	43.9758	48.8654	49.975	51.5662	6.22004	5.24271	3.99437	3.37433	3.712	1.57742	0	4693.35	-13.4962	-25.4554	-183.814	26.3589	19.8288													4567.28	-13.5505	-25.5567	-184.443	26.108	20.0101	6.843	940.842	36.157	1.516	109.995	6.583	35.742	1.986	119.91	6.4	35.237	1.873
2021-01-19 17:00:00	-0.41207	44.6746	46.8321	53.7092	54.9108	59.0579	5.16279	4.01479	2.33417	1.65104	1.33633	-1.03997	0	4680.92	-13.3108	-25.1077	-182.752	25.9353	18.1094													4571.16	-13.4579	-25.387	-183.473	28.0948	19.6232	6.297	940.732	37.182	1.168	103.881	6.323	35.967	1.888	118.802	6.182	37.143	1.863
2021-01-19 18:00:00	-0.383378	46.1408	47.435	55.0812	57.1671	62.6858	4.70787	3.88129	2.13338	1.19567	0.580792	-1.94281	0	4774.71	-13.0598	-24.6348	-180.92	24.2546	16.1577													4595.17	-13.363	-25.209	-182.559	27.8754	19.113	5.777	940.58	38.575	1.298	47.824	5.79	37.652	1.951	83.503	5.683	37.922	1.945
2021-01-19 19:00:00	-0.32393	54.4442	55.0979	60.115	62.1283	68.1058	3.48108	2.81542	1.56504	0.56775	-0.162167	-2.39768	0	5095.77	-12.6685	-23.894	-177.443	19.884	13.7087													4851.21	-13.0731	-24.6645	-179.13	27.111	18.1861	4.337	940.497	47.37	1.647	71.419	4.372	58.107	2.776	90.39	4.33	68.748	3.171
2021-01-19 20:00:00	-0.252473	74.6458	75.3517	77.8971	79.5175	83.9833	3.05779	2.47929	1.842	1.00604	0.22725	-1.96555	0	5416.84	-12.2772	-23.1533	-173.966	15.5134	11.2598													6405.76	-11.6918	-22.0687	-161.623	23.2961	14.9264	3.938	940.477	68.132	1.692	60.072	4.102	76.797	2.087	102.039	4.332	83.078	3.004
2021-01-19 21:00:00	-0.068665	79.8671	79.9483	82.4933	82.5217	85.5125	4.007	3.69533	3.64296	3.37733	3.40429	1.94566	0																			7960.3	-10.3104	-19.4729	-144.116	19.4812	11.6667	4.36	940.679	74.067	2.114	23.898	4.387	76.118	2.311	55.869	4.178	79.492	2.054
2021-01-19 22:00:00		73.3008	73.0717	75.2229	74.9379	76.7804	4.1615	3.90358	4.11704	3.94529	4.37587	3.41433	0																									4.423	940.788	67.323	1.888	49.512	4.233	70.202	3.511	51.867	4.253	74.75	4.144
2021-01-19 23:00:00		86.0375	85.9708	87.025	87.6458	89.7917	4.61871	4.34387	4.57342	4.40642	4.76938	3.80612	0																									4.868	940.737	82.475	2.525	39.791	4.757	83.045	4.274	51.592	4.77	89.232	5.014
2021-01-20		87.9625	87.8417	89.3	89.6292	91.5542	4.581	4.31879	4.58867	4.41667	4.84596	3.90587	0																									4.78	940.562	84.738	2.402	31.826	4.562	84.272	4.479	45.886	4.573	87.7	4.89
2021-01-20 01:00:00		89.1125	89.05	91.1083	91.3833	93.2625	4.43429	4.16137	4.39588	4.2185	4.64792	3.82279	0																									4.633	940.284	86.777	2.192	47.467	4.48	82.773	4.38	45.017	4.447	81.575	5.232
2021-01-20 02:00:00	-0.081851	84.8208	84.6583	86.8875	86.8375	89.0667	4.49658	4.23992	4.54142	4.32771	4.76588	3.90187	0																									4.7	939.688	80.113	2.548	60.286	4.337	78.9	4.67	55.495	4.153	80.635	5.514
2021-01-20 03:00:00	-0.236288	91.3667	91.6083	93.0417	93.8458	95.6875	4.19667	3.91312	4.18833	3.97267	4.44525	3.68427	0.186445																									4.468	939.182	90.258	2.828	57.712	4.202	88.068	4.68	60.085	4.02	94.367	5.32
2021-01-20 04:00:00	-0.373403	96.5333	96.65	97.3375	98.5458	99.6792	4.08296	3.80854	4.10187	3.92429	4.43358	3.82859	0.186445																										938.914	99.897	2.142	53.331	4.092	94.443	3.762	59.636		99.858	4.163
2021-01-20 05:00:00	-0.127043	97.8875	97.65	98.9167	99.5292	100	4.15625	3.90979	4.19733	4.02471	4.52696	3.95319	0																										938.462	99.9	2.003	51.156	3.979	97.978	3.494	60.134		99.9	3.827
2021-01-20 06:00:00	-0.053131	99.7583	99.2458	99.9333	100	100	4.39888	4.158	4.49263	4.33875	4.827	4.22689	0																										938.132	99.9	1.976	65.084		99.9	3.265	73.093		99.9	3.978
2021-01-20 07:00:00	8.02801	100	99.6625	100	100	100	4.58254	4.37237	4.71975	4.56042	5.05754	4.46295	0																										937.789	99.9	2.204	66.169		99.9	3.418	80.365		99.9	4.359
2021-01-20 08:00:00	30.1957	99.6667	98.7958	99.8792	99.9417	100	4.80829	4.62692	5.05558	4.91062	5.44317	4.93498	0																										937.776	99.9	2.834	67.977		99.9	4.967	73.597		99.9	5.554
2021-01-20 09:00:00	58.2454	98.8917	98.0333	99.1333	99.2458	99.8583	5.07108	4.92837	5.40421	5.29858	5.89479	5.448	0																										937.778	99.9	3.306	86.942	5.04	99.787	5.166	82.98		99.9	6.041
2021-01-20 10:00:00	87.0124	94.0875	93.4292	95.1167	94.8792	95.675	6.24817	6.0955	6.65629	6.52062	7.16133	6.61395	0																									6.288	937.516	93.735	3.306	95.756	5.563	94.047	5.63	101.3	5.296	99.368	7.287
2021-01-20 11:00:00	48.7739	92.3333	91.9667	93.7333	93.6375	94.0083	6.47138	6.30904	6.67863	6.54971	7.09517	6.38317	0																									6.618	937.574	90.272	3.428	93.928	6.058	90.387	5.271	95.623	5.8	95.225	5.924
2021-01-20 12:00:00	88.0418	88.9792	88.6167	90.2583	89.8917	90.4125	7.07371	6.93487	7.40908	7.28233	7.78613	7.05568	0																									7.17	937.563	85.438	4.967	122.075	6.528	86.413	7.692	124.223	6.215	90.707	8.608
2021-01-20 13:00:00	102.26	84.8375	84.375	85.8042	85.3875	85.775	7.54462	7.44729	7.99512	7.85633	8.38833	7.6539	0																									7.628	937.024	80.453	5.546	126.695	6.953	81.483	8.347	128.782	6.645	84.595	9.334
2021-01-20 14:00:00	24.9129	85.3	84.8833	86.3125	86.0583	86.3667	7.2465	7.09892	7.50208	7.36417	7.88008	7.09516	0																									7.413	936.225	80.903	5.556	124.716	6.862	81.65	8.427	127.652	6.592	84.63	9.281
2021-01-20 15:00:00	15.3319	89.025	88.575	89.9917	89.6792	90.0292	6.91154	6.73262	7.10558	6.96383	7.49029	6.70119	0																									7.103	935.255	86.115	5.96	123.14	6.552	86.872	9.429	125.048	6.308	91.312	10.488
2021-01-20 16:00:00	1.52551	89.1167	88.6958	90.4125	90.0583	90.475	6.59883	6.41854	6.74754	6.61283	7.13446	6.33721	0																									6.83	934.435	85.988	5.747	123.616	6.325	86.505	8.977	123.828	6.082	90.737	10.338
2021-01-20 17:00:00	-0.237601	89.9625	89.5542	91.2458	90.9375	91.1708	6.43663	6.23229	6.55987	6.41721	6.96283	6.17485	0																									6.663	933.919	87.46	5.761	121.602	6.16	87.817	8.886	124.047	5.922	92.783	9.945
2021-01-20 18:00:00	-0.385617	89.225	88.8208	90.7042	90.3083	90.8	6.27388	6.0445	6.40025	6.24883	6.75917	5.99559	0																									6.477	933.679	86.14	5.312	124.538	5.982	86.39	8.266	123.758	5.73	90.823	9.602
2021-01-20 19:00:00	-0.257415	89.4708	89.0583	90.7333	90.3333	90.7417	6.04208	5.80242	6.19975	6.04771	6.5505	5.81847	0																									6.227	933.713	86.825	6.052	107.499	5.715	87.255	9.267	107.543	5.453	92.138	10.53
2021-01-20 20:00:00	-0.284968	87.6375	87.2875	89.35	88.9083	89.0542	5.87871	5.64804	5.99563	5.8035	6.38221	5.62539	0																									6.105	933.289	83.633	6.035	109.634	5.633	83.825	9.388	108.373	5.41	87.158	10.514
2021-01-20 21:00:00	-0.224304	84.2417	83.975	86.2333	85.7583	86.0333	6.13679	5.90225	6.22754	6.04017	6.58471	5.76958	0																									6.373	932.598	79.002	6.479	123.955	5.912	79.252	10.065	126.799	5.68	81.738	11.752
2021-01-20 22:00:00		87.2125	86.9875	88.9625	88.9	89.0208	6.01021	5.78375	6.10204	5.93583	6.48371	5.70576	0.186445																			10043.7	-8.40716	-15.9365	-112.841	39.5011	14.6511	6.302	931.961	82.997	7.133	115.867	5.902	82.135	11.116	116.051	5.732	84.662	12.812
2021-01-20 23:00:00		95.3	95.2208	97.3042	97.8917	97.9875	5.60192	5.37225	5.59721	5.43908	6.00879	5.27473	1.30512																			10586.5	-8.14284	-15.4418	-109.07	40.724	14.4644	5.938	931.556	97.975	5.83	111.768	5.692	91.305	9.268	112.705	5.568	95.643	10.891
2021-01-21		97.5375	97.25	99.6792	99.825	99.6542	5.73996	5.52367	5.71729	5.5795	6.15983	5.49254	0.932227	11520	-7.9776	-15.1312	-106.899	40.7275	14.1513													11342.4	-7.78893	-14.7789	-104.104	42.1228	14.1278	6.286	931.258	99.477	4.55	118.879	5.777	95.192	7.251	119.445	5.817	99.038	8.518
2021-01-21 01:00:00		99.9083	99.3208	100	100	100	5.64058	5.43637	5.73917	5.60946	6.16962	5.58936	0.372891	11746.4	-7.89945	-14.9912	-106.185	44.4515	13.7443													11861.1	-7.64413	-14.5085	-102.346	43.0692	13.7213		930.751	99.9	4.139	119.855	5.565	99.78	6.851	123.271		99.9	8.049
2021-01-21 02:00:00	-0.001298	100	99.7667	100	100	100	5.48654	5.27867	5.60363	5.45188	5.999	5.45039	0.186445	11928.4	-7.9008	-14.9984	-106.607	46.9591	13.3799													11948.3	-7.87971	-14.9517	-106.426	43.1928	13.1877		930.473	99.9	5.424	123.601	5.527	99.222	8.609	129.7		99.9	9.865
2021-01-21 03:00:00	-0.196975	100	100	100	100	100	5.36542	5.15804	5.51788	5.37763	5.92687	5.38707	0.559336	11919.1	-8.24477	-15.6399	-111.92	44.2251	13.1995													12029.4	-8.11754	-15.3989	-110.529	43.1923	12.6626		930.33	99.9	4.089	117.797		99.9	6.819	119.53		99.9	8.13
2021-01-21 04:00:00	-0.170823	100	100	100	100	100	5.23992	5.02262	5.38896	5.26408	5.79654	5.27814	0.186445	11909.8	-8.58875	-16.2814	-117.233	41.491	13.019													11829	-8.45802	-16.0283	-115.704	37.5232	12.5222		930.294	99.9	3.359	110.637		99.9	5.93	116.527		99.9	7.207
2021-01-21 05:00:00	-0.220833	100	100	100	100	100	5.07296	4.86388	5.21475	5.06479	5.57483	5.08243	0.372891	11720.6	-8.72702	-16.537	-119.646	39.1809	12.6497													11628.5	-8.79851	-16.6576	-120.879	31.854	12.3819	5.8	930.454	99.895	2.752	72.572	5.288	95.782	4.579	78.05	5.19	98.617	5.164
2021-01-21 06:00:00	-0.261188	98.0625	97.8958	100	100	100	5.18346	4.941	5.10633	4.95463	5.39183	4.9114	0	11501	-8.83041	-16.7271	-121.568	36.9426	12.2484													11317.1	-9.03771	-17.1088	-124.395	32.7762	12.4751	5.66	930.522	94.03	3.022	54.433	5.728	85.638	5.35	60.574	5.613	87.01	5.782
2021-01-21 07:00:00	2.70284	93.8458	94.7708	100	99.8583	100	5.63783	5.30167	5.26542	5.11287	5.4575	4.96638	0	11448	-8.88517	-16.8277	-122.44	35.7026	12.1812													10955.5	-9.23111	-17.4793	-127.161	36.68	12.6738	6.123	930.405	87.562	2.917	56.132	6.152	81.697	5.471	65.262	6.002	83.68	5.728
2021-01-21 08:00:00	10.4254	92.9125	94.0833	100	99.0458	100	5.90913	5.55267	5.56904	5.44271	5.75567	5.28198	0	11547.7	-8.8954	-16.8463	-122.35	35.3763	12.4201													10750.8	-9.36649	-17.7381	-129.08	39.1201	12.8245	6.305	930.404	87.333	2.121	63.953	6.257	82.723	3.727	72.799	6.097	86.158	4.172
2021-01-21 09:00:00	16.2028	91.7708	92.8208	100	97.5083	100	6.22083	5.85725	5.90125	5.82179	6.07196	5.62614	0	11717.1	-8.85729	-16.7729	-121.681	34.422	12.502													10830.7	-9.39656	-17.7942	-129.465	38.904	12.8882	6.538	930.637	86.43	2.135	70.425	6.368	82.517	3.827	81.484	6.195	85.608	4.253
2021-01-21 10:00:00	36.2028	91.8667	92.3333	99.975	96.4417	99.9792	6.43467	6.14721	6.23692	6.22925	6.51896	6.0644	0	12186	-8.61127	-16.3037	-118.521	30.7667	11.9092													10918.1	-9.42049	-17.8386	-129.766	38.6293	12.9429	6.625	931.207	88.447	2.127	71.111	6.24	86.237	3.639	76.817	6.055	90.598	4.157
2021-01-21 11:00:00	61.5517	92.1208	92.2208	98.1625	94.9667	97.9083	6.84921	6.63304	6.93371	6.93346	7.36671	6.89924	0	12655	-8.36524	-15.8346	-115.36	27.1114	11.3164													11338.8	-9.17472	-17.3717	-126.372	35.7813	12.6013	6.94	931.464	90.142	2.258	70.808	6.403	88.728	3.587	75.407	6.205	93.818	3.895
2021-01-21 12:00:00	25.6732	93.7958	93.6583	98.6083	95.5708	97.2667	7.02704	6.81412	7.17379	7.13092	7.61296	7.06771	0	12908.8	-8.22782	-15.5851	-113.657	31.8682	11.0238													11759.5	-8.92894	-16.9047	-122.978	32.9334	12.2597	7.165	931.792	95.293	2.446	65.628	6.658	92.393	3.834	65.371	6.454	98.783	4.328
2021-01-21 13:00:00	29.256	96.35	95.9833	99.625	97.8417	98.8208	7.13896	6.93987	7.27671	7.21983	7.67329	7.04447	0	13126.3	-8.10875	-15.3728	-112.2	38.0459	10.782													12198.4	-8.62558	-16.3317	-118.804	31.3643	11.8493		931.651	99.885	2.12	76.047	6.88	96.488	3.38	77.854		99.9	3.95
2021-01-21 14:00:00	16.9046	96.5542	96.0708	99.2083	98.0042	98.3875	7.61371	7.37104	7.70867	7.60629	8.07496	7.34726	0	13218.4	-8.01761	-15.2109	-111.074	43.0968	10.6133													12645.4	-8.29621	-15.7108	-114.279	30.3725	11.4078		930.765	99.9	3.151	109.738	7.328	96.327	5.354	114.621		99.9	6.842
2021-01-21 15:00:00	12.5188	96.85	96.3167	98.85	98.1875	98.5417	7.63462	7.39133	7.77733	7.61421	8.10542	7.35852	0	13195.8	-7.95202	-15.0951	-110.249	47.1172	10.5116													12924.7	-8.06223	-15.2725	-111.198	31.1265	10.9819	7.65	930.048	99.897	4.117	124.028	7.372	96.65	6.562	126.768		99.9	7.843
2021-01-21 16:00:00	1.10231	95.8417	95.4042	97.9	97.4708	97.7083	7.67779	7.44113	7.793	7.58004	8.10083	7.33322	0	13171.2	-7.89508	-14.9931	-109.565	49.8684	10.3803													12899.5	-8.00129	-15.1652	-110.737	35.0475	10.5844	7.942	929.463	99.307	4.692	122.262	7.432	95.118	7.358	122.094	7.3	99.813	8.591
2021-01-21 17:00:00	-0.263858	96.65	96.175	98.4583	98.125	98.3875	7.56646	7.3395	7.69896	7.48417	7.992	7.2401	0	13137.8	-7.87529	-14.9509	-109.485	47.1683	10.1221													12876.6	-7.94131	-15.0595	-110.291	38.8634	10.1852		929.14	99.9	4.637	131.193	7.328	96.673	7.294	130.703		99.9	8.428
2021-01-21 18:00:00	-0.171418	97.8208	97.225	99.2417	98.9542	99.1583	7.45954	7.22925	7.61038	7.38921	7.93342	7.21051	0	13104.3	-7.85551	-14.9086	-109.405	44.4683	9.86386													12954	-7.92363	-15.0247	-110.483	38.0039	9.71478		928.82	99.9	4.606	121.434	7.192	98.787	7.034	123.972		99.9	8.209
2021-01-21 19:00:00	-0.224939	99.0875	98.4042	99.8292	99.7167	99.8167	7.23379	7.03625	7.43696	7.23004	7.77088	7.07504	0	13114.9	-7.8834	-14.9635	-110.264	45.7661	9.44383													13031.3	-7.90596	-14.9898	-110.674	37.1444	9.24436		929.213	99.9	4.397	137.81	7.089	99.802	6.919	135.538		99.9	8.042
2021-01-21 20:00:00	-0.246581	99.6417	98.8542	100	100	100	7.2075	6.98933	7.37304	7.15712	7.68421	6.99915	0	13132.9	-7.91936	-15.0348	-111.282	47.7399	8.99643													13072.7	-7.93961	-15.055	-111.623	38.1456	8.81662		928.956	99.9	3.728	127.966		99.9	6.055	127.579		99.9	7.534
2021-01-21 21:00:00	-0.138092	99.4292	98.7208	100	100	100	7.25225	7.02183	7.37983	7.17292	7.70854	7.00411	0	13169.9	-7.94129	-15.0779	-112.098	48.7072	8.52466													13097.8	-7.99648	-15.1653	-112.915	39.9878	8.40817		928.99	99.9	3.46	123.698		99.9	5.526	125.572		99.9	6.66
2021-01-21 22:00:00		99.9875	99.6458	100	100	100	7.14475	6.92508	7.30504	7.11742	7.6495	6.95097	0	13224.4	-7.95039	-15.0951	-112.73	48.7533	8.03058													13150.9	-8.01431	-15.201	-113.659	41.11	7.94865		928.509	99.9	2.792	132.15		99.9	4.304	134.569		99.9	5.198
2021-01-21 23:00:00		100	100	100	100	100	7.0735	6.86125	7.24592	7.06654	7.56367	6.88141	0	13267.4	-7.95873	-15.1096	-113.314	48.145	7.56249													13254.7	-7.96134	-15.101	-113.412	40.9261	7.39649		928.241	99.9	2.102	105.793		99.9	3.347	111.78		99.9	4.12
2021-01-22		100	100	100	100	100	6.99683	6.76754	7.16425	6.98017	7.46917	6.79659	0	13261.4	-7.96378	-15.1127	-113.696	44.7274	7.20603													13353	-7.91104	-15.006	-113.193	40.656	6.85456		927.843	99.9	1.96	89.259		99.9	3.099	91.936		99.9	3.71
2021-01-22 01:00:00		100	100	100	100	100	7.01183	6.77179	7.15296	6.95992	7.41379	6.74637	0	13255.4	-7.96883	-15.1158	-114.077	41.3097	6.84957													13205.7	-7.9796	-15.1272	-114.25	36.5532	6.76786		927.647	99.9	1.728	75.771		99.9	3.112	78.815		99.9	3.536
2021-01-22 02:00:00		99.8167	99.3042	100	100	100	7.10242	6.88413	7.239	7.03142	7.45175	6.80123	0	13107.7	-8.03474	-15.2347	-115.06	38.6153	6.81773													13058.4	-8.04816	-15.2485	-115.307	32.4504	6.68117		927.262	99.9	2.13	71.277	6.963	99.42	3.762	77.679		99.9	4.255
2021-01-22 03:00:00		99.3458	98.6292	100	100	100	6.89942	6.67587	7.05063	6.84129	7.28637	6.64739	0	12936.1	-8.11093	-15.3732	-116.145	36.0431	6.84074													12863.9	-8.11094	-15.3706	-116.422	34.6188	6.54203		926.487	99.9	3.204	68.551	6.813	98.448	5.463	63.025		99.9	6.471
2021-01-22 04:00:00		98.5875	97.9333	100	99.7583	100	6.80025	6.55492	6.88475	6.68	7.10208	6.4406	0	12757.5	-8.17862	-15.5012	-117.156	36.4641	6.85418													12648.2	-8.17111	-15.493	-117.565	39.619	6.3792		925.972	99.9	2.831	80.059	6.707	97.407	5.335	78.992		99.9	6.102
2021-01-22 05:00:00		97.0167	96.5292	99.1833	98.6417	99.7375	6.93658	6.67554	6.99171	6.78354	7.19858	6.51793	0	12572.5	-8.23852	-15.6197	-118.099	39.623	6.85885													12373.3	-8.282	-15.7034	-119.289	40.6917	6.33876	7.148	925.346	98.53	2.859	73.912	6.822	94.57	5.022	76.765	6.807	99.513	5.352
2021-01-22 06:00:00		94.5875	94.2667	97.1125	96.6292	97.8958	6.72046	6.47458	6.78196	6.56492	7.01612	6.33191	0	12387.6	-8.31186	-15.7617	-119.201	41.8387	6.89291													11991.3	-8.48479	-16.0733	-122.066	34.6475	6.52008	6.922	924.503	92.86	3.225	85.003	6.653	89.563	5.56	82.376	6.587	93.49	6.234
2021-01-22 07:00:00		93.825	93.5292	96.2083	95.7708	97.0792	6.53746	6.30617	6.6145	6.41579	6.86067	6.19562	0	12203.5	-8.4429	-16.0046	-120.983	40.003	7.0532													11625.9	-8.67955	-16.4286	-124.729	28.8543	6.69919	6.76	923.488	91.888	3.606	85.498	6.547	89.277	6.329	86.668	6.593	93.25	7.482
2021-01-22 08:00:00		93.5083	93.2333	95.9833	95.5583	96.7333	6.95246	6.71079	6.983	6.80017	7.23629	6.52883	0	12019.5	-8.57394	-16.2475	-122.766	38.1673	7.21349													11997.3	-8.51672	-16.1325	-122.28	34.2285	6.77983	7.155	922.851	91.863	3.53	90.524	6.863	90.7	6.147	95.867	6.793	97.31	7.477
2021-01-22 09:00:00		94.6542	94.2958	96.6583	96.3167	97.2333	7.69067	7.452	7.76879	7.58692	8.03792	7.28676	0	12766.3	-8.18344	-15.5177	-117.146	40.5701	6.99531													12368.7	-8.35389	-15.8365	-119.832	39.6026	6.86048	7.779	921.862	95.792	3.134	81.353	7.44	93.988	5.384	88.459	7.042	99.798	6.346
2021-01-22 10:00:00		97.5333	96.8917	98.4542	98.1917	98.6292	8.47458	8.30833	8.71	8.5475	9.01417	8.29249	0	13670.1	-7.70503	-14.624	-110.279	43.6875	6.71332													13176.1	-8.03671	-15.2463	-115.042	42.9269	6.9285		921.203	99.9	3.729	93.423	8.067	98.65	5.767	102.729		99.9	6.823
2021-01-22 11:00:00		100	99.8875	100	100	100	8.35083	8.18792	8.61667	8.49583	8.95625	8.30851	2.79668	14303.7	-7.69021	-14.6014	-109.928	46.5272	6.88394													14180.3	-7.64989	-14.5234	-109.196	45.3262	6.99082		920.393	99.9	5.229	133.952		99.9	8.036	136.403		99.9	9.183
2021-01-22 12:00:00		100	100	100	100	100	8.21417	8.01433	8.43167	8.30167	8.77083	8.15224	3.91535	14690.4	-8.09922	-15.3753	-115.534	49.1128	7.46835													14767	-7.6229	-14.476	-108.434	47.1811	7.37438		919.754	99.9	4.574	136.059		99.9	7.057	135.495		99.9	8.234
2021-01-22 13:00:00		100	100	100	100	100	7.752	7.58658	8.1165	7.97979	8.4875	7.96726	1.11867	14991.3	-8.4695	-16.0756	-120.564	51.3153	8.04016													14597.7	-8.2477	-15.6522	-116.878	48.0498	8.33983		918.047	99.9	3.815	140.313		99.9	6.306	140.939		99.9	7.18
2021-01-22 14:00:00		100	100	100	100	100	7.52154	7.38729	7.86646	7.75996	8.27417	7.81594	4.28824	14924.4	-8.67374	-16.4604	-123.125	51.8751	8.55793													14413	-8.86851	-16.821	-125.29	48.9124	9.27809		915.692	99.9	1.866	100.575	7.5	99.888	3.064	119.348	7.5	99.612	3.498
2021-01-22 15:00:00		100	100	100	100	100	7.33896	7.24062	7.78083	7.61946	8.13079	7.59285	3.35602	14857.4	-8.87797	-16.8453	-125.687	52.4349	9.0757													13559.8	-9.31671	-17.6636	-132.273	49.5102	9.03641		914.095	99.9	1.08	325.26	7.6	99.898	1.49	324.481	7.633	99.247	1.429
2021-01-22 16:00:00		100	100	100	100	100	5.31579	5.22387	5.67133	5.53479	6.01633	5.67021	0.932227	13755.8	-9.63439	-18.2639	-136.614	51.9082	9.49725													12706.6	-9.76491	-18.5063	-139.256	50.1079	8.79473		912.779	99.9	3.651	240.221		99.9	5.309	285.137		99.9	5.822
2021-01-22 17:00:00		99.0792	98.7625	100	99.8958	99.8292	4.77733	4.60521	4.87863	4.72121	5.27617	4.80076	0.186445	12480.1	-10.4837	-19.8565	-148.95	51.1986	9.9026													11851.7	-11.2588	-21.3024	-160.413	48.5701	10.006	5.471	911.822	95.502	7.297	264.045	5.136	93.545	11.535	261.973	5.03	94.043	13.142
2021-01-22 18:00:00		95.8208	95.5542	100	98.875	98.9167	4.68738	4.50842	4.54154	4.46833	5.03979	4.2729	0	11562	-11.5497	-21.8488	-164.391	48.0331	10.3992													10995.9	-13.2241	-24.979	-187.96	46.0696	11.8722	5.082	911.718	91.66	6.567	281.517	4.817	88.305	11.866	282.198	4.697	89.715	13.994
2021-01-22 19:00:00		91.1125	91.0708	96.8333	94.5917	94.7208	4.79783	4.601	4.63921	4.55887	5.10813	4.06083	0.186445	10970.3	-12.8135	-24.2059	-182.668	42.6257	10.9791													9928.37	-14.5474	-27.4532	-206.707	43.7875	12.9188	5.138	912.124	85.038	6.489	284.014	4.842	82.725	11.581	283.806	4.648	84.253	13.901
2021-01-22 20:00:00		82.925	83.1621	87.1875	86.6083	86.7333	3.11508	2.90829	3.05825	2.86992	3.44183	2.37766	0	10157.4	-13.7906	-26.0285	-196.791	38.5281	11.4375													8478.19	-14.7102	-27.754	-209.548	41.9	12.4842	3.407	912.645	74.998	7.649	290.764	3.095	72.908	14.085	295.006	2.888	73.288	16.613
2021-01-22 21:00:00		72.7479	73.0942	77.5017	77.6312	77.2246	2.46663	2.26017	2.30642	2.08021	2.70104	1.52346	0	8399.21	-13.5432	-25.5685	-193.171	40.0238	11.377													7047.07	-14.8476	-28.0074	-211.999	40.0889	12.0606	2.805	913.584	63.512	8.138	304.907	2.508	61.565	14.69	303.447	2.288	61.733	17.549
2021-01-22 22:00:00		66.5775	66.9392	71.2392	71.6808	71.2792	2.28475	2.08646	2.09996	1.85508	2.49375	1.17751	0	6641.06	-13.2958	-25.1084	-189.55	41.5195	11.3165													6413.71	-13.9216	-26.278	-198.126	41.4754	12.0982	2.612	914.266	57.785	8.264	296.741	2.375	55.682	14.643	298.546	2.182	55.423	16.828
2021-01-22 23:00:00		65.9546	66.1912	70.0692	70.3975	70.6333	2.09767	1.90237	1.94233	1.70167	2.28379	0.892345	0	6281.6	-12.527	-23.6611	-177.282	37.4882	12.0066													5780.36	-12.9956	-24.5487	-184.254	42.8618	12.1357	2.425	915.069	57.263	7.71	302.792	2.198	55.192	14.258	297.633	2.032	54.812	17.478
2021-01-23		66.7808	66.9954	70.7275	70.8696	71.0921	2.32321	2.10108	2.10317	1.87871	2.46325	0.939526	0	6155.75	-11.6712	-22.0489	-163.569	32.5339	12.8221													5714.99	-12.2382	-23.1268	-172.313	40.8835	12.7016	2.645	916.728	58.435	8.231	306.463	2.468	56.632	15.24	304.585	2.303	56.523	18.408
2021-01-23 01:00:00		68.9733	69.1383	72.8054	72.8988	72.9004	2.48317	2.255	2.28313	2.04596	2.65475	1.17278	0	6138.57	-11.1901	-21.143	-155.739	29.9819	13.4055													5904.35	-11.5564	-21.8429	-161.239	37.3961	13.5045	2.818	918.067	60.635	6.994	304.638	2.627	59.127	13.422	304.782	2.432	59.197	16.024
2021-01-23 02:00:00		70.0508	70.2954	74.2283	74.2596	73.9821	2.0865	1.85404	1.78458	1.56346	2.20771	0.824136	0	6220.08	-11.0495	-20.8787	-153.252	29.6121	13.7782													6043.68	-11.0748	-20.9382	-153.427	36.1362	14.0781	2.495	918.633	61.527	6.431	300.536	2.288	60.342	11.842	301.945	2.107	60.615	13.908
2021-01-23 03:00:00		72.8896	73.1262	76.8671	76.9154	76.3563	1.6975	1.47258	1.432	1.20504	1.89017	0.610574	0	6296.69	-10.894	-20.5874	-150.556	29.8173	14.1434													6092.97	-10.9535	-20.7158	-151.487	38.884	14.2393	2.095	919.63	64.628	4.768	295.319	1.908	63.363	8.666	295.581	1.763	63.443	10.578
2021-01-23 04:00:00		72.5704	72.7479	76.2846	76.0646	76.3254	1.85554	1.64329	1.63392	1.41688	2.00663	0.599951	0	6352.46	-10.6748	-20.1812	-146.973	32.467	14.4769													6142.71	-10.8281	-20.4856	-149.474	41.5021	14.4102	2.188	920.544	64.635	5.359	289.499	2.015	63.238	9.763	289.871	1.878	63.418	11.992
2021-01-23 05:00:00		73.0279	73.1921	76.635	76.4363	76.4417	1.87283	1.66479	1.66958	1.44846	2.07567	0.687954	0	6408.22	-10.4556	-19.775	-143.39	35.1167	14.8103													6211.18	-10.5357	-19.9318	-144.47	38.7674	14.9841	2.227	921.044	65.073	5.486	299.235	2.073	63.547	10.827	299.442	1.955	63.625	13.633
2021-01-23 06:00:00		76.3971	76.7117	80.5267	80.4417	80.2262	1.28525	1.04775	0.911292	0.672375	1.33871	0.051984	0	6477.3	-10.3145	-19.5089	-140.942	34.3588	15.129													6279.66	-10.2432	-19.3781	-139.467	36.0328	15.5581	1.752	921.455	68.283	5.658	293.124	1.683	66.63	10.662	291.541	1.583	66.943	12.893
2021-01-23 07:00:00		74.8383	75.375	80.0521	80.0375	79.7075	1.92683	1.66837	1.34996	1.07167	1.73383	0.445196	0	6548.59	-10.1865	-19.2662	-138.684	33.0325	15.4452													6327.6	-10.2084	-19.3187	-138.599	39.1591	15.9505	2.07	921.445	67.942	3.29	285.428	1.94	66.157	6.31	285.719	1.858	66.037	8.183
2021-01-23 08:00:00		68.1329	67.6433	72.9508	72.9762	73.4521	3.54962	3.58263	3.19504	2.83192	3.36254	1.7403	0	6713.73	-10.146	-19.1939	-137.613	35.0762	15.9386													6366.35	-10.2892	-19.481	-139.586	44.9122	16.2617	3.333	921.657	62.31	4.731	284.333	2.728	62.295	8.366	279.993	2.512	62.517	9.534
2021-01-23 09:00:00		63.7071	62.8571	66.6813	67.0192	66.5733	4.90304	5.06067	5.03488	4.78129	5.47567	4.29461	0	6964.29	-10.1851	-19.2769	-137.622	40.1877	16.5933													6547.17	-10.3486	-19.5984	-140.458	48.1005	16.3296	4.75	922.002	57.712	3.943	293.969	3.787	58.823	7.489	293.859	3.397	59.888	9.535
2021-01-23 10:00:00		71.4137	70.5146	71.5225	72.1833	71.8117	4.47829	4.66917	5.35125	5.10304	5.60371	5.5163	0	7239.28	-10.2016	-19.3163	-137.45	44.8102	17.0807													6984.18	-10.3695	-19.635	-141.121	46.6642	15.9591	4.302	922.331	66.06	3.962	281.212	3.397	67.263	7.022	288.257	3.077	68.14	8.375
2021-01-23 11:00:00		74.2562	73.2433	74.1733	74.1475	75.11	4.35425	4.54875	5.22637	5.10996	5.44475	5.32291	0	7618.04	-10.1215	-19.1708	-136.509	47.3547	16.857													7417.94	-10.3865	-19.6642	-141.709	45.2612	15.6052	4.263	922.598	69.157	2.316	267.809	3.463	70.358	3.468	272.403	3.148	71.702	3.973
2021-01-23 12:00:00		77.0096	76.3629	77.1846	77.585	77.8213	3.77508	3.94188	4.51375	4.41867	4.78975	4.67098	0	7996.81	-10.0414	-19.0252	-135.569	49.8991	16.6333													7717.67	-10.2423	-19.3935	-139.209	45.2329	15.9395	3.923	923.477	70.917	1.624	215.219	3.188	71.585	1.848	218.829	2.877	73.212	2.076
2021-01-23 13:00:00		91.8625	91.9208	91.8167	93.25	93.6708	1.62279	1.68142	2.04921	1.9455	2.46371	2.59971	0.932227	8481.04	-10.2349	-19.3961	-138.584	54.0883	16.5843													8017.41	-10.098	-19.1228	-136.709	45.2046	16.2737	2.303	923.556	91.582	2.173	246.169	1.348	88.795	3.548	246.447	1.145	92.205	4.348
2021-01-23 14:00:00		99.2667	98.9917	98.4125	99.7667	99.9333	1.39525	1.41437	1.70592	1.65329	2.18879	2.40718	1.49156	8982.87	-10.4741	-19.8531	-142.26	58.5518	16.5646													8541.35	-10.1402	-19.2066	-137.084	47.7367	16.5683		923.105	99.9	2.518	263.577	1.422	97.352	4.286	265.86	1.306	99.75	4.946
2021-01-23 15:00:00		99.9458	99.85	99.9417	100	100	2.076	2.05279	2.30262	2.23629	2.77612	2.79406	0.932227	9455.12	-10.441	-19.7909	-142.013	58.4761	16.3141													9165.91	-10.266	-19.4495	-138.751	51.4182	16.845		922.471	99.9	1.461	283.345	1.894	99.15	3.072	272.044		99.9	4.153
2021-01-23 16:00:00		100	100	100	100	100	3.04471	2.895	3.06188	2.95487	3.53613	3.19059	0	9900.48	-10.1605	-19.2566	-138.199	54.2722	15.8538													9632.48	-10.3756	-19.657	-140.48	52.3958	16.7763		921.785	99.9	1.525	257.263	3.442	99.148	3.308	249.549		99.9	4.698
2021-01-23 17:00:00		99.2667	99.3625	100	100	100	3.56808	3.38146	3.50712	3.36067	3.97421	3.49895	1.11867	10179.2	-10.0465	-19.0361	-136.89	50.7193	15.3989													9814.4	-10.456	-19.8006	-142.319	48.502	16.0854	3.962	921.394	99.888	3.052	256.671	3.633	95.835	5.804	261.005	3.45	99.643	7.492
2021-01-23 18:00:00		98.5917	98.7958	100	100	100	2.53496	2.39675	2.62337	2.44021	3.126	2.84769	0.186445	9749.04	-10.6416	-20.1511	-146.242	49.9368	14.9665													9983.07	-10.5446	-19.9597	-144.27	44.7482	15.4075	3.762	920.931	99.285	3.323	251.018	2.998	96.057	6.482	259.937	3.385	95.738	7.961
2021-01-23 19:00:00		100	100	100	100	100	1.46321	1.29496	1.39908	1.25263	1.88171	1.8883	0	9318.83	-11.2368	-21.266	-155.594	49.1544	14.5342													9597.6	-10.9753	-20.7712	-150.893	46.8497	15.276	2.3	920.791	99.9	1.507	74.101	2.453	95.755	2.698	253.115	2.997	94.797	5.605
2021-01-23 20:00:00		97.8208	99.0833	100	100	100	2.5455	2.11508	1.96771	1.67246	2.32358	1.99633	0	9258.97	-11.3731	-21.5156	-157.556	45.9237	14.5687													9212.13	-11.4059	-21.5826	-157.517	48.9511	15.1445	3.213	920.875	90.222	1.555	282.95	3.205	85.58	3.181	204.803	3.085	87.213	3.414
2021-01-23 21:00:00		94.2042	95.8708	100	100	100	2.60542	2.29612	2.10308	1.83292	2.47162	2.22771	0	9260.93	-11.4328	-21.6207	-158.285	42.2843	14.6813													9025.7	-11.6162	-21.9759	-160.938	48.4725	14.8688	3.173	920.891	87.345	1.425	281.916	3.465	78.228	2.774	273.467	3.417	77.07	3.768
2021-01-23 22:00:00		93.5875	95.3	100	100	100	2.53154	2.22429	2.07238	1.81125	2.42175	2.1918	0	9264.15	-11.4409	-21.6345	-158.616	41.5347	14.4601													8928.56	-11.7275	-22.1815	-162.924	46.8367	14.5283	3.01	920.908	88.827	2.199	280.575	3.258	79.507	4.365	275.086	3.665	72.23	4.934
2021-01-23 23:00:00		98.6	98.7333	100	100	100	1.84367	1.69058	1.78471	1.60796	2.18704	2.09501	0	9268.51	-11.4021	-21.5652	-158.586	43.4096	13.9358													8859.15	-11.8052	-22.3252	-164.294	45.7778	14.3071	2.345	920.994	99.328	1.34	29.528	2.287	91.387	2.437	10.845	2.597	87.03	2.767
2021-01-24		97	98.2167	100	100	100	1.97446	1.67667	1.65312	1.44333	2.00796	2.0924	0	9252.47	-11.5188	-21.7874	-160.856	45.3854	13.4424													8839.68	-11.8223	-22.3572	-164.556	45.7579	14.301	2.59	920.566	92.265	1.654	19.534	2.697	84.69	2.628	25.843	2.787	82.68	2.77
2021-01-24 01:00:00		96.0083	96.9208	100	100	100	1.82583	1.62413	1.64767	1.43562	2.00125	1.98878	0.186445	9149.78	-12.2959	-23.2472	-172.897	47.7899	13.0803													8816.41	-11.8616	-22.4305	-165.168	45.6505	14.2763	2.315	919.979	92.773	1.25	10.971	2.272	84.328	1.863	48.92	2.21	84.262	2.1
2021-01-24 02:00:00		97.3083	97.3833	100	100	100	1.15692	1.05288	1.126	1.00654	1.55933	1.47601	0.186445	9047.08	-13.073	-24.7071	-184.939	50.1944	12.7181													8636.83	-12.8135	-24.2055	-180.156	41.9447	13.4875	1.582	918.966	97.06	2.152	315.742	1.597	86.897	3.403	314.124	1.67	85.608	3.678
2021-01-24 03:00:00		98.7042	98.4	100	100	100	0.9685	0.860625	0.949333	0.825208	1.37721	1.47158	0	8878.32	-13.3859	-25.2865	-189.899	46.7774	12.3935													8457.24	-13.7654	-25.9804	-195.145	38.2389	12.6987	1.44	918.581	99.213	2.738	318.525	1.383	88.92	5.578	322.464	1.372	89.32	6.099
2021-01-24 04:00:00		98.05	98	100	99.9917	100	0.962917	0.792625	0.8	0.670125	1.26475	1.11869	0	8698.55	-13.6215	-25.7192	-193.679	42.3903	12.0752													8344.04	-13.9478	-26.3204	-198.099	37.3188	12.4641	1.438	918.29	97.727	2.576	296.819	1.492	87.268	4.765	300.368	1.667	83.648	5.583
2021-01-24 05:00:00		95.575	95.9167	100	99.3042	99.6958	1.14042	0.978708	0.91925	0.830667	1.39533	1.05976	0	8406.87	-13.6645	-25.7986	-194.029	41.6474	12.3592													8260.58	-13.7856	-26.0176	-195.663	37.6465	12.4777	1.503	917.573	93.692	3.909	290.094	1.582	85.288	6.59	295.999	1.878	80.482	7.815
2021-01-24 06:00:00		91.3792	92.1583	99.325	96.6	97.175	1.04696	0.797458	0.502667	0.452917	1.00171	0.197506	0	8013.47	-13.5327	-25.5566	-191.262	44.217	13.1906													8029.95	-13.563	-25.6012	-191.981	37.6122	12.8289	1.555	917.039	85.332	4.297	290.094	2.173	73.013	7.745	296.884	2.455	67.628	8.951
2021-01-24 07:00:00		84.3792	85.5917	94.3958	91.5958	92.8417	1.46783	1.21008	0.677125	0.575167	1.04913	0.001107	0	7670.26	-13.3398	-25.1989	-187.531	45.9306	14.0603													7534.53	-13.232	-24.9805	-186.056	36.9266	13.7877	1.827	916.415	76.59	4.122	305.665	1.867	72.04	7.857	308.688	1.835	70.98	9.121
2021-01-24 08:00:00		75.6192	75.7092	83.8133	82.555	83.9954	2.98104	3.0165	2.42537	2.20562	2.64742	1.03241	0	7539.89	-12.8883	-24.3502	-179.71	44.0148	15.0922													7041.61	-12.9028	-24.3633	-180.16	36.2953	14.7465	2.855	916.198	68.988	3.278	309.568	2.367	66.742	6.692	308.738	2.198	65.795	8.794
2021-01-24 09:00:00		70.4608	69.7754	75.4217	75.7992	76.3679	3.8045	3.94142	3.82704	3.51042	4.07821	2.66388	0	7409.53	-12.4368	-23.5015	-171.888	42.099	16.124													6649.1	-12.646	-23.8852	-175.375	37.8405	15.7068	3.632	916.749	63.987	4.484	316.312	2.768	63.042	8.403	313.97	2.505	61.75	10.039
2021-01-24 10:00:00		60.3329	59.9208	64.3004	65.5204	64.7942	4.78879	4.82358	4.928	4.63396	5.44896	4.81986	0.186445	6705.28	-12.0865	-22.8438	-165.339	41.2917	17.4116													6256.59	-12.3891	-23.4072	-170.59	39.3858	16.6671	4.6	917.534	53.487	5.128	305.219	3.53	52.23	9.295	303.784	3.173	50.773	11.254
2021-01-24 11:00:00		44.1117	44.0412	48.4075	49.2671	48.6054	6.11821	6.04417	6.17308	6.03287	6.94254	7.11206	0	5905.62	-11.753	-22.2178	-159.001	40.6687	18.7417													5337.37	-12.2629	-23.1781	-167.78	43.3452	17.6445	5.817	918.791	38.083	5.875	301.359	4.698	36.662	10.504	301.755	4.25	35.413	11.751
2021-01-24 12:00:00		32.7546	32.4937	36.49	37.1979	37.0267	6.866	6.85888	6.93863	6.80342	8.01775	7.3214	0	5310.94	-11.5489	-21.8313	-154.949	38.4616	19.7016													4182.25	-12.1951	-23.0605	-165.854	48.3857	18.6295	6.558	920.08	27.83	5.421	316.884	5.457	26.465	9.242	314.062	5.023	25.132	10.475
2021-01-24 13:00:00		35.8263	35.2587	37.7704	39.0804	37.5967	6.92958	6.949	7.46308	7.05192	8.55958	7.84592	0	4902	-11.462	-21.6617	-152.967	34.8189	20.3263													3605.97	-12.0883	-22.8616	-163.513	49.0219	19.38	6.695	921.123	30.868	5.125	323.868	5.56	30.557	8.323	319.015	5.165	29.523	9.452
2021-01-24 14:00:00		37.4317	37.0662	40.5821	41.2737	38.4025	6.90242	6.77346	6.69629	6.526	8.22408	7.01033	0	4579.61	-11.3925	-21.5279	-151.447	32.9527	20.7767													4066.14	-11.9117	-22.5173	-160.427	41.7719	19.7108	6.355	921.605	33.28	4.466	302.35	5.363	33.103	6.995	303.927	4.982	31.745	7.764
2021-01-24 15:00:00		42.9308	43.5183	46.5521	47.5421	44.4892	5.69062	5.16733	5.36633	5.00413	6.40679	5.38817	0	4623.18	-11.3963	-21.5456	-151.874	38.5976	20.4903													4507.18	-11.7412	-22.1849	-157.446	34.8089	20.0328	5.442	922.34	37.987	4.127	287.242	4.725	37.458	6.408	282.931	4.44	35.977	7.181
2021-01-24 16:00:00		48.8608	48.9379	52.5729	53.515	52.3462	3.09058	2.85117	2.67338	2.38383	3.11063	1.86114	0	4666.74	-11.4002	-21.5633	-152.302	44.2426	20.204													4205.16	-11.8079	-22.3176	-158.524	38.9981	20.0166	3.453	923.153	42.663	3.664	277.302	3.182	41.337	5.633	278.868	3.035	39.678	6.436
2021-01-24 17:00:00		45.8883	45.9317	49.9742	50.4754	50.3404	2.02317	1.83221	1.71479	1.4745	2.04513	0.675246	0	4477.26	-11.4904	-21.7288	-153.806	42.2984	20.0241													3903.15	-11.8745	-22.4503	-159.602	43.1874	20.0005	2.477	923.526	39.39	2.827	279.675	2.32	37.285	5.129	277.656	2.223	35.405	6.656
2021-01-24 18:00:00		48.0821	48.1587	51.8304	52.3696	52.4542	1.40463	1.23596	1.07575	0.819417	1.40375	-0.042843	0	4249.24	-11.5949	-21.9188	-155.488	39.099	19.8617													3804.48	-11.872	-22.4456	-159.774	43.2317	19.791	1.948	924.179	41.32	3.725	308.349	2.04	38.25	6.724	309.077	2.198	34.883	8.614
2021-01-24 19:00:00		50.8275	51.2546	55.7529	56.7329	56.4042	0.650375	0.372958	0.026708	-0.243333	0.387167	-1.06813	0	4311.44	-11.566	-21.8644	-155.32	39.0166	19.5951													3796.57	-11.8386	-22.3797	-159.542	41.4258	19.4952	1.34	924.752	43.253	2.958	306.495	1.743	39.092	5.968	303.312	1.837	36.203	7.86
2021-01-24 20:00:00		48.5425	49.8958	56.3267	60.6425	66.0975	0.797875	0.171708	-0.661542	-1.35571	-1.19525	-1.90027	0	4636.16	-11.4164	-21.589	-153.478	41.7537	19.2343													3946.76	-11.8201	-22.3444	-159.595	41.0775	19.1605	1.655	925.268	40.85	2.459	298.104	1.725	41.827	4.855	291.368	1.907	47.672	5.454
2021-01-24 21:00:00		50.7313	52.1596	58.6512	64.125	70.1133	1.12371	0.412292	-0.31075	-0.929917	-0.773167	-0.952554	0	5108.83	-11.2923	-21.3594	-152.253	43.4162	18.6218													4379.37	-11.8282	-22.3638	-160.154	43.333	18.7562	1.89	925.353	43.833	1.349	359.271	1.715	50.915	1.927	283.37	1.563	55.863	2.71
2021-01-24 22:00:00		69.0079	69.0596	71.5958	74.2725	74.705	1.22192	0.977	0.79275	0.427708	0.953	0.541514	0	6204.46	-11.2754	-21.3224	-153.63	40.5545	16.9496													4842.08	-11.8253	-22.3624	-160.566	45.5719	18.3332	1.72	925.565	63.292	0.678	357.484	1.783	69.917	0.914	161.729	1.635	74.947	1.239
2021-01-24 23:00:00		92.0458	92.0583	92.25	93.8708	94.1917	0.901583	0.782125	0.921292	0.685083	1.32862	1.12889	0.186445	7300.09	-11.2585	-21.2854	-155.006	37.6928	15.2773													6480.36	-11.3892	-21.5478	-155.201	47.1584	17.1821	1.254	925.576	93.217	2.319	263.964	1.485	89.315	4.193	250.494	1.543	95.16	5.196
2021-01-25		98.6375	98.4875	98.9792	99.7	99.8625	1.19421	1.04612	1.16342	0.961083	1.64767	1.53975	0.745782	8214.17	-10.9292	-20.679	-150.815	43.7127	14.6171													8118.65	-10.9531	-20.7332	-149.835	48.7449	16.0309		925.154	99.9	2.738	269.334	1.585	97.558	5.621	261.524		99.9	7.016
2021-01-25 01:00:00		100	99.9708	100	100	100	2.03812	1.89525	2.062	1.87158	2.546	2.22077	0.372891	9098.27	-10.5483	-19.9785	-145.704	51.199	14.1239													9001.56	-10.5922	-20.0555	-145.717	48.2911	14.7275		924.89	99.9	2.265	252.122		99.9	4.877	245.429		99.9	6.411
2021-01-25 02:00:00		100	100	100	100	100	2.68242	2.54346	2.75758	2.56829	3.20654	2.80508	0.186445	9596.15	-10.3032	-19.5211	-142.739	52.4047	13.4291													9547.17	-10.2649	-19.439	-142.156	46.9262	13.356		924.263	99.9	3.626	243.538		99.9	7.039	247.375		99.9	8.838
2021-01-25 03:00:00		100	100	100	100	100	2.79529	2.67408	2.901	2.7005	3.31254	2.92709	0	9744.02	-10.1812	-19.2838	-141.719	47.9185	12.5514													9738.28	-10.1931	-19.3037	-141.889	46.6474	12.5406		923.636	99.9	4.936	259.037	2.72	99.698	8.334	258.734		99.9	9.728
2021-01-25 04:00:00		98.875	98.6375	100	100	100	2.38837	2.24662	2.39854	2.20967	2.80821	2.43464	0.186445	9722.85	-10.1366	-19.1931	-141.508	44.0844	12.0365													9293.06	-10.5797	-20.0322	-147.534	48.3181	12.7232	2.737	923.234	98.902	5.288	258.15	2.385	95.158	8.844	262.971	1.935	98.265	10.544
2021-01-25 05:00:00		93.0458	93.6333	100	97.6792	98.4125	1.94942	1.73596	1.64433	1.50362	2.05979	1.53952	0	8986.24	-10.42	-19.7228	-144.725	43.01	13.057													8841.12	-10.9542	-20.7373	-152.965	49.7728	12.9332	2.347	922.984	87.58	3.615	299.219	2.248	82.83	6.932	298.241	2.255	80.387	8.849
2021-01-25 06:00:00		85.3792	86.4167	96.2917	91.6167	92.3042	1.947	1.70929	1.43454	1.35187	1.912	1.13482	0	8249.63	-10.7034	-20.2525	-147.942	41.9356	14.0776													8123.34	-10.8414	-20.5126	-149.872	42.6647	14.2288	2.33	922.883	77.933	3.079	302.579	2.285	72.988	6.654	295.877	2.227	71.112	9.168
2021-01-25 07:00:00		82.375	83.175	89.4	87.5792	88.3958	1.79888	1.64283	1.44925	1.31246	1.88633	0.908952	0	7916.43	-10.607	-20.0737	-145.54	43.0181	15.0494													7405.56	-10.7286	-20.2879	-146.779	35.5566	15.5243	2.128	923.447	75.237	3.18	295.836	1.928	71.793	6.798	294.551	1.872	69.997	8.838
2021-01-25 08:00:00		78.4267	78.4813	83.7983	83.2917	83.9292	2.60179	2.59204	2.47129	2.21113	2.82196	1.91032	0	7649.96	-10.4478	-19.7777	-142.208	44.4576	16.0131													6908.8	-10.6347	-20.1088	-144.465	33.9208	16.4052	2.555	923.413	72.555	3.589	312.136	1.933	71.383	7.305	306.126	1.697	70.992	9.515
2021-01-25 09:00:00		68.7333	68.1758	72.6242	72.9779	73.5792	3.45017	3.5565	3.68808	3.39363	4.08667	3.29511	0	7202.4	-10.3448	-19.5834	-139.599	43.8849	17.0676													6510.6	-10.5492	-19.9499	-142.498	34.7253	17.1011	3.305	923.698	62.427	4.331	303.915	2.357	62.258	8.034	302.591	1.972	62.415	9.856
2021-01-25 10:00:00		56.4917	55.8113	59.1308	60.28	60.1337	4.44796	4.601	5.00338	4.67733	5.50683	5.58622	0	6590.99	-10.2926	-19.481	-137.644	41.4918	18.2041													6059.71	-10.5243	-19.9029	-141.652	34.6442	17.5713	4.118	924.09	50.408	4.782	307.665	2.933	50.692	8.338	305.049	2.438	50.682	9.73
2021-01-25 11:00:00		51.8796	51.2242	53.6133	54.5746	54.5967	4.67471	4.79121	5.41538	5.19471	6.12125	6.93853	0	6039.47	-10.2554	-19.4072	-136.225	39.397	19.0328													5514.41	-10.6077	-20.0564	-142.814	32.9763	17.6371	4.342	924.47	46.258	4.584	317.111	3.055	46.773	7.689	312.061	2.575	46.86	9.256
2021-01-25 12:00:00		50.9754	50.275	52.3192	52.9483	51.8292	4.28742	4.42117	4.92537	4.73438	5.87758	6.165	0	5739.91	-10.2809	-19.4536	-137.062	38.5572	18.5662													4977.83	-10.6897	-20.2072	-143.953	31.3521	17.7046	4.148	924.737	45.238	4.393	303.73	2.905	45.93	7.184	303.975	2.343	46.123	8.361
2021-01-25 13:00:00		52.08	51.4617	52.9471	53.8438	52.2946	3.80367	3.89988	4.49825	4.1305	5.38158	5.45418	0	5440.36	-10.3064	-19.4999	-137.9	37.7173	18.0996													4773	-10.7157	-20.256	-144.213	31.3894	17.835	3.733	925.198	46.188	4.603	313.617	2.647	46.957	8.286	310.773	2.177	47.203	10.016
2021-01-25 14:00:00		48.1475	47.6325	50.4475	50.6179	49.0833	3.72308	3.78163	3.93838	3.72033	5.238	4.6814	0	5060.24	-10.4975	-19.8537	-140.722	35.1669	18.1078													4568.16	-10.7418	-20.3049	-144.474	31.4267	17.9654	3.493	925.022	42.977	5.3	309.207	2.528	43.468	9.087	308.415	2.092	43.435	10.68
2021-01-25 15:00:00		48.0562	48.2737	50.5704	50.9304	49.86	2.67717	2.52687	2.68842	2.44733	3.60038	2.77099	0	4666.91	-10.7158	-20.2579	-143.869	32.3358	18.1939													4414.16	-10.887	-20.5747	-146.584	30.0511	18.0141	2.707	924.789	42.4	5.896	319.287	2.055	42.242	9.879	313.563	1.685	42.025	11.807
2021-01-25 16:00:00		52.4363	52.3937	55.2558	55.3862	55.6796	1.33296	1.27775	1.20021	1.05354	1.67346	0.399714	0	4509.76	-10.8436	-20.4962	-145.811	31.6018	18.1578													4282.75	-11.0853	-20.9428	-149.516	28.0474	18.0264	1.788	924.807	45.653	5.761	322.067	1.51	44.662	9.956	318.179	1.297	44.015	11.704
2021-01-25 17:00:00		58.0283	58.3225	61.9879	62.54	62.6904	0.231333	0.031625	-0.266292	-0.430667	0.1385	-1.27765	0	4565.84	-10.8896	-20.5847	-146.666	32.7608	18.0114													4237.66	-11.2526	-21.2542	-151.896	26.7114	18.1376	0.888	925.248	50.138	4.295	311.903	0.757	49.102	7.74	311.808	0.575	48.947	9.264
2021-01-25 18:00:00		60.66	61.1342	65.6412	66.2833	67.0375	0.184125	-0.036	-0.4465	-0.668042	-0.133	-1.60571	0	4601.6	-10.9816	-20.7599	-148.096	34.2277	17.9834													4346.71	-11.3648	-21.4642	-153.288	26.5681	18.4255	0.793	926.064	52.767	2.353	303.442	0.658	51.723	4.246	307.221	0.512	51.535	5.48
2021-01-25 19:00:00		58.3421	58.7054	63.1317	63.5692	64.1979	0.247042	0.081125	-0.267542	-0.513167	0.054875	-1.48367	0	4551.95	-11.2665	-21.299	-151.94	36.9879	18.4525													4452.04	-11.479	-21.6783	-154.728	26.5835	18.6976	0.868	927.086	50.49	2.857	306.726	0.797	49.018	5.025	314.413	0.68	48.428	6.986
2021-01-25 20:00:00		56.5958	56.8696	61.0933	61.0446	61.8146	0.461375	0.275042	0.01725	-0.174708	0.454833	-1.19485	0	4502.31	-11.5513	-21.8382	-155.784	39.7481	18.9216													4418.01	-11.6697	-22.0467	-157.996	32.5454	18.3778	0.992	927.844	49.04	2.48	324.673	0.963	47.198	5.532	336.538	0.862	46.445	7.213
2021-01-25 21:00:00		61.1238	61.3925	65.1342	65.3517	65.9479	-0.24475	-0.445792	-0.68025	-0.929333	-0.365292	-1.92081	0	4611.03	-11.6585	-22.04	-157.546	40.1941	18.7737													4383.97	-11.8604	-22.4152	-161.264	38.5074	18.0579	0.432	928.695	52.985	4.408	345.803	0.61	51.002	8.44	349.111	0.482	50.895	10.046
2021-01-25 22:00:00		66.3517	66.5575	70.1121	70.1575	70.1133	-0.726417	-0.872542	-1.03796	-1.28671	-0.569792	-1.7691	0	4745.72	-11.7367	-22.1865	-158.967	40.2608	18.5246													4474.67	-12.0795	-22.8259	-164.59	38.7265	18.0171	-0.077	929.474	58.203	3.14	304.734	0.248	55.152	5.464	311.98	0.155	54.622	6.764
2021-01-25 23:00:00		67.4879	67.6017	70.8017	70.4712	71.0417	-0.867958	-0.992833	-1.05925	-1.27621	-0.624083	-1.97658	0	4773.42	-11.9641	-22.6165	-162.576	42.3927	18.3564													4620.66	-12.311	-23.2553	-167.943	36.4	18.0998	-0.342	930.083	59.708	4.38	291.455	-0.252	57.222	7.807	300.65	-0.112	55.172	8.852
2021-01-26		67.7192	67.9767	71.55	71.3012	71.8388	-1.32346	-1.49554	-1.62862	-1.87017	-1.234	-2.49977	0	4704.72	-12.3261	-23.302	-168.155	46.3857	18.2612													4658.61	-12.5696	-23.7391	-171.831	36.1907	18.0824	-0.726	930.778	59.65	4.052	313.946	-0.535	56.722	8.09	319.232	-0.492	55.475	10.002
2021-01-26 01:00:00		65.8783	66.2754	70.6108	70.8213	70.9379	-1.31842	-1.52646	-1.81858	-2.12942	-1.44025	-2.73261	0	4610.7	-12.6902	-23.9874	-173.693	48.2747	18.2061													4503.77	-12.8762	-24.3198	-176.673	39.7594	17.886	-0.662	931.242	57.403	3.476	306.175	-0.455	54.388	5.915	312.05	-0.562	53.91	7.024
2021-01-26 02:00:00		62.3062	62.6112	66.6038	66.285	66.8996	-1.1545	-1.32679	-1.51075	-1.74792	-1.10171	-2.59649	0	4410.64	-13.0631	-24.6725	-179.061	41.3487	18.3194													4349.06	-13.1822	-24.8989	-181.499	43.14	17.6925	-0.507	931.964	54.01	3.494	299.778	-0.228	50.075	5.368	299.878	-0.283	48.85	5.771
2021-01-26 03:00:00		58.8758	58.9579	62.4992	62.2621	62.6633	-0.919917	-1.06571	-1.16367	-1.395	-0.694625	-2.13524	0	4210.58	-13.436	-25.3577	-184.429	34.4228	18.4327													4199	-13.4615	-25.4146	-185.712	39.4383	17.6045	-0.39	932.633	50.995	4.676	322.104	-0.455	49.353	8.018	321.959	-0.592	48.897	8.673
2021-01-26 04:00:00		60.6854	60.7067	63.8246	63.5288	64.2396	-1.35671	-1.46513	-1.51708	-1.72588	-1.09975	-2.4158	0	4171.56	-13.4465	-25.3754	-184.833	33.4069	18.1698													4048.94	-13.7408	-25.9303	-189.926	35.7367	17.5165	-0.838	933.112	52.953	5.034	326.792	-0.76	50.5	9.006	325.116	-0.812	49.545	10.414
2021-01-26 05:00:00		62.4375	62.5354	65.6542	65.345	65.8483	-1.83708	-1.95175	-2.01508	-2.23304	-1.5645	-2.84194	0	4158.96	-13.3975	-25.2837	-184.424	33.3604	17.8453													3931.62	-13.7815	-26.0051	-190.486	34.9764	17.555	-1.33	933.46	54.468	5.468	321.762	-1.094	51.617	10.268	317.45	-0.858	49.032	11.896
2021-01-26 06:00:00		61.34	62.2221	66.5604	67.3183	69.6708	-2.277	-2.63346	-3.15075	-3.578	-3.193	-4.25308	0	4152.4	-13.315	-25.1316	-183.126	34.5606	17.9266													3828.84	-13.7163	-25.8841	-189.423	35.5221	17.6497	-1.418	933.505	52.462	4.466	317.857	-0.99	47.992	9.08	320.604	-0.349	42.127	10.767
2021-01-26 07:00:00		57.7196	58.81	67.6596	69.5929	72.3542	-1.22817	-1.51892	-3.06254	-3.664	-3.40592	-4.70989	0	4151.3	-13.2024	-24.9251	-181.027	36.8843	18.3737													3807.03	-13.6015	-25.6714	-187.451	36.6555	17.9205	-1.073	933.826	51.2	2.188	338.571	-1.157	49.903	3.634	344.933	-1.121	48.532	4.564
2021-01-26 08:00:00		51.9167	50.9579	59.3829	59.0033	61.4188	1.06825	1.40488	0.102667	-0.164958	-0.027458	-1.96017	0	4154.33	-13.0788	-24.6977	-178.681	39.0599	18.9006													3929.59	-13.3983	-25.2953	-183.857	38.8367	18.5054	0.577	934.539	48.16	1.858	324.895	-0.202	48.453	3.547	322.142	-0.484	47.34	5.779
2021-01-26 09:00:00		48.1938	46.1112	51.6092	51.6179	52.2596	2.8905	3.50917	2.91567	2.50054	3.00088	1.15151	0	4174.65	-12.9092	-24.3832	-175.304	40.6149	19.7619													4061.63	-13.186	-24.902	-180.152	40.9613	19.0639	2.127	935.534	44.915	1.814	350.362	1.142	45.745	3.264	332.818	0.76	45.372	4.644
2021-01-26 10:00:00		44.5625	43.3504	45.9283	46.2104	46.1796	4.25175	4.63404	4.85137	4.40283	5.27083	4.70777	0	4194.98	-12.7397	-24.0687	-171.926	42.1699	20.6232													4548.2	-12.6308	-23.8623	-172.266	40.9685	18.632	3.297	936.124	44.197	2.209	250.508	2.277	44.177	2.954	275.875	1.953	42.853	3.205
2021-01-26 11:00:00		54.0662	53.6138	55.0546	54.8813	52.5513	4.09488	4.11925	4.681	4.46754	6.0695	6.55992	0	4494.08	-12.3395	-23.3194	-165.754	42.3317	20.8012													5034.76	-12.0755	-22.8225	-164.38	40.9757	18.2002	3.322	936.56	50.918	2.503	269.901	2.173	52.818	3.218	281.86	1.923	51.423	3.612
2021-01-26 12:00:00		43.9383	43.1746	47.2221	46.6317	43.3058	6.11217	6.25125	6.13288	5.98725	8.01067	6.93582	0	4838.83	-11.9015	-22.4989	-159.124	42.2655	20.8673																			5.308	937.249	41.357	2.282	84.491	4.295	42.103	2.794	87.227	3.85	41.832	2.51
2021-01-26 13:00:00		38.5308	37.6379	39.11	39.4796	37.4888	6.51562	6.71254	7.47621	6.98438	8.69083	7.93933	0																									6.187	937.363	34.617	2.436	209.04	5.013	35.385	3.354	221.778	4.637	34.292	3.044
2021-01-26 14:00:00		35.7675	35.0796	37.5108	37.3733	35.775	6.00708	6.06246	6.24733	6.00371	7.73708	6.58425	0																									5.833	936.813	31.227	3.316	328.279	4.863	31.648	5.209	325.375	4.48	30.932	6.121
2021-01-26 15:00:00		36.0033	35.5112	37.8192	37.9779	37.4379	4.47687	4.50504	4.63221	4.38408	5.26421	4.01774	0																									4.768	936.125	30.817	3.683	307.872	4.197	30.21	5.749	307.026	3.912	28.952	6.496
2021-01-26 16:00:00		45.0333	44.5367	46.4433	46.6479	46.6337	3.09046	3.09621	3.2265	2.98571	3.68788	2.56952	0																									3.473	935.929	39.355	3.561	290.297	3.063	38.88	6.399	290.119	2.86	37.703	7.539
2021-01-26 17:00:00		54.0825	53.8042	56.0171	56.0337	56.315	1.92762	1.89854	1.95721	1.73104	2.40404	1.31026	0																									2.367	935.914	47.588	3.993	291.327	2.19	45.715	6.959	294.863	2.117	43.552	7.939
2021-01-26 18:00:00		57.4858	57.2296	59.5117	59.3825	59.6975	1.28567	1.23212	1.31746	1.09025	1.76108	0.596652	0																									1.69	936.281	50.782	4.348	302.737	1.472	49.467	7.779	306.374	1.413	47.857	8.898
2021-01-26 19:00:00		56.6737	56.4079	58.6867	58.4438	58.8104	1.25742	1.19158	1.32888	1.13037	1.79575	0.894737	0																									1.622	936.469	49.938	4.773	303.458	1.343	48.437	8.88	307.616	1.52	44.842	10.95
2021-01-26 20:00:00		52.6054	52.57	55.5662	55.4779	56.3075	1.11888	0.930542	0.895583	0.622667	1.29046	0.125512	0																									1.63	936.558	45.592	4.161	312.534	1.622	43.222	7.445	313.401	1.99	38.618	8.984
2021-01-26 21:00:00		49.0758	49.0379	52.55	52.2938	52.7883	1.02242	0.82725	0.657875	0.457625	1.10667	-0.577312	0																									1.503	937.06	42.157	2.363	344.5	2.227	35.6	5.267	324.181	2.535	30.81	6.653
2021-01-26 22:00:00		44.4746	44.4483	48.1996	47.9546	49.1425	1.05954	0.825917	0.560458	0.32625	0.957042	-0.661687	0																									1.487	937.475	38.305	4.068	309.969	1.878	34.82	7.631	308.333	2.263	30.482	8.269
2021-01-26 23:00:00		55.5821	56.5	59.2846	61.8417	64.7537	-0.031125	-0.495292	-0.950333	-1.58333	-1.23796	-2.03578	0																									0.618	937.461	48.515	2.336	323.487	1.362	37.043	5.916	311.964	1.625	33.152	8.229
2021-01-27		53.6021	54.4221	59.4671	62.0575	65.8467	-0.2185	-0.670958	-1.32079	-1.95708	-1.62987	-2.51028	0																									0.54	937.343	45.957	1.174	14.444	1.57	36.307	1.004	311.686	1.947	31.325	1.976
2021-01-27 01:00:00		52.2175	53.5146	58.0392	61.1704	64.9354	-0.039542	-0.532458	-1.04079	-1.68892	-1.28004	-1.95961	0																									0.635	937.378	45.32	1.719	347.233	1.275	37.122	2.28	310.499	1.938	30.797	2.874
2021-01-27 02:00:00	-0.329981	63.5787	64.3192	67.4879	71.3575	74.3896	-1.14125	-1.53575	-1.95913	-2.54754	-2.07917	-2.0397	0																									-0.47	937.059	56.022	0.98	72.246	-0.25	51.505	1.476	353.538	0.985	37.08	2.756
2021-01-27 03:00:00	-0.359232	68.9104	69.5783	72.3113	75.6988	78.8117	-1.75717	-2.03983	-2.26004	-2.74904	-2.20987	-2.21721	0																									-1.222	936.647	61.295	0.848	182.255	-0.842	55.67	1.881	165.374	0.793	38.32	1.846
2021-01-27 04:00:00	-0.150472	63.6887	64.7046	69.69	73.7225	78.0554	-0.857042	-1.18254	-1.44304	-1.88408	-1.32025	-1.41532	0																									-0.355	936.375	55.662	0.944	35.2	-0.212	50.613	1.061	115.975	0.915	39.337	1.824
2021-01-27 05:00:00	-0.085697	64.5279	65.2892	69.2883	72.4154	73.725	-0.723375	-0.875167	-0.761167	-1.04371	-0.394208	-0.449853	0																									-0.34	936.057	56.637	1.105	41.525	0.375	47.552	1.363	64.388	1.5	38.355	1.764
2021-01-27 06:00:00	0.130345	68.35	68.5183	71.3075	73	75.2417	-1.32758	-1.45692	-1.32854	-1.62712	-0.95825	-1.17069	0																									-0.986	935.818	61.307	0.818	73.328	-0.734	55.812	1.4	104.692	0.74	47.305	2.788
2021-01-27 07:00:00	46.1339	64.2696	65.2733	70.9792	73.0379	76.3863	-0.810917	-1.09758	-1.76758	-2.19137	-1.74446	-2.32964	0																									-0.562	935.488	57.143	1.756	47.479	-0.185	54.213	2.382	89.415	0.607	52.722	2.399
2021-01-27 08:00:00	208.218	54.2483	53.2488	62.0796	62.7508	64.0871	3.18975	3.3515	1.88546	1.50983	1.95687	0.175889	0																									2.19	935.524	51.67	1.635	10.287	1.788	51.5	2.446	3.26	2.822	46.873	3.314
2021-01-27 09:00:00	296.819	58.9192	57.1533	61.0075	60.8992	62.4763	3.83867	4.27567	4.00121	3.69013	4.16654	2.83553	0																									2.725	935.061	57.668	1.486	178.995	2.573	56.202	2.106	267.333	4.447	49.255	4.824
2021-01-27 10:00:00	343.653	58.2358	57.0192	58.0825	58.0254	57.585	4.29312	4.50792	5.16125	4.88513	6.08321	5.65945	0																									3.545	935.095	54.977	1.227	119.949	2.862	56.677	1.356	153.634	4.807	53.685	2.499
2021-01-27 11:00:00	390.477	54.9725	54.5346	55.7533	55.4279	53.8871	5.56992	5.54671	6.16737	5.93696	7.2515	7.35141	0																			6051.41	-11.3195	-21.4059	-157.248	41.0001	13.9991	4.8	935.484	51.887	1.903	102.958	3.81	53.797	1.876	106.175	3.815	54.153	1.508
2021-01-27 12:00:00	434.587	53.4479	52.8162	55.34	54.78	52.1871	8.17458	8.18908	8.42917	8.17796	10.0658	9.1868	0													7744.9	-12.0437	-22.7691	-168.553	44.6329	13.6001	6220.86	-11.3075	-21.3829	-157.376	40.7009	13.6868	7.168	936.017	51.093	1.623	109.302	6.515	52.623	1.802	115.509	6.865	52.727	1.451
2021-01-27 13:00:00	367.666	54.3754	53.3987	54.5812	54.6063	51.9004	11.8938	11.9588	12.6942	12.3079	13.8342	12.7119	0													8021.25	-11.818	-22.3415	-165.966	42.1233	12.7664	6947.38	-11.3489	-21.4576	-158.876	39.1431	12.7847	11.58	935.822	50.06	1.784	110.676	10.413	52.343	2.112	92.96	10.04	53.222	2.313
2021-01-27 14:00:00	193.725	59.2892	58.415	59.4883	59.1854	57.6179	10.2413	10.1692	10.801	10.5718	11.6642	10.7959	0							9001.15	-12.0533	-22.7682	-171.55	34.12	10.5953	8297.6	-11.5923	-21.9139	-163.378	39.6137	11.9327	7673.9	-11.3902	-21.5322	-160.375	37.5852	11.8826	10.007	935.213	54.588	4.206	284.581	9.242	56.227	6.59	291.18	9.255	56.52	7.676
2021-01-27 15:00:00	97.656	64.1392	64.4608	66.6892	66.2783	65.2283	9.59458	9.21521	9.46508	9.19546	10.1304	8.53356	0							9057.48	-11.7024	-22.1112	-166.351	34.6166	10.5394	8573.95	-11.3665	-21.4862	-160.791	37.1041	11.0991	8400.41	-11.4316	-21.6069	-161.875	36.0274	10.9805	9.563	934.487	58.98	4.831	268.333	9.098	59.773	7.72	272.791	9.075	60.168	8.62
2021-01-27 16:00:00	7.54066	68.725	68.5563	71.16	70.8208	70.7804	8.74921	8.57517	8.673	8.377	8.97875	6.95176	0	9152.85	-11.0372	-20.8681	-156.879	36.4816	10.0657	9113.8	-11.3515	-21.4543	-161.151	35.1132	10.4836	8850.3	-11.1408	-21.0586	-158.204	34.5945	10.2654	9126.93	-11.473	-21.6816	-163.374	34.4696	10.0783	9.105	934.458	62.508	4.008	295.974	8.842	62.38	6.894	297.395	8.698	62.875	8.428
2021-01-27 17:00:00	-0.261045	73.0192	73.0896	76.2796	76.1717	76.0167	7.5335	7.26279	7.27304	6.90658	7.52446	5.53043	0	9238.75	-10.7768	-20.384	-152.456	38.8246	10.6164	9170.13	-11.0006	-20.7974	-155.952	35.6097	10.4277	9126.66	-10.9151	-20.631	-155.616	32.0849	9.43167	9473.93	-11.3015	-21.3611	-160.665	35.0691	10.2236	7.92	934.653	66.762	3.13	289.174	8.048	64.905	5.449	298.616	8.1	64.642	7.315
2021-01-27 18:00:00	-0.281343	74.64	74.7412	77.8454	77.7154	77.9704	7.10604	6.82475	6.87208	6.54508	7.05283	5.36234	0	9324.65	-10.5164	-19.8999	-148.032	41.1675	11.167	9226.46	-10.6497	-20.1405	-150.752	36.1063	10.3718	9335.64	-10.72	-20.2637	-152.792	31.2545	9.31735	9478.41	-10.938	-20.6839	-154.157	37.6158	11.3143	7.643	934.963	67.917	4.093	268.137	7.937	65.213	6.312	277.585	7.99	64.948	7.557
2021-01-27 19:00:00	-0.244635	74.1167	74.3804	77.9142	77.7308	77.7358	7.42679	7.11317	7.08417	6.77163	7.32329	5.43945	0	9410.55	-10.256	-19.4158	-143.609	43.5105	11.7176	9300.23	-10.387	-19.6493	-146.708	36.7683	10.4861	9424.66	-10.5794	-20.0039	-149.547	33.4143	10.4841	9482.88	-10.5745	-20.0067	-147.649	40.1625	12.4049	8.042	935.069	66.808	4.692	255.564	8.198	64.573	6.777	258.31	8.105	64.897	7.341
2021-01-27 20:00:00	-0.102343	72.5579	72.6246	75.7942	75.5821	75.605	8.02792	7.76058	7.87462	7.56829	8.09283	6.30485	0	9496.01	-10.0119	-18.962	-139.43	45.6728	12.266	9446.93	-10.4932	-19.851	-147.496	38.1222	11.312	9513.68	-10.4387	-19.7441	-146.302	35.5741	11.6508	9487.36	-10.2109	-19.3295	-141.141	42.7091	13.4955	8.505	935.332	65.58	4.481	258.861	8.395	64.35	6.568	259.13	8.243	64.827	6.736
2021-01-27 21:00:00	-0.069427	68.0583	67.9492	70.7796	70.2533	70.505	9.22208	8.97083	9.19542	8.95833	9.43542	7.61955	0	9565.19	-10.3739	-19.6324	-144.325	41.1438	12.7343	9593.63	-10.5994	-20.0527	-148.284	39.4761	12.1379	9602.7	-10.2981	-19.4843	-143.057	37.7339	12.8175	9491.83	-9.84739	-18.6523	-134.633	45.2558	14.5861	9.55	935.53	61.292	4.77	270.873	9.3	60.523	7.204	268.663	9.19	60.582	7.686
2021-01-27 22:00:00		70.3225	70.0717	72.3438	71.8221	72.2517	8.95417	8.74917	9.06208	8.78292	9.26583	7.51978	0	9634.38	-10.7358	-20.3028	-149.22	36.6148	13.2026	9740.33	-10.7056	-20.2544	-149.071	40.8299	12.9638	9691.72	-10.1575	-19.2245	-139.811	39.8937	13.9842	9568.27	-10.1465	-19.2093	-139.061	43.0212	14.6135	9.242	935.679	64.048	6.836	316.349	8.973	63.452	11.605	316.777	8.883	63.425	12.565
2021-01-27 23:00:00		75.3417	75.2242	77.9412	77.2904	77.5608	8.03767	7.80183	7.95362	7.70242	8.26708	6.47182	0	9703.56	-11.0978	-20.9732	-154.115	32.0857	13.6709	9887.04	-10.8118	-20.4561	-149.859	42.1838	13.7897	9765.79	-10.3174	-19.5238	-142.059	39.6538	14.1309	9656.5	-10.5543	-19.9685	-145.281	40.0029	14.4667	8.353	935.842	69.453	6.1	305.542	8.217	68.145	11.25	304.668	8.27	67.113	12.747
2021-01-28		75.1317	75.0721	77.7667	77.0804	77.7017	7.84213	7.61304	7.78067	7.51938	7.99796	6.08145	0	9772.75	-11.4597	-21.6436	-159.01	27.5567	14.1392	10006.9	-10.9332	-20.6832	-151.433	41.891	14.0323	9833.25	-10.6102	-20.0707	-146.739	38.3516	13.8261	9744.73	-10.9621	-20.7277	-151.502	36.9847	14.3199	8.213	935.579	68.875	5.095	306.964	8.193	66.987	9.902	302.805	8.192	66.443	12.014
2021-01-28 01:00:00		77.7742	77.715	80.2392	79.7412	80.2979	7.21479	6.99304	7.15521	6.85529	7.35575	5.55821	0	9952.67	-11.6075	-21.9171	-161.143	25.536	14.1935	10102.7	-11.0682	-20.933	-153.714	40.1166	13.7502	9900.71	-10.9031	-20.6175	-151.419	37.0493	13.5212	9832.97	-11.3698	-21.4869	-157.722	33.9665	14.1731	7.633	935.53	71.85	5.683	309.514	7.823	69.347	10.362	309.195	7.848	68.778	11.902
2021-01-28 02:00:00	-0.147613	80.8354	81.0625	84.2458	83.8333	83.9583	6.88271	6.61088	6.61463	6.28046	6.88367	5.13079	0	10329.8	-11.3741	-21.4839	-158.361	27.9811	13.5109	10198.5	-11.2032	-21.1829	-155.995	38.3422	13.468	9968.17	-11.196	-21.1644	-156.099	35.747	13.2164	9993.04	-11.614	-21.9407	-161.629	31.7695	13.8964	7.422	935.347	74.695	5.043	293.369	7.625	72.037	8.625	294.423	7.522	72.277	9.297
2021-01-28 03:00:00	-0.061089	78.4788	78.7887	82.4833	81.9583	81.8542	7.60867	7.31192	7.25237	6.94562	7.5785	5.55246	0	10706.8	-11.1406	-21.0508	-155.578	30.4262	12.8282	10294.3	-11.3382	-21.4328	-158.276	36.5678	13.1859	10045.7	-11.4683	-21.6728	-160.484	34.4499	12.8976	10453.5	-11.1738	-21.1174	-155.863	33.0073	13.0767	8.143	935.034	71.91	4.419	274.728	8.278	69.64	6.912	277.649	8.123	70.263	7.56
2021-01-28 04:00:00	-0.054057	78.2529	78.4313	81.75	81.175	81.3125	8.44225	8.16662	8.19733	7.91988	8.48704	6.38377	0	11083.9	-10.9072	-20.6176	-152.795	32.8713	12.1456	10390	-11.4732	-21.6826	-160.557	34.7934	12.9037	10489.6	-10.9934	-20.7797	-154.166	33.3415	12.0712	10914	-10.7337	-20.2941	-150.096	34.245	12.2571	8.88	935.011	72.208	4.305	288.811	8.83	71.082	6.999	285.169	8.665	71.995	7.691
2021-01-28 05:00:00	-0.064071	80.3388	80.3942	83.35	82.6625	82.8208	9.34958	9.09958	9.22917	8.97167	9.52	7.50668	0	11461	-10.6737	-20.1844	-150.012	35.3165	11.4629	10708.9	-11.0527	-20.8922	-154.953	34.0686	12.1838	10933.5	-10.5185	-19.8866	-147.848	32.2332	11.2448	11374.5	-10.2936	-19.4708	-144.329	35.4827	11.4374	9.705	934.787	75.193	4.126	290.754	9.485	74.735	6.55	284.553	9.322	75.89	7.331
2021-01-28 06:00:00	0.772879	82.3208	82.3417	85.2583	84.6625	84.7417	9.31958	9.07542	9.18333	8.89583	9.48667	7.53126	0	11646	-10.3572	-19.5901	-145.735	35.2188	10.9856	11064.1	-10.5417	-19.9324	-148.067	33.5146	11.3925	11377.3	-10.0436	-18.9935	-141.53	31.1248	10.4184	11835	-9.85342	-18.6475	-138.562	36.7204	10.6178	9.7	934.674	77.337	4.586	304.958	9.523	76.673	8.481	300.748	9.432	77.535	9.959
2021-01-28 07:00:00	29.546	81.7208	81.7042	84.6667	84.0708	84.025	9.49917	9.325	9.46792	9.19833	9.7725	7.95516	0	11746.1	-10.0038	-18.9245	-140.797	33.9951	10.5993	11419.3	-10.0308	-18.9726	-141.18	32.9606	10.6013	11821.2	-9.56875	-18.1005	-135.212	30.0164	9.59208	11923.5	-9.58184	-18.1373	-135.121	36.3589	9.97757	9.867	934.582	76.748	4.053	291.509	9.615	76.205	6.773	289.692	9.443	77.258	8.166
2021-01-28 08:00:00	156.936	78.1488	77.605	80.5596	79.9188	80.0263	10.2696	10.2008	10.4358	10.2175	10.7263	9.17956	0	11846.1	-9.65043	-18.2589	-135.858	32.7714	10.213	11774.5	-9.51982	-18.0129	-134.293	32.4065	9.81008	12106.1	-9.26059	-17.521	-131.113	29.3108	9.05476	11677.4	-9.46179	-17.9085	-133.769	34.5599	9.4987	10.277	934.47	74.075	4.364	292.56	9.657	74.918	7.421	292.709	9.507	75.777	8.291
2021-01-28 09:00:00	248.485	73.8713	72.8046	74.7938	74.3771	74.495	11.4071	11.4767	11.9183	11.7142	12.1767	10.9837	0	11946.1	-9.29705	-17.5932	-130.919	31.5477	9.82665													11431.4	-9.34173	-17.6797	-132.418	32.7609	9.01984	11.12	934.782	70.392	3.13	285.197	10.18	72.705	5.444	282.727	9.815	74.317	6.417
2021-01-28 10:00:00	304.664	64.6175	63.7542	65.5421	64.9767	65.1375	12.7658	12.7583	13.3396	13.1375	13.6058	12.8129	0	12037.6	-8.95353	-16.9461	-126.133	30.3489	9.43656													11185.4	-9.22167	-17.4509	-131.066	30.9619	8.54098	12.638	935.145	59.617	4.106	265.831	11.638	61.448	6.587	269.458	11.257	62.377	7.222
2021-01-28 11:00:00	538.43	58.5846	57.4412	57.8746	57.2333	56.8008	14.1512	14.2592	15.2767	15.1329	15.8717	16.4197	0	11818.7	-8.97185	-16.98	-126.932	30.0684	8.90854													10939.4	-9.10162	-17.2221	-129.715	29.1629	8.06211	13.768	935.524	54.318	5.764	307.649	12.29	57.653	9.625	307.794	11.818	58.955	10.981
2021-01-28 12:00:00	492.549	57.3583	56.0458	56.1008	55.3796	54.5633	14.6817	14.7688	15.8537	15.7433	16.5479	17.0208	0	11599.7	-8.99016	-17.0139	-127.731	29.7879	8.38052													11144	-9.06453	-17.154	-129.237	29.9935	7.99465	14.278	935.796	53.122	5.228	296.346	12.847	56.352	8.59	298.869	12.322	57.765	9.45
2021-01-28 13:00:00	308.381	61.5692	60.3204	60.0371	59.7367	59.1492	13.9146	13.9375	15.0154	14.7983	15.5229	15.1502	0	11668.1	-8.97025	-16.9758	-127.569	29.3964	8.23675													11422.5	-9.04107	-17.1123	-128.903	31.2557	7.99471	13.63	935.626	57.288	5.242	291.355	12.417	60.212	8.514	295	12.045	61.147	9.646
2021-01-28 14:00:00	168.828	65.0842	64.1208	64.5229	64.0017	64.0475	13.2117	13.1858	13.9975	13.8763	14.3275	13.4336	0	11865.2	-8.9332	-16.9053	-126.978	28.9551	8.26518													11577.8	-9.00248	-17.0389	-128.433	30.7599	7.87745	12.907	935.343	61.355	4.552	280.586	11.963	63.443	7.024	277.466	11.668	64.135	7.902
2021-01-28 15:00:00	66.9392	70.4471	69.7967	70.6937	70.055	70.4442	11.6463	11.5946	12.1225	12.0829	12.425	11.4188	0	11979.2	-8.88062	-16.8073	-126.376	29.3843	8.08311													11621.1	-8.95016	-16.9367	-127.84	28.6675	7.65364	11.79	934.605	65.335	4.277	258.953	11.117	66.515	6.862	259.904	10.832	67.348	7.586
2021-01-28 16:00:00	9.48015	72.4179	72.0138	73.5642	73.0637	73.2496	11.1629	11.0504	11.3975	11.3071	11.7058	10.4584	0	11943.6	-8.80008	-16.6597	-125.756	31.3791	7.52244													11713.2	-8.87625	-16.7951	-126.937	27.2105	7.42335	11.468	934.327	67.002	4.34	257.604	10.958	67.622	6.918	256.037	10.775	68.24	8.068
2021-01-28 17:00:00	-0.375395	77.4771	77.4629	79.6629	79.3167	79.6654	10.3417	10.0738	10.1729	9.98667	10.4413	8.62758	0	11915.4	-8.71872	-16.5105	-125.112	33.3517	6.97186													12012.4	-8.71072	-16.4863	-124.725	28.4515	7.16558	10.875	934.367	71.652	3.342	259.093	10.818	70.793	5.7	256.259	10.705	71.385	6.467
2021-01-28 18:00:00	-0.364053	78.8396	78.9587	81.9917	81.3417	82.0917	10.5	10.1783	10.1896	10.0013	10.4021	8.03389	0	12185.2	-8.60379	-16.2966	-123.544	34.431	6.82884													12311.6	-8.54518	-16.1776	-122.513	29.6925	6.9078	10.923	934.643	73.348	2.449	288.448	10.938	71.785	4.383	283.707	10.84	72.273	4.776
2021-01-28 19:00:00	-0.374324	83.025	83.0375	85.6292	85.0667	85.7417	9.88833	9.60875	9.70042	9.505	9.94708	7.80155	0	12455	-8.48887	-16.0826	-121.975	35.5102	6.68582													12682.9	-8.40602	-15.9099	-120.318	26.4184	6.96132	10.327	934.99	78.327	2.949	303.816	10.303	77.307	5.536	301.195	10.215	78.788	6.418
2021-01-28 20:00:00	-0.385748	87.8375	87.7667	90.1292	89.55	90.0583	9.46083	9.20208	9.36	9.14833	9.61625	7.73552	0	12862.9	-8.3716	-15.8588	-119.878	33.681	6.99221													13066.2	-8.27125	-15.6491	-118.126	22.3944	7.06655	9.853	935.231	84.807	3.181	303.25	9.922	83.613	6.224	297.515	10.057	84.715	7.34
2021-01-28 21:00:00	-0.449371	89.1958	89.0583	91.5708	90.8083	91.25	9.79667	9.52667	9.70042	9.52333	9.98833	8.25724	0	13332.7	-8.25328	-15.6305	-117.544	30.5487	7.49994													13326.1	-8.19153	-15.4994	-116.619	22.4806	7.3767	10.182	935.303	86.513	4.481	294.484	10.148	84.717	7.194	296.168	10.327	84.62	8.37
2021-01-28 22:00:00		88.7917	88.7208	91.5333	90.7458	91.0292	9.90875	9.63083	9.7625	9.58042	10.065	8.2455	0	13562.6	-8.18716	-15.5051	-116.266	29.9068	7.77473													13473.9	-8.16179	-15.4506	-115.732	26.2974	7.87287	10.28	935.158	85.578	4.429	308.197	10.342	82.992	8.099	305.325	10.563	81.48	9.765
2021-01-28 23:00:00		87.2042	87.2167	90.1375	89.45	89.6708	9.755	9.47333	9.59625	9.395	9.90333	8.09748	0	13361.4	-8.21482	-15.5642	-116.883	33.7384	7.6311													13557	-8.14252	-15.4216	-115.213	30.1706	8.16034	10.155	934.938	82.913	4.545	299.063	10.082	80.893	7.765	299.014	10.187	79.8	9.306
2021-01-29		87.6417	87.6208	90.3708	89.6667	90.1208	9.58917	9.31667	9.48958	9.3025	9.75	8.09753	0	13164.9	-8.24143	-15.6212	-117.486	37.4788	7.48379													13365.9	-8.16758	-15.4764	-116.248	34.2829	7.56367	9.93	934.579	83.883	2.945	306.541	9.777	82.72	4.911	301.316	9.883	82.738	5.797
2021-01-29 01:00:00		87.7542	87.6333	90.1625	89.4667	89.8917	9.49417	9.22125	9.43458	9.255	9.71583	8.14645	0	13156.6	-8.22544	-15.5912	-117.542	37.5334	7.18786													13174.8	-8.19265	-15.5312	-117.283	38.3952	6.96699	9.823	934.405	84.052	3.213	311.049	9.632	83.363	6.224	305.698	9.628	84.605	7.61
2021-01-29 02:00:00	-0.0764	85.9	85.9833	89.15	88.2292	88.6667	9.85042	9.54417	9.70042	9.53333	9.98208	8.35033	0	13148.2	-8.20944	-15.5613	-117.598	37.588	6.89192													13036.9	-8.25595	-15.6409	-117.948	33.4211	7.17975	10.18	934.085	81.432	2.828	301.59	10.073	79.588	5.834	297.18	10.238	78.658	7.522
2021-01-29 03:00:00	-0.101989	82.7875	83.0042	86.5208	85.7167	85.8417	10.3042	9.96875	10.0687	9.85792	10.3554	8.55307	0	13173	-8.18574	-15.5112	-117.659	34.6396	6.43072													12907.7	-8.3256	-15.7598	-118.551	26.9386	7.52689	10.655	933.763	77.512	2.532	307.758	10.522	75.878	5.536	294.811	10.493	75.793	7.581
2021-01-29 04:00:00	-0.261445	88.6208	88.425	90.1333	90.4042	90.7417	9.22458	8.99417	9.28	9.00333	9.47375	8.10185	0	13212.5	-8.15859	-15.4522	-117.722	30.3486	5.89564													12951.4	-8.34624	-15.7968	-118.961	25.9738	7.4129	9.633	933.426	84.9	2.348	312.467	9.708	81.5	4.9	301.742	9.877	80.398	6.267
2021-01-29 05:00:00	-0.36936	93	93.1	95.3833	95.85	96.025	8.55667	8.22188	8.32308	8.02033	8.48133	7.18223	0	13206.6	-8.20217	-15.5301	-118.576	28.2345	5.66556													13151.8	-8.32244	-15.7596	-119.196	30.0138	6.88067	8.998	933.093	92.592	2.005	280.987	8.953	88.533	3.134	273.027	9.175	88.435	3.67
2021-01-29 06:00:00	0.087598	93.9917	94.5625	97.9208	98.5	99.1458	8.26763	7.81404	7.60871	7.22992	7.62579	5.57677	0	13119.2	-8.37263	-15.8539	-120.848	30.0255	5.98265													13325	-8.37939	-15.8724	-120.316	33.1664	6.66329	8.893	932.742	92.927	1.855	280.947	9.067	87.542	3.354	268.889	8.995	90.73	4.686
2021-01-29 07:00:00	57.8216	90.7167	91.0333	95.9208	95.6292	95.9292	9.10625	8.775	8.63162	8.38687	8.885	7.1121	0	13041.3	-8.54534	-16.1818	-123.138	31.802	6.3163													13382.8	-8.77759	-16.6195	-125.18	32.5691	7.77639	9.24	932.599	90.148	2.221	294.825	8.992	87.723	3.853	283.787	9.038	89.715	4.817
2021-01-29 08:00:00	78.7256	89.4167	89.3833	92.5458	92.1625	92.3542	9.59875	9.43875	9.68292	9.51542	9.99125	8.62886	0	13338.6	-8.80718	-16.676	-126.104	33.0034	7.30405													13440.7	-9.17579	-17.3666	-130.043	31.9719	8.88949	9.858	931.985	87.002	2.262	312.452	9.472	85.683	4.589	297.895	9.463	86.613	6.164
2021-01-29 09:00:00	205.356	84.9858	84.5333	87.2604	86.8121	86.4583	10.4742	10.4067	10.8392	10.6425	11.1554	10.0508	0	13635.9	-9.06903	-17.1702	-129.07	34.2047	8.29181													12557.5	-9.23621	-17.4822	-130.202	33.0704	9.65574	10.503	931.557	82.257	2.384	288.191	9.772	82.935	4.655	287.121	9.563	84.813	6.079
2021-01-29 10:00:00	436.263	62.8821	62.0187	64.5754	64.4092	64.0996	13.0683	13.0642	13.6442	13.4275	13.9292	13.1198	0	12652.9	-9.11751	-17.2628	-128.717	34.9726	9.38477													11518.9	-9.24085	-17.4935	-129.583	34.4489	10.3647	12.865	931.523	57.752	3.804	266.207	11.705	59.348	6.504	271.947	11.293	60.168	7.916
2021-01-29 11:00:00	402.006	55.0354	54.2179	55.5396	55.12	54.7079	13.2258	13.1704	13.9408	13.7867	14.4475	14.2607	0	11098.7	-9.07078	-17.1761	-126.884	35.547	10.5247													10375.9	-9.27624	-17.5571	-129.536	32.9342	10.921	13.043	931.383	49.78	5.531	289.269	11.842	51.705	9.838	290.506	11.4	52.478	11.062
2021-01-29 12:00:00	301.548	49.7283	48.8563	50.08	49.5292	49.2196	12.8296	12.7254	13.5225	13.2958	14.0021	13.4517	0	9883.61	-9.05067	-17.1364	-125.634	34.5262	11.4576													9138.32	-9.33947	-17.6682	-130.006	28.7986	11.3389	12.768	931.115	44.317	6.375	293.924	11.758	45.367	11.094	294.964	11.355	45.518	12.583
2021-01-29 13:00:00	273.089	49.6058	48.7446	50.0321	49.5454	49.0138	12.375	12.3179	12.9733	12.7008	13.6567	12.7271	0	9276.69	-9.0783	-17.1811	-125.429	30.6448	12.0192													8184.82	-9.35927	-17.6987	-129.909	25.1997	11.6803	12.41	930.648	44.183	7.417	297.007	11.425	45.387	12.878	296.227	11.038	45.643	14.643
2021-01-29 14:00:00	149.061	51.7233	51.02	52.6058	51.9921	51.5554	12.0254	11.8338	12.3942	12.1433	12.9575	11.7974	0	8684.06	-9.10554	-17.2254	-125.231	26.9595	12.5718													8429.79	-9.1959	-17.3893	-127.416	23.865	11.6987	12.048	930.353	46.182	5.751	303.01	11.238	47.065	10.028	302.136	10.885	47.378	11.937
2021-01-29 15:00:00	73.7819	56.3171	55.7117	57.3417	56.7488	56.8525	11.0488	10.8387	11.3338	11.1171	11.6942	10.3745	0	8639.19	-9.11837	-17.2566	-125.275	30.7946	12.7777													8674.77	-9.03252	-17.08	-124.923	22.5303	11.717	11.28	930.158	50.213	4.955	297.519	10.69	50.642	9.002	298.412	10.402	50.993	10.694
2021-01-29 16:00:00	13.3381	57.5196	57.145	59.5992	59.0192	59.0667	9.94375	9.71917	9.935	9.72375	10.2933	8.58249	0	8594.33	-9.13119	-17.2878	-125.319	34.6296	12.9837													8575.43	-9.09131	-17.1937	-125.317	24.2837	12.2324	10.352	930.157	50.875	4.795	292.509	10.057	50.513	8.681	293.608	9.87	50.525	9.972
2021-01-29 17:00:00	-0.354083	61.2654	61.1517	64.2696	63.8746	63.8188	8.7675	8.56458	8.55833	8.2735	8.86833	6.87384	0	8558.46	-9.14457	-17.3099	-125.484	32.9911	12.9955													8419.57	-9.18655	-17.3768	-126.185	26.5439	12.8293	9.345	930.245	54.117	3.078	287.275	9.35	52.888	5.57	290.306	9.342	52.112	6.496
2021-01-29 18:00:00	-0.370647	63.715	63.6671	66.7613	66.5225	66.3667	8.10396	7.88808	7.89467	7.57675	8.21533	6.4974	0	8526.61	-9.15821	-17.3279	-125.703	28.9168	12.921													8325.58	-9.18848	-17.3806	-126.024	26.6391	13.0204	8.663	930.388	56.657	2.96	270.98	8.625	55.267	5.767	275.245	8.663	53.847	7.768
2021-01-29 19:00:00	-0.305532	65.7913	65.8867	69.4042	69.1554	68.6287	7.70679	7.47629	7.44287	7.145	7.83525	6.32613	0	8473.54	-9.14665	-17.3007	-125.515	25.972	12.8914													8287.44	-9.10617	-17.2225	-124.935	24.7803	12.8453	8.26	930.539	58.527	3.172	254.335	8.228	56.772	5.959	257.595	8.332	55.197	7.242
2021-01-29 20:00:00	-0.348913	65.205	65.1517	68.3679	68.0921	67.6033	7.45404	7.24425	7.27925	6.96192	7.64262	5.98004	0	8382.53	-9.09004	-17.1927	-124.599	25.0467	12.9423													8256.58	-9.03371	-17.0844	-124.003	23.7265	12.6724	7.967	930.891	57.983	3.12	246.116	7.922	56.633	5.954	254.597	8.022	55.563	7.318
2021-01-29 21:00:00	-0.345612	68.0733	68.2175	71.7875	71.3775	71.1192	6.8505	6.60308	6.52646	6.23396	6.87042	5.16842	0	8293.8	-9.03497	-17.0877	-123.714	24.2235	12.9876													8256.36	-9.00278	-17.0307	-123.737	26.0615	12.5086	7.34	931.286	61.195	3.489	274.764	7.528	58.857	7.044	273.219	7.647	57.687	8.923
2021-01-29 22:00:00		71.8046	71.9246	74.9788	74.9712	74.9938	6.02571	5.81921	5.77829	5.39633	5.967	4.44044	0	8294.2	-9.03976	-17.1026	-124.008	27.3836	12.8131													8256.13	-8.97185	-16.9769	-123.471	28.3966	12.3448	6.512	931.562	65.225	3.414	275.104	6.618	63.095	6.415	282.448	6.975	60.74	7.845
2021-01-29 23:00:00		70.0183	70.2333	73.845	73.4725	73.5204	6.33988	6.12471	6.05337	5.75404	6.33212	4.54924	0	8294.6	-9.04455	-17.1175	-124.301	30.5437	12.6387													8240.06	-8.99402	-17.0177	-123.831	27.9128	12.3103	6.905	931.667	62.697	2.637	271.33	7.213	59.662	4.934	270.413	7.312	58.943	6.346
2021-01-30		69.1308	69.1117	72.055	71.3942	72.0012	6.57617	6.38363	6.48425	6.22829	6.69658	4.9116	0	8286.81	-9.05276	-17.1312	-124.561	29.6464	12.4888													8221.37	-9.02494	-17.074	-124.295	26.9639	12.2971	6.998	931.804	62.193	4.492	296.047	6.95	60.687	8.662	287.673	7.105	59.357	9.959
2021-01-30 01:00:00		70.1558	70.0938	72.9479	72.3121	73.0267	6.22042	6.04033	6.13063	5.86062	6.32967	4.59608	0	8275.39	-9.0625	-17.1445	-124.806	26.9421	12.3499													8142.48	-9.07566	-17.1654	-125.035	24.8855	12.2878	6.65	931.666	63.348	5.769	318.19	6.5	62.355	10.125	310.75	6.477	62.055	12.486
2021-01-30 02:00:00	-0.145855	71.5683	71.6388	74.6942	74.0396	74.4737	5.66992	5.46071	5.50913	5.23829	5.77625	3.96636	0	8198.31	-9.10163	-17.2152	-125.476	25.4327	12.2454													8009.15	-9.14428	-17.2885	-126.026	21.7858	12.2821	6.132	930.508	64.572	4.122	307.286	6.337	61.76	7.815	307.296	6.57	59.513	10.181
2021-01-30 03:00:00	-0.184318	69.38	69.5292	73.0542	72.6667	72.535	5.57279	5.34625	5.30075	4.97229	5.63488	3.9277	0	8003.85	-9.19332	-17.3886	-126.907	26.0601	12.2021													7867.24	-9.21891	-17.4249	-127.107	19.768	12.2929	6.137	929.501	61.822	4.125	303.003	6.647	55.74	8.028	306.848	7.573	44.19	9.717
2021-01-30 04:00:00	-0.384985	71.5171	72.0392	75.6708	75.8229	76.3571	4.98763	4.68308	4.53575	4.11617	4.71533	3.24271	0	7803.72	-9.28944	-17.5703	-128.376	26.6822	12.186													7689.25	-9.31884	-17.6173	-128.565	22.3017	12.3731	5.522	929.21	63.745	4.161	286.24	5.84	60.592	6.952	290.582	6.373	54.892	6.659
2021-01-30 05:00:00	-0.140027	66.1038	66.2013	69.5637	69.0938	69.3246	5.55046	5.34288	5.41613	5.13204	5.69633	4.21067	0	7387.07	-9.55446	-18.0687	-131.341	27.1045	13.2081													7511.26	-9.41876	-17.8097	-130.024	24.8355	12.4533	6.002	928.321	58.48	2.126	331.934	6.553	52.338	5.011	300.372	7.163	44.16	6.532
2021-01-30 06:00:00	0.469903	57.4312	57.4683	61.1908	60.8242	61.0192	6.33896	6.08563	6.04425	5.76075	6.30604	4.5585	0	6970.42	-9.81949	-18.5671	-134.306	27.5267	14.2302													7120.21	-9.68077	-18.298	-133.552	22.9163	12.8315	6.838	927.744	49.725	3.988	296.935	7.275	45.21	6.912	301.669	7.62	40.023	7.829
2021-01-30 07:00:00	89.3894	57.8458	57.7088	61.7075	62.0079	63.3667	6.18296	6.03729	5.76462	5.419	5.90429	4.30739	0	7029.8	-9.89082	-18.7019	-134.653	28.0035	14.9617													6694.24	-9.96934	-18.8348	-137.42	20.2671	13.2585	6.155	927.283	52.552	4.323	285.416	6.198	49.695	7.187	287.183	6.49	45.535	8.312
2021-01-30 08:00:00	96.7113	62.0267	61.4371	64.2046	63.5138	64.3179	6.22008	6.17621	6.44	6.25104	6.8815	5.95113	0	7300.45	-9.87618	-18.6753	-133.838	28.5044	15.5641													6683.45	-10.0376	-18.9651	-138.123	21.4128	13.5972	6.155	925.976	56.68	2.048	42.875	5.543	56.883	3.098	34.069	5.802	50.978	3.24
2021-01-30 09:00:00	121.491	60.2912	59.3042	60.5562	59.8725	60.865	7.20217	7.322	7.97525	7.79029	8.2485	7.47412	0	7458.63	-9.8769	-18.6758	-133.376	28.0189	16.0299													7046.78	-9.9073	-18.729	-135.976	25.978	13.8565	7.03	925.896	55.295	1.344	47.672	6.382	55.027	1.414	32.447	6.713	48.463	1.609
2021-01-30 10:00:00	135.744	58.6392	57.7263	58.4017	57.4846	58.2912	7.18821	7.25083	8.21692	8.04054	8.5625	7.95186	0	7416.06	-9.90504	-18.7244	-133.544	25.7732	16.2516													7276.79	-9.85401	-18.6358	-134.953	29.6476	14.1333	7.118	925.457	53.632	1.3	118.411	6.438	53.547	1.352	96.008	6.652	46.053	1.523
2021-01-30 11:00:00	116.478	52.6375	51.8642	53.2221	52.1983	52.5171	8.08208	8.10025	8.94625	8.7675	9.45125	8.82856	0	7400.58	-9.92267	-18.7535	-133.625	23.6421	16.4038													6946.91	-10.1242	-19.1426	-138.658	29.5562	14.4834	7.977	925.291	47.703	1.242	104.614	7.32	47.487	1.326	99.684	7.157	45.005	2.008
2021-01-30 12:00:00	144.519	49.6825	48.9771	50.3833	49.4546	50.1921	9.06833	9.08792	9.90708	9.72292	10.4096	9.56657	0	8420.21	-9.53865	-18.0364	-130.389	25.8941	13.9025													6617.02	-10.3943	-19.6494	-142.362	29.4648	14.8336	9.1	924.883	44.555	1.094	54.96	8.328	44.898	1.204	64.876	8.03	44.525	1.614
2021-01-30 13:00:00	44.4151	75.0092	75.6654	75.1167	77.1175	77.6817	7.02829	7.05404	7.84837	7.63087	8.20754	7.70976	2.0509	9439.83	-9.15463	-17.3193	-127.154	28.1461	11.4012													8386.38	-10.3176	-19.5145	-140.979	34.3402	15.1373	7.618	924.085	71.813	1.329	71.606	6.785	67.162	1.406	76.386	6.705	65.482	1.292
2021-01-30 14:00:00	37.2496	98.1042	97.9292	98.8542	99.2208	99.5125	5.11554	5.09687	5.50854	5.40471	5.87192	5.71213	2.61024	10415.4	-9.79264	-18.5263	-136.869	33.5128	11.3408													10500.2	-10.1839	-19.2742	-138.76	40.0306	15.4335		922.307	99.9	2.222	286.116	5.055	98.13	3.437	286.722	5.392	99.39	3.731
2021-01-30 15:00:00	9.05188	99.9167	99.4125	100	100	100	5.25204	5.16983	5.5415	5.43283	5.90275	5.62986	2.0509	11371.5	-10.8835	-20.5857	-152.324	40.2595	12.3619													11442.9	-10.8997	-20.6199	-150.087	42.5497	14.8717		920.49	99.9	2.852	286.525	5.268	99.203	4.85	286.556		99.9	5.992
2021-01-30 16:00:00	0.698783	99.9583	99.7583	100	100	100	4.98125	4.86467	5.18687	5.04921	5.53342	5.20451	2.23735	11808.1	-11.7995	-22.3099	-165.881	43.5987	12.5983													11329.9	-12.3812	-23.3951	-173.624	42.2101	13.5367	5.725	919.463	99.623	1.665	294.732	5.11	97.94	3.332	299.064	5.35	99.195	4.116
2021-01-30 17:00:00	-0.399917	94.2375	94.1125	99.6125	97.7083	98.2708	5.04113	4.91417	4.97217	4.89217	5.37471	4.77039	0.372891	11317.7	-12.4033	-23.4359	-176.053	40.8577	11.4347													11164.8	-13.481	-25.4544	-191.398	41.2569	12.237	5.548	918.708	89.522	2.787	290.024	5.377	84.808	5.258	290.636	5.292	85.655	7.171
2021-01-30 18:00:00	-0.312933	92.0292	92.3333	99.2417	95.9417	97.175	5.0985	4.89967	4.83975	4.81008	5.26513	4.53979	0	10837.5	-12.9695	-24.4915	-185.64	38.1895	10.2923													10780.4	-12.9781	-24.5064	-184.966	37.7264	11.0855	5.537	918.473	87.358	4.898	302.488	5.457	82.475	9.473	301.203	5.538	80.978	11.403
2021-01-30 19:00:00	-0.147554	88.2833	88.8833	98.0583	93.0958	94.35	5.65896	5.41017	5.159	5.20846	5.64717	4.66771	0	10736	-12.1234	-22.9066	-173.31	38.252	9.94253													10396.1	-12.4751	-23.5584	-178.533	34.1959	9.9339	6.072	918.265	82.607	3.898	311.713	5.998	78.895	7.562	306.865	6.02	78.105	10.309
2021-01-30 20:00:00	-0.231503	84.4833	84.9917	91.2375	88.9042	89.6708	6.22708	5.98787	5.87829	5.81196	6.30504	4.99707	0	10634.5	-11.2774	-21.3216	-160.98	38.3145	9.59276													10232.9	-11.5827	-21.8873	-165.224	35.0677	9.87456	6.612	918.225	78.485	3.502	305.335	6.465	75.817	6.572	305.814	6.417	75.5	8.563
2021-01-30 21:00:00	-0.069427	83.1458	83.5167	87.8375	87.0625	87.2792	6.29938	6.07258	6.10729	5.91704	6.47208	5.05517	0	10459.8	-10.8114	-20.4484	-153.611	38.4225	9.97651													10105.8	-10.6265	-20.0977	-150.787	36.6612	9.99425	6.655	917.893	77.407	4.059	303.721	6.473	75.28	7.842	303.024	6.41	75.182	10.272
2021-01-30 22:00:00		82.08	82.4013	86.5917	86.0833	86.05	6.30246	6.08142	6.10275	5.87946	6.46904	4.99304	0	10252.6	-10.5141	-19.891	-148.442	38.5505	10.6857													9945.48	-10.1459	-19.1991	-143.232	37.9221	10.3604	6.698	917.397	75.82	4.916	296.037	6.513	73.928	9.266	295.778	6.42	74.018	11.389
2021-01-30 23:00:00		80.6833	80.8183	84.4333	84.0833	84.2458	6.31192	6.12025	6.21496	5.96138	6.52925	5.02729	0	10031.6	-10.2917	-19.4743	-144.647	38.7923	11.1472													9755.08	-10.0937	-19.1029	-141.875	38.8836	10.9485	6.682	916.912	74.373	5.562	298.241	6.465	72.812	10.528	298.473	6.322	73.343	13.285
2021-01-31		80.0675	80.2892	83.9333	83.5417	83.6792	5.99212	5.77071	5.83358	5.57737	6.16237	4.54581	0	9785.63	-10.2028	-19.3083	-143.3	39.2369	11.1668													9561.16	-10.0496	-19.0221	-140.739	39.9221	11.4382	6.365	916.722	73.688	6.144	299.828	6.19	72.058	11.696	300.573	6.077	72.548	14.371
2021-01-31 01:00:00		81.545	81.7537	85.3958	85.0125	85.1958	5.52867	5.29838	5.32654	5.07146	5.64746	4.05246	0	9541.48	-10.1166	-19.1472	-141.988	39.6397	11.1895													9352.54	-10.0397	-19.0059	-140.532	41.2829	11.5157	5.893	917.052	75.488	5.361	301.553	5.752	73.803	10.191	302.515	5.692	74.133	12.708
2021-01-31 02:00:00	-0.04173	79.35	79.5346	83.075	82.7625	83.0833	5.65446	5.44233	5.50646	5.21608	5.79158	4.15674	0	9362.91	-10.1259	-19.1625	-141.971	38.4998	11.3287													9143.92	-10.0297	-18.9897	-140.325	42.6437	11.5932	6.023	917.107	72.845	5.274	294.884	5.838	71.382	9.577	296.204	5.732	71.732	12.112
2021-01-31 03:00:00	-0.191298	80.3946	80.6538	84.3167	84.0417	84.275	5.12908	4.91108	4.90613	4.61988	5.22817	3.5834	0	9184.35	-10.1351	-19.1778	-141.955	37.3599	11.4679													9042.69	-10.0428	-19.0111	-140.467	40.8935	11.6214	5.55	917.097	73.935	5.455	308.072	5.39	72.44	10.155	304	5.293	72.867	12.56
2021-01-31 04:00:00	-0.216188	81.4458	81.6292	85.0708	84.5792	84.825	4.92917	4.7185	4.76429	4.50413	5.10804	3.56588	0	9105.17	-10.1506	-19.2043	-142.025	35.9404	11.6088													8958.99	-10.0597	-19.0386	-140.667	38.6357	11.6415	5.32	916.975	75.185	4.137	305.879	5.193	73.49	7.204	305.404	5.148	73.852	8.535
2021-01-31 05:00:00	-0.241272	82.5583	82.6917	85.925	85.5	85.8	4.62208	4.44096	4.502	4.21542	4.80642	3.32643	0	9070.02	-10.1689	-19.2356	-142.135	34.3969	11.7504													8922.17	-10.0846	-19.085	-140.979	38.4108	11.7002	5.033	916.788	76.497	5.83	301.921	5.005	74.378	10.241	304.122	4.995	74.583	12.198
2021-01-31 06:00:00	0.627065	81.9542	82.2167	85.6875	85.1125	85.6167	4.80742	4.60421	4.61242	4.34758	4.90821	3.29006	0	9078.01	-10.1732	-19.2447	-142.112	34.9368	11.8451													8927.56	-10.1167	-19.1482	-141.392	40.016	11.7936	5.212	916.703	75.77	5.678	301.24	5.252	73.157	10.028	304.703	5.24	73.257	12.027
2021-01-31 07:00:00	56.8704	80.2092	80.335	84.05	83.5917	83.9417	5.30254	5.17725	5.14729	4.85829	5.45208	3.87954	0	9162.81	-10.1526	-19.2139	-141.855	39.1867	11.8564													8943.06	-10.1632	-19.2379	-141.978	41.3634	11.925	5.528	916.649	74.778	5.794	308.89	5.258	73.642	10.852	309.1	5.158	74.297	12.784
2021-01-31 08:00:00	216.052	74.5062	73.7617	79.2108	79.035	79.1646	6.83387	6.898	6.55612	6.2405	6.81354	5.02105	0	9254.32	-10.1345	-19.1877	-141.611	43.2721	11.891													9000.81	-10.2694	-19.4377	-143.287	41.6331	12.2152	6.612	916.661	70.008	5.849	305.282	5.9	70.412	10.498	306.454	5.717	70.883	11.962
2021-01-31 09:00:00	338.214	67.1033	65.7075	69.9379	70.0933	70.2317	8.927	9.19375	9.16183	8.85308	9.37167	7.74072	0	9592.96	-10.211	-19.3276	-141.834	41.3003	12.7864													9058.55	-10.3757	-19.6376	-144.595	41.9029	12.5054	8.583	917.082	62.192	4.49	295.975	7.555	63.607	7.452	302.182	7.187	64.505	9.122
2021-01-31 10:00:00	432.403	61.9021	60.8612	63.5483	64.0487	63.6142	10.4238	10.585	10.9746	10.7217	11.2708	10.5422	0	9931.6	-10.2875	-19.4675	-142.058	39.3284	13.6818													9065.28	-10.5393	-19.9361	-146.593	37.34	12.8954	10.022	917.635	57.112	3.962	302.233	8.782	58.953	6.617	302.684	8.352	59.818	7.469
2021-01-31 11:00:00	472.959	56.3542	55.7263	58.3192	58.2983	57.7483	11.7546	11.8125	12.1658	12.0571	12.9992	13.0425	0	10086.1	-10.4112	-19.6995	-143.692	39.3254	13.9033													9063.66	-10.7123	-20.2506	-148.704	31.9874	13.3016	11.38	918.035	51.45	4.407	298.012	10.137	53.075	7.162	295.415	9.705	53.728	7.998
2021-01-31 12:00:00	454.483	52.9454	51.9029	54.2	54.1796	52.4675	12.7817	12.9021	13.375	13.2208	14.5229	14.2532	0	10158.8	-10.5558	-19.9723	-145.952	40.1955	13.8259													9156.49	-10.8557	-20.5176	-151.035	30.9506	13.1064	12.442	918.617	48.603	3.602	316.417	11.165	50.227	5.584	309.364	10.703	50.755	6.072
2021-01-31 13:00:00	388.111	54.8967	53.9312	55.2504	55.6633	53.5075	12.8004	12.8883	13.6225	13.2908	14.6404	13.6878	0	10205.8	-10.6635	-20.1721	-147.971	39.057	13.4056													9334.38	-10.9724	-20.7417	-153.564	33.8004	12.3694	12.44	919.001	50.703	3.929	289.25	11.245	52.162	6.152	293.34	10.862	52.428	6.767
2021-01-31 14:00:00	277.588	56.7104	56.1467	58.1858	58.0167	55.3979	12.3383	12.2621	12.6308	12.5042	13.865	12.8254	0	10206.8	-10.7053	-20.2419	-149.56	34.3423	12.3747													9451.22	-11.1405	-21.0591	-156.914	34.9243	11.5585	12.118	918.942	51.973	4.328	286.517	10.978	53.895	7.384	296.502	10.565	54.77	7.81
2021-01-31 15:00:00	150.138	57.4717	57.55	59.1971	59.2654	57.6613	11.6617	11.3808	11.8504	11.6329	12.6192	11.5042	0	10209.5	-10.7472	-20.3121	-151.165	29.7759	11.3312													9313.08	-11.5236	-21.7658	-163.688	28.8393	10.4381	11.555	918.608	52.335	5.052	289.024	10.663	53.597	8.499	285.936	10.283	54.343	9.22
2021-01-31 16:00:00	12.8139	64.7167	64.4938	67.2167	67.3158	66.6046	9.66083	9.53833	9.51292	9.26017	9.97625	8.30675	0	10277.3	-10.7914	-20.3964	-153.342	30.6313	9.82991													9174.95	-11.9067	-22.4726	-170.463	22.7543	9.31777	10.058	918.199	58.42	4.936	284.076	9.858	56.898	8.38	280.542	9.682	56.667	9.308
2021-01-31 17:00:00	-0.309263	79.9079	79.9296	82.2288	82.335	82.4825	7.44646	7.28275	7.23129	6.90779	7.43667	6.0413	0	10345.1	-10.8355	-20.4808	-155.518	31.4867	8.32859													9751.63	-11.4577	-21.6382	-164.2	26.6505	8.90562	8.127	918.429	74.09	3.695	271.819	8.235	70.743	6.201	274.296	8.538	66.668	6.578
2021-01-31 18:00:00	-0.354969	86.75	87.3667	90.5042	91.0792	91.9792	6.25583	5.94367	5.65792	5.17708	5.58521	4.06089	0	10330.2	-10.8376	-20.4844	-156.25	31.3095	7.62486													10444.6	-10.8735	-20.5531	-155.817	32.1701	8.60865	7.197	918.674	80.442	3.064	252.368	7.743	73.32	4.72	249.538	7.955	70.157	5.103
2021-01-31 19:00:00	-0.267355	84.1075	85.1375	89.9583	90.2667	90.9167	6.50558	6.11708	5.68375	5.24825	5.7025	3.83464	0	10278.7	-10.821	-20.4521	-156.343	30.6755	7.27387													10743.3	-10.6607	-20.1581	-153.134	34.2399	8.13072	7.375	918.921	76.89	2.881	246.847	7.905	70.858	3.96	246.218	7.913	70.343	3.757
2021-01-31 20:00:00	-0.162609	81.9217	82.2	86.0375	85.7875	86.4375	7.12967	6.884	6.737	6.46579	6.96521	5.17294	0	10331.6	-10.7776	-20.3705	-156.051	30.5893	6.91315													10687.7	-10.7818	-20.3833	-155.577	33.2091	7.49014	7.59	919.457	76.14	2.605	279.821	7.465	75.013	4.136	275.881	7.427	76.153	4.93
2021-01-31 21:00:00	0	84.6792	84.8875	87.85	87.775	88.0958	7.05112	6.83871	6.85242	6.60733	7.15883	5.74021	0	10569.8	-10.6863	-20.2011	-155.073	31.4769	6.53513													10697.9	-10.84	-20.492	-156.882	32.9725	7.05401	7.443	919.561	79.852	1.961	307.739	7.322	78.578	3.907	306.286	7.31	79.678	5.653
2021-01-31 22:00:00		88.7125	89.1292	91.85	92.2375	92.7083	6.31633	6.01008	5.84237	5.39371	5.88296	4.53039	0	10812.3	-10.5892	-20.0205	-154.016	32.3754	6.14788													10982.4	-10.6354	-20.114	-153.44	36.0519	7.4715	6.957	919.548	84.085	2.082	298.07	6.798	83.297	3.675	296.564	6.698	85.528	4.792
2021-01-31 23:00:00		91.6833	92.0292	94.8375	95.5458	96.0833	6.33179	6.10808	6.06517	5.71687	6.26692	5.08761	0.372891	11212	-10.2734	-19.4302	-150.021	33.6715	5.42098													11267	-10.4309	-19.736	-149.999	39.1313	7.889	6.82	919.416	90.323	2.121	267.871	6.76	86.808	2.544	268.197	6.708	89.35	3.002
2021-02-01		96.4208	97.1875	97.7458	99.1708	99.4542	5.96892	5.67558	5.67042	5.34513	5.81792	5.13495	0.372891	11611.7	-9.95754	-18.84	-146.026	34.9676	4.69408													11601.9	-10.1881	-19.2833	-146.274	40.6126	7.99194	6.515	919.223	99.74	2.209	273.186	6.237	93.173	3.584	264.507	6.148	98.433	4.358
2021-02-01 01:00:00		99.3083	99.325	99.75	100	100	5.59496	5.47154	5.64687	5.42846	5.99417	5.43311	2.79668	11825.9	-9.89329	-18.7243	-144.589	37.5846	5.20574													11945.1	-9.9392	-18.8183	-142.503	41.8333	8.04359		919.332	99.9	1.071	307.967	5.935	97.133	1.632	294.426	6.33	98.653	2.718
2021-02-01 02:00:00	-0.123727	100	100	100	100	100	5.40204	5.29254	5.48112	5.28358	5.86504	5.41206	0.932227	11958.1	-9.9403	-18.8185	-144.283	40.7857	6.26512													12071.8	-9.86832	-18.6895	-141.588	44.0735	7.92836		918.985	99.9	1.083	280.706	5.845	99.153	1.67	329.15		99.9	1.938
2021-02-01 03:00:00	-0.225481	100	100	100	100	100	4.99113	4.92025	5.18313	4.97637	5.62267	5.21507	0.932227	12018.9	-9.98238	-18.9013	-144.22	42.8159	6.99031													12004	-9.95742	-18.8626	-143.238	47.2295	7.66319		918.591	99.9	1.128	258.518	5.927	99.66	1.832	258.125		99.9	1.932
2021-02-01 04:00:00	-0.260487	100	100	100	100	100	4.67558	4.6015	4.88979	4.72646	5.34917	5.02829	0	11952.8	-10.0157	-18.9637	-144.588	42.7653	7.12169													11971.7	-10.0112	-18.9668	-144.308	48.9659	7.42691		918.089	99.9	0.791	70.133		99.9	0.634	133.843		99.9	1.222
2021-02-01 05:00:00	-0.072802	100	100	100	100	100	4.888	4.79779	5.08104	4.92746	5.55933	5.2761	0.186445	11890.9	-10.0454	-19.0194	-144.91	42.7052	7.24575													12087.2	-9.91803	-18.7841	-142.962	44.7853	7.31104		917.8	99.9	0.614	51.968		99.9	0.841	25.812		99.9	0.93
2021-02-01 06:00:00	0.516007	100	100	100	100	100	4.80892	4.72513	5.04962	4.89292	5.51383	5.19135	0.186445	11984.7	-9.94695	-18.8338	-143.563	42.3002	7.10697													12202.8	-9.82483	-18.6014	-141.616	40.6046	7.19517		917.53	99.9	0.429	105.447		99.9	0.847	279.435		99.9	2.71
2021-02-01 07:00:00	38.11	100	100	100	100	100	5.32275	5.22229	5.40646	5.23358	5.87567	5.49306	0	12078.4	-9.84846	-18.6482	-142.217	41.8951	6.9682													12351.5	-9.73191	-18.4224	-140.032	38.1357	7.34713		917.58	99.9	0.612	67.274		99.9	1.068	257.608		99.9	2.866
2021-02-01 08:00:00	104.23	100	100	100	100	100	5.92713	5.92312	6.32358	6.15983	6.78392	6.42593	0	12605.4	-9.66212	-18.297	-139.131	41.1837	7.24469													12505.6	-9.63905	-18.2439	-138.409	35.9445	7.54256		917.858	99.9	0.726	206.17		99.9	1.848	265.837		99.9	2.769
2021-02-01 09:00:00	177.879	99.9917	99.9625	100	100	100	7.31408	7.338	7.97796	7.65	8.21458	7.92001	0	13323.6	-9.43698	-17.8727	-135.277	40.3371	7.70462													12668.8	-9.66777	-18.2956	-138.734	34.7252	7.63031	7.811	918.013	99.673	0.698	237.389	6.917	98.9	1.497	266.266		99.9	2.41
2021-02-01 10:00:00	181.144	96	95.5458	99.9958	98.9417	98.5542	8.19221	8.21771	8.64	8.58083	9.0075	8.84504	0	13768.2	-9.43624	-17.87	-134.87	39.667	8.0905													12840.4	-9.80567	-18.5538	-140.809	34.3786	7.62137	8.27	918.565	94.82	1.261	267.847	7.475	93.557	1.863	272.362	7.181	96.89	2.23
2021-02-01 11:00:00	221.796	93.3292	92.9125	98.8917	95.7	95.4958	8.39958	8.46596	8.87	8.98583	9.35375	9.16831	0.186445	13726.5	-9.83405	-18.6161	-140.584	39.3104	8.34485													12889.8	-10.1198	-19.1442	-145.344	34.9965	7.80941	8.355	919.316	94.477	2.632	264.696	7.523	93.302	4.144	267.955	7.15	97.072	4.575
2021-02-01 12:00:00	263.58	85.7125	85.3583	89.1917	87.7208	87.2625	9.05333	9.14208	9.63583	9.66583	10.1375	9.91289	0	13671.2	-10.2456	-19.3881	-146.497	39.0139	8.60837													12429.8	-11.1688	-21.1195	-160.137	39.6371	8.81907	9.073	919.765	82.123	3.127	264.982	8.133	83.083	4.686	270.899	7.73	86.022	5.392
2021-02-01 13:00:00	317.826	80.4667	80.0342	81.8808	82.1283	80.7854	9.62542	9.73375	10.355	10.2017	10.9029	10.5857	0	13120.5	-11.1541	-21.0948	-159.556	40.8793	9.20237													11969.9	-12.2177	-23.0949	-174.93	44.2777	9.82874	9.527	920.177	75.82	4.471	279.862	8.512	77.367	7.707	283.929	8.103	79.792	9.408
2021-02-01 14:00:00	181.498	80.9354	80.5204	82.0308	82.2083	81.3225	9.43708	9.46833	9.98958	9.79417	10.4679	10.0726	0	12569.8	-12.0626	-22.8014	-172.615	42.7447	9.79638													11874.9	-12.7558	-24.1029	-182.896	44.4461	9.92677	9.512	920.297	76.055	4.98	285.797	8.648	77.293	8.497	285.483	8.268	79.553	9.664
2021-02-01 15:00:00	139.596	82.9333	82.6917	84.3	84.4375	83.5833	8.91667	8.8525	9.33917	9.14042	9.87458	9.38306	0	12229.4	-12.6082	-23.8245	-180.849	43.2798	9.74673													11839	-13.2112	-24.9542	-189.757	43.8907	9.87725	9.027	920.296	78.273	4.806	290.748	8.26	78.685	8.569	290.975	7.917	80.618	10.149
2021-02-01 16:00:00	13.504	85.7833	85.6625	88.0417	87.9458	88.0208	7.84604	7.76037	7.94675	7.76267	8.32458	7.37676	0	11981.8	-12.9937	-24.5462	-186.956	43.2281	9.41324													11848.7	-13.4134	-25.3341	-192.889	44.5727	9.78381	8.175	920.607	81.112	5.325	296.45	7.848	79.79	9.712	298.691	7.695	80.468	11.272
2021-02-01 17:00:00	-0.252807	90.6208	90.6	92.7667	92.7167	93.35	7.19342	7.10725	7.24263	7.05296	7.60146	6.62175	0	11902.5	-13.0899	-24.7257	-188.746	42.9822	9.05936													11899.2	-13.3885	-25.2908	-192.675	46.3653	9.65094	7.597	921.061	88.482	4.116	295.191	7.453	84.187	8.248	294.894	7.613	83.038	10.094
2021-02-01 18:00:00	-0.294065	92.9667	93.0375	95.775	95.4208	96.0542	7.02571	6.86808	6.91275	6.71404	7.24483	6.07627	0	12121.6	-12.6726	-23.9434	-182.878	42.3917	8.6693													11977.4	-13.2326	-25.0014	-190.695	47.6891	9.31696	7.455	921.873	92.897	3.83	310.763	7.442	87.203	8.019	304.83	7.645	88.665	10.566
2021-02-01 19:00:00	-0.197505	93.375	93.15	95.7667	95.2583	95.5292	7.36779	7.25192	7.38413	7.162	7.72817	6.54776	0	12332.8	-12.2527	-23.156	-176.989	41.7792	8.25892													12170.3	-12.533	-23.6902	-181.374	47.0648	8.14744	7.755	922.753	94.655	3.916	309.9	7.565	89.857	8.488	301.479	7.613	92.818	11.014
2021-02-01 20:00:00	-0.23888	91.7333	91.7917	95.2708	94.5542	94.8458	7.59725	7.40875	7.40325	7.18575	7.74012	6.28303	0	12263.5	-11.737	-22.187	-170.373	40.3839	7.12314													12363.3	-11.8334	-22.379	-172.054	46.4404	6.97792	8.005	923.393	91.593	4.387	306.105	8.012	85.72	9.047	300.601	8.052	86.815	11.482
2021-02-01 21:00:00	-0.224304	87.65	87.5833	90.7667	90.3833	90.2083	8.21438	8.05821	8.17583	7.87821	8.49083	7.06418	0	12194.2	-11.2213	-21.2179	-163.756	38.9886	5.98736													12337.2	-11.3709	-21.5034	-165.799	41.6714	6.22848	8.615	923.872	83.077	4.682	301.695	8.353	81.675	8.732	295.833	8.252	83.287	10.12
2021-02-01 22:00:00		91.4375	91.4667	94.3667	94.2417	94.1042	7.60733	7.41129	7.4865	7.21025	7.82062	6.56911	0	12161	-10.9599	-20.7263	-160.407	38.0507	5.4028													12275.6	-10.9469	-20.6984	-160.04	36.2309	5.54707	8.02	924.477	89.9	3.907	283.008	7.813	87.015	6.488	278.884	7.682	90.402	8.022
2021-02-01 23:00:00		91.3	91.2542	94.2833	93.7167	93.6583	7.60642	7.38996	7.50517	7.26333	7.86708	6.54337	0	12143.7	-10.8107	-20.4451	-158.499	37.3146	5.06129													12060.1	-10.9516	-20.7051	-160.321	35.1236	5.31989	8.002	925.157	89.6	2.7	277.978	7.802	86.805	4.603	273.311	7.68	90.422	5.208
2021-02-02		88.4458	88.5542	92.1458	91.35	91.5708	7.59554	7.34863	7.40692	7.18104	7.71617		0	11984.8	-10.9153	-20.6411	-160.138	37.3037	4.99036													11706.6	-11.3406	-21.4396	-166.017	37.9011	5.49993	8.005	925.84	84.055	4.195	295.052	8.05	80.123	7.946	296.669	8.073	80.083	9.476
2021-02-02 01:00:00		85.9625	86.1583	89.8417	89.0542	89.3208	7.66113	7.40029	7.41446	7.15838	7.71129		0	11575.1	-11.4698	-21.6829	-168.064	38.5783	5.399													11379.4	-11.704	-22.1241	-171.391	39.688	5.60184	8.075	926.577	80.25	4.999	316.238	8.103	77.487	9.382	315.794	8.117	77.51	11.094
2021-02-02 02:00:00	-0.081091	82.4458	82.7292	86.5958	86.0333	86.1	7.88383	7.60308	7.55008	7.23463	7.85746		0	11177.2	-12.0063	-22.6908	-175.745	39.7713	5.7819													11160.7	-11.9608	-22.6011	-175.429	37.3674	5.37975	8.358	926.821	75.555	4.819	320.431	8.323	73.332	8.876	316.553	8.315	73.17	10.565
2021-02-02 03:00:00	-0.28891	86.3458	87.2042	91.9583	92.8667	93.0875	7.15654	6.72021	6.22171	5.56862	6.02321		0	11196.8	-11.9035	-22.495	-174.709	38.0633	5.25103													10942.1	-12.2177	-23.078	-179.467	35.0469	5.15767	7.745	927.204	80.287	3.453	295.415	7.838	77.765	6.276	303.301	7.715	79.058	8.196
2021-02-02 04:00:00	-0.326324	89.4417	89.9	93.9667	93.9625	93.9	7.00696	6.6735	6.47133	6.03958	6.67396		0	11216.4	-11.8006	-22.2991	-173.673	36.3553	4.72016													10993.4	-12.0585	-22.7797	-177.305	35.0412	4.93304	7.697	927.648	83.847	2.365	249.486	7.643	81.797	3.52	258.743	7.537	83.692	4.238
2021-02-02 05:00:00	-0.334189	87.5167	88.3708	93.45	93.6417	93.6042	7.14487	6.73521	6.36321	5.83596	6.43342		0	11052.9	-11.7312	-22.1671	-172.766	35.345	4.57063													11088.5	-11.8319	-22.356	-174.14	35.4102	4.708	7.832	928.003	80.87	3.604	266.602	8.15	76.238	5.186	271.242	8.155	75.923	6.195
2021-02-02 06:00:00	1.25864	85.7167	86.7708	92.4792	92.8583	92.8208	7.19896	6.74479	6.2755	5.69275	6.31712		0	10808.6	-11.6764	-22.0632	-171.916	34.6421	4.58912													11012	-11.7293	-22.1642	-172.498	35.629	4.81551	7.92	928.395	78.328	2.853	270.492	8.27	73.795	3.992	272.303	8.397	72.498	4.111
2021-02-02 07:00:00	73.0071	78.55	79.2154	86.0458	85.1708	85.3504	8.55012	8.26538	7.70025	7.39896	7.98225		0	10813.9	-11.599	-21.9198	-170.113	35.5489	5.24477													10782.2	-11.7377	-22.18	-172.219	35.7134	5.22054	8.71	929.102	72.58	2.829	309.561	8.86	68.787	4.246	311.794	9.173	66.308	5.145
2021-02-02 08:00:00	179.546	72.1996	71.4242	78.0504	77.4158	77.6154	10.2983	10.3362	9.95375	9.675	10.2529		0	11260.5	-11.4815	-21.7065	-166.626	39.3011	7.02677													10656.4	-11.6964	-22.1034	-171.012	36.1104	5.81465	10.01	929.707	67.622	2.803	315.414	9.308	68.022	6.026	317.083	9.207	68.105	7.633
2021-02-02 09:00:00	169.679	71.2017	70.6408	74.5946	74.255	73.6608	11.1421	11.0379	11.375	11.1137	11.6967		0	11707.2	-11.3561	-21.4781	-163.054	42.9313	8.77093													10961.8	-11.45	-21.6446	-165.965	37.8012	7.19143	11.043	930.215	65.675	2.263	303.264	10.273	66.408	3.798	296.509	10.015	67.012	5.088
2021-02-02 10:00:00	224.556	70.0196	69.2442	71.7313	71.7408	71.4925	11.7954	11.7833	12.4125	12.2125	12.7392		0	12160.1	-10.9514	-20.7181	-156.551	42.3065	9.19433													11267.1	-11.2036	-21.1858	-160.918	39.4919	8.56821	11.635	930.866	65.327	1.677	293.078	10.807	66.388	3.039	295.551	10.452	67.37	4.245
2021-02-02 11:00:00	418.539	67.0783	66.4217	68.4821	68.5442	67.3842	13.165	13.1167	13.7867	13.62	14.3817		0	12613	-10.5468	-19.9582	-150.048	41.6816	9.61772													11610	-10.6924	-20.2241	-152.503	38.026	9.29016	12.658	931.6	63.177	2.43	259.314	11.513	65.133	3.704	267.161	11.097	66.505	4.071
2021-02-02 12:00:00	383.866	63.5679	62.5792	64.4667	64.4054	62.63	14.3454	14.3479	15.0404	14.7863	15.7917	14.7658	0	12924.8	-10.1664	-19.2421	-144.021	40.5461	9.91653													11959	-10.1385	-19.1814	-143.545	36.0518	9.90665	13.78	931.868	59.747	3.484	276.885	12.563	62.13	5.319	279.459	12.17	63.562	5.911
2021-02-02 13:00:00	282.358	66.9054	65.8	66.51	66.7571	65.5558	13.9087	13.9721	14.885	14.5954	15.3642	14.5702	0	13174.6	-9.79647	-18.5454	-138.203	39.1861	10.1606													12354.8	-9.81747	-18.5818	-138.745	37.4833	9.90873	13.563	932.016	62.995	3.62	277.877	12.465	65.222	5.806	278.025	12.117	66.595	6.206
2021-02-02 14:00:00	192.384	70.2925	69.7938	71.8858	71.5637	69.4058	13.4317	13.2871	13.825	13.6233	14.7029	13.5663	0	13304.4	-9.53219	-18.0462	-134.311	37.482	10.0588													12792.5	-9.70446	-18.3779	-137.662	41.9575	9.36189	13.038	931.851	67.02	3.702	261.51	12.078	69.105	5.358	260.859	11.805	70.148	5.775
2021-02-02 15:00:00	67.032	75.7283	75.5229	77.3542	77.0413	76.1467	12.0367	11.7963	12.2942	12.0125	12.805	11.6858	0	13221.9	-9.45484	-17.8966	-133.828	35.1689	9.34502																			12.022	931.509	71.61	3.633	242.767	11.517	71.703	5.181	246.169	11.425	72.005	5.494
2021-02-02 16:00:00	15.0812	80.615	80.3333	82.4392	82.1625	82.0292	10.7963	10.6208	10.9792	10.7233	11.2771	10.0412	0																									11.145	931.155	75.893	4.084	269.416	11.065	73.855	5.762	272.862	11.198	73.073	6.276
2021-02-02 17:00:00	-0.346112	84.6208	84.7	87.4167	86.9625	87.0917	9.87042	9.65083	9.81417	9.59583	10.0913	8.69827	0																									10.36	931.323	80.028	4.373	263.946	10.805	75.108	6.215	263.706	11.005	73.718	6.358
2021-02-02 18:00:00	-0.496122	83.3375	83.3667	86.2708	85.8125	85.9458	10.1133	9.87042	10.0696	9.82667	10.3	8.9047	0																									10.552	931.577	78.412	3.946	280.657	11.018	73.163	6.243	281.266	11.242	71.778	7.048
2021-02-02 19:00:00	-0.393598	84.0208	84.1667	87.3583	86.9292	87.1625	9.88417	9.60208	9.66833	9.41333	9.90125	8.26606	0																									10.405	932.09	78.675	3.625	289.823	10.82	74.05	6.052	282.475	11.138	72.212	6.817
2021-02-02 20:00:00	-0.406663	86.5792	87.1708	90.7083	90.8917	91.5417	9.10792	8.70625	8.49283	8.11296	8.35079	6.52791	0																									9.767	932.591	81.273	3.149	283.782	10.37	75.735	4.832	286.222	10.487	75.673	5.041
2021-02-02 21:00:00	-0.363159	87.0083	89.2417	94.45	96.5875	98.1708	8.99958	8.25958	7.50242	6.67583	6.74696	5.15728	0																									9.82	933.116	80.697	1.845	338.888	9.78	78.775	3.037	326.865	9.808	80.098	3.299
2021-02-02 22:00:00		91.9583	92.6833	96.2	97.5833	99.0125	7.98633	7.56308	7.24046	6.63358	6.65146	5.28709	0																									8.577	933.022	92.58	1.267	332.242	8.93	85.093	1.676	287.78	9.513	83.09	2.064
2021-02-02 23:00:00		93.9	95.1458	98.9417	99.6625	99.975	7.54646	6.999	6.52921	5.92133	6.00779	4.41817	0																									8.535	933.163	92.473	1.792	22.11	8.763	86.435	1.831	43.116	8.752	89.805	1.023
2021-02-03		92.2375	93.1542	98.3	98.9208	100	8.04696	7.60721	7.32463	6.77767	6.823	5.44357	0																									8.615	933.228	91.36	1.726	310.241	8.778	85.857	1.486	357.252	8.925	89.023	1.258
2021-02-03 01:00:00		95.7833	96.2042	98.775	99.1833	100	7.18454	6.75638	6.47879	5.85954	5.62067	4.46825	0																									7.958	933.197	99.407	1.754	41.72	7.768	92.737	2.81	37.834	7.975	97.157	2.997
2021-02-03 02:00:00	-0.099802	97.3917	97.5042	100	100	100	7.05417	6.72883	6.55483	6.19429	5.79854	4.13113	0																										933.562	99.9	1.791	57.189	7.898	93.877	2.879	60.84	7.978	99.358	3.444
2021-02-03 03:00:00	-0.259058	96.975	98.1792	100	100	100	6.99683	6.36396	5.70929	4.95742	4.55117	3.10249	0																									7.815	933.375	98.38	2.422	38.566	8.068	89.748	4.325	55.719	8.045	96.96	4.703
2021-02-03 04:00:00	-0.153556	94.4167	95.7542	100	100	100	7.45496	6.95862	6.36858	5.80058	5.23313	3.30631	0																									8.09	933.05	93.17	1.535	51.943	8.53	86.5	2.844	64.79	8.432	93.968	3.305
2021-02-03 05:00:00	-0.016178	92.5083	93.25	99.2083	99.1125	100	8.13004	7.77554	7.50642	7.13221	6.77596	5.63179	0																									8.483	932.306	91.123	2.186	32.651	8.628	85.79	4.1	54.042	8.458	90.815	3.871
2021-02-03 06:00:00	0.970669	93.9833	93.9708	97.7083	97.7	100	8.1025	7.85042	7.98675	7.64458	7.47792	6.70388	0																									8.342	932.199	96.873	2.134	48.939	8.22	91.877	4.019	57.516	8.367	97.902	4.295
2021-02-03 07:00:00	50.5318	93.3833	93.3792	97.7042	97.4875	100	8.37792	8.19083	8.06379	7.76033	7.71883	6.60073	0																									8.423	932.037	98.12	2.544	53.742	7.992	93.22	4.422	62.819	7.893	99.882	4.638
2021-02-03 08:00:00	166.649	88.0958	87.5167	92.8542	91.75	95.7792	9.50125	9.50167	9.47	9.32958	9.39792	8.09289	0																									9.222	932.036	88.447	2.705	67.274	8.48	88.162	4.174	73.239	8.308	92.848	4.607
2021-02-03 09:00:00	125.721	84.9292	84.3042	86.3667	85.4833	86.675	9.98458	10.025	10.7379	10.5358	11.02	9.94204	0																									9.872	932.246	82.68	2.919	86.069	9.048	84.525	4.09	86.006	8.717	88.982	4.786
2021-02-03 10:00:00	154.989	84.275	83.6375	84.4333	83.7667	83.5667	10.3138	10.3179	11.2571	11.09	11.7538	11.0422	0																									10.218	932.651	81.518	3.048	90.601	9.323	83.768	4.22	96.211	9.008	87.883	4.526
2021-02-03 11:00:00	148.189	83.1958	82.5917	83.0792	82.3	82.15	10.8212	10.7667	11.7387	11.5525	12.2358	11.5683	0																									10.792	933.204	79.81	3.245	100.388	9.86	82.227	4.438	101.913	9.517	86.185	4.926
2021-02-03 12:00:00	195.07	81.8908	81.1629	81.1621	80.1675	80.4638	11.3517	11.3467	12.4196	12.2496	12.78	12.1798	0																									11.2	933.454	78.892	3.252	104.434	10.27	81.318	4.708	105.815	9.91	85.17	5.374
2021-02-03 13:00:00	208.246	78.6088	77.6963	77.7625	76.9146	77.2496	11.825	11.8375	12.9688	12.7879	13.2462	12.5734	0																									11.557	933.198	75.487	3.363	122.649	10.618	77.857	4.661	124.228	10.278	80.78	5.05
2021-02-03 14:00:00	193.716	78.7758	77.6833	77.8179	76.8717	77.8558	11.9104	11.9612	12.9546	12.8021	13.1933	12.5571	0																									11.445	932.789	76.932	3.47	146.92	10.475	79.733	4.752	149.547	10.23	82.595	5.101
2021-02-03 15:00:00	169.476	79.9183	80.4033	79.3304	79.1262	78.8821	12.0017	11.6554	12.7804	12.4637	13.2063	12.431	0																									11.397	932.156	79.1	2.495	171.076	10.52	81.812	3.547	167.96	10.265	85.385	3.815
2021-02-03 16:00:00	21.2769	87.6333	87.7625	88.875	90.0292	87.8667	10.0062	9.74708	9.68875	9.28408	10.3475	9.06862	0																									10.247	932.014	86.863	2.316	156.122	9.78	86.572	3.001	158.267	9.568	90.842	3.017
2021-02-03 17:00:00	-0.201866	94.6292	95.7417	96.7042	98.15	98.3	8.41417	7.82325	7.33583	6.79858	7.003	5.64475	0	12642.7	-7.67112	-14.528	-111.273	26.3219	4.95051													13559.4	-7.45932	-14.1311	-105.366	27.2127	7.68255	9.305	932.18	96.25	1.425	168.447	9.292	87.83	2.413	160.785	9.193	90.45	2.201
2021-02-03 18:00:00	-0.344909	96.25	96.6625	99.875	99.9625	100	7.92158	7.58654	7.28596	6.90108	7.26738	5.20105	0	12774.5	-7.69539	-14.5744	-110.938	26.741	5.65737													13564.1	-7.39717	-14.0139	-104.492	26.984	7.61913	8.817	932.271	98.213	1.423	282.428	9.532	85.75	1.757	216.886	9.707	87.243	1.583
2021-02-03 19:00:00	-0.095171	93.7458	94.05	98.0292	97.5375	98.2833	8.44696	8.20671	8.10742	7.88296	8.31908	6.61763	0	12906.3	-7.71967	-14.6209	-110.603	27.1601	6.36423													13467.8	-7.51822	-14.2492	-106.585	31.0573	7.40861	8.955	932.717	95.168	2.599	295.54	9.778	84.743	3.912	287.616	10.013	86.288	4.152
2021-02-03 20:00:00	-0.112171	93.5083	93.6542	97.175	96.4292	97.2208	8.58125	8.37083	8.34125	8.12596	8.60708	6.82652	0	12619.8	-7.85051	-14.8634	-112.691	25.2708	6.21612													13371.5	-7.63926	-14.4845	-108.678	35.1306	7.19809	9.11	933.115	95.147	4.16	301.068	9.853	84.915	7.466	302.199	10.482	79.43	8.41
2021-02-03 21:00:00	0.086975	93.9875	94.6667	97.4875	97.5833	97.9208	8.08096	7.6885	7.40546	6.93575	7.22963	5.78167	0	12302.9	-7.98907	-15.1201	-114.955	23.2143	6.00606													13196.5	-7.73619	-14.6616	-110.176	32.346	7.11651	8.642	933.557	94.792	3.76	301.943	8.93	87.753	7.268	305.036	9.35	86.57	7.414
2021-02-03 22:00:00		93.6583	95.45	99.75	100	100	7.96296	7.38433	6.71679	6.07071	6.19392	4.24611	0	12124	-8.07824	-15.2877	-116.296	23.1639	6.00525													12997.4	-7.82574	-14.8209	-111.493	27.4636	7.07436	8.825	933.7	91.538	1.2	2.636	8.777	87.447	2.506	327.041	9.013	87.313	3.415
2021-02-03 23:00:00		92.525	93.4417	98.95	98.9417	99.6833	8.02104	7.63029	7.28617	6.81212	7.19733	5.19048	0	12037.3	-8.13434	-15.3956	-117.02	24.4568	6.14453													12688.4	-7.92511	-15.0037	-112.802	25.2465	7.22691	8.807	933.799	88.923	1.901	348.274	9.932	72.338	2.445	337.5	10.282	69.303	2.924
2021-02-04		87.0458	89.3417	96.75	98.3792	99.9167	8.37058	7.72708	7.03854	6.18333	6.18183	4.68108	0	11890.6	-8.21602	-15.5521	-118.067	26.0686	6.35009													12235	-8.03737	-15.2171	-114.102	26.5244	7.63477	9.22	934.077	80.29	2.538	314.08	9.41	75.098	2.771	318.389	9.872	70.585	1.931
2021-02-04 01:00:00		85.1167	87.7167	95.9917	97.9625	99.9667	8.28042	7.61813	6.80646	5.91217	5.95542	4.43049	0	11578.3	-8.36837	-15.8432	-120.007	28.5613	6.73872													11831.9	-8.1379	-15.4087	-115.247	27.8765	8.0223	9.145	934.017	77.372	1.336	347.376	9.317	71.54	2.178	328.494	10.192	63.898	4.198
2021-02-04 02:00:00	-0.031333	91.1875	92.1292	96.7917	98.3583	99.9625	7.65425	7.21379	6.828	6.12067	5.86475	4.69872	0	11265.9	-8.52073	-16.1342	-121.946	31.0539	7.12735													11885.7	-8.13189	-15.4011	-114.984	29.9024	8.22497	8.2	934.06	92.508	1.213	306.484	8.602	83.967	1.377	330.334	9.943	67.74	2.864
2021-02-04 03:00:00	-0.092656	85.1125	88.5542	96.7583	98.1292	100	8.58771	7.67475	6.92429	6.21579	6.00592	4.84543	0	11377.1	-8.52368	-16.1393	-121.686	30.8014	7.42863													11939.5	-8.12588	-15.3936	-114.721	31.9282	8.42765	9.405	934.159	78.493	1.78	34.984	9.702	72.867	2.432	49.73	10.657	60.298	1.91
2021-02-04 04:00:00	-0.053428	79.9171	82.9471	92.9333	94.7417	99.075	8.88875	8.10887	7.30921	6.47446	6.25783	5.06273	0	11518.7	-8.51588	-16.1238	-121.267	30.3511	7.7236													11292.6	-8.33187	-15.7792	-117.226	31.1109	9.00751	9.813	934.086	71.405	0.998	38.333	10.31	64.205	1.606	55.609	10.887	56.337	2.64
2021-02-04 05:00:00	-0.061454	72.5342	75.4196	85.8083	88.1458	93.5625	9.38833	8.56875	7.65733	6.71154	6.55179	5.07763	0	11451	-8.54439	-16.1771	-121.159	30.1996	8.25786													10431.6	-8.60264	-16.285	-120.577	29.4249	9.70262	10.383	933.635	62.735	0.825	299.027	10.938	55.385	1.326	41.892	11.447	51.427	2.33
2021-02-04 06:00:00	0.293954	73.4329	75.7375	83.7237	86.3583	91.375	8.99829	8.32375	7.57067	6.65796	6.49996	5.02928	0	11243.4	-8.59717	-16.2764	-121.259	30.2479	8.95199													10158.9	-8.71481	-16.4932	-122.113	27.9958	9.83266	9.487	933.385	67.938	1.098	263.672	10.885	54.147	0.828	334.345	11.402	49.637	1.58
2021-02-04 07:00:00	15.7458	79.8054	81.6454	88.0667	90.4125	94.0208	8.49242	7.89679	7.15621	6.49092	6.50654	5.15475	0	11242.6	-8.63107	-16.3406	-121.184	30.5515	9.54123													10656.9	-8.61915	-16.3114	-121.269	26.9037	9.22216	8.943	933.498	74.302	0.769	21.961	9.927	61.712	0.88	55.772	10.75	54.125	0.658
2021-02-04 08:00:00	39.8251	79.8525	81.5546	88.1792	90.5083	93.7	8.41279	7.98771	7.76658	7.29146	7.59271	6.49339	0	11811.7	-8.61291	-16.3084	-120.626	31.5592	9.84136													11148.3	-8.53394	-16.1495	-120.483	25.9685	8.71382	8.93	933.617	73.253	0.81	95.2	10.057	61.16	0.771	159.675	10.47	56.613	1.129
2021-02-04 09:00:00	90.5188	81.3954	82.0242	86.4375	87.1625	89.125	8.87471	8.70888	8.95083	8.69125	9.14583	7.92731	0	12380.7	-8.59475	-16.2761	-120.067	32.5669	10.1415													11578.7	-8.5433	-16.168	-120.215	26.454	9.12969	8.973	934.133	77.708	1.068	42.223	9.885	61.662	1.162	87.503	10.77	54.697	1.754
2021-02-04 10:00:00	173.837	81.5763	81.2567	83.1462	82.7496	82.9758	9.75875	9.75333	10.5767	10.3446	10.9683	9.97637	0	12431.6	-8.59646	-16.274	-120.076	29.6796	10.116													12009.2	-8.55265	-16.1865	-119.947	26.9395	9.54555	9.427	934.73	80.845	0.913	33.478	9.823	63.115	1.793	46.584	10.302	57.512	4.052
2021-02-04 11:00:00	225.201	80.5463	79.7829	79.8492	79.555	78.7862	9.565	9.63167	10.7317	10.5796	11.5046	10.866	0	12445.2	-8.5996	-16.274	-120.125	26.5118	10.067													11802.3	-8.68856	-16.4466	-121.818	29.4863	9.75538	9.162	935.007	78.81	1.497	78.553	8.377	77.51	2.902	68.319	9.27	64.227	4.827
2021-02-04 12:00:00	261.259	73.6508	72.9225	73.5296	72.8363	71.6142	10.4575	10.5483	11.4904	11.4663	12.6108	12.0824	0	12336.9	-8.66349	-16.3964	-120.659	27.8187	10.5126													11401	-8.86306	-16.7804	-124.341	32.6618	9.90237	10.105	935.414	70.31	2.392	84.166	9.147	71.305	3.044	77.102	9.135	67.348	4.971
2021-02-04 13:00:00	286.497	70.1183	69.5337	69.6446	69.2104	67.4096	11.7325	11.6771	12.7392	12.5262	13.6442	12.7996	0	12147.1	-8.76797	-16.6008	-121.518	32.1154	11.2886													11494.3	-8.79079	-16.6447	-123.408	32.7415	9.74877	11.252	935.4	66.263	2.744	71.443	10.25	68.023	3.503	70.105	10.025	67.248	4.262
2021-02-04 14:00:00	212.785	68.1279	67.8396	68.685	68.1513	65.6488	12.3238	12.1571	12.8954	12.7183	14.1163	12.9366	0	12268.6	-8.64952	-16.382	-119.877	34.2886	11.1789													12235.7	-8.39521	-15.8936	-117.948	28.7653	9.20136	11.945	935.039	64.425	2.598	95.931	11.095	66.242	3.179	96.693	10.74	67.937	3.356
2021-02-04 15:00:00	91.2665	88.2746	87.2833	85.5858	85.6708	86.8517	10.5408	10.5996	11.4842	11.4029	11.7608	11.0465	0	13248.2	-7.91648	-14.9968	-111.347	30.6079	8.62743													12952	-7.99514	-15.1359	-112.494	25.7788	8.59369	10.523	934.482	93.452	1.925	111.496	9.637	92.605	2.421	114.077	10.147	97.727	2.497
2021-02-04 16:00:00	6.12411	93.925	93.2208	92.6292	92.8	92.8917	9.1975	9.17042	9.77542	9.68083	10.2058	9.59717	0	14227.7	-7.18345	-13.6116	-102.817	26.9271	6.07597													13444.3	-7.5547	-14.3186	-107.104	31.6785	7.44501		934.162	99.9	3.382	153.011	8.767	97.333	4.876	150.986		99.9	5.293
2021-02-04 17:00:00	-0.369388	95.7167	95.0375	94.7375	95.0167	95.2542	8.80083	8.68917	9.24375	9.12	9.63833	9.02984	0	14214.1	-7.09634	-13.4513	-102.117	28.8102	5.49376													13936.5	-7.11427	-13.5013	-101.714	37.5782	6.29633		934.334	99.9	1.94	126.577	8.508	99.315	2.888	132.114		99.9	3.549
2021-02-04 18:00:00	-0.387058	97.9708	97.2	97.225	97.3042	97.4792	8.49833	8.38	8.91792	8.7725	9.30917	8.72837	0	14129.2	-7.05561	-13.3789	-101.978	31.0928	5.05298													14037.1	-6.94804	-13.1834	-99.9186	34.8045	5.54866		934.035	99.9	1.753	122.457		99.9	2.542	125.595		99.9	2.716
2021-02-04 19:00:00	-0.420539	99.1167	98.2208	98.2042	98.3958	98.8083	8.27583	8.15667	8.68583	8.52208	9.04542	8.48781	0	13970.8	-7.0353	-13.3347	-101.776	27.8619	4.90168													14018.2	-6.86544	-13.0178	-99.2192	29.3858	4.92328		934.624	99.9	2.314	117.263		99.9	3.603	120.25		99.9	4.175
2021-02-04 20:00:00	-0.324697	98.3708	97.5708	98.1167	98.125	98.5083	8.06042	7.9165	8.39292	8.20583	8.74875	8.20818	0	13763.4	-7.0286	-13.3091	-101.53	20.9514	4.94358													13922.1	-6.81648	-12.9173	-98.6079	24.9272	4.7307		934.28	99.9	1.799	154.021	7.967	99.898	3.215	155.195		99.9	3.84
2021-02-04 21:00:00	-0.189972	98.0083	97.3708	98.1958	98.1875	98.4875	8.00587	7.83071	8.28458	8.09375	8.65333	8.08953	0	13587.9	-7.01834	-13.2816	-101.271	16.5451	4.98156													13725	-6.81156	-12.9021	-98.112	21.7256	5.10467		933.926	99.9	2.061	168.213	7.8	99.9	3.158	163.282		99.9	3.742
2021-02-04 22:00:00		98.4917	97.7875	98.5458	98.5708	98.9292	7.917	7.761	8.19	7.99371	8.54	7.98453	0	13500.1	-6.99828	-13.2485	-100.979	19.03	5.00879													13539	-6.81029	-12.8952	-97.7223	19.3429	5.43953		934.364	99.9	1.71	168.08		99.9	2.482	161.498		99.9	2.918
2021-02-04 23:00:00		98.3833	97.8	99.0875	99.0708	98.9708	7.74254	7.52146	7.79188	7.53371	8.10033	7.43987	0	13412.4	-6.97822	-13.2154	-100.687	21.5149	5.03601													13453.5	-6.84186	-12.964	-98.2903	24.3433	5.4218		934.639	99.9	1.253	164.713	7.683	99.793	1.92	152.089		99.9	2.431
2021-02-05		99.6167	99.0542	99.9792	99.8708	99.7458	7.29229	7.02333	7.16671	6.81442	7.18133	6.62382	0	12797.3	-7.23633	-13.7009	-105.021	21.456	4.58603													13368	-6.87344	-13.0328	-98.8583	29.3437	5.40407		934.795	99.9	1.51	105.168		99.9	2.226	116.041		99.9	2.593
2021-02-05 01:00:00		100	100	100	100	100	7.03692	6.73133	6.68829	6.29946	6.26896	5.53942	0	12144.4	-7.51439	-14.2236	-109.687	21.2147	4.10183													13253.3	-6.91843	-13.1161	-99.5159	28.6157	5.41298		934.812	99.9	1.323	57.064	7.471	99.835	2.142	79.533		99.9	2.394
2021-02-05 02:00:00	-0.306218	100	100	100	100	100	7.05121	6.65475	6.46263	5.99062	6.18417	5.16867	0	12012.4	-7.59273	-14.3706	-110.805	21.0144	4.16051													13129.6	-6.9675	-13.2038	-100.201	26.1428	5.43001		934.403	99.9	1.458	74.167	7.45	98.82	2.193	83.308		99.9	2.606
2021-02-05 03:00:00	-0.176041	99.4208	99.8167	100	100	100	7.29721	6.85958	6.81658	6.42938	6.83133	5.89306	0	12227.4	-7.53793	-14.2672	-109.557	20.8415	4.58104													12917.7	-7.03872	-13.3335	-101.028	23.819	5.64043	7.923	934.19	99.75	0.954	85.943	7.507	97.642	1.776	108.836	7.593	99.73	2.416
2021-02-05 04:00:00	-0.263406	94.9833	97.2708	100	100	100	7.52471	6.83029	6.35592	5.73	6.00183	5.06555	0	12205.9	-7.55779	-14.3037	-109.461	20.3936	4.96837													12590.3	-7.13891	-13.5181	-102.041	21.69	6.10381	8.303	934.239	89.902	1.221	3.95	8.27	86	1.472	69.871	8.277	86.285	1.688
2021-02-05 05:00:00	-0.308609	92.8167	94.9833	100	100	100	7.52017	6.85033	6.24833	5.6185	5.84279	4.7043	0	11534.2	-7.78288	-14.7248	-112.534	19.1893	5.26442													12255.5	-7.24506	-13.7143	-103.154	19.8152	6.56093	8.59	934.258	84.74	1.076	249.35	8.557	81.105	1.511	163.369	8.625	79.532	1.933
2021-02-05 06:00:00	0.393706	87.8417	92.3042	100	100	100	7.85492	6.76883	5.87087	5.20179	5.15971	4.14557	0	10862.5	-8.00798	-15.1459	-115.607	17.9851	5.56048													11853.3	-7.40461	-14.0153	-105.16	20.2222	6.96174	8.613	934.241	80.368	1.341	317.726	8.893	75.17	1.212	97.24	9.088	73.053	1.435
2021-02-05 07:00:00	13.9788	85.6792	88.1792	98.0542	99.475	100	8.07596	7.48992	6.947	6.21442	6.34317	5.63221	0	11518.3	-7.90228	-14.9523	-112.697	20.7475	6.92132													11451.1	-7.56416	-14.3162	-107.167	20.6292	7.36256	8.85	934.42	77.148	0.657	57.098	9.187	72.453	1.167	70.268	10.01	62.763	1.704
2021-02-05 08:00:00	76.3763	86.1054	86.6021	91.8833	92.3917	96.5458	8.10967	7.946	8.18429	7.80875	8.08708	7.35201	0	12268.6	-7.77305	-14.715	-109.362	23.7921	8.35791													11642.2	-7.60251	-14.3895	-107.736	21.2498	7.37977	8.212	934.416	84.19	1.482	327.061	9.038	72.088	1.214	57.357	9.805	63.875	2.214
2021-02-05 09:00:00	142.099	87.8292	87.4208	90.1708	88.825	89.8458	8.64996	8.57387	9.19917	9.01183	9.61958	8.94692	0	12549.2	-7.79872	-14.7681	-109.063	26.3905	9.08179													12013.8	-7.60398	-14.3935	-107.868	21.9354	7.28027	8.565	934.892	86.412	1.676	71.568	8.137	82.743	3.139	69.74	8.8	73.977	4.182
2021-02-05 10:00:00	223.027	79.275	78.5962	80.4613	78.9537	79.2417	10.1046	10.1442	11.0754	10.9733	11.6308	10.9885	0	12517	-7.92758	-15.0147	-110.787	28.6916	9.33085													12237	-7.6087	-14.4036	-107.698	22.5866	7.53088	9.793	935.061	75.968	1.164	67.883	9.077	73.945	2.028	80.704	9.157	68.335	2.908
2021-02-05 11:00:00	237.294	76.2254	74.7546	75.1833	73.7621	75.2867	10.94	11.1104	12.1825	12.0821	12.3783	11.9481	0	12589.3	-7.95353	-15.0664	-110.973	30.2429	9.55767													12266.4	-7.61765	-14.4216	-107.134	23.1929	8.23906	10.648	935.155	72.953	2.514	115.09	9.735	74.93	3.723	99.257	9.618	74.165	4.284
2021-02-05 12:00:00	189.102	77.1775	75.8758	75.3608	74.2192	75.8146	11.5379	11.6558	12.8733	12.7654	12.9067	12.342	0	12949.2	-7.69659	-14.5822	-106.934	29.733	9.72339													12333	-7.6139	-14.4156	-106.427	23.8064	8.89845	11.28	935.224	73.822	1.667	151.03	10.433	75.562	2.154	143.878	10.145	76.902	2.312
2021-02-05 13:00:00	324.927	75.4833	74.5992	73.8296	73.5571	71.5192	12.0867	12.1212	13.2621	13.0275	14.3417	13.5803	0	13309	-7.43964	-14.098	-102.895	29.2232	9.8891													12732	-7.49633	-14.1958	-104.445	24.4852	9.12103	11.675	934.984	72.583	2.52	122.774	10.585	75.467	3.321	127.287	10.26	77.523	3.555
2021-02-05 14:00:00	215.132	76.0692	75.7558	76.8113	76.0883	71.975	12.2604	12.1592	12.7479	12.6092	14.3729	13.2868	0	13331.1	-7.42924	-14.0865	-102.896	33.5586	9.79618													13131.1	-7.37877	-13.9759	-102.464	25.164	9.3436	11.868	934.8	73.415	3.795	80.346	10.912	75.997	5.228	78.966	10.628	78.328	5.544
2021-02-05 15:00:00	118.794	75.3646	75.6858	76.8458	76.6583	73.8275	12.3163	12.0317	12.5667	12.2379	13.6446	12.319	0	13329.1	-7.43635	-14.1086	-103.184	38.2379	9.6849													13147.3	-7.20649	-13.6476	-100.546	22.946	8.63486	12.19	933.887	71.477	3.161	80.892	11.46	73.207	4.324	78.371	11.187	75.058	4.347
2021-02-05 16:00:00	35.8551	83.1442	82.8458	84.3708	84.75	83.2125	10.2483	10.1633	10.3087	10.0162	10.9317	9.71861	0	13058.4	-7.37061	-13.9788	-103.466	34.9407	8.36433													13047.4	-7.0176	-13.2863	-98.6473	19.8487	7.64343	10.565	932.973	78.932	1.514	123.811	10.14	79.29	2.247	117.443	9.92	81.405	2.573
2021-02-05 17:00:00	-0.26091	89.7667	90.0375	92.5875	94.0458	94.1542	8.83125	8.545	8.12654	7.56104	8.01558	6.49247	0	12609	-7.25639	-13.7478	-103.743	26.3351	6.23899													13031.7	-6.87156	-13.0129	-97.2641	20.604	6.83925	9.54	932.549	86.233	2.329	143.671	9.397	84.828	4.091	148.342	9.243	88.08	5.158
2021-02-05 18:00:00	-0.324806	94.1042	94.1125	96.5875	97.7792	97.4375	8.03538	7.7555	7.46271	7.01675	7.06792	5.61558	0																			13126.1	-6.78151	-12.8542	-96.5541	26.393	6.27975	8.923	932.267	96.382	2.445	121.957	8.415	92.422	3.943	130.005	8.388	97.397	4.562
2021-02-05 19:00:00	-0.334073	97.7083	97.775	99.3583	99.9583	100	7.39308	7.05046	6.52963	6.00342	5.89346	4.4146	0																			13203.9	-6.70319	-12.7157	-95.9332	31.1382	5.79228		932.111	99.9	2.176	106.576	8	95.785	3.282	120.826		99.9	4.084
2021-02-05 20:00:00	-0.335534	99.1792	99.2167	100	100	100	7.08338	6.69767	6.17263	5.62867	5.64487	4.31183	0																			13132.5	-6.72972	-12.7571	-96.108	26.5554	5.94851		932.242	99.9	1.706	91.346	7.807	96.067	2.841	109.536	8	99.753	3.5
2021-02-05 21:00:00	-0.657654	99.8917	99.9958	100	100	100	7.05408	6.4245	5.97904	5.33338	5.28937	4.48842	0													12506.8	-6.88664	-13.0591	-99.5479	30.1201	4.92484	13061	-6.75625	-12.7984	-96.2827	21.9726	6.10473		932.234	99.9	1.218	105.627	7.605	96.253	2.589	121.466	7.7	99.842	2.885
2021-02-05 22:00:00		94.775	97.1375	100	100	100	7.54629	6.89104	6.07567	5.43963	5.56379	4.44163	0													12497.3	-6.88296	-13.0494	-98.8187	28.6563	5.57671	12917.3	-6.80659	-12.891	-96.7982	20.8271	6.33003	8.522	932.133	89.945	0.689	233.723	8.258	85.722	0.796	172.012	8.167	88.688	0.639
2021-02-05 23:00:00		94.225	95.7875	100	100	100	7.28821	6.72637	5.85888	5.29229	5.54121	4.38538	0													12442.7	-6.90215	-13.0842	-98.6595	27.9508	6.01443	12750.9	-6.86437	-12.9996	-97.4202	20.7563	6.57693	8.083	932.07	90.518	1.655	154.413	8.167	85.805	2.368	139.067	8.405	83.567	1.9
2021-02-06		95.1958	96.7833	100	100	100	7.18238	6.61908	5.83721	5.20162	5.29779	4.20708	0	11221.6	-7.76082	-14.6745	-111.869	14.4331	5.52689	12002.6	-7.05442	-13.3594	-101.112	21.8578	5.76383	12356.7	-6.93725	-13.15	-98.8963	27.7721	6.30335	12584.5	-6.92214	-13.1083	-98.0423	20.6855	6.82383	7.922	932.13	93.643	1.312	132.971	8.198	84.735	2.92	131.449	9.115	74.307	2.633
2021-02-06 01:00:00		94.5208	96	100	100	100	7.29904	6.81692	6.20229	5.61054	5.3275	4.44606	0	11140.5	-7.82687	-14.7987	-112.537	14.4128	5.85228	11950.3	-7.09809	-13.4417	-101.145	21.8944	6.38796	12270.8	-6.97234	-13.2157	-99.1331	27.5935	6.59228	12418.2	-6.97992	-13.2169	-98.6643	20.6148	7.07073	7.973	932.169	93.358	1.279	100.092	9.023	75.005	2.453	103.592	9.998	63.75	3.34
2021-02-06 02:00:00	-0.13553	91.2292	93.3875	100	100	100	7.69075	7.10596	6.31058	5.57783	5.50883	4.53336	0	11312.8	-7.81258	-14.7765	-111.484	16.9153	6.72843	11898	-7.14175	-13.5239	-101.179	21.9309	7.01209	12184.9	-7.00744	-13.2814	-99.3699	27.4148	6.8812	12233.6	-7.04618	-13.3415	-99.3825	20.5776	7.34947	8.415	931.956	84.952	1.879	65.073	8.83	75.315	3.47	70.686	9.942	62.808	4.968
2021-02-06 03:00:00	-0.096465	89.3542	91.45	100	100	100	7.5635	6.99279	6.16312	5.57283	5.75838	4.95683	0	11485	-7.79829	-14.7543	-110.43	19.4178	7.60457	11845.6	-7.18542	-13.6061	-101.213	21.9675	7.63622	12098.9	-7.04253	-13.3471	-99.6067	27.2362	7.17013	11865.1	-7.19781	-13.6273	-101.07	20.8788	7.94896	8.192	931.175	83.137	1.391	105.124	8.582	75.313	2.746	115.359	10.028	59.822	3.617
2021-02-06 04:00:00	-0.077234	81.3796	84.0387	97.7083	99.5042	100	8.37558	7.73225	6.71958	5.82092	5.82487	5.20037	0	11657.3	-7.784	-14.7321	-109.376	21.9203	8.48072	11793.3	-7.22908	-13.6884	-101.247	22.0041	8.26035	11828.7	-7.16284	-13.5728	-100.8	26.9052	7.7827	11496.6	-7.34944	-13.9132	-102.757	21.1801	8.54845	9.117	930.659	72.585	1	93.522	9.452	65.715	2.507	116.093	10.613	54.035	4.382
2021-02-06 05:00:00	-0.073258	74.0667	75.7588	87.425	90.1083	99.4708	9.10792	8.61667	7.946	6.998	6.29196	5.62666	0	11829.6	-7.76971	-14.7099	-108.322	24.4228	9.35687	11689.3	-7.33535	-13.8868	-102.116	21.1938	8.97806	11543.2	-7.29017	-13.8117	-102.072	26.5618	8.42194	11128.2	-7.50108	-14.199	-104.444	21.4813	9.14794	9.787	930.295	65.057	1.526	61.318	11.233	50.725	2.647	81.815	11.913	44.662	4.484
2021-02-06 06:00:00	0.439942	76.2392	77.4075	85.4583	88.6083	97.4208	8.70083	8.27104	7.75596	6.88525	6.29767	5.55741	0	11886.6	-7.76977	-14.7124	-107.541	25.7204	10.1585	11568.6	-7.46169	-14.1224	-103.253	20.1119	9.72578	11257.8	-7.4175	-14.0507	-103.344	26.2183	9.06119	10759.7	-7.65271	-14.4849	-106.131	21.7826	9.74743	9.28	929.751	68.883	1.772	64.906	10.072	59.105	3.71	68.466	11.635	45.083	5.112
2021-02-06 07:00:00	18.0459	77.3225	78.5467	86.05	88.5958	96.0417	8.63833	8.21875	7.82304	7.16108	6.83604	6.01752	0	11863.5	-7.77979	-14.7321	-106.949	26.1826	10.9084	11448	-7.58803	-14.358	-104.391	19.03	10.4735	10972.4	-7.54482	-14.2896	-104.616	25.8749	9.70044	10580.3	-7.74922	-14.6671	-107.047	22.1756	10.2905	9.215	929.071	69.31	1.536	82.746	10.05	56.712	2.993	99.963	10.75	48.542	4.802
2021-02-06 08:00:00	67.8655	73.2979	73.8742	80.4054	82.3933	89.9	9.29208	9.06042	9.0875	8.69454	8.56625	7.54006	0	11840.5	-7.78982	-14.7518	-106.356	26.6449	11.6583	11327.3	-7.71437	-14.5937	-105.528	17.9481	11.2212	10771.6	-7.65061	-14.4882	-105.632	25.6443	10.2728	10657.7	-7.77082	-14.7087	-106.913	22.6935	10.7567	9.618	928.461	66.27	1.365	79.235	9.827	58.662	3.056	84.361	10.648	51.473	4.158
2021-02-06 09:00:00	134.396	75.8846	75.6492	78.51	77.8271	78.8721	9.775	9.7025	10.3408	10.1608	10.4962	9.3295	0	11817.4	-7.79984	-14.7715	-105.764	27.1071	12.4082	11212	-7.82995	-14.8095	-106.565	17.0959	11.9107	10815.1	-7.69419	-14.5703	-105.91	25.7399	10.6521	10735.2	-7.79241	-14.7503	-106.779	23.2114	11.223	9.762	928.164	70.76	1.628	82.681	9.692	64.483	2.806	85.379	10.653	55.202	4.44
2021-02-06 10:00:00	162.188	67.9058	67.3421	70.4129	68.9342	70.2992	11.3821	11.3404	12.0962	11.9642	12.2933	11.1325	0	11794.4	-7.80986	-14.7913	-105.172	27.5694	13.1581	11150.2	-7.8375	-14.8264	-106.596	18.5503	12.0149	10858.6	-7.73776	-14.6524	-106.188	25.8354	11.0315	10812.7	-7.81401	-14.7919	-106.646	23.7292	11.6893	11.257	927.946	62.362	1.686	137.799	10.667	61.515	3.172	124.568	10.59	59.998	4.984
2021-02-06 11:00:00	161.283	66.835	66.2592	67.7296	66.9479	67.9567	11.6408	11.6421	12.4796	12.3488	12.8658	11.938	0	11679.4	-7.80117	-14.7748	-105.29	27.5274	12.9092	11088.4	-7.84504	-14.8433	-106.627	20.0046	12.1192	10902.1	-7.78134	-14.7346	-106.466	25.931	11.4108	10890.2	-7.8356	-14.8335	-106.512	24.2471	12.1556	11.65	927.5	60.992	2.229	129.294	10.958	61.598	3.08	118.529	10.74	61.83	3.974
2021-02-06 12:00:00	148.488	62.7958	62.2846	63.9421	63.1683	63.9021	12.5762	12.4958	13.2142	13.0962	13.6121	12.6614	0	11556.8	-7.79094	-14.7554	-105.466	27.4439	12.578	11026.6	-7.85259	-14.8602	-106.658	21.459	12.2235	10945.6	-7.82492	-14.8167	-106.744	26.0265	11.7901	10996	-7.7768	-14.7226	-105.914	24.1248	11.8673	12.622	927.372	56.718	3.123	79.143	11.93	56.96	4.457	86.534	11.715	56.862	4.895
2021-02-06 13:00:00	136.355	60.7375	60.1858	61.8162	61.0429	61.7917	12.9021	12.7883	13.5479	13.405	13.7775	12.7045	0	11434.2	-7.78071	-14.7361	-105.642	27.3604	12.2469	10964.8	-7.86014	-14.8771	-106.689	22.9133	12.3277	11073.5	-7.7622	-14.701	-106.168	27.242	11.4396	11111	-7.69225	-14.563	-105.167	23.7975	11.3373	13.003	927.246	54.697	4.404	95.841	12.348	54.982	6.93	97.958	12.103	54.99	7.904
2021-02-06 14:00:00	85.5077	61.9646	61.4288	63.3025	62.5962	63.2675	12.5708	12.4675	13.0904	12.9371	13.2713	12.1258	0	11311.5	-7.77048	-14.7167	-105.818	27.2769	11.9157	11023.7	-7.80407	-14.7732	-106.18	23.7527	12.0053	11259.8	-7.62585	-14.4482	-105.002	29.2332	10.5837	11225.9	-7.6077	-14.4034	-104.42	23.4702	10.8073	12.767	925.376	55.762	5.094	120.003	12.212	55.86	7.711	125.345	12.027	55.627	9.109
2021-02-06 15:00:00	60.0843	67.1679	66.6379	68.0037	67.4287	68.3746	11.8642	11.7462	12.3871	12.2233	12.5421	11.4468	0	11262.1	-7.73378	-14.6472	-105.71	27.0464	11.4672	11246.6	-7.66162	-14.5053	-104.939	23.757	11.1035	11446.1	-7.4895	-14.1955	-103.836	31.2243	9.72778	11340.8	-7.52315	-14.2437	-103.672	23.1429	10.2774	12.057	924.547	61.247	4.159	145.468	11.488	61.61	6.505	147.55	11.315	61.612	7.961
2021-02-06 16:00:00	23.2401	71.8983	71.5225	73.0992	72.6258	73.0792	11.0317	10.9058	11.3875	11.2229	11.65	10.6127	0	11423.5	-7.62077	-14.4334	-104.787	26.3923	10.6802	11469.5	-7.51916	-14.2373	-103.697	23.7613	10.2016	11632.4	-7.35316	-13.9427	-102.67	33.2154	8.87187	11454.8	-7.44113	-14.0888	-102.947	22.8191	9.76321	11.325	922.961	66.16	4.777	150.816	10.825	66.42	7.725	148.871	10.632	66.868	8.923
2021-02-06 17:00:00	-0.239859	76.2696	76.0033	78.0575	77.5829	77.8483	10.2812	10.1204	10.455	10.2608	10.7575	9.74764	0	11584.9	-7.50776	-14.2196	-103.863	25.7382	9.89328	11692.5	-7.3767	-13.9693	-102.455	23.7656	9.2997	11818.6	-7.21681	-13.6899	-101.504	35.2065	8.01596	11559.7	-7.38439	-13.9816	-102.445	22.5313	9.40718	10.595	923.246	70.888	6.689	145.156	10.173	70.775	11.011	146.756	10.05	71.033	12.499
2021-02-06 18:00:00	-0.358797	78.0183	77.8158	80.1146	79.6333	79.8446	9.97583	9.81958	10.0846	9.89333	10.405	9.36992	0	11746.3	-7.39475	-14.0058	-102.94	25.0841	9.10634	11915.4	-7.23424	-13.7014	-101.213	23.7698	8.39782	11865.3	-7.18697	-13.6302	-101.211	33.2846	7.83027	11664.6	-7.32766	-13.8743	-101.943	22.2434	9.05115	10.33	923	72.7	6.508	136.328	9.913	72.535	11.018	138.592	9.762	73.387	13.298
2021-02-06 19:00:00	-0.394043	79.6946	79.6429	82.5083	82.3625	82.45	9.59458	9.38417	9.43708	9.14333	9.72708	8.49841	0	11907.7	-7.28173	-13.7919	-102.016	24.43	8.31939	11965.4	-7.18702	-13.6117	-100.861	23.3318	8.03212	11900.5	-7.16583	-13.5862	-100.99	31.0426	7.6994	11769.5	-7.27092	-13.767	-101.441	21.9555	8.69512	10.023	922.91	74.208	4.887	133.735	9.66	74.018	7.819	134.088	9.5	75.275	9.342
2021-02-06 20:00:00	-0.286114	80.5179	80.7662	84.4167	84.5458	85.875	9.40042	9.1175	9.04333	8.68	8.97833	7.72056	0	11885	-7.25382	-13.7367	-102.127	22.9573	7.76664	11960	-7.17028	-13.5791	-100.795	22.7522	7.83805	11935.7	-7.1447	-13.5423	-100.77	28.8007	7.56852	11874.4	-7.21419	-13.6597	-100.939	21.6676	8.33909	9.885	923.623	74.812	2.486	130.34	9.542	74.62	4.656	137.481	9.368	76.257	5.541
2021-02-06 21:00:00	-0.086212	80.075	80.3838	84.3	84.3417	85.6792	9.58167	9.31958	9.27625	8.96708	9.32333	8.02225	0	11734.7	-7.28481	-13.7912	-102.954	20.9182	7.37597	11954.6	-7.15354	-13.5465	-100.728	22.1726	7.64398	11970.9	-7.12356	-13.4983	-100.549	26.5587	7.43764	12016.8	-7.15454	-13.5476	-100.339	21.7436	8.04162	10.075	923.578	73.958	2.099	104.61	9.808	73.165	3.319	113.677	9.687	74.113	4.445
2021-02-06 22:00:00		80.1713	80.3454	83.7625	83.8917	86.1375	9.47833	9.2425	9.31042	8.97375	9.15417	7.88365	0	11584.5	-7.3158	-13.8457	-103.78	18.879	6.9853	11949.2	-7.1368	-13.5139	-100.662	21.593	7.44991	12074.2	-7.08715	-13.4263	-100.135	24.6724	7.2754	12210	-7.09095	-13.429	-99.6083	22.3134	7.82361	9.937	923.665	74.153	3.044	111.799	9.702	73.133	4.947	119.885	9.547	74.288	6.325
2021-02-06 23:00:00		79.4217	80.385	85.1917	85.7917	89.4167	9.36708	8.92417	8.51517	7.95171	7.63396	5.91119	0	11434.3	-7.34679	-13.9002	-104.607	16.8398	6.59464	11940.8	-7.15178	-13.5412	-100.998	21.1035	7.33161	12373.7	-7.00675	-13.2733	-99.1639	23.8103	7.0228	12403.3	-7.02735	-13.3104	-98.8774	22.8831	7.6056	10.063	923.481	72.302	2.798	91.132	9.85	71.462	4.579	95.975	9.652	72.91	5.344
2021-02-07		81.3308	82.155	87.9667	90.0708	89.7583	9.10667	8.72542	8.1285	7.35088	8.12829	6.31809	0	11284.1	-7.37778	-13.9547	-105.433	14.8006	6.20397	11902.1	-7.48224	-14.1632	-105.339	21.5107	7.96697	12673.3	-6.92635	-13.1204	-98.193	22.9482	6.77021	12596.6	-6.96376	-13.1918	-98.1465	23.4528	7.3876	9.737	922.967	75.08	1.884	33.591	9.63	74.045	2.44	66.009	9.49	75.315	3.058
2021-02-07 01:00:00		90.5958	90.3917	92.1333	92.4833	92.5083	8.45167	8.29125	8.54917	8.2825	8.90875	7.95146	0	11379.9	-7.86986	-14.8849	-112.263	17.7229	6.81629	11863.4	-7.81269	-14.7853	-109.68	21.9179	8.60234	12972.8	-6.84595	-12.9675	-97.2221	22.086	6.51762	12789.9	-6.90016	-13.0731	-97.4155	24.0225	7.16959	8.767	922.318	91.918	2.538	197.179	8.493	88.718	4.446	187.217	8.422	91.852	5.045
2021-02-07 02:00:00	-0.170239	94.6375	94.4125	95.7083	96.2458	96.3917	8.165	7.94692	8.13696	7.85363	8.51167	7.58057	0	11495.6	-8.39939	-15.8862	-119.579	21.0483	7.51008	11824.7	-8.14315	-15.4074	-114.021	22.3251	9.23771	13272.3	-6.76555	-12.8145	-96.2512	21.2239	6.26502	12651.4	-7.39713	-14.0072	-104.579	24.0382	7.47886	8.538	921.942	99.577	2.502	196.333	8.267	94.092	4.932	185.947	8.257	98.262	6.277
2021-02-07 03:00:00	-0.373465	93.7417	93.5917	95.6208	95.6125	95.4667	6.27696	6.16638	6.45988	6.21179	6.81708	5.85437	8.76293	11611.4	-8.92892	-16.8875	-126.896	24.3736	8.20387	11786.1	-8.47361	-16.0294	-118.362	22.7323	9.87308	13190.2	-7.14108	-13.5193	-101.715	20.6527	6.43876	12407	-8.0729	-15.277	-114.26	23.8772	7.95631	7.442	921.612	94.935	2.635	177.835	6.423	90.258	5.141	173.778	6.46	94.635	6.953
2021-02-07 04:00:00	-0.354397	98.8292	98.6958	100	100	100	5.20317	5.06892	5.31663	5.15412	5.68675	5.11726	3.35602	11727.1	-9.45845	-17.8888	-134.213	27.6989	8.89766	11779.1	-8.78793	-16.6232	-122.769	24.3723	10.217	12844.3	-7.83174	-14.8168	-111.628	20.2826	6.90717	12162.7	-8.74866	-16.5468	-123.941	23.7162	8.43377		920.871	99.9	4.405	274.685	5.803	93.183	7.779	274.497	5.978	95.402	8.514
2021-02-07 05:00:00	-0.286582	99.95	99.8792	100	100	100	4.71346	4.62113	4.97221	4.794	5.37525	5.02994	1.67801	11811	-9.88348	-18.6916	-140.023	29.9323	9.51013	11815.3	-9.08037	-17.1787	-127.264	27.6837	10.1658	12498.4	-8.52241	-16.1144	-121.54	19.9124	7.37559	11918.3	-9.42443	-17.8166	-133.622	23.5551	8.91123		920.523	99.9	2.774	345.747	5.038	99.608	5.484	319.847	5.192	99.827	5.608
2021-02-07 06:00:00	0.138617	100	100	100	100	100	4.66525	4.56629	4.92	4.74946	5.30525	5.21213	0	11803.3	-10.0078	-18.9233	-141.498	29.0237	9.88865	11851.5	-9.37281	-17.7342	-131.759	30.9951	10.1146	12152.5	-9.21307	-17.412	-131.452	19.5423	7.844	11691.9	-10.0602	-19.0116	-142.739	23.5853	9.35352		920.512	99.9	1.424	61.06		99.9	2.34	65.376	5	99.87	2.293
2021-02-07 07:00:00	4.50532	100	100	100	100	100	4.78183	4.70942	5.11929	4.96458	5.532	5.43005	0.186445	11795.6	-10.1322	-19.155	-142.973	28.1152	10.2672	11887.7	-9.66525	-18.2897	-136.254	34.3065	10.0634	11806.6	-9.90374	-18.7096	-141.364	19.1721	8.31242	11644.2	-10.2977	-19.4606	-146.239	25.5203	9.44543		919.869	99.9	0.789	225.448		99.9	1.173	257.833		99.9	2.02
2021-02-07 08:00:00	13.4365	100	100	100	100	100	4.70946	4.665	5.14271	4.99287	5.58958	5.42567	0.932227	11787.9	-10.2566	-19.3867	-144.448	27.2067	10.6457	11923.8	-9.95768	-18.8451	-140.749	37.6179	10.0122	11790.8	-10.2392	-19.3416	-146.244	20.5335	8.4891	11596.5	-10.5351	-19.9096	-149.74	27.4552	9.53734		919.607	99.9	0.801	188.664		99.9	1.308	189.669		99.9	1.439
2021-02-07 09:00:00	45.1644	100	100	100	100	100	4.53333	4.51987	5.06642	4.92417	5.42758	5.41661	1.67801	11780.3	-10.3809	-19.6185	-145.923	26.2982	11.0242	11982.2	-10.278	-19.4472	-145.419	38.2144	10.1582	11801.9	-10.5458	-19.9194	-150.714	22.0358	8.64202	11548.8	-10.7726	-20.3586	-153.24	29.3902	9.62924		919.457	99.9	1.016	95.601		99.9	1.345	87.168		99.9	1.507
2021-02-07 10:00:00	96.8524	100	100	100	100	100	5.04367	5.02008	5.61879	5.48404	5.98246	6.04914	0.372891	11664.8	-10.6875	-20.1928	-150.318	26.0284	11.2243	12047.5	-10.6072	-20.0641	-150.146	37.9445	10.3671	11813	-10.8523	-20.4973	-155.183	23.5381	8.79494	11501.1	-11.0101	-20.8077	-156.74	31.3252	9.72115	5.388	919.627	99.672	0.844	156.262	4.778	98.468	1.214	147.384	4.507	98.982	1.371
2021-02-07 11:00:00	142.559	99.9833	99.7875	100	100	100	5.17458	5.13058	5.67867	5.60013	6.08379	6.17161	0.186445	11475	-11.12	-21.0038	-156.729	26.1998	11.301	12112.9	-10.9364	-20.6811	-154.873	37.6745	10.576	11824.1	-11.1589	-21.0751	-159.653	25.0405	8.94786	11284.6	-11.3374	-21.421	-161.508	31.2369	9.86041	5.42	919.706	99.507	2.995	267.317	4.615	98.665	5.544	275.385	4.517	99.208	6.247
2021-02-07 12:00:00	280.132	97.3333	97.1917	99.9667	99.3458	98.6417	5.97808	5.98904	6.558	6.53671	7.05633	7.36381	0	11285.1	-11.5525	-21.8148	-163.14	26.3712	11.3778	12178.3	-11.2656	-21.298	-159.599	37.4046	10.7849	11613.9	-11.4192	-21.5648	-163.372	25.8317	9.14671	10839.2	-11.7865	-22.257	-167.992	28.4077	10.0638	6.234	919.673	96.642	4.232	262.807	5.038	96.107	6.461	263.778	5.129	98.512	7.13
2021-02-07 13:00:00	256.787	86.9458	86.8542	93.5333	90.0333	88.9125	6.64467	6.66413	7.07104	7.16617	7.79529	7.46628	0	11095.2	-11.985	-22.6258	-169.552	26.5427	11.4546	12140.8	-11.565	-21.8581	-163.888	36.6971	10.9771	10767.3	-11.5467	-21.8014	-164.933	24.5787	9.47758	10393.8	-12.2356	-23.093	-174.477	25.5785	10.2672	6.632	919.414	82.937	4.018	268.457	5.697	83.393	5.945	272.723	5.282	86.287	6.447
2021-02-07 14:00:00	269.815	80.8229	80.9842	84.0417	84.0375	81.9017	6.86125	6.77746	7.28342	7.19017	7.99608	7.90392	0	10905.4	-12.4175	-23.4368	-175.963	26.7141	11.5314	11077.7	-11.5665	-21.8515	-163.809	31.6265	11.0032	9920.8	-11.6741	-22.0379	-166.495	23.3257	9.80846	9948.44	-12.6846	-23.929	-180.961	22.7494	10.4706	6.598	918.759	76.482	4.843	280.438	5.622	77.318	7.677	281.626	5.252	78.882	8.326
2021-02-07 15:00:00	100.752	79.6258	79.9054	82.9775	82.9458	82.0217	5.76279	5.63262	5.91512	5.72029	6.48396	5.75516	0	10136.6	-12.2615	-23.1392	-173.51	23.7808	11.6035	10014.6	-11.568	-21.845	-163.73	26.556	11.0293	9074.27	-11.8016	-22.2744	-168.056	22.0727	10.1393	9503.07	-13.1337	-24.765	-187.446	19.9202	10.674	5.935	918.02	73.343	5.044	288.448	5.312	73.192	8.508	293.425	4.99	74.545	9.487
2021-02-07 16:00:00	33.5364	71.9279	71.9967	76.3729	76.4783	75.4504	5.10679	5.02767	4.92208	4.68679	5.42904	4.27941	0	9320.78	-12.0577	-22.7514	-170.336	20.5951	11.6752	8951.41	-11.5695	-21.8384	-163.652	21.4854	11.0554	8227.73	-11.929	-22.5109	-169.617	20.8197	10.4702	8939.97	-12.9913	-24.4943	-184.991	17.7108	10.9632	5.338	917.58	64.133	5.213	294.514	4.922	63.175	8.94	294.552	4.668	63.543	10.03
2021-02-07 17:00:00	-0.013263	72.7496	73.0008	77.055	77.1275	76.7613	3.72846	3.60396	3.56217	3.30671	3.90492	2.71772	0	8504.94	-11.8539	-22.3636	-167.162	17.4094	11.7469	7888.26	-11.571	-21.8318	-163.573	16.4149	11.0815	7720.75	-11.9243	-22.499	-169.286	19.1869	10.7055	8339.35	-12.6604	-23.8709	-179.687	15.6989	11.2797	4.155	917.658	64.853	5.046	296.01	4.013	63.093	9.256	296.234	3.952	62.27	10.981
2021-02-07 18:00:00	-0.25416	72.9275	73.275	77.3575	77.0825	77.2846	3.18696	3.01758	2.95012	2.73125	3.28171	1.99892	0	7689.1	-11.6501	-21.9759	-163.988	14.2237	11.8187	7224.41	-11.5613	-21.8077	-163.298	13.1998	11.1634	7447.96	-11.8283	-22.3157	-167.65	17.2921	10.875	7738.74	-12.3295	-23.2474	-174.383	13.687	11.5963	3.648	917.659	64.665	4.762	292.122	3.537	62.783	9.489	293.435	3.523	61.768	12.363
2021-02-07 19:00:00	-0.257824	73.36	73.8413	78.3758	78.1525	77.9729	2.6585	2.47771	2.30079	2.06808	2.70258	1.36388	0	7068.48	-11.4999	-21.6907	-161.584	12.2173	11.942	7099.75	-11.5365	-21.76	-162.759	12.4903	11.3208	7175.18	-11.7324	-22.1324	-166.015	15.3973	11.0444	7138.12	-11.9986	-22.624	-169.079	11.6751	11.9128	3.183	917.791	64.793	3.758	310.665	3.115	62.745	7.672	304.056	3.203	61.187	11.254
2021-02-07 20:00:00	-0.308874	73.2204	73.6292	78.0588	77.6921	77.6575	2.46471	2.27208	2.12787	1.89817	2.484	1.1445	0	7006.96	-11.5032	-21.6995	-161.383	13.5883	12.2131	6975.1	-11.5118	-21.7123	-162.22	11.7808	11.4781	6902.39	-11.6364	-21.9491	-164.379	13.5025	11.2139	6595.39	-11.6945	-22.0515	-164.211	10.0549	12.2018	2.93	918.139	64.823	3.028	319.733	3.11	61.573	6.515	309.887	3.315	59.5	10.061
2021-02-07 21:00:00	-0.502014	76.965	77.375	81.4617	81.5792	82.0271	1.62333	1.42017	1.231	0.94875	1.43567	0.345169	0	6945.45	-11.5065	-21.7084	-161.183	14.9594	12.4841	6850.44	-11.487	-21.6646	-161.681	11.0713	11.6354	6629.61	-11.5405	-21.7658	-162.743	11.6077	11.3833	6624.49	-11.6555	-21.9826	-163.643	12.3045	12.2178	2.15	918.405	68.747	3.33	301.155	2.25	66.193	7.556	300.358	2.505	64.168	9.836
2021-02-07 22:00:00		78.5275	79.1433	83.7708	83.6667	83.3833	1.37042	1.14425	0.881333	0.623417	1.2565	0.213859	0	6883.93	-11.5099	-21.7172	-160.982	16.3305	12.7552	6725.78	-11.4623	-21.6168	-161.142	10.3618	11.7928	6645.26	-11.5089	-21.7076	-162.304	12.1654	11.3566	6653.58	-11.6165	-21.9137	-163.075	14.554	12.2338	1.93	918.553	70.325	2.454	291.986	2.427	65.547	5.381	283.439	2.632	63.962	7.316
2021-02-07 23:00:00		77.9608	78.4896	82.9708	82.8167	82.5042	1.54425	1.32404	1.10329	0.832375	1.47375	0.289953	0	6822.41	-11.5132	-21.726	-160.782	17.7015	13.0262	6721.17	-11.4541	-21.6029	-160.927	11.1128	11.8965	6684.1	-11.4825	-21.6595	-161.962	12.9202	11.3142	6682.68	-11.5775	-21.8447	-162.508	16.8036	12.2499	2.057	918.541	69.888	3.082	290.681	2.352	66.152	6.699	284.368	2.482	65.058	8.274
2021-02-08		81.7358	82.2625	86	86.0042	86.075	0.843625	0.629083	0.486833	0.210083	0.786417	-0.330202	0	6779.27	-11.5194	-21.7382	-160.847	18.1115	13.0587	6754.66	-11.4511	-21.5996	-160.814	12.3274	11.9832	6722.94	-11.4561	-21.6114	-161.62	13.6749	11.2717	6711.78	-11.5385	-21.7758	-161.94	19.0532	12.2659	1.415	918.451	74.183	2.954	291.861	1.765	70.078	6.905	287.365	2.1	68.098	8.423
2021-02-08 01:00:00		84.3125	84.9667	88.9292	88.975	89.2042	0.38375	0.155208	-0.078875	-0.367375	0.161958	-0.80851	0	6748.77	-11.5274	-21.7529	-161.096	17.8597	12.9271	6788.16	-11.4482	-21.5964	-160.701	13.542	12.0699	6761.77	-11.4297	-21.5633	-161.277	14.4297	11.2293	6714.16	-11.5261	-21.755	-161.724	20.3102	12.3162	1.005	918.363	77.035	2.839	298.841	1.267	73.575	6.011	288.56	1.772	70.712	7.173
2021-02-08 02:00:00	-0.110455	85.1875	85.9917	90.2875	90.325	90.825	0.288625	0.028333	-0.251417	-0.590417	-0.107833	-0.982458	0	6718.28	-11.5355	-21.7676	-161.345	17.6079	12.7954	6821.66	-11.4453	-21.5931	-160.588	14.7567	12.1566	6768.4	-11.425	-21.5566	-161.203	15.5585	11.2496	6680.49	-11.5498	-21.7992	-161.981	20.2276	12.4127	0.99	918.269	77.46	2.578	299.19	1.237	73.933	4.841	292.003	1.48	72.453	6.109
2021-02-08 03:00:00	-0.150964	84.3792	85.1708	89.6292	89.4292	89.6958	0.422583	0.167917	-0.106125	-0.422125	0.149625	-0.819526	0	6687.78	-11.5436	-21.7822	-161.594	17.3561	12.6637	6846.07	-11.4489	-21.6021	-160.542	15.9121	12.2744	6682.74	-11.4826	-21.6686	-161.899	17.7589	11.4495	6646.82	-11.5735	-21.8435	-162.239	20.1449	12.5093	1.077	918.047	76.66	2.82	292.122	1.547	71.475	4.897	292.695	1.812	68.902	5.982
2021-02-08 04:00:00	-0.215123	85.9375	87.0292	91.2542	92.2958	92.7667	-0.122458	-0.466083	-0.840542	-1.47237	-1.05779	-1.39274	0	6657.29	-11.5517	-21.7969	-161.843	17.1044	12.532	6780.79	-11.5174	-21.7315	-161.154	16.483	12.6984	6597.09	-11.5401	-21.7806	-162.595	19.9593	11.6494	6613.15	-11.5972	-21.8877	-162.496	20.0623	12.6058	0.865	918.077	77.247	2.836	299.164	1.123	73.617	4.952	291.696	1.242	72.505	6.036
2021-02-08 05:00:00	-0.283211	83.8083	85.2625	91.1708	92.3958	93.25	-0.028167	-0.400792	-0.934833	-1.57963	-1.17542	-1.80005	0	6680.46	-11.6025	-21.8953	-161.785	18.7624	13.3771	6715.51	-11.5859	-21.861	-161.765	17.0539	13.1224	6511.43	-11.5977	-21.8925	-163.291	22.1598	11.8493	6579.48	-11.6209	-21.932	-162.753	19.9797	12.7023	0.832	917.917	74.743	2.282	271.87	1.262	70.122	3.156	287.358	1.647	66.793	4.281
2021-02-08 06:00:00	1.64121	81.7717	83.0625	88.8375	89.7458	90.5458	0.134042	-0.21975	-0.680542	-1.24104	-0.821583	-1.74896	0	6707.93	-11.6568	-22.0004	-161.702	20.5737	14.3006	6650.23	-11.6544	-21.9904	-162.377	17.6248	13.5464	6425.77	-11.6553	-22.0045	-163.987	24.3602	12.0492	6757.96	-11.5448	-21.7936	-161.264	22.2866	13.0852	1.148	917.918	71.853	2.602	294.542	1.887	64.582	3.368	298.191	2.415	58.245	4.612
2021-02-08 07:00:00	101.881	74.1287	75.2262	84.4708	85.3292	85.3817	1.98846	1.71933	0.573	0.048083	0.742917	-0.638204	0	6735.41	-11.7111	-22.1055	-161.62	22.385	15.2241	6584.95	-11.7229	-22.1198	-162.988	18.1958	13.9704	6607.32	-11.5783	-21.862	-162.37	25.36	12.5262	7003.73	-11.4371	-21.5974	-159.22	25.3515	13.5588	1.788	917.928	68.073	2.829	293.008	2.592	58.372	3.061	285.074	3.01	54.262	3.67
2021-02-08 08:00:00	251.157	62.985	62.5083	73.3983	72.5733	70.7833	4.61746	4.77367	3.43237	3.0635	4.05292	2.10435	0	6762.89	-11.7654	-22.2106	-161.537	24.1963	16.1476	6698.97	-11.6891	-22.0588	-162.129	19.4805	14.3414	6972.72	-11.4088	-21.5445	-159.163	25.5335	13.1937	7249.51	-11.3294	-21.4011	-157.176	28.4163	14.0325	3.648	917.883	60.553	1.886	310.188	3.027	58.788	2.199	294.16	3.11	56.663	2.888
2021-02-08 09:00:00	345.679	67.1142	64.1217	70.4737	70.2496	69.5921	5.77688	6.52946	6.07775	5.86292	6.25583	4.13004	0	6865.64	-11.7551	-22.1941	-160.732	25.7182	16.8206	7054.73	-11.5173	-21.741	-159.287	21.7277	14.6411	7338.13	-11.2392	-21.2271	-155.955	25.707	13.8613	7495.28	-11.2216	-21.2048	-155.133	31.4811	14.5061	4.507	917.904	66.568	1.373	265.576	3.555	67.445	2.083	277.676	3.525	65.53	2.382
2021-02-08 10:00:00	438.666	66.8404	64.8146	68.5971	68.8104	69.9404	6.77588	7.26254	7.74442	7.46475	7.54879	7.16181	0	7183.29	-11.5603	-21.8302	-157.863	26.4135	16.7787	7410.5	-11.3456	-21.4232	-156.444	23.9749	14.9408	7703.54	-11.0697	-20.9096	-152.748	25.8806	14.5288	7725.84	-11.1204	-21.0199	-153.208	34.1207	14.9508	5.553	917.813	65.113	1.523	134.182	4.467	67.277	1.739	153.212	4.323	66.853	1.521
2021-02-08 11:00:00	445.815	63.0925	61.6675	63.6729	64.0371	63.9775	7.70304	8.04967	8.87917	8.67333	9.14417	9.25324	0	7500.93	-11.3655	-21.4663	-154.993	27.1089	16.7368	7766.26	-11.1738	-21.1053	-153.602	26.2221	15.2405	8068.95	-10.9002	-20.5921	-149.54	26.0541	15.1964	7807.09	-11.0826	-20.9462	-152.458	32.5868	15.1115	7.02	917.881	59.497	2.268	150.686	5.823	61.767	2.73	155.926	5.355	63.268	2.726
2021-02-08 12:00:00	452.384	60.5029	59.2771	61.4004	61.7338	60.3083	8.41338	8.70417	9.45	9.24583	10.0342	10.3858	0	7818.57	-11.1707	-21.1024	-152.124	27.8042	16.6949	8122.02	-11.002	-20.7875	-150.76	28.4693	15.5402	8227.55	-10.8241	-20.4529	-148.65	27.9243	14.9729	7888.34	-11.0448	-20.8726	-151.709	31.053	15.2721	7.505	918.118	56.613	3.057	231.271	6.338	58.638	4.094	237.743	5.902	59.878	4.253
2021-02-08 13:00:00	250.075	57.9742	56.4983	57.7654	58.3925	57.4933	8.54167	8.8125	9.7975	9.48542	10.1042	10.0645	0	8136.22	-10.9759	-20.7385	-149.255	28.4995	16.6529	8339.96	-10.8777	-20.5596	-149.239	31.259	15.2379	8369.55	-10.7556	-20.328	-147.946	29.9306	14.6779	7969.6	-11.0071	-20.7989	-150.959	29.5191	15.4328	8.125	918.33	53.19	2.76	234.518	7.037	54.888	3.8	238.755	6.637	55.938	3.932
2021-02-08 14:00:00	170.636	63.5433	62.5517	63.4571	63.7758	62.9604	7.82338	7.92737	8.7275	8.58408	9.18	8.87787	0	8482.75	-10.8247	-20.4584	-147.661	30.3754	16.0063	8514.13	-10.7685	-20.3602	-148.137	34.2211	14.7444	8511.56	-10.687	-20.2031	-147.242	31.937	14.3829	8050.85	-10.9693	-20.7253	-150.209	27.9853	15.5934	7.59	918.014	58.305	2.528	241.124	6.647	60.04	3.498	239.737	6.265	61.35	3.708
2021-02-08 15:00:00	79.7495	69.7733	69.0888	70.1883	70.42	70.0204	6.91529	6.94463	7.52921	7.40492	7.98725	7.41499	0	8849.13	-10.7034	-20.236	-146.944	33.0624	14.944	8688.3	-10.6593	-20.1609	-147.036	37.1832	14.2509	8653.56	-10.6184	-20.0783	-146.538	33.9433	14.088	8264.71	-11.0198	-20.8209	-151.039	28.5352	15.5277	6.955	917.487	64.155	2.596	239.623	6.185	65.513	3.446	242.944	5.865	66.967	3.68
2021-02-08 16:00:00	15.2467	76.365	75.9821	77.2113	77.5387	77.2796	5.87587	5.86421	6.2255	6.10808	6.66196	6.14599	0	9215.51	-10.5822	-20.0135	-146.227	35.7494	13.8818	8862.48	-10.5501	-19.9615	-145.935	40.1452	13.7574	8836.15	-10.7453	-20.3188	-148.748	35.5727	13.8021	8657.04	-11.1891	-21.1443	-153.997	31.8897	15.1573	6.162	917.258	70.597	2.281	246.9	5.633	70.73	3.097	245.504	5.422	71.258	3.16
2021-02-08 17:00:00	-0.253648	81.1946	81.0763	82.7933	82.9375	82.9021	5.17462	5.09858	5.35475	5.20479	5.75121	5.19109	0	9581.89	-10.461	-19.7911	-145.509	38.4364	12.8196	9044.34	-10.5326	-19.9333	-146.18	42.7108	13.2863	9134.45	-11.4292	-21.6008	-159.265	36.1273	13.5421	9049.38	-11.3583	-21.4678	-156.955	35.2442	14.7869	5.583	916.979	75.597	2.005	273.012	5.27	73.592	2.991	272.62	5.342	70.01	2.93
2021-02-08 18:00:00	-0.374759	90.6208	91.4042	92.9	94.4167	95.0333	4.394	4.24279	4.4945	4.31521	4.82304	4.61227	1.11867	9948.27	-10.3397	-19.5687	-144.792	41.1234	11.7573	9301.38	-11.4124	-21.5783	-159.592	41.4008	13.0344	9432.75	-12.1131	-22.8829	-169.781	36.6818	13.2822	9441.72	-11.5276	-21.7912	-159.913	38.5987	14.4164	4.932	916.762	85.437	2.87	270.717	4.945	78.19	4.038	264.047	4.903	76.202	3.249
2021-02-08 19:00:00	-0.398494	95.7583	96.6625	97.3792	98.8583	99.6875	3.68513	3.52992	3.85479	3.71163	4.16971	4.15637	1.67801	9950.19	-11.2566	-21.2836	-158.621	40.1869	11.6478	9558.42	-12.2921	-23.2233	-173.004	40.0907	12.7826	9731.05	-12.7969	-24.165	-180.298	37.2364	13.0222	9834.06	-11.6968	-22.1147	-162.871	41.9533	14.046	4.223	916.568	94.652	2.248	295.334	4.158	83.217	3.248	289.6	3.915	85.283	2.827
2021-02-08 20:00:00	-0.39648	97.8208	98.2375	98.9	99.8375	100	3.2405	3.09587	3.42267	3.28354	3.76996	3.83633	1.49156	9923.04	-12.2563	-23.1531	-173.611	38.9612	11.6143	9815.46	-13.1719	-24.8682	-186.415	38.7806	12.5307	10029.3	-13.4808	-25.447	-190.814	37.791	12.7623	9898.34	-12.2555	-23.1578	-171.811	40.683	13.4517	3.938	916.942	99.727	1.618	314.752	3.445	91.242	2.733	306.88	3.207	94.24	2.855
2021-02-08 21:00:00	-0.900269	99.7708	99.6417	99.9375	100	100	2.957	2.86471	3.20258	3.05758	3.56229	3.68165	1.86445	9895.89	-13.256	-25.0227	-188.601	37.7355	11.5808	10072.5	-14.0516	-26.5132	-199.827	37.4705	12.2789	10110.6	-13.8616	-26.1573	-197	36.3523	12.2586	9858.51	-12.9377	-24.4294	-182.649	37.9452	12.7865		917.161	99.9	1.464	316.463	3.02	93.893	2.752	312.453	2.842	96.747	3.078
2021-02-08 22:00:00		100	100	100	100	100	2.46471	2.39662	2.76792	2.60929	3.13021	3.18525	0.559336	9868.74	-14.2557	-26.8922	-203.59	36.5099	11.5472	10154.6	-14.5406	-27.4249	-207.492	35.2584	11.9069	10042.6	-14.0339	-26.4744	-200.208	33.5431	11.5873	9818.68	-13.6199	-25.7009	-193.486	35.2073	12.1212		917.348	99.9	1.609	292.54	2.455	98.393	2.902	294.96	2.795	99.89	2.982
2021-02-08 23:00:00		99.9	99.7958	100	100	100	2.41087	2.3055	2.58921	2.41962	2.97342	2.89108	0.372891	9836.06	-14.9382	-28.1676	-213.915	35.0774	11.4257	10000.8	-14.5027	-27.3478	-207.409	31.8302	11.3729	9974.57	-14.2063	-26.7915	-203.416	30.7338	10.9161	9778.85	-14.3021	-26.9725	-204.324	32.4694	11.4559		917.559	99.9	2.2	275.31	2.425	97.522	4.217	280.1		99.9	4.118
2021-02-09		99.9958	99.9625	100	100	100	2.54779	2.46433	2.72942	2.57571	3.13333	2.93853	0	9787.61	-14.7148	-27.7463	-210.917	33.0544	11.0529	9847.02	-14.4649	-27.2707	-207.327	28.4019	10.8389	9906.57	-14.3786	-27.1086	-206.624	27.9246	10.2448	9748.08	-14.8879	-28.0643	-213.682	29.9916	10.832		917.766	99.9	3.222	277.019	2.718	99.51	5.828	278.08	2.824	99.712	6.751
2021-02-09 01:00:00		99.8667	99.9042	100	100	100	2.56083	2.43354	2.58642	2.40013	2.95583	2.72298	0	9739.15	-14.4914	-27.3249	-207.92	31.0315	10.68	9693.24	-14.427	-27.1936	-207.244	24.9737	10.305	9838.56	-14.551	-27.4256	-209.832	25.1154	9.57359	9805.82	-14.5331	-27.4009	-208.594	30.0539	10.613	3.142	917.932	99.435	3.171	275.941	3.1	93.098	5.748	281.182	3.255	94.533	6.792
2021-02-09 02:00:00	-0.284117	99.5208	99.4333	100	100	100	2.26675	2.10825	2.068	1.8545	2.43617	1.98337	0	9690.7	-14.268	-26.9036	-204.922	29.0085	10.3072	9539.46	-14.3891	-27.1166	-207.161	21.5455	9.77098	9855.01	-14.1802	-26.7354	-204.546	26.929	9.33668	9863.57	-14.1782	-26.7374	-203.505	30.1162	10.3939	2.918	918.096	99.543	2.089	290.277	3.365	90.982	4.179	294.174	3.68	90.267	6.153
2021-02-09 03:00:00	-0.125219	98.1917	98.5792	100	100	100	2.91433	2.69354	2.54458	2.35562	2.91746	2.23147	0	9642.24	-14.0446	-26.4823	-201.924	26.9855	9.93432	9525.13	-14.1086	-26.5924	-203.12	21.9394	9.61909	9878.19	-13.7661	-25.9647	-198.583	29.1114	9.13442	9921.31	-13.8234	-26.0739	-198.417	30.1784	10.1749	3.408	918.539	97.713	2.96	290.066	3.758	89.89	5.674	291.576	3.863	92.52	7.292
2021-02-09 04:00:00	-0.106983	97.8458	98.0083	100	100	100	3.31825	3.17183	3.14446	2.96796	3.48175	3.00042	0	9695.79	-13.7929	-26.0098	-198.238	26.1719	9.84087	9554.92	-13.7512	-25.9267	-197.825	23.543	9.58813	9901.38	-13.352	-25.1941	-192.621	31.2938	8.93216	9979.06	-13.4685	-25.4105	-193.328	30.2407	9.95581	3.619	919.041	98.513	2.485	303.033	3.792	93.2	5.246	301.45	3.825	95.98	5.691
2021-02-09 05:00:00	-0.194215	98.9458	98.8542	100	100	100	3.29612	3.14487	3.15075	2.978	3.50113	2.78699	0	9819.36	-13.5216	-25.5022	-194.078	26.1886	9.93922	9584.71	-13.3938	-25.261	-192.53	25.1466	9.55716	9924.56	-12.938	-24.4235	-186.658	33.4762	8.7299								919.251	99.9	2.488	292.615	3.953	93.922	4.528	289.935	3.995	96.917	5.312
2021-02-09 06:00:00	3.29683	98.7667	98.9625	100	100	100	3.18467	2.91962	2.69892	2.46892	2.991	1.88255	0	9942.92	-13.2503	-24.9945	-189.918	26.2053	10.0376	9614.5	-13.0364	-24.5953	-187.236	26.7501	9.52619													3.828	919.697	99.843	2.567	305.51	4.042	92.213	5.076	297.9	4.098	95.138	5.94
2021-02-09 07:00:00	91.4581	98.2083	98.75	100	100	100	2.48387	2.24596	1.89938	1.588	2.19229	1.73178	0	10066.5	-12.979	-24.4868	-185.759	26.2219	10.1359																			3.419	920.732	97.908	2.294	281.492	4.187	89.512	3.403	283.202	4.42	90.272	4.356
2021-02-09 08:00:00	256.418	96.7792	96.775	100	100	100	4.68383	4.70787	4.36033	4.10671	4.89271	4.15975	0	10190.1	-12.7077	-23.9792	-181.599	26.2386	10.2343																				920.635	99.9	1.679	268.588	3.905	97.723	3.018	244.393	4.39	91.83	3.414
2021-02-09 09:00:00	369.501	94.125	93.0875	99.6	98.1417	97.5375	5.82021	5.96875	6.13658	6.04704	6.6145	6.29924	0																									5.72	920.794	97.297	3.145	263.145	4.677	98.4	4.725	263.167	4.11	99.838	4.09
2021-02-09 10:00:00	473.381	84.6988	83.6587	89.6417	88.55	88.2042	7.91704	8.11796	8.55063	8.343	8.72133	8.67381	0																									7.165	921.291	84.41	3.238	271.969	6.032	86.622	4.449	272.438	5.757	88.667	4.977
2021-02-09 11:00:00	528.94	76.5525	76.1508	79.6992	79.3208	78.2708	9.24	9.26542	9.96417	9.72208	10.5167	10.5406	0																									8.235	921.608	76.352	2.438	262.546	7.17	78.748	3.379	266.921	6.782	82.063	3.624
2021-02-09 12:00:00	378.336	69.3508	68.2804	71.1383	71.8892	69.1371	8.91125	9.10583	9.8175	9.67792	10.4938	10.4655	0																									8.367	921.888	64.128	2.069	217.6	7.297	65.763	2.463	200.869	6.945	67.178	2.773
2021-02-09 13:00:00	322.992	56.9208	56.0538	59.4971	60.2987	57.5696	9.63583	9.78875	10.4821	10.1692	11.2183	10.9333	0																									9.228	922.05	52.138	2.692	235.439	8.268	53.45	3.508	233.362	7.975	53.833	3.326
2021-02-09 14:00:00	187.821	67.12	66.3683	67.9163	68.815	67.2583	9.39125	9.46208	10.2112	9.935	10.635	10.0341	0																									9.105	922.047	63.552	1.683	245.876	8.215	65.105	2.144	237.893	7.982	65.437	2.19
2021-02-09 15:00:00	138.194	71.0246	70.7208	72.1825	72.7992	71.4521	8.67754	8.65325	9.45875	9.255	9.88833	9.29322	0																									8.497	922.016	65.755	2.06	172.015	7.627	67.133	2.689	169.927	7.35	68.145	2.749
2021-02-09 16:00:00	23.2219	79.0529	78.8879	80.2963	82.5179	80.8962	6.65308	6.65246	6.83333	6.52904	7.28558	6.57925	0																									7.062	921.967	73.337	3.131	162.318	6.695	73.83	4.572	165.621	6.465	75.925	4.702
2021-02-09 17:00:00	-0.235317	86.075	86.3417	88.2417	90.2917	90.1625	6.14767	6.03675	6.08908	5.79304	6.43483	5.87631	0																									6.637	921.789	81.078	1.894	182.492	6.368	80.73	3.923	179.969	6.215	81.943	4.561
2021-02-09 18:00:00	-0.372501	86.5208	86.625	89.3333	89.6667	90.5167	5.91979	5.87483	6.02096	5.83808	6.34396	5.8512	0																									6.347	921.458	81.537	1.595	101.705	6.138	79.638	2.854	124.31	6.037	79.69	3.571
2021-02-09 19:00:00	-0.329965	87.9667	88.1667	90.2042	90.7208	91.6833	5.79387	5.73371	5.97017	5.77088	6.29504	5.78942	0.372891																									6.175	921.449	84.637	2.269	97.229	5.807	83.002	3.853	98.508	5.643	84.932	4.385
2021-02-09 20:00:00	-0.412704	98.4792	98.2708	98.5667	99.2458	99.3708	4.90167	4.88254	5.21629	5.07475	5.69721	5.28455	1.11867																										921.183	99.865	2.14	74.201	5.063	97.943	3.832	82.326	5.014	99.665	4.306
2021-02-09 21:00:00	0.104523	100	99.9958	100	100	100	5.14471	5.11229	5.41983	5.28608	5.85717	5.4348	1.67801																										920.729	99.9	2.368	63.734		99.9	3.978	75.577		99.9	4.27
2021-02-09 22:00:00		100	100	100	100	100	5.57967	5.51954	5.82758	5.68783	6.27354	5.83866	0.559336																										920.28	99.9	1.96	70.802		99.9	3.184	86.055		99.9	3.648
2021-02-09 23:00:00		100	100	100	100	100	5.88713	5.81442	6.16004	5.99754	6.55213	6.13815	0.186445																										919.781	99.9	2.041	128.021		99.9	3.371	138.372		99.9	4.704
2021-02-10		100	100	100	100	100	6.16825	6.1015	6.41942	6.25496	6.80308	6.35398	0.372891																										919.33	99.9	1.265	137.452		99.9	2.324	142.076		99.9	3.631
2021-02-10 01:00:00		100	100	100	100	100	6.21721	6.15254	6.45958	6.27738	6.81021	6.35658	0.745782																										918.903	99.9	1.134	173.811	5.4	99.893	2.469	170.169		99.9	3.744
2021-02-10 02:00:00	-0.207818	97.6	97.7042	99.5792	99.8333	99.95	4.26896	4.22429	4.54162	4.29338	4.80354	4.47765	0.372891																									4.754	918.766	92.045	2.079	267.579	4.573	87.788	3.65	262.248	4.498	87.923	4.385
2021-02-10 03:00:00	-0.201522	95.3583	95.7542	99.4208	99.3	99.7833	3.47579	3.35304	3.37471	3.16254	3.6775	3.25052	0																									4.055	918.428	90.038	4.498	314.51	4.298	82.723	8.849	312.281	4.563	80.038	11.141
2021-02-10 04:00:00	-0.20322	91.3875	92.4292	98.1792	97.4375	98.7792	3.51863	3.30196	3.05221	2.79358	3.15717	2.35101	0																									4.295	917.99	83.013	3.563	307.183	4.708	75.522	6.441	310.582	5.018	71.645	7.962
2021-02-10 05:00:00	-0.214196	88.2875	89.125	94.8792	94.2042	94.2708	3.33804	3.17233	3.04004	2.82071	3.40379	2.62171	0																									3.872	917.753	80.665	2.842	329.718	4.358	71.35	5.269	320.102	4.782	65.838	7.228
2021-02-10 06:00:00	3.1546	83.9167	84.75	90.6542	89.9708	89.8375	3.57142	3.39504	3.19192	2.967	3.57479	2.5847	0																									4.075	917.699	76.103	4.499	287.977	4.412	69.522	7.515	289.756	4.547	66.86	8.033
2021-02-10 07:00:00	85.922	75.8129	76.565	83.775	82.7208	83.3279	4.82871	4.71413	4.27421	4.08975	4.58579	3.19084	0																									5.02	917.701	68.278	4.489	284.597	4.93	64.417	7.459	292.674	4.905	63.02	8.406
2021-02-10 08:00:00	125.522	75.0817	75.4508	80.1358	80.5221	79.5529	5.07046	5.04333	5.12579	4.87725	5.52862	4.61919	0																									5.3	917.863	68	4.348	297.016	4.897	65.403	7.419	300.65	4.762	64.628	8.662
2021-02-10 09:00:00	381.598	68.0979	67.3729	72.5983	73.0833	72.4771	7.09817	7.32133	7.38421	7.14921	7.78429	6.66066	0																									6.75	918.611	62.702	3.832	283.821	5.775	63.138	6.793	287.229	5.442	63.538	8.094
2021-02-10 10:00:00	487.153	63.3429	62.435	66.1396	67.3196	66.2812	8.97875	9.24083	9.64333	9.29	9.84042	9.53708	0																									8.273	919.368	58.98	2.998	291.504	7.097	60.417	4.815	303.513	6.697	61.468	5.27
2021-02-10 11:00:00	528.693	60.6854	60.3438	63	63.6296	62.3754	9.3725	9.52417	10.0512	9.94333	10.6408	10.547	0	9370.19	-11.9537	-22.5761	-164.199	31.0689	16.4092													8341.88	-12.4733	-23.5476	-172.864	30.0959	15.5166	8.993	920.295	55.475	3.973	271.873	7.673	57.01	5.472	274.351	7.183	58.115	6.252
2021-02-10 12:00:00	514.205	58.2921	57.6358	59.9571	60.525	58.4304	10.0071	10.2117	10.7825	10.6225	11.6704	11.9718	0	9305.09	-11.9411	-22.5556	-164.122	32.6831	16.3223													8187.66	-12.4476	-23.5003	-172.423	30.5524	15.58	9.612	920.852	53.075	4.724	295.63	8.288	54.862	7.513	293.426	7.793	55.945	8.396
2021-02-10 13:00:00	444.516	55.0621	54.2629	56.1821	56.4946	54.0887	10.2829	10.4754	11.0996	10.9079	12.2696	12.0853	0	9099.89	-11.9427	-22.5611	-164.278	34.0165	16.2107													7890.04	-12.4224	-23.4552	-172.176	31.6768	15.4651	10.018	921.599	49.48	4.532	296.741	8.732	50.972	6.972	297.68	8.27	51.647	7.766
2021-02-10 14:00:00	330.886	49.785	49.6604	51.8479	51.8904	49.4046	10.3212	10.2642	10.7442	10.5554	12.0758	11.6539	0	8457.08	-11.9885	-22.6477	-165.159	34.4732	16.0223													7592.71	-12.3997	-23.4138	-171.971	32.2613	15.3389	10.022	921.786	44.637	4.812	312.302	8.922	45.503	8.192	308.944	8.487	45.7	9.036
2021-02-10 15:00:00	187.99	49.7629	49.5037	51.6042	51.7046	50.4742	9.61875	9.57667	10.0038	9.77042	10.8921	10.0355	0	7814.26	-12.0343	-22.7343	-166.04	34.9299	15.8339													7298.85	-12.4079	-23.418	-172.268	26.2617	15.0759	9.575	921.774	44.208	4.771	315.085	8.76	44.54	7.776	309.246	8.37	44.597	9.051
2021-02-10 16:00:00	40.5612	54.7508	54.3792	57.4958	57.5017	57.1742	8.14862	8.09571	8.07767	7.8765	8.56521	6.99475	0	7557.58	-11.9603	-22.5875	-165.312	30.5523	15.3877													7004.99	-12.416	-23.4222	-172.565	20.2621	14.8129	8.42	921.77	48.178	5.172	325.001	7.99	47.563	8.993	322	7.735	47.175	10.529
2021-02-10 17:00:00	0.383922	58.5171	58.435	61.6396	61.4504	61.6271	6.88563	6.73042	6.75488	6.55604	7.06408	5.39027	0	7339.43	-11.8743	-22.4173	-164.423	25.6921	14.9156													7032.83	-12.1993	-23.0173	-169.458	20.9242	14.6805	7.397	922.249	51.243	5.065	304.116	7.295	49.745	9.108	302.379	7.138	49.437	10.488
2021-02-10 18:00:00	-0.306703	64.1717	64.2196	67.6875	67.8554	66.9513	5.90313	5.72154	5.64363	5.37175	6.08613	4.60741	0	7321.12	-11.7182	-22.1244	-162.436	25.4738	14.5594													7172.11	-11.9046	-22.4708	-165.173	23.8941	14.5935	6.58	922.782	56.132	4.722	300.974	6.61	54.463	8.743	299.777	6.5	54.355	9.853
2021-02-10 19:00:00	-0.29809	66.8867	67.0929	71.025	71.0463	70.5779	5.52783	5.34096	5.14008	4.89396	5.54821	3.97277	0	7449.84	-11.5105	-21.7412	-159.641	28.6712	14.2883													7166.7	-11.6457	-21.9872	-161.35	24.667	14.5473	6.123	923.929	59.248	3.947	275.745	6.16	57.555	7.126	275.606	6.162	56.932	8.026
2021-02-10 20:00:00	-0.229031	62.7025	62.8192	66.5904	66.3008	66.2704	5.92	5.73796	5.65729	5.45121	6.02983	4.29427	0	7484.67	-11.3161	-21.38	-156.897	30.4563	14.1435													6952.59	-11.4386	-21.5945	-158.196	22.271	14.5598	6.418	925.042	55.068	3.446	287.884	6.288	53.477	6.394	287.561	6.193	52.685	8.213
2021-02-10 21:00:00	-0.242615	62.1925	62.15	65.24	64.9508	65.4617	5.35454	5.23304	5.27475	5.04192	5.54817	4.00404	0	7226.45	-11.1628	-21.0878	-154.31	27.834	14.393													6756.99	-11.2579	-21.2517	-155.421	20.0459	14.5923	5.792	925.911	54.882	5.6	314.486	5.558	54.003	10.561	309.569	5.41	53.823	12.692
2021-02-10 22:00:00		66.265	66.4375	69.6704	69.7958	70.3762	4.49208	4.31742	4.21567	3.92988	4.36817	2.88646	0	6968.24	-11.0096	-20.7957	-151.723	25.2117	14.6424													6786.13	-11.3981	-21.5142	-157.248	19.8947	14.866	5.018	926.737	58.613	5.733	333.072	4.74	58.305	10.469	324.669	4.555	58.737	12.81
2021-02-10 23:00:00		68.9292	69.4958	74.2417	75.6379	76.7871	3.89058	3.62321	3.13662	2.57629	2.86375	1.20092	0	6941.35	-11.4597	-21.6349	-158.272	22.8605	14.8068													6815.27	-11.5383	-21.7767	-159.074	19.7435	15.1397	4.61	927.468	60.557	2.396	304.974	4.457	59.887	4.611	309.795	4.29	60.327	6.624
2021-02-11		70.0808	70.5304	74.7704	74.9979	74.9646	3.56562	3.35075	3.085	2.79233	3.38458	1.74296	0	6937.51	-11.97	-22.5869	-165.732	20.5364	14.9627													6748.22	-12.3249	-23.2426	-170.816	16.0388	15.1255	4.18	928.425	62.01	1.684	264.373	4.367	59.305	2.973	284.923	4.233	59.387	3.799
2021-02-11 01:00:00		68.0387	68.1567	71.545	71.3679	71.6096	3.72754	3.59871	3.54287	3.30854	3.86492	2.32347	0	6898.97	-12.5778	-23.7222	-174.963	18.9317	14.8142													6647.89	-13.3351	-25.125	-185.988	11.1045	15.0117	4.213	929.343	60.41	5.208	303.947	4.158	58.785	8.568	303.125	4.025	58.838	9.759
2021-02-11 02:00:00	-0.052167	70.0408	70.1546	73.3192	72.9975	73.0954	3.25733	3.12804	3.115	2.87904	3.48254	2.00138	0	6834.93	-13.2573	-24.9922	-185.496	17.8559	14.4421													6570.68	-13.9948	-26.3527	-196.035	7.14784	14.7861	3.733	929.776	62.577	5.779	327.358	3.528	61.757	9.908	323.218	3.405	61.857	10.992
2021-02-11 03:00:00	-0.092596	70.3942	70.415	73.3312	72.8283	73.5008	3.04871	2.93125	3.00362	2.7805	3.26096	1.88792	0	6756.9	-13.8198	-26.0422	-194.181	16.2636	14.1561													6526.77	-14.1496	-26.6374	-198.7	4.59939	14.3995	3.452	929.694	63.16	5.591	314.395	3.227	62.45	10.15	307.998	3.113	62.402	12.364
2021-02-11 04:00:00	-0.211252	70.3462	70.3462	73.2325	72.7325	73.4688	2.78717	2.68321	2.73925	2.506	2.99642	1.62766	0	6635.34	-14.0182	-26.4073	-197.121	13.065	14.1379													6473.35	-14.312	-26.937	-201.469	2.36665	14.0274	3.222	930.058	62.99	6.289	317.028	3.005	62.217	11.076	311.599	2.92	61.988	13.978
2021-02-11 05:00:00	-0.206792	68.8304	68.8717	71.9017	71.405	72.1058	2.82708	2.69796	2.71942	2.49912	2.98942	1.50419	0	6513.79	-14.2166	-26.7725	-200.06	9.86636	14.1197													6305.19	-14.5663	-27.4153	-205.492	3.93869	13.8308	3.258	930.145	61.283	5.221	310.753	3.175	59.762	9.822	311.231	3.225	58.668	12.155
2021-02-11 06:00:00	6.09581	66.8121	66.8812	70.2017	69.7512	70.3592	2.89387	2.74938	2.69037	2.47121	2.95621	1.37267	0	6370.62	-14.3907	-27.0968	-202.504	9.2727	14.2698													6137.04	-14.8207	-27.8936	-209.514	5.51074	13.6341	3.303	930.2	59.147	5.575	319.136	3.442	56.405	10.376	317.654	3.675	54.112	11.935
2021-02-11 07:00:00	122.983	63.3104	63.2004	67.8592	67.6108	67.9571	3.51796	3.47154	3.06738	2.80538	3.34096	1.84261	0	6225.32	-14.5623	-27.417	-204.899	8.93665	14.4365													5905.07	-15.0511	-28.3221	-212.718	4.44141	13.8591	3.513	930.444	57.068	5.126	307.284	3.243	55.427	9.724	310.419	3.455	52.767	11.1
2021-02-11 08:00:00	284.536	54.1879	53.425	56.9346	56.9646	56.4904	5.28275	5.40771	5.40654	5.10558	5.87917	4.14156	0	6022.55	-14.6467	-27.5795	-205.302	11.5281	15.3341													5651.07	-15.2732	-28.7335	-215.639	2.46011	14.2296	5.137	930.812	48.363	4.67	317.319	4.332	48.233	8.695	317.087	4.225	46.453	10.324
2021-02-11 09:00:00	407.937	45.7192	44.5467	46.8421	46.9496	46.5892	7.2655	7.54792	7.9575	7.74533	8.33612	7.07995	0	5777.57	-14.667	-27.6263	-204.242	16.2695	16.7683													5603.09	-15.1153	-28.4386	-212.968	2.73849	14.5404	6.99	931.237	40.57	5.716	310.023	5.813	41.475	10.348	313.992	5.427	40.872	11.708
2021-02-11 10:00:00	505.529	41.2342	40.1075	41.3233	41.7496	41.6613	9.12588	9.32208	10.2358	10.0071	10.3904	10.0982	0	5778.86	-14.4764	-27.2775	-200.475	20.4604	17.7445													5851.88	-14.4098	-27.1262	-202.244	6.27201	14.7653	8.839	931.49	33.729	4.437	310.918	7.506	34.555	7.574	314.861	7.123	33.803	8.892
2021-02-11 11:00:00	545.972	55.8021	54.5625	54.9504	54.6471	54.1887	7.75638	7.94963	8.92708	9.00208	9.57958	9.52601	0	6546.48	-13.6295	-25.6978	-188.287	22.9381	17.2954													6058.11	-13.748	-25.8955	-192.08	9.76299	15.0835
2021-02-11 12:00:00	526.149	48.8875	47.7854	48.9667	48.7342	47.8371	9.15792	9.31792	10.1946	10.2067	10.9296	11.2729	0	7314.1	-12.7826	-24.1181	-176.098	25.4157	16.8463													5753.44	-13.6116	-25.646	-188.645	12.7433	16.5228
2021-02-11 13:00:00	462.75	35.6342	34.7354	36.3358	36.1521	34.8675	11.1742	11.3204	12.1367	12.035	13.1308	12.4273	0	6911.16	-12.6705	-23.9017	-174.07	21.8926	17.1442													5448.76	-13.4752	-25.3965	-185.21	15.7237	17.962
2021-02-11 14:00:00	249.29	43.0812	42.4967	43.5962	43.4179	42.2392	9.43792	9.40417	10.1438	10.0429	11.0779	10.6505	0	6392.31	-12.6311	-23.8203	-173.047	17.7754	17.5159													5518.8	-13.1733	-24.8325	-180.752	16.3064	17.9084
2021-02-11 15:00:00	174.547	45.6517	45.2233	46.7392	46.4696	45.575	8.82083	8.66704	9.17333	9.081	9.85792	9.2643	0	5938.02	-12.5743	-23.7098	-171.958	15.5349	17.7206													5718.27	-12.8142	-24.16	-175.94	16.061	17.3392
2021-02-11 16:00:00	38.6035	41.9429	41.455	44.1592	44.1792	43.5058	8.06738	7.97525	7.96858	7.74283	8.39325	6.79585	0	5531.06	-12.5047	-23.5779	-170.82	14.6704	17.8028													5537.74	-12.6952	-23.9378	-174.236	16.3777	17.2669
2021-02-11 17:00:00	0.141219	39.145	38.82	41.5358	41.3813	41.4579	7.13079	6.95212	6.93754	6.72788	7.20029	5.30843	0	5136.32	-12.4831	-23.5334	-170.291	12.5042	17.9766													4810.85	-12.9213	-24.3632	-176.997	17.5025	17.909	7.45	933.243	31.867	4.886	307.023	7.475	29.567	8.725	306.673	7.55	26.375	10.478
2021-02-11 18:00:00	-0.321634	37.01	36.615	39.0908	38.7837	39.6154	6.61813	6.47213	6.50396	6.33488	6.65767	4.76058	0	4779.49	-12.6104	-23.7603	-171.648	6.29759	18.4352													4141.42	-13.1261	-24.7477	-179.541	18.1771	18.4411	7.038	933.371	31.415	4.172	301.025	7.302	28.028	8.57	305.17	7.557	23.637	9.864
2021-02-11 19:00:00	-0.415685	42.6912	42.7133	45.63	46.6788	46.6396	4.86688	4.61137	4.35067	3.88946	4.47558	2.88937	0	4422.67	-12.7377	-23.9873	-173.004	0.0909484	18.8937													4157.69	-13.0752	-24.6439	-179.49	13.4784	17.6605	5.455	933.586	36.802	1.425	260.8	5.872	32.078	3.64	275.631	6.368	26.167	5.723
2021-02-11 20:00:00	-0.38438	46.095	46.6146	51.1987	53.4729	55.6596	3.58492	3.162	2.38863	1.73067	2.06796	0.581026	0	4594.1	-12.6679	-23.8638	-173.276	4.02055	17.6344													4173.96	-13.0244	-24.54	-179.44	8.77963	16.88	4.43	934.044	39.167	1.11	278.141	5.25	33.37	3.107	276.324	6.043	25.258	3.852
2021-02-11 21:00:00	-0.068665	49.8875	50.355	54.845	56.3713	58.1571	2.78058	2.47063	1.91613	1.42679	1.82129	-0.024465	0	4817.41	-12.5787	-23.7059	-173.441	8.94554	16.2064													4371.2	-12.9123	-24.3317	-178.58	9.60384	16.0741	3.702	934.285	42.07	2.148	298.912	5.393	29.643	3.605	293.924	6.098	21.658	4.528
2021-02-11 22:00:00		51.9867	52.5308	56.2508	58.1896	61.92	2.94367	2.55221	1.85517	1.16604	1.19433	-0.430669	0	5128.11	-12.4299	-23.4344	-172.304	12.8782	15.1714													4630.79	-12.7792	-24.0875	-177.441	12.3306	15.2595	3.772	934.548	44.827	2.183	337.013	4.517	41.667	2.783	346.312	4.562	42.645	2.74
2021-02-11 23:00:00		61.4208	62.0175	65.5962	67.9404	74.7113	2.11463	1.83908	1.35708	0.765292	0.339333	-0.376145	0	5502.87	-12.2374	-23.0798	-170.214	16.0837	14.4244													4844.34	-12.7363	-24.0112	-177.338	14.5167	14.7519	2.738	934.89	54.333	1.82	44.566	3.35	49.748	3.711	44.818	3.577	46.38	4.444
2021-02-12		58.1583	59.4971	64.6912	67.5717	74.4729	2.35504	1.83283	1.04246	0.198542	-0.298458	-1.19533	0	5800.83	-12.1226	-22.8696	-169.016	18.6724	13.9412													4991.89	-12.8228	-24.1758	-178.722	15.9275	14.6844	3.302	935.465	49.667	1.672	27.879	3.395	48.07	2.356	55.302	3.457	45.73	3.282
2021-02-12 01:00:00		61.4842	62.9267	68.4767	71.1129	77.9608	2.13221	1.60062	0.675042	-0.134833	-0.568917	-1.50525	0	5860.72	-12.2487	-23.1071	-170.581	19.3487	14.2755													5129.08	-12.9104	-24.3417	-180.075	16.9779	14.659	2.92	935.839	53.495	1.397	18.151	2.892	52.917	1.811	49.277	3.243	50.207	1.926
2021-02-12 02:00:00	-0.183965	62.0058	63.5604	69.4954	72.1338	78.3158	2.32229	1.82529	1.06321	0.419958	0.169542	-0.781269	0	5920.61	-12.3748	-23.3446	-172.147	20.025	14.6098													5142.73	-13.0112	-24.5245	-181.063	13.7339	15.1338	3.097	936.107	53.715	1.858	23.582	3.552	50.243	2.838	46.482	4.18	45.658	3.5
2021-02-12 03:00:00	-0.026548	56.3508	56.7129	61.1858	62.4908	71.33	3.60688	3.42658	3.17638	2.82429	2.45167	1.5837	0	6854.57	-11.5849	-21.8568	-164.074	16.3256	10.7798													5156.39	-13.1121	-24.7073	-182.05	10.49	15.6085	3.935	936.413	49.755	1.901	48.217	4.442	46.207	3.997	50.046	4.568	46.525	5.344
2021-02-12 04:00:00	-0.045053	67.4421	68.3892	71.5046	75.4654	83.7387	4.04354	3.79154	3.61983	3.25442	3.27025	2.64032	0	7874.33	-10.705	-20.1996	-155.056	12.1967	6.54107													6505.23	-11.9626	-22.5561	-166.072	12.5789	14.3769	4.51	936.16	59.988	1.637	42.272	4.555	61.605	3.496	45.642	4.48	68.96	4.252
2021-02-12 05:00:00	-0.081347	82.9667	83.2987	84.0629	86.25	90.6833	4.76863	4.59096	4.54283	4.25592	4.23129	3.42103	0	8837.67	-10.0275	-18.9286	-146.008	12.1634	5.42078													8313.87	-10.3825	-19.6011	-144.251	16.5044	12.5578	5.095	936.013	78.738	1.398	31.15	4.897	82.24	2.524	51.728	4.712	90.972	2.608
2021-02-12 06:00:00	1.79025	90.1625	90.2083	91.0417	92.2583	94.9958	4.90229	4.77408	4.93075	4.71288	4.91175	4.16448	0	9759.71	-9.49811	-17.9403	-136.938	15.1291	6.58408													9587.22	-9.36453	-17.6998	-129.844	20.588	11.7552	5.108	935.832	88.098	1.759	44.508	5.06	88.758	2.792	58.176	4.835	95.208	3.09
2021-02-12 07:00:00	21.5567	92.9333	92.975	94.2083	95.325	97.5917	5.20662	5.08858	5.27725	5.11021	5.45533	4.80035	0	10459.9	-9.10565	-17.2091	-129.999	18.0777	7.67335													10092	-9.15349	-17.3115	-126.08	24.8985	12.4121	5.465	936.147	94.553	1.704	51.698	5.14	90.958	2.952	60.439	4.908	98.207	3.265
2021-02-12 08:00:00	65.268	89.8208	89.6917	91.2625	91.3958	92.9458	5.6715	5.65562	6.07375	5.93758	6.4945	5.86809	0	10471.7	-9.13813	-17.2754	-129.671	20.9731	8.53289													10544	-8.96941	-16.9732	-122.783	28.8461	13.0024	5.755	936.22	88.987	1.679	64.844	5.33	87.723	2.831	69.978	5.157	92.033	3.402
2021-02-12 09:00:00	66.5967	86.0042	85.8958	86.9083	86.8375	87.5292	5.98163	5.966	6.53771	6.42475	7.00696	6.35618	0	10483.4	-9.17061	-17.3418	-129.342	23.8684	9.39242													10363.1	-9.1083	-17.2333	-125.072	28.4466	12.7944	6.075	936.235	83.013	1.684	86.023	5.5	84.138	2.897	94.126	5.162	88.613	3.602
2021-02-12 10:00:00	101.109	82.8	82.4458	83.4208	83.1958	83.6958	6.28008	6.29075	6.936	6.83442	7.50162	6.88142	0	10495.2	-9.20309	-17.4082	-129.014	26.7638	10.252													10182.2	-9.24719	-17.4934	-127.36	28.047	12.5865	6.335	936.529	79.015	1.971	91.017	5.622	80.285	2.968	99.171	5.357	83.433	3.855
2021-02-12 11:00:00	133.289	81.6958	81.1162	81.5783	81.3025	81.5321	6.67338	6.77238	7.55242	7.43963	8.17863	7.69851	0	10507	-9.23557	-17.4746	-128.686	29.6591	11.1115													10001.3	-9.38608	-17.7535	-129.649	27.6474	12.3785	6.632	936.568	78.323	2.566	92.178	5.802	80.112	3.637	93.757	5.472	83.162	4.184
2021-02-12 12:00:00	138.466	78.5817	77.8421	77.8042	77.3608	77.1917	7.14183	7.31283	8.18492	8.07933	8.90583	8.52352	0	10483.5	-9.29209	-17.5854	-128.776	32.1266	11.9069													9820.42	-9.52496	-18.0136	-131.938	27.2479	12.1706	7.103	936.854	74.917	2.433	80.757	6.233	76.783	3.151	80.423	5.892	79.257	3.433
2021-02-12 13:00:00	58.4431	78.3125	77.8525	78.2662	77.9067	78.0983	6.81463	6.87858	7.47262	7.41804	7.92721	7.5	0	10160.2	-9.5535	-18.074	-132.436	30.9473	12.1561													9639.51	-9.66385	-18.2736	-134.227	26.8483	11.9626	6.948	936.858	73.58	2.627	98.054	6.242	74.458	3.522	96.021	5.908	75.803	3.899
2021-02-12 14:00:00	42.3901	79.3033	78.9904	79.7638	79.7192	80.2204	6.33154	6.38046	6.86383	6.80425	7.19267	6.67284	0	9836.79	-9.81491	-18.5626	-136.096	29.768	12.4053													9910.73	-9.62237	-18.196	-133.357	27.0088	12.2114	6.513	936.329	74.452	2.538	117.764	5.873	75.242	3.614	116.673	5.572	77.215	3.993
2021-02-12 15:00:00	16.5708	91.9542	91.6917	90.2292	91.3417	92.1208	4.98429	5.003	5.53763	5.47675	5.87688	5.557	0.186445	10216.2	-9.7764	-18.4905	-135.239	29.8678	12.685													10211.6	-9.56903	-18.0963	-132.28	27.2062	12.4901	5.438	935.753	94.207	3.873	136.932	4.706	93.378	5.958	137.287	4.6	97.307	6.578
2021-02-12 16:00:00	4.76102	99.1542	98.6792	96.7083	98.6667	99.4333	4.28983	4.284	4.76021	4.71462	5.13725	4.93422	0.559336	10803.3	-9.64921	-18.2526	-133.048	30.3459	12.9736													10514.2	-9.58153	-18.1219	-131.861	28.3589	13.1143		935.136	99.9	2.115	152.918		99.9	3.359	152.36		99.9	4.052
2021-02-12 17:00:00	-0.140598	100	99.9333	99.0333	99.9875	100	4.07637	4.04087	4.43738	4.38904	4.91333	4.6904	0.559336	11115.5	-9.68681	-18.3217	-133.213	29.5369	13.3612													10817.9	-9.63695	-18.2293	-131.87	30.1348	13.9639		934.768	99.9	0.969	85.935		99.9	1.522	98.15		99.9	2.092
2021-02-12 18:00:00	-0.406235	100	100	99.9792	100	100	3.89367	3.82033	4.19821	4.11654	4.67583	4.45922	1.11867	11075.7	-9.93538	-18.7837	-136.395	27.0802	13.8752													11015.5	-9.73795	-18.4215	-133.072	31.5349	14.2992		934.879	99.9	1.012	73.013		99.9	1.636	83.983		99.9	2.287
2021-02-12 19:00:00	-0.448554	100	100	100	100	100	3.81383	3.75154	4.13262	4.01733	4.62479	4.41017	0	11016.8	-10.175	-19.2291	-139.616	24.6437	14.2168													10929.2	-9.96087	-18.8406	-137.466	31.9295	13.2584		935.008	99.9	1.758	96.468		99.9	2.876	100.821		99.9	3.042
2021-02-12 20:00:00	-0.372053	100	100	100	100	100	3.57942	3.47679	3.86254	3.73046	4.30796	4.18725	0.186445	10795.4	-10.339	-19.5325	-143.167	22.3776	13.0931													10842.9	-10.1838	-19.2598	-141.86	32.3241	12.2177		935.173	99.9	1.546	68.006	3.654	99.457	2.555	59.327	3.678	97.333	3.335
2021-02-12 21:00:00	0	100	100	100	100	100	3.45408	3.28313	3.69054	3.50779	4.07017	3.97909	0.186445	10574	-10.503	-19.836	-146.719	20.1116	11.9694													10525.7	-10.517	-19.8827	-147.211	31.1997	11.8507	4.075	935.133	99.805	1.649	13.949	3.723	93.068	3.256	27.282	3.685	93.142	3.864
2021-02-12 22:00:00		100	100	100	100	100	3.33042	3.17225	3.51846	3.38871	3.91288	4.11409	0.186445	10496.7	-10.6581	-20.1315	-149.775	22.5664	11.277													10193.5	-10.8573	-20.5189	-152.624	29.9761	11.5277	4	935.086	99.843	1.18	40.965	3.678	94.373	2.644	39.804	3.593	97.645	3.5
2021-02-12 23:00:00		100	100	100	100	100	3.46667	3.31188	3.58983	3.44504	3.97058	4.06887	0.186445	10461.9	-10.8106	-20.4247	-152.686	26.415	10.7119													10096.1	-11.0414	-20.8623	-155.683	29.0134	11.2149	4.116	935.22	98.632	0.931	323.304	4.14	89.513	1.36	13.102	3.992	91.897	1.924
2021-02-13		100	100	100	100	100	3.51229	3.41025	3.65687	3.49679	4.0395	3.91012	0.186445	10372.3	-10.9184	-20.6291	-154.734	27.579	10.2988													10151.8	-11.1236	-21.015	-157.211	28.2207	10.9086		935.332	99.9	1.746	304.081	3.89	94.268	2.242	319.067	4.06	93.402	1.769
2021-02-13 01:00:00		99.325	99.3083	100	100	100	3.56008	3.41054	3.54208	3.36892	3.9465	3.64489	0	10212.8	-10.9692	-20.7201	-155.681	25.3135	10.0798													10166.2	-11.1623	-21.0873	-158.187	28.0138	10.5117	4.039	935.599	98.57	2.638	281.504	3.81	93.592	4.612	287.939	3.785	95.49	5.127
2021-02-13 02:00:00	-0.282091	99.5125	99.275	100	100	100	3.08275	2.93063	2.92721	2.73612	3.30217	2.83196	0	10053.5	-11.0178	-20.8076	-156.597	23.3548	9.86331													10070.9	-11.0851	-20.945	-157.687	29.3717	9.87259	3.94	935.804	99.87	3.409	276.292	3.565	94.693	4.86	278.581	3.553	98.643	5.453
2021-02-13 03:00:00	-0.275613	99.9958	99.975	100	100	100	2.20967	2.12075	2.25121	2.06204	2.56229	2.45225	0	9896.98	-11.0482	-20.8658	-157.258	23.9948	9.66853													9975.57	-11.0079	-20.8027	-157.188	30.7296	9.23349		935.783	99.9	2.098	310.406	2.6	99.835	3.012	311.737		99.9	3.884
2021-02-13 04:00:00	-0.187546	100	100	100	100	100	1.93892	1.88392	2.20113	2.04225	2.65725	2.79665	0	9740.43	-11.0786	-20.9239	-157.918	24.6347	9.47375													9655.58	-11.1448	-21.051	-159.149	26.1659	9.25881		935.663	99.9	0.831	32.125		99.9	1.087	76.534		99.9	0.892
2021-02-13 05:00:00	-0.343245	100	100	100	100	100	1.39225	1.3885	1.74687	1.57067	2.16271	2.44942	0	9399.26	-11.1853	-21.1219	-159.563	23.4387	9.41252													9321.02	-11.2956	-21.3246	-161.269	21.2181	9.32721		935.583	99.9	0.6	324.84		99.9	0.781	37.04	2.857	99.192	1.034
2021-02-13 06:00:00	1.64595	100	100	100	100	100	0.609042	0.560708	0.797333	0.603125	1.22388	1.30002	0	9003.71	-11.3146	-21.3611	-161.498	21.702	9.39063													9104.33	-11.3409	-21.4072	-161.922	19.9877	9.33537		935.684	99.9	2.19	257.479	1.55	99.758	3.203	265.543	3.056	91.468	2.883
2021-02-13 07:00:00	24.7709	100	100	100	100	100	0.732042	0.760958	1.20375	1.05121	1.58104	1.90261	0	8946.85	-11.3594	-21.4436	-161.861	20.9812	9.68734													8964.34	-11.3175	-21.3655	-161.62	21.1763	9.30433		935.787	99.9	1.443	24.112		99.9	2.143	20.622		99.9	2.142
2021-02-13 08:00:00	86.2996	100	100	100	100	100	1.37888	1.44371	1.99542	1.82808	2.43692	2.76282	0	9322.29	-11.2962	-21.3262	-160.219	21.5573	10.3907													8935.59	-11.2969	-21.3277	-161.278	21.5842	9.34386		935.703	99.9	0.915	183.959		99.9	0.912	81.932		99.9	1.281
2021-02-13 09:00:00	108.772	100	100	100	100	100	1.86558	1.96571	2.72587	2.46433	3.24592	3.45522	0	9678.89	-11.2419	-21.2255	-158.726	22.1564	11.0785													9203.68	-11.2839	-21.3001	-160.829	19.9088	9.57172		936.469	99.9	0.896	103.568		99.9	1.174	109.037		99.9	1.291
2021-02-13 10:00:00	179.901	100	100	100	100	100	2.69833	2.74971	3.65592	3.26875	3.92942	4.30562	0	9876.37	-11.2622	-21.2651	-158.486	22.95	11.6352													9471.77	-11.2708	-21.2725	-160.38	18.2334	9.79957		937.474	99.9	1.12	105.986		99.9	1.333	113.584		99.9	1.708
2021-02-13 11:00:00	157.622	99.9833	97.9667	100	98.2292	98.2292	3.66525	3.82821	4.80092	4.44725	5.10304	5.55623	0	10073.9	-11.2825	-21.3047	-158.246	23.7437	12.192													9603.14	-11.2763	-21.2882	-159.971	21.1248	10.3347	3.555	938.297	99.39	1.132	101.835	2.876	99.53	1.364	97.862		99.9	1.392
2021-02-13 12:00:00	161.989	96.6542	94.1333	100	94.4	94.3417	4.41204	4.60654	5.39938	5.34829	5.7905	6.08472	0	10209.9	-11.1481	-21.0556	-156.253	25.313	12.1919													9725.7	-11.2831	-21.3067	-159.564	24.3103	10.8896	4.195	939.162	94.6	1.207	111.242	3.41	96.085	1.36	111.13	3.309	99.703	1.416
2021-02-13 13:00:00	140.214	91.85	91.2042	97.2875	91.8917	92.5083	4.97479	5.06092	5.65992	5.70217	5.96892	6.11981	0	10327.9	-10.9682	-20.7215	-153.744	27.1105	12.0282													9822.04	-11.1834	-21.1245	-157.709	26.7943	11.287	4.818	939.604	90.313	1.433	151.191	3.972	91.573	1.613	161.515	3.612	96.808	1.7
2021-02-13 14:00:00	161.818	91.3667	90.2542	92.35	90.825	91.3958	4.97025	5.15229	5.93408	5.88146	6.19658	6.30837	0	10281.9	-10.8527	-20.5038	-152.139	26.521	11.8913													9901.36	-11.0147	-20.8119	-154.913	28.8225	11.5822	4.792	939.737	93.583	1.963	197.827	3.822	93.685	2.779	194.84	3.705	97.733	2.948
2021-02-13 15:00:00	70.3951	93.4125	92.3	92.7625	92.2792	93.0375	4.19042	4.32454	5.12992	5.00162	5.29537	5.46041	0	10026.5	-10.8193	-20.4345	-151.688	22.8842	11.7886													9831.96	-10.9148	-20.626	-153.087	29.559	11.9211	4.095	939.808	97.983	2.306	193.392	3.265	96.253	3.257	196.623	3.433	99.76	3.236
2021-02-13 16:00:00	9.91273	98.6292	97.5458	97.5208	97.4667	98.175	2.38317	2.46058	3.01871	2.86608	3.36338	3.50866	0	9736.7	-10.808	-20.4078	-151.474	19.937	11.7882													9365.99	-10.9987	-20.7782	-153.849	26.8512	12.3769		939.895	99.9	2.112	206.675	2.432	99.702	2.876	213.257		99.9	3.08
2021-02-13 17:00:00	-0.006942	98.375	97.7208	98.9167	98.6708	98.9375	1.39958	1.3175	1.56058	1.33787	1.93992	1.99271	0	9157.45	-10.9821	-20.7396	-153.267	22.7973	12.6493													8900.01	-11.0825	-20.9303	-154.61	24.1433	12.8327	1.655	940.254	99.278	2.924	239.908	1.455	96.478	4.439	236.93	1.433	99.687	4.626
2021-02-13 18:00:00	-0.314158	99.1667	98.5708	99.9625	99.8042	99.9667	0.979542	0.9	1.06625	0.84375	1.49446	1.40091	0	8578.21	-11.1562	-21.0713	-155.06	25.6575	13.5103													8637.2	-10.9704	-20.7177	-151.569	22.7493	14.1722		940.759	99.9	2.81	245.322	1.063	98.378	4.198	242.504		99.9	4.695
2021-02-13 19:00:00	-0.303178	99.2708	98.8708	100	100	100	0.79875	0.632167	0.590417	0.362833	1.08771	0.800169	0	8396.34	-10.9792	-20.7382	-151.553	25.0352	14.3531													8387.44	-10.8458	-20.4815	-148.284	21.4398	15.5686		941.168	99.9	3.025	268.341	1.168	96.608	5.046	266.052		99.9	6.027
2021-02-13 20:00:00	-0.143774	98.8833	98.8667	100	100	100	0.868708	0.656208	0.654208	0.411708	1.11387	1.08287	0	8331.16	-10.6991	-20.21	-146.489	23.3904	15.1906													8307.61	-10.6884	-20.1875	-145.17	22.1502	16.3302		942.088	99.9	2.5	280.75	1.317	94.407	4.247	273.562	1.189	99.113	4.86
2021-02-13 21:00:00	-0.312042	98.9333	99.0292	100	100	100	0.957125	0.776625	0.854625	0.576667	1.30871	1.39533	0	8350.9	-10.4979	-19.8303	-142.806	22.2373	15.8366													8338.04	-10.5096	-19.856	-142.168	24.1711	16.6798		943.007	99.9	1.631	282.611	1.164	95.577	2.927	270.401	1.217	99.38	3.737
2021-02-13 22:00:00		99.7333	99.5708	100	100	100	1.00404	0.894833	1.10308	0.89175	1.58479	1.81321	0	8478.82	-10.397	-19.6401	-140.882	21.7107	16.2387													8347.74	-10.3546	-19.5663	-139.458	24.7914	17.0724		943.878	99.9	0.951	54.778	1.01	99.71	1.36	99.638		99.9	1.465
2021-02-13 23:00:00		99.6625	99.5083	100	100	100	0.9505	0.835083	1.15546	0.950833	1.566	1.74158	0	8564.53	-10.2916	-19.4422	-138.824	21.591	16.7141													8302.28	-10.2629	-19.3884	-137.528	21.6837	17.579		944.656	99.9	1.007	182.065	0.965	96.62	2.24	180.6	0.981	98.928	3.078
2021-02-14		99.8042	99.5083	100	100	100	0.652458	0.612083	0.980042	0.798167	1.41992	1.69445	0	8295.71	-10.1489	-19.1804	-135.639	24.8887	17.8043													8256.82	-10.1711	-19.2104	-135.598	18.5761	18.0856		945.298	99.9	1.282	210.078	0.51	99.843	2.437	202.545		99.9	3.276
2021-02-14 01:00:00		97.7417	97.5042	99.7667	99.5958	98.7167	0.051542	-0.041208	0.303042	0.059458	0.754583	1.04846	0	8026.89	-10.0061	-18.9187	-132.455	28.1864	18.8945													7561.64	-9.95484	-18.8143	-130.236	23.8429	20.2776	0.363	945.905	94.07	1.462	182.806	-0.012	92.462	2.876	178.859	-0.382	96.332	3.277
2021-02-14 02:00:00	-0.174291	90.2667	91.1208	97.1375	96.9625	94.4083	-0.471333	-0.639708	-0.493083	-0.782667	0.014625	0.359254	0	7514.88	-10.087	-19.0667	-132.562	26.1418	19.9715													6824.95	-9.73061	-18.4042	-124.656	29.6448	22.5773	-0.04	946.639	82.238	2.038	175.866	-0.405	79.902	3.746	175.436	-0.67	80.74	4.368
2021-02-14 03:00:00	-0.349024	84.5333	86.9875	94.7208	95.8875	95.5708	-1.18475	-1.5095	-1.49225	-1.79833	-1.15512	-0.483501	0	6931.56	-10.2335	-19.3348	-133.634	22.5307	21.0447													6076	-9.7623	-18.4623	-122.823	28.8917	24.8748	-0.503	947.146	73.915	1.373	197.097	-0.597	70.668	2.563	187.865	-0.792	71.568	3.26
2021-02-14 04:00:00	-0.34951	75.3388	79.0058	92.3333	94.675	96.8958	-1.142	-1.63912	-1.89671	-2.25046	-1.65892	-0.984268	0	6490.75	-10.3874	-19.6228	-134.671	22.1649	22.3114													5319.1	-9.95984	-18.8238	-123.419	23.891	27.1709	-0.405	947.576	63.662	0.744	228.059	-0.7	61.313	1.183	181.805	-0.941	60.832	1.469
2021-02-14 05:00:00	-0.413303	69.8462	73.4379	89.0458	90.7958	93.575	-1.11592	-1.62804	-2.07963	-2.46008	-1.89842	-1.19857	0	6231.23	-10.5507	-19.9362	-135.665	25.9276	23.8243													4734.01	-10.1465	-19.1663	-124.401	19.67	28.9295	-0.417	948.167	58.927	0.681	134.902	-0.722	56.982	1.334	156.624	-0.989	57.188	1.882
2021-02-14 06:00:00	7.04629	70.0542	73.2525	85.9042	90.9583	92.1042	-1.48492	-1.94308	-2.33733	-2.75937	-2.25525	-1.24217	0	5979.87	-10.6854	-20.195	-136.156	29.1792	25.4045													4604.89	-10.3043	-19.4584	-126.405	17.5187	29.2617	-0.648	948.606	58.473	1.026	170.725	-0.85	57.163	2.052	168.069	-1.112	57.952	2.422
2021-02-14 07:00:00	77.1736	65.3792	67.0254	80.1363	81.9054	86.4146	0.216167	0.028042	-0.66275	-0.975542	-0.493292	-0.255725	0	5796.61	-10.5816	-19.9984	-132.44	28.1615	27.547													4475.76	-10.4621	-19.7505	-128.41	15.3674	29.5939	0.152	948.965	57.935	0.737	227.588	-0.477	57.327	0.811	173.522	-0.787	58.213	1.197
2021-02-14 08:00:00	168.838	67.5367	67.7254	73.1517	72.2042	72.3267	0.552833	0.624083	0.987917	0.7105	1.42358	1.3277	0	5613.34	-10.4778	-19.8018	-128.725	27.1439	29.6895													4735.87	-10.4317	-19.6962	-128.719	16.8174	28.8507	0.372	949.425	60.778	1.023	84.6	-0.343	61.527	1.679	86.601	-0.672	62.518	1.894
2021-02-14 09:00:00	136.653	67.9062	67.6492	71.0679	71.1192	70.7117	1.15367	1.29075	2.01392	1.7885	2.1315	2.16923	0	5568.37	-10.4271	-19.7053	-128.273	26.4163	29.3697													5020.61	-10.3894	-19.62	-128.92	18.4953	28.0394	0.812	950.055	61.173	1.922	124.295	0.008	62.082	2.345	119.92	-0.307	63.178	2.418
2021-02-14 10:00:00	144.789	64.7996	64.7179	67.4233	66.8921	66.7246	1.19717	1.32704	2.11871	1.96921	2.54354	2.6765	0	5563.87	-10.3919	-19.6381	-128.776	25.7737	28.3291													4734	-10.6742	-20.1486	-132.811	15.6254	28.3775	1.085	950.999	57.508	2.246	140.774	0.318	58.148	2.886	133.735	-0.027	58.855	2.969
2021-02-14 11:00:00	182.787	53.4892	53.5008	57.9592	56.8708	55.5754	1.82171	1.97892	2.83792	2.70975	3.11212	3.23188	0	5291.75	-10.4959	-19.8312	-130.36	24.7347	28.2894													4077.71	-11.1706	-21.0687	-139.09	9.81279	29.4593	1.583	951.754	46.282	1.786	139.85	0.798	46.43	2.454	138.535	0.51	46.232	2.716
2021-02-14 12:00:00	200.158	41.6925	41.2821	45.2592	44.8	45.1146	2.36304	2.58917	3.65204	3.49329	3.75988	3.86367	0	4679.49	-10.7767	-20.3551	-133.319	23.192	29.5217													3550.43	-11.5389	-21.7504	-143.792	4.98283	30.2112	2.155	952.766	36.225	2.018	154.917	1.268	35.932	2.589	154.793	0.957	35.283	2.713
2021-02-14 13:00:00	190.787	41.1054	40.3296	43.3508	43.2287	43.7433	2.59075	2.90738	4.02992	3.91938	3.98612	4.15133	0	4130.05	-11.0156	-20.8011	-135.792	22.1048	30.6166													3365.84	-11.5671	-21.7992	-144.306	2.76297	30.0872	2.432	953.265	35.845	2.15	161.605	1.577	35.8	3.155	164.725	1.257	35.153	3.368
2021-02-14 14:00:00	127.703	40.72	40.1675	43.1092	43.38	43.6437	2.53792	2.74771	3.64183	3.57812	3.80037	3.82344	0	4104.85	-10.9043	-20.5975	-134.215	24.8189	30.5648													3181.25	-11.5952	-21.8479	-144.82	0.543116	29.9631	2.473	953.269	35.183	2.224	158.079	1.678	34.952	2.88	160.753	1.385	34.328	3.12
2021-02-14 15:00:00	61.8577	44.0975	43.8446	46.7163	47.0521	46.5112	2.23975	2.40433	3.02608	2.98808	3.2905	3.21415	0	4079.64	-10.793	-20.3939	-132.638	27.5331	30.513													3337.45	-11.3541	-21.4067	-140.743	6.44571	30.5104	2.392	952.965	38.055	2.306	160.652	1.693	37.44	3.168	158.642	1.37	36.832	3.32
2021-02-14 16:00:00	15.3708	47.13	47.3829	51.42	53.26	52.9012	1.67983	1.71271	2.06904	1.97738	2.40221	2.42639	0	4472.81	-10.5619	-19.9572	-130.879	25.8487	28.7787													3515.2	-11.0958	-20.9345	-136.376	12.8619	31.1002	2.087	952.644	40.58	1.891	160.214	1.578	39.03	2.777	160.786	1.29	38.412	2.938
2021-02-14 17:00:00	0.193739	50.2404	52.0696	59.3417	63.8096	63.4071	1.09208	0.856333	0.898917	0.653125	1.22367	1.61688	0	4988.12	-10.2959	-19.4525	-129.067	22.8804	26.5533													3578.31	-10.9209	-20.6098	-134.128	14.7	30.7506	1.74	952.632	41.76	0.895	207.166	1.435	39.3	1.627	195.121	1.15	38.442	2.002
2021-02-14 18:00:00	-0.409795	50.4725	51.8529	60.2687	64.5354	64.7846	0.499792	0.174625	-0.153208	-0.466458	0.125917	0.234061	0	5188.49	-10.1569	-19.1866	-128.538	20.0684	24.9545													3567.27	-10.7997	-20.3805	-133.251	13.5773	29.7935	1.217	952.75	42.162	1.09	200.373	1.012	39.572	2.318	182.949	0.762	38.278	2.664
2021-02-14 19:00:00	-0.428226	52.7471	53.7671	61.3062	65.3367	67.6917	-0.143833	-0.468625	-1.21629	-1.58854	-1.00883	-1.26124	0	4988.92	-10.1793	-19.2238	-129.639	17.4547	24.1517													3584.77	-10.6708	-20.137	-132.166	12.5937	28.9301	0.64	952.952	44.722	1.351	173.067	0.438	43.455	3.092	167.048	0.167	43.042	4.043
2021-02-14 20:00:00	-0.364259	54.5792	55.6613	63.6229	67.16	69.4712	-0.418583	-0.7625	-1.66787	-2.05029	-1.35121	-1.84322	0	4818.09	-10.2033	-19.265	-130.755	15.4668	23.3652													3677.79	-10.5214	-19.8555	-130.53	11.9787	28.3147	0.368	953.306	46.387	1.693	149.551	0.203	45.283	3.134	149.01	-0.082	45.305	4.035
2021-02-14 21:00:00	-0.450897	55.3921	57.7792	64.6513	68.7013	76.0817	-0.545292	-1.28896	-2.03517	-2.49354	-2.24533	-2.10297	0	4885.87	-10.2398	-19.3394	-132.001	18.6745	22.7141													3770.8	-10.372	-19.5741	-128.894	11.3636	27.6993	0.293	953.591	47.11	1.538	151.494	0.005	46.968	2.856	155.52	-0.285	47.372	3.722
2021-02-14 22:00:00		57.825	60.09	66.0442	70.1725	79.1983	-0.924333	-1.59992	-2.29483	-2.93662	-2.99487	-2.80965	0	4953.65	-10.2762	-19.4139	-133.248	21.8821	22.0631													3824.09	-10.36	-19.5587	-128.783	15.1965	27.6867	0.063	953.87	48.843	0.888	130.047	-0.103	48.307	1.712	142.104	-0.34	48.797	2.512
2021-02-14 23:00:00		59.6104	61.0346	67.5938	72.0362	80.295	-1.161	-1.59379	-2.336	-3.00346	-3.21233	-3.41668	0	4989.33	-10.3835	-19.6137	-134.616	21.1472	22.2938													3874.87	-10.3566	-19.5599	-128.768	19.3096	27.712	-0.183	954.208	50.16	1.196	58.932		47.897	1.657	91.856	-0.263	48.068	2.096
2021-02-15		58.4825	59.5404	65.6417	68.5787	80.3846	-1.02438	-1.38413	-2.01783	-2.54446	-3.08537	-3.13262	0	5015.63	-10.5114	-19.8501	-136.019	19.2608	22.7819													3872.49	-10.3884	-19.6219	-129.081	20.5933	27.8943	-0.2	954.335	49.632	1.698	26.585	-0.105	47.23	2.6	53.175	-0.302	47.35	2.803
2021-02-15 01:00:00		58.325	59.5308	66.3396	71.3654	81.1142	-1.05067	-1.45729	-2.2225	-2.92242	-3.28417	-3.08596	0	5021.88	-10.6027	-20.0182	-136.872	17.4705	23.2735													3835.74	-10.4428	-19.723	-129.606	20.048	28.1781	-0.192	954.207	49.338	1.872	40.941	-0.028	46.925	3.006	62.208	-0.247	46.938	3.448
2021-02-15 02:00:00	-0.156135	58.1504	58.9896	65.0754	69.62	79.2592	-0.996333	-1.30967	-1.87563	-2.53408	-2.94596	-2.90014	0	5002.67	-10.6477	-20.0994	-137.026	15.8022	23.7695													3813.88	-10.4849	-19.8015	-130.005	19.7639	28.4076	-0.32	954.479	49.865	1.808	34.329	-0.162	47.27	3.08	58.751	-0.297	47.173	3.562
2021-02-15 03:00:00	-0.196037	58.995	60.4321	66.995	70.6783	78.6354	-1.27371	-1.76988	-2.58754	-3.20267	-3.33721	-3.11697	0	4971.34	-10.6968	-20.1895	-137.316	14.6176	24.1992													3831.45	-10.4944	-19.8201	-130.068	20.1717	28.493	-0.302	954.479	49.7	1.575	44.345	-0.19	47.653	3.089	58.949	-0.303	47.4	3.536
2021-02-15 04:00:00	-0.385797	60.3471	62.8775	69.5929	72.4892	80.6042	-1.49258	-2.24417	-3.20917	-3.80858	-4.19163	-3.82589	0	4839.26	-10.781	-20.3526	-138.743	17.4503	24.0785													3849.01	-10.5039	-19.8387	-130.131	20.5794	28.5784	-0.27	954.529	50.005	1.406	40.044	-0.177	48.112	2.715	59.08	-0.323	47.882	3.408
2021-02-15 05:00:00	-0.334842	60.2583	63.1254	71.1758	74.4671	82.5125	-1.44233	-2.28633	-3.54958	-4.21612	-4.51479	-4.06205	0	4707.19	-10.8652	-20.5158	-140.169	20.2831	23.9579													3863.34	-10.5146	-19.8606	-130.287	21.5534	28.5982	-0.412	954.344	50.773	1.227	34.958	-0.463	49.523	2.484	57.933	-0.427	48.315	3.038
2021-02-15 06:00:00	3.01086	60.235	63.3729	71.75	74.9033	83.0083	-1.40888	-2.29942	-3.61563	-4.2765	-4.58154	-4.23836	0	4773.47	-10.9052	-20.5914	-139.623	20.6763	25.1088													3877.47	-10.5254	-19.8827	-130.448	22.5631	28.6138	-0.282	954.204	50.483	1.271	45.054	-0.34	49.612	2.075	56.899	-0.475	49.417	2.929
2021-02-15 07:00:00	115.06	55.9308	57.4579	69.105	72.1933	79.27	0.390583	-0.036125	-1.94129	-2.64971	-2.88117	-3.32952	0	4897.63	-10.9322	-20.6415	-138.501	20.3577	26.6307													4081.2	-10.5296	-19.8849	-130.371	19.4764	28.7076	0.253	954.167	50.318	1.32	44.818	-0.105	49.812	2.275	59.385	-0.29	49.57	2.861
2021-02-15 08:00:00	285.295	53.3671	52.5183	58.6763	59.6621	59.5371	2.59437	2.709	2.21875	1.69867	2.98	0.416613	0	4981.01	-10.7927	-20.381	-135.031	20.9678	28.0167													4407.36	-10.5296	-19.8742	-130.141	13.7442	28.8519	1.628	953.835	51.442	1.094	48.989	0.753	51.753	1.812	47.37	0.435	48.84	2.588
2021-02-15 09:00:00	405.698	54.5667	52.9771	54.5871	54.2042	55.0083	2.76783	3.07088	3.81542	3.7195	4.44013	3.07667	0	5012.73	-10.4423	-19.727	-128.585	22.7552	29.2306													4652.34	-10.4743	-19.7645	-128.929	10.5706	29.1878	1.813	953.851	51.215	1.541	101.136	0.82	52.348	1.685	82.571	0.568	49.955	1.989
2021-02-15 10:00:00	507.198	52.3371	51.005	51.7875	52.0887	53.1746	3.8185	4.0415	5.16833	4.87113	5.32683	5.23022	0	5056.26	-10.1071	-19.101	-122.521	24.3154	30.2872													4682.17	-10.2727	-19.3928	-125.111	14.1773	30.0318	2.862	954.504	49.235	1.936	87.676	1.73	51.147	2.301	84.804	1.398	51.695	2.389
2021-02-15 11:00:00	546.46	47.5896	46.4025	48.0971	47.705	48.6754	5.14354	5.38583	6.11558	5.91092	6.34196	6.1566	0	5197.7	-9.89794	-18.7077	-119.62	23.9944	30.0419													4712.01	-10.071	-19.021	-121.293	17.7841	30.8758	3.86	954.731	45.05	2.178	116.577	2.805	46.803	2.608	118.038	2.42	47.31	2.756
2021-02-15 12:00:00	529.591	45.3446	44.1617	45.8171	45.7112	44.7025	5.8295	6.02388	6.87975	6.56075	7.95338	8.00102	0	5339.14	-9.68874	-18.3145	-116.719	23.6735	29.7965													4637.21	-10.0608	-18.9984	-121.83	15.8332	30.157	4.732	954.773	42.282	1.803	159.46	3.713	43.438	2.121	164.544	3.245	43.857	2.235
2021-02-15 13:00:00	473.8	43.2542	41.7083	41.9129	42.7058	41.5179	6.28108	6.67658	8.13375	7.53204	8.9475	8.7128	0	5310.94	-9.64124	-18.2217	-116.613	21.7132	29.1598													4555.87	-10.0627	-18.9976	-122.64	13.5348	29.3406	5.528	954.56	39.79	2.208	136.791	4.388	41.088	2.768	141.814	4.128	40.78	2.829
2021-02-15 14:00:00	361.334	41.4671	41.3113	42.4883	42.4946	40.5763	7.0335	6.84771	7.8255	7.58196	9.04375	8.61828	0	5233.38	-9.64079	-18.2163	-117.321	19.276	28.4093													4665.97	-9.9029	-18.6973	-120.91	13.3667	28.6686	5.907	954.185	38.645	2.431	171.716	4.86	39.84	2.987	179.16	4.658	39.323	3.205
2021-02-15 15:00:00	197.477	45.3113	44.645	45.9392	45.4979	44.5671	6.56217	6.53758	7.12317	7.10663	8.11138	7.46214	0	5294.34	-9.51834	-17.9896	-116.787	21.0409	27.1296													4899.61	-9.63882	-18.2037	-117.54	14.5733	28.0898	6.11	953.461	41.305	2.249	190.276	5.138	42.61	2.901	185.246	4.708	42.802	3.04
2021-02-15 16:00:00	51.7212	54.3246	53.4221	56.0458	56.3183	55.6729	4.98808	4.9565	4.86596	4.71025	5.46525	4.44673	0	5530.71	-9.24136	-17.4826	-114.681	28.1278	25.1798													5167.07	-9.36629	-17.6958	-114.12	16.6178	27.4467	5.108	953	48.517	2.041	236.034	4.538	49.32	2.681	228.439	4.238	49.82	2.906
2021-02-15 17:00:00	0.512571	64.0946	64.4437	67.5567	68.6654	69.4467	3.01017	2.70979	2.34337	1.95017	2.26483	1.01293	0	5778.29	-8.9825	-17.0081	-112.603	34.422	23.4624													5523.79	-9.07148	-17.15	-110.566	20.8741	26.6339	3.897	952.966	55.88	1.947	234.092	3.935	55.072	3.037	232.127	3.762	55.128	3.476
2021-02-15 18:00:00	-0.184984	67.2638	67.4496	70.5583	70.8371	71.3137	2.87029	2.65033	2.53842	2.376	2.82863	1.77076	0	6118.28	-8.87316	-16.8023	-110.755	34.1748	23.6628													5880.51	-8.77667	-16.6041	-107.012	25.1303	25.8211	3.457	952.471	59.81	2.657	268.782	3.422	59.188	3.534	261.053	3.333	59.327	3.585
2021-02-15 19:00:00	-0.126741	69.5821	69.5917	71.7454	72.0879	72.5029	2.96046	2.78558	2.92858	2.76842	3.25592	2.69846	0	6458.27	-8.76383	-16.5964	-108.908	33.9275	23.8633													6061.75	-8.80149	-16.6545	-108.409	27.1184	24.8269	3.37	952.303	62.675	2.639	283.598	3.053	62.878	3.876	275.858	2.953	63.653	4.376
2021-02-15 20:00:00	-0.200503	70.5925	70.7313	73.1296	74.2179	74.9346	2.83342	2.63429	2.78617	2.602	3.03092	2.7086	0	6633.56	-8.75944	-16.5867	-109.266	33.1457	23.4275													6232.03	-8.84628	-16.7421	-110.115	28.9647	23.8212	3.262	952.026	63.268	1.377	303.518	3.115	61.433	2.345	296.458	3.11	61.712	3.143
2021-02-15 21:00:00	-0.432587	72.8154	72.7933	74.8692	75.13	75.2183	2.90517	2.71821	2.89675	2.74533	3.25854	2.80742	0	6760.91	-8.78559	-16.6341	-110.266	32.2082	22.8065													6429.2	-8.808	-16.6718	-109.978	29.8576	23.3962	3.267	952.01	66.175	1.648	272.029	3.153	67.228	2.504	283.97	3.023	71.295	3.2
2021-02-15 22:00:00		75.2262	75.3267	77.4254	77.8529	78.1663	2.93987	2.72788	2.9335	2.77687	3.28596	2.92632	0	6929.65	-8.74951	-16.5632	-110.295	30.5947	22.2105													6643.71	-8.71611	-16.4997	-108.652	30.1356	23.3456	3.332	951.995	68.397	1.898	277.498	3.232	68.575	2.979	271.113	3.285	74.253	2.855
2021-02-15 23:00:00		74.8508	74.8063	76.8071	77.0012	77.2858	2.97375	2.78504	3.05888	2.87342	3.38829	3.01973	0	7150.82	-8.63465	-16.3428	-109.096	28.1252	21.6464													6945.24	-8.55939	-16.2061	-106.514	30.6575	23.1341	3.295	951.853	68.18	1.836	290.024	3.197	71.017	2.413	296.4	3.275	82.713	2.498
2021-02-16		82.8408	82.7608	83.1217	84.6867	85.205	2.53638	2.40062	2.75058	2.5695	3.08246	2.97153	0	7398.71	-8.48032	-16.0486	-107.466	25.9019	20.9224													7476.47	-8.23151	-15.5919	-102.237	31.8235	22.4977	2.817	951.424	77.66	1.776	292.806	2.947	85.325	2.29	301.719	2.977	93.59	2.6
2021-02-16 01:00:00		91.1042	90.8875	89.8333	92.5583	93.675	1.90688	1.6745	2.05938	1.89221	2.46342	2.47613	0	7867.1	-8.00034	-15.1457	-102.286	25.7093	18.88													8007.7	-7.90364	-14.9777	-97.9604	32.9894	21.8613	2.072	950.921	89.712	1.468	301.552	2.873	93.838	2.11	309.512	2.9	99.9	2.378
2021-02-16 02:00:00	-0.429355	90.125	90.4625	91.2958	93.0875	95.1208	1.18637	1.02321	1.38917	1.18792	1.83033	1.78036	0	8335.48	-7.52036	-14.2428	-97.1049	25.5168	16.8375													8138.4	-7.78433	-14.7451	-96.5751	28.5637	21.3856	1.345	950.542	85.193	0.964	1.579	1.428	83.867	1.664	332.257		99.9	2.162
2021-02-16 03:00:00	-0.337046	95.175	95.1917	93.7042	96.4958	97.7667	1.27233	1.06367	1.30054	1.16654	1.74962	1.77181	0	8591.44	-7.38998	-13.9966	-95.6667	24.9644	16.3061													8244.16	-7.67801	-14.5362	-95.3697	23.7899	20.92	0.938	950.057	95.078	1.45	47.099	2.272	96.425	2.069	46.472		99.9	1.686
2021-02-16 04:00:00	-0.212453	98.6917	98.1417	97.2417	99.1792	99.8792	1.53412	1.39875	1.76063	1.61942	2.17	2.14174	0	8785.63	-7.36125	-13.9413	-95.3167	24.3074	16.214													8468.93	-7.64126	-14.4693	-95.1708	24.9542	20.5835		949.43	99.9	0.923	6.864	2.447	97.92	1.608	330.935	3.408	97.233	2.391
2021-02-16 05:00:00	-0.1026	98.9708	98.4833	98.2	99.5917	100	1.81492	1.65208	2.0005	1.86029	2.37838	2.47332	0	8971.33	-7.36238	-13.9433	-95.5552	24.2304	15.9915													8770.28	-7.64929	-14.4937	-95.6196	29.9402	20.33		948.694	99.9	1.128	78.532	2.177	97.032	1.22	8.109	2.772	97.21	2.217
2021-02-16 06:00:00	1.17595	98.2083	98.1958	98.3375	99.6458	100	2.27738	2.06588	2.3575	2.19404	2.73762	2.78061	0	9146.29	-7.40132	-14.0178	-96.5386	24.8878	15.6038													8990.94	-7.65644	-14.5133	-96.1949	33.2451	19.9116	2.66	948.001	99.878	0.74	298.409	2.6	94.675	0.77	39.582	3.192	95.46	1.262
2021-02-16 07:00:00	24.1774	98.1583	97.9	98.3958	99.2167	99.9167	2.40413	2.29562	2.69258	2.54979	3.09225	3.05615	0	9317.63	-7.43979	-14.0914	-97.3468	25.5092	15.384													8998.75	-7.66123	-14.5202	-97.1038	32.1155	19.058	2.722	947.418	99.69	0.557	64.72	2.4	92.795	0.73	51.723	3.2	99.697	1.08
2021-02-16 08:00:00	73.5739	96.5292	96.1042	96.65	96.7583	97.7208	2.61292	2.58604	3.22733	3.04962	3.73046	3.61389	0	9459.16	-7.47452	-14.1573	-96.7105	25.8346	16.5478													9006.56	-7.66603	-14.5271	-98.0127	30.986	18.2043	2.448	946.855	99.81	1.064	37.597	2.325	95.385	1.856	49.438		99.9	1.263
2021-02-16 09:00:00	106.693	95.3	94.6458	94.5583	94.6667	95.1792	3.16629	3.19212	3.96408	3.776	4.52404	4.41538	0	9600.69	-7.50924	-14.2232	-96.0741	26.16	17.7115													9124.76	-7.73814	-14.6661	-98.7301	32.7802	18.5986	2.933	946.796	97.947	0.814	84.158	2.42	96.857	1.83	58.161		99.9	1.938
2021-02-16 10:00:00	123.59	94.1542	93.5542	92.7708	92.9708	93.3917	3.59504	3.59921	4.47629	4.29508	5.00988	4.89327	0	9834.05	-7.53956	-14.2897	-96.1748	31.2295	18.1428													9249.82	-7.81442	-14.8133	-99.4356	34.7561	19.0704	3.493	946.751	96.573	1.174	76.364	2.842	95.925	1.72	63.67		99.9	1.832
2021-02-16 11:00:00	131.647	92.7625	91.9375	91.3083	91.3333	91.2792	4.46729	4.47175	5.40908	5.16796	5.95042	5.80087	0	10094.1	-7.56859	-14.3563	-96.4896	37.677	18.3612													9420.66	-7.86867	-14.9167	-100.36	35.5164	18.9737	4.27	946.57	93.87	1.013	89.636	3.61	94.423	1.101	83.326	3.429	99.87	1.165
2021-02-16 12:00:00	152.134	87.6542	87.2542	87.0917	86.6417	86.6167	5.54979	5.51958	6.45642	6.24558	7.06467	6.78942	0																			9620.96	-7.90873	-14.992	-101.425	35.4944	18.5112	5.393	946.469	84.302	1.143	90.233	4.637	86.918	1.076	78.094	4.387	94.615	1.032
2021-02-16 13:00:00	132.307	86.9667	86.15	85.5958	85.4625	85.5917	6.07971	6.10129	7.02067	6.75417	7.48375	7.27254	0																									6.032	946.329	83.968	1.438	92.72	5.268	86.388	1.606	75.288	4.998	93.078	1.527
2021-02-16 14:00:00	88.3503	87.25	86.0708	85.9667	85.7125	86.5708	6.92179	7.03554	7.83233	7.64175	7.93837	7.5944	0																									6.752	945.854	83.998	0.984	87.923	6.05	86.498	1.15	63.105	5.747	93.632	1.227
2021-02-16 15:00:00	43.9474	91.2875	90.2167	89.875	89.9917	90.6208	6.77471	6.79537	7.46146	7.30987	7.76875	7.4106	0																									6.908	945.256	91.687	0.906	205.294	6.29	90.227	0.999	223.433	6.18	91.682	1.325
2021-02-16 16:00:00	7.76885	92.6667	91.7208	91.5292	91.975	92.7042	6.46808	6.45717	6.95542	6.8575	7.20237	6.66333	0																									6.633	944.551	94.965	0.895	319.028	6.235	90.56	1.155	296.677	6.093	93.528	1.496
2021-02-16 17:00:00	0.061384	94.8833	94.3167	94.4833	95.1125	95.6417	6.21308	6.08054	6.46096	6.35062	6.73967	6.13022	0																									6.522	944.201	97.92	0.901	256.115	6.245	91.68	1.466	268.546	6.125	95.247	1.729
2021-02-16 18:00:00	-0.407768	94.4667	94.1625	95.15	95.3708	95.9875	6.18642	6.01063	6.32679	6.16667	6.57737	5.91512	0																									6.593	943.736	96.713	1.026	294.83	6.387	90.012	1.778	289.219	6.195	95.08	1.818
2021-02-16 19:00:00	-0.304154	95.8042	95.3292	96.1375	96.45	96.975	5.92996	5.76479	6.08883	5.91704	6.34421	5.75775	0																									6.233	943.491	99.72	0.869	331.375	6.322	90.483	0.929	318.273	6.145	95.273	0.86
2021-02-16 20:00:00	-0.399535	97.6583	96.9667	97.8417	97.8625	98.275	5.81029	5.69429	6.06342	5.90988	6.38042	5.80372	0																										943.669	99.9	1.547	279.441	5.932	97.227	1.969	264.126	6.095	98.433	2.142
2021-02-16 21:00:00	1.02081	99.275	98.5	99.4167	99.2917	99.6917	5.88146	5.754	6.09138	5.94475	6.44871	5.86754	0																										943.328	99.9	1.936	273.078		99.9	3.664	269.14		99.9	5.142
2021-02-16 22:00:00		99.3708	98.6083	99.6417	99.5083	99.8417	5.90183	5.74167	6.06296	5.90746	6.41883	5.81975	0																										943.305	99.9	2.293	265.786	5.818	99.597	4.533	269.443		99.9	5.793
2021-02-16 23:00:00		98.2458	97.7333	99.2667	98.8667	99.0708	5.53758	5.32062	5.44888	5.19004	5.70958	4.88007	0																										943.654	99.9	1.524	293.245	5.783	96.438	3.131	284.66	5.797	99.172	3.859
2021-02-17		99.2875	98.9833	99.9	99.9042	99.9292	4.87633	4.60896	4.46467	4.18687	4.78696	3.62761	0																									5.745	943.458	99.41	0.947	306.635	5.732	94.17	3.111	287.532	5.727	96.995	4.695
2021-02-17 01:00:00		97.4167	97.4875	100	99.8708	99.8875	4.64712	4.35487	4.08879	3.78204	4.20958	2.83127	0																									5.378	943.128	97.585	3.082	287.584	5.602	90.358	5.667	284.889	5.63	92.5	6.671
2021-02-17 02:00:00	-0.119393	99.1333	98.8708	100	100	100	4.27475	4.04029	3.91158	3.69046	4.35329	3.17375	0																									4.843	942.477	99.65	2.121	280.884	5.205	94.4	4.197	282.98	5.255	98.12	5.36
2021-02-17 03:00:00	-0.036938	97.2083	97.0167	99.8917	99.5167	99.4583	4.84217	4.636	4.62717	4.43004	5.07475	4.00751	0																									5.18	941.753	98.953	3.672	277.892	5.498	91.053	7.173	279.433	5.652	92.62	7.793
2021-02-17 04:00:00	-0.266233	96.4542	96.4167	99.9667	99.3042	99.0417	4.50271	4.20904	3.83133	3.45133	4.29192	2.92333	0																									5.224	941.576	96.803	4.193	282.577	5.357	90.422	8.168	287.996	5.41	93.817	9.774
2021-02-17 05:00:00	-0.180464	98.6917	98.625	100	99.9958	99.9917	3.99129	3.73804	3.37513	3.07742	3.84546	2.46097	0																										940.663	99.9	1.024	277.361	5.097	92.033	4.232	280.959	5.57	90.31	5.577
2021-02-17 06:00:00	12.9334	99.3833	99.2167	100	100	100	3.71913	3.45312	3.08217	2.80404	3.46983	2.24773	0																										940.678	99.9	3.227	281.676	4.742	93.348	6.309	282.118	5.51	88.955	6.651
2021-02-17 07:00:00	103.125	92.8042	93.5875	100	99.8958	99.6	4.99033	4.71317	3.93521	3.63883	4.35738	3.26756	0																									4.816	940.592	97.048	1.31	344.53	4.663	91.543	5.615	293.059	5.395	89.342	7.772
2021-02-17 08:00:00	170.379	99.7458	99.6	100	100	100	3.23746	3.29988	3.84033	3.6565	4.57871	4.41499	0																										940.21	99.9	1.434	58.963		99.9	3.558	340.606	5.023	94.112	5.982
2021-02-17 09:00:00	356.135	98.3125	96.5458	98.7417	97.8208	96.3042	5.24621	5.34887	6.01233	5.74921	6.92087	6.54351	0.186445																									5.75	940.245	99.895	1.363	69.81	5.159	98.245	1.411	53.966	5.688	86.233	1.564
2021-02-17 10:00:00	518.39	83.8096	81.7225	84.7613	82.735	84.0317	8.30829	8.51892	9.45725	9.16004	9.45708	9.32811	0																									6.937	940.652	88.145	1.33	82.243	6.055	88.757	1.356	70.206	6.555	83.723	1.236
2021-02-17 11:00:00	565.812	81.9375	80.5721	80.0075	78.0708	79.4058	9.94708	10.0288	11.2817	11.3529	11.6929	11.0283	0																									8.795	940.956	83.687	1.572	126.168	7.755	87.687	1.477	116.146	7.428	93.81	1.134
2021-02-17 12:00:00	549.38	70.9629	69.0433	71.1054	69.7792	68.1696	12.2967	12.4708	13.3092	13.1675	14.065	13.8918	0																									11.392	941.001	69.043	2.212	133.064	10.218	72.17	2.594	138.076	9.823	74.542	2.346
2021-02-17 13:00:00	480.065	66.56	64.0529	63.7683	64.2617	61.3667	13.1421	13.4779	14.805	14.2946	15.5879	14.9805	0																			11578.1	-7.57461	-14.3602	-100.068	33.6685	14.8136	12.525	940.84	63.795	2.241	174.753	11.257	67.04	2.738	187.751	10.903	68.092	2.77
2021-02-17 14:00:00	364.209	65.4342	65.2729	64.9946	64.2217	61.0308	13.1738	12.8883	14.05	13.99	15.4025	14.9824	0																			11744.1	-7.58281	-14.38	-100.006	36.0107	15.0335	12.633	940.398	62.013	2.44	230.575	11.45	64.848	3.103	230.826	11.145	65.232	3.218
2021-02-17 15:00:00	213.818	70.6663	69.8137	70.4492	69.2362	67.1996	12.4654	12.4358	13.2021	13.1512	14.1621	13.2656	0	12051.6	-7.64954	-14.5179	-100.628	42.652	15.5153													11978.4	-7.60832	-14.4357	-99.9646	40.1579	15.521	12.112	939.843	66.875	3.109	253.057	11.157	69.202	3.944	251.323	10.83	70.282	3.952
2021-02-17 16:00:00	58.3084	75.2708	74.5633	77.0042	76.5671	75.7417	10.7367	10.6579	10.8283	10.5883	11.33	9.63629	0	11831.1	-7.89231	-14.9687	-104.395	39.5885	15.3539													12079.3	-7.68637	-14.588	-100.932	43.11	15.7723	10.872	939.3	70.017	4.071	255.431	10.285	70.952	5.478	252.124	10.015	72.253	6.112
2021-02-17 17:00:00	1.19471	82.3888	82.2579	84.6	84.1642	84.2483	8.67875	8.51108	8.62679	8.40275	8.92417	7.42133	0	11590.7	-8.12597	-15.4029	-108.084	36.8357	15.1395													11755	-7.93202	-15.0483	-105.116	42.2503	15.2701	9.197	939.15	76.973	5.14	261.522	9.332	74.383	7.122	260.404	9.648	71.99	7.847
2021-02-17 18:00:00	-0.366495	85.0667	85.4792	88.5917	88.575	88.6375	7.65458	7.30883	7.14958	6.79138	7.30813	5.58699	0	11092.3	-8.24256	-15.6244	-110.753	38.0832	14.2428													11430.7	-8.17767	-15.5086	-109.301	41.3906	14.7678	8.383	939.027	78.875	4.851	279.693	9.007	73.578	7.595	275.584	9.117	72.158	8.26
2021-02-17 19:00:00	-0.329163	85.0833	85.9083	90.1792	89.9125	90.65	7.02292	6.56238	6.20862	5.87375	6.25367	4.08907	0	10593.9	-8.35915	-15.8459	-113.421	39.3306	13.3461													11101.3	-8.29443	-15.7221	-111.26	38.1609	14.5164	7.852	939.122	77.948	2.315	295.261	8.582	72.835	4.731	282.668	8.877	70.557	5.368
2021-02-17 20:00:00	-0.43502	86.7583	90.0458	94.1958	96.3542	97.9167	6.64462	5.60042	4.68213	4.00554	3.79458	2.34364	0	9964.27	-8.55158	-16.1999	-117.509	35.2353	12.0906													10771.5	-8.3977	-15.9097	-112.986	34.6831	14.2914	7.628	939.468	78.928	2.594	299.76	7.457	78.05	3.839	290.271	7.533	77.65	4.692
2021-02-17 21:00:00	-0.432587	89.5917	93.3125	97.3125	99.2208	99.9875	6.24742	5.11362	4.07625	3.27404	3.03121	1.61506	0	9288.31	-8.77082	-16.6008	-122.098	29.2511	10.7082													10704.2	-8.38598	-15.8825	-113.19	31.8954	13.8698	7.157	939.723	83.905	0.783	337.85	6.982	84.962	1.126	281.36	6.97	88.088	1.516
2021-02-17 22:00:00		95.5708	96.9458	99.7667	100	100	5.29213	4.62829	3.87108	2.98904	2.61863	1.00138	0	8817.13	-8.93867	-16.908	-125.484	24.8639	9.77994													10833.2	-8.28832	-15.6947	-112.256	29.6235	13.3013	6.175	939.932	95.7	0.999	52.985	6.108	90.963	1.718	64.168	6.158	95.13	1.934
2021-02-17 23:00:00		96.4167	97.8583	100	100	100	4.80179	4.15358	3.49846	2.69204	2.18921	0.666248	0	8646.13	-9.03117	-17.078	-127.106	22.8178	9.51744													10881.3	-8.214	-15.5519	-111.574	27.9636	12.8412	5.708	940.211	96.422	1.736	38.6	5.77	91.022	2.459	54.277	5.668	96.887	2.62
2021-02-18		96.4917	98.1917	100	100	100	4.50221	3.87737	3.249	2.55987	2.08642	0.348616	0	8514.37	-9.11598	-17.2344	-128.506	21.2471	9.36918													10672.2	-8.21391	-15.5523	-111.693	28.2496	12.7254	5.44	940.388	95.36	1.378	52.859	5.543	89.33	2.146	70.73	5.39	95.113	2.172
2021-02-18 01:00:00		97.1333	98.4292	100	100	100	4.26725	3.734	3.14392	2.57479	1.80342	0.249827	0	8881.32	-9.10302	-17.2183	-127.074	25.7156	10.6726													10463.2	-8.21382	-15.5526	-111.811	28.5355	12.6097	5.087	940.698	98.86	1.583	32.05	5.335	91.668	2.124	64.881	5.288	97.487	2.072
2021-02-18 02:00:00	-0.136744	97.3417	97.8625	100	100	100	4.54021	4.20942	3.89675	3.50263	3.21567	1.95689	0	9248.27	-9.09005	-17.2023	-125.642	30.1842	11.976													10631.8	-8.08213	-15.3083	-109.837	30.2815	12.6289	4.994	940.94	99.352	2.082	33.67	5.243	96.065	3.866	51.186		99.875	3.491
2021-02-18 03:00:00	-0.131642	99.7792	99.6583	100	100	100	4.31871	4.15875	4.39888	4.15838	4.62333	4.14822	0	9941.81	-8.73616	-16.5414	-119.896	32.4502	12.4355													10839.5	-7.93682	-15.0386	-107.647	32.1785	12.662		940.864	99.9	1.947	63.437		99.9	3.562	78.863		99.9	3.866
2021-02-18 04:00:00	-0.212137	100	100	100	100	100	4.68096	4.49342	4.77096	4.54771	5.00917	4.56635	0	10750.3	-8.26231	-15.6537	-112.631	33.9413	12.5979													10922	-7.84694	-14.8707	-106.161	32.7969	12.8046		940.661	99.9	1.875	95.631		99.9	3.808	105.241		99.9	4.299
2021-02-18 05:00:00	-0.309352	100	100	100	100	100	4.52133	4.25871	4.28808	3.92837	3.89046	3.00562	0	10992.3	-8.06736	-15.2875	-109.74	34.0232	12.5598													10911	-7.79843	-14.7789	-105.202	32.4612	13.0289		940.507	99.9	1.811	86.645	5	99.033	3.158	100.724		99.9	3.864
2021-02-18 06:00:00	5.95523	99.925	99.9833	100	100	100	4.43808	4.06937	3.84579	3.44396	2.94196	1.59774	0	10404.7	-8.28082	-15.6851	-113.252	32.0414	12.2282													10894.5	-7.76097	-14.707	-104.542	31.6985	13.1143		940.547	99.9	1.916	62.88	4.972	96.973	3.178	82.117		99.9	3.626
2021-02-18 07:00:00	20.9417	96.9625	97.6708	100	100	100	5.26046	4.95137	4.81862	4.52088	4.71742	3.97377	0	9910.38	-8.45305	-16.0056	-116.109	30.2992	11.9353													10860	-7.75868	-14.6988	-104.833	29.5756	12.7572	5.624	940.618	96.15	1.875	62.838	5.112	94.147	3.144	82.43	4.9	99.845	3.652
2021-02-18 08:00:00	129.923	90.7333	90.6875	97.7667	96.7708	99.7083	6.52321	6.435	6.60771	6.30367	6.52008	6.23498	0	10603	-8.10025	-15.3447	-110.621	31.6073	12.1369													10825.5	-7.7564	-14.6905	-105.124	27.4527	12.4001	6.177	940.445	89.967	1.669	76.735	5.41	90.878	2.674	90.766	5.13	96.268	3.737
2021-02-18 09:00:00	118.815	89.9708	89.375	91.65	90.5875	92.2167	6.51508	6.46996	7.272	7.01904	7.61121	7.2609	0	11295.7	-7.74744	-14.6838	-105.132	32.9153	12.3384													10717.8	-7.79151	-14.7662	-106.045	32.6297	12.0842	6.428	940.813	88.598	2.141	89.879	5.627	90.035	2.864	96.63	5.31	95.617	3.77
2021-02-18 10:00:00	111.875	86.5667	85.9125	87.2083	86.0333	86.0958	6.88175	6.82842	7.70079	7.52554	8.40875	7.84749	0	11399.7	-7.67828	-14.5567	-104.139	34.4964	12.3152													10602.5	-7.8305	-14.8506	-107.032	38.5647	11.7726	6.862	941.358	83.185	2.323	89.495	6.042	85.142	3.138	92.492	5.73	89.132	3.827
2021-02-18 11:00:00	120.764	84.5958	83.85	84.3417	83.125	82.7917	7.60642	7.57888	8.4875	8.3525	9.16583	8.51257	0	11296.2	-7.70914	-14.6179	-104.73	36.1739	12.2128													10837.9	-7.7119	-14.6289	-105.569	39.3265	11.4623	7.592	941.55	80.877	2.216	82.132	6.828	82.958	2.972	79.964	6.467	87.155	3.352
[truncated: 8,013 more rows]
[truncated: 4 more columns]
