# Supplementary material for: Drivers of diurnal and seasonal dynamics of triple oxygen isotopes in atmospheric water vapor and precipitation at a Mediterranean forest site
Source: Copernicus journal article supplement (doi:10.5194/egusphere-2025-5879), 2025-12-05
Supplement: Supplementary file 5 [file S03_O3HP_precipitation_data_final.xlsx]

## Sheet: Table S1 - Precipitation
	Table S1: Amount-weighted average meteorological conditions, precipitation amount and isotope composition of quasi-event based precipitation samples collected at O3HP in 2021. The theoretical isotope composition of water vapor in equilibrium with precipitation and the amount-weighted isotope composition of atmospheric water vapor during the precipitation event are also shown for comparison. The p…
	Sample Information			Dominant weather regime	Moisture source region(s)	Meteorological conditions			Isotope composition of precipitation					Amount-weighted isotope composition of atmospheric water vapor at 12.5 m agl					Isotope equilibrium fractionation factors			Theoretical isotope composition of water vapor in equilibrium with precipitation					Isotope difference between water vapor estimated from precipitation data assuming isotope equilibrium and amount-weighted atmospheric water vapor measured at 12.5 m agl					Type
	Sample ID	Sampling start time	Sampling end time			Amount-weighted T (ºC)	Amount-weighted RH(%)	Precipitation amount (mm)	δ17OP (‰)	δ18OP (‰)	δ2HP (‰)	17O-excessP (per meg)	d-excessP (‰)	δ17OV (‰)	δ18OV (‰)	δ2HV (‰)	17O-excessV (per meg)	d-excessV (‰)	alpha17_eq	alpha18_eq	alpha2_eq	δ17OVeq (‰)	δ18OVeq (‰)	δ2HVeq (‰)	17O-excessVeq (per meg)	d-excessVeq (‰)	Δδ17OVeq-V (‰)	Δδ18OVeq-V (‰)	Δδ2HVeq-V (‰)	Δ17O-excessVeq-V (per meg)	Δd-excessVeq-V (‰)
	P-O3HP-20210105_1100	2020-12-27 21:00:00	2021-01-02 10:00:00	Atlantic Ridge	N Atlantic – Mediterranean / Europe	1.82548	99.3891	5.40692	-11.773	-22.306	-162.877	68.0682	15.5708	-11.2418	-21.2405	-157.901	33.4467	12.0233	1.00612	1.01161	1.1089	-17.7875	-33.524	-245.087	56.5282	23.1044	-6.54576	-12.2835	-87.1869	23.0815	11.0811	–
	P-O3HP-20210111_1630	2021-01-05 12:00:00	2021-01-11 09:00:00	Atlantic Ridge	N Atlantic – Mediterranean / Europe	0.686375	86.0428	4.47469	-9.12343	-17.3039	-130.138	51.1295	8.29292	n.d.	n.d.	n.d.	n.d.	n.d.	1.00619	1.01174	1.11069	-15.2213	-28.7046	-216.831	39.4602	12.8056	n.d.	n.d.	n.d.	n.d.	n.d.	–
	P-O3HP-20210121_1700	2021-01-20 03:00:00	2021-01-21 05:00:00	NAO negative	Mediterranean	5.73137	98.1438	4.47469	-2.55987	-4.89047	-23.901	25.3468	15.2228	n.d.	n.d.	n.d.	n.d.	n.d.	1.0059	1.01118	1.103	-8.40646	-15.888	-115.05	14.2338	12.0536	n.d.	n.d.	n.d.	n.d.	n.d.	–
	P-O3HP-20210125_1130	2021-01-22 11:00:00	2021-01-25 04:00:00	NAO negative	East Atlantic / North Atlantic	6.07221	98.911	23.6786	-3.97629	-7.58012	-48.7982	33.3327	11.8428	-9.14284	-17.3327	-128.079	47.8722	10.583	1.00588	1.01114	1.1025	-9.79561	-18.5124	-137.234	22.2557	10.8653	-0.652776	-1.17967	-9.15503	-25.6166	0.282331	cloud
	P-O3HP-20210201_1010	2021-01-30 13:00:00	2021-02-01 11:00:00	NAO negative	North Atlantic	5.77556	95.535	15.2885	-5.24911	-9.97878	-70.0132	32.3234	9.81707	-10.6197	-20.0923	-148.717	40.9652	12.0216	1.00589	1.01117	1.10294	-11.0775	-20.9155	-156.807	21.215	10.5166	-0.457749	-0.823149	-8.09022	-19.7502	-1.50502	cloud
	P-O3HP-20210208_0930	2021-02-07 03:00:00	2021-02-07 11:00:00	NAO negative	Mediterranean	6.20845	97.3543	17.153	-4.13163	-7.85565	-51.3428	23.9671	11.5024	-8.85877	-16.7553	-125.574	24.8077	8.46798	1.00587	1.01112	1.1023	-9.9425	-18.7708	-139.388	12.9047	10.7785	-1.08373	-2.01549	-13.8134	-11.9031	2.31056	cloud
	P-03HP-20210209_0822	2021-02-08 18:00:00	2021-02-08 23:00:00	NAO negative	(no unique source)	3.7076	96.337	7.08493	-8.71275	-16.516	-125.076	42.3181	7.05184	-12.4032	-23.4311	-174.09	39.0697	13.3596	1.00601	1.0114	1.10601	-14.6371	-27.5974	-208.936	30.9866	11.8436	-2.23394	-4.1663	-34.8465	-8.0831	-1.51606	cloud
	P-O3HP-20210212_0821	2021-02-09 19:00:00	2021-02-10 02:00:00	NAO negative	East Atlantic	5.42765	98.2984	5.40692	-4.42542	-8.42367	-55.4688	31.2974	11.9206						1.00591	1.01121	1.10344	-10.278	-19.4139	-144.016	20.1519	11.2954	n.d.	n.d.	n.d.	n.d.	n.d.	–
	P-O3HP-20210215_0821	2021-02-12 15:00:00	2021-02-13	NAO negative	(no unique source)	4.06563	99.5048	3.35602	-4.64196	-8.83661	-56.0085	33.6982	14.6844	-9.96529	-18.8454	-137.583	30.1462	13.18	1.00599	1.01136	1.10547	-10.5702	-19.9663	-146.072	22.4058	13.6587	-0.604923	-1.12092	-8.48866	-7.74041	0.478738	cloud
	P-O3HP-20210223_1422	2021-02-22 09:00:00	2021-02-23 07:00:00	Scandinavian Blocking	(no unique source)	8.80446	85.1195	7.27137	-1.82816	-3.51876	-23.0104	31.3548	5.13969	-7.18474	-13.6066	-96.9679	23.2132	11.8849	1.00573	1.01085	1.09862	-7.51086	-14.2157	-110.709	20.5619	3.0167	-0.326117	-0.609125	-13.7412	-2.65126	-8.86824	cloud
	P-O3HP-20210310_0853	2021-03-06 16:00:00	2021-03-08 17:00:00	Atlantic Ridge	Mediterranean (Europe)	7.85353	79.0575	9.13583	-2.19918	-4.21718	-21.7577	29.7789	11.9798	-8.07239	-15.2973	-107.009	34.3515	15.3688	1.00578	1.01095	1.09995	-7.93105	-15.0029	-110.648	18.8884	9.37527	0.141342	0.294356	-3.63873	-15.463	-5.99357	evaporation
	P-O3HP-20210404_0820	2021-04-03 17:00:00	2021-04-03 19:00:00	–	Northern Europe	14.7712	50.6543	4.1018	-3.3348	-6.30442	-42.8336	-1.09844	7.6018	-8.7894	-16.6097	-119.565	15.3611	13.3133	1.00541	1.01026	1.0907	-8.70196	-16.3958	-122.431	-11.3057	8.73492	0.0874395	0.213947	-2.86675	-26.6667	-4.57833	evaporation
	P-O3HP-20210412_0729	2021-04-10 15:00:00	2021-04-12 02:00:00	–	Mediterranean	6.73263	95.1436	30.7635	-4.07129	-7.75102	-46.9844	28.8773	15.0237	-8.6932	-16.4816	-115.397	44.5875	16.4563	1.00584	1.01107	1.10155	-9.85358	-18.6131	-134.839	17.87	14.0654	-1.16038	-2.13146	-19.4426	-26.7175	-2.39092	cloud
	P-O3HP-20210420_0929	2021-04-16 09:00:00	2021-04-19 13:00:00	–	Continental Europe	5.3698	80.5378	9.13583	-4.62284	-8.79509	-50.9109	30.7856	19.4498	-9.62355	-18.2233	-125.971	40.8034	19.8159	1.00592	1.01121	1.10353	-10.4775	-19.7873	-139.952	19.6339	18.3466	-0.853977	-1.56398	-13.9811	-21.1695	-1.46926	cloud
	P-O3HP-20210427_1308	2021-04-26 04:00:00	2021-04-27	–	Mediterranean	10.6702	81.7379	2.61024	-1.87041	-3.55029	-27.8837	5.73221	0.518609	-7.56273	-14.3091	-106.905	18.4608	7.56726	1.00563	1.01066	1.09606	-7.45412	-14.0615	-113.081	-4.87259	-0.589289	0.108616	0.247553	-6.17613	-23.3334	-8.15655	evaporation
	P-O3HP-20210428_1339	2021-04-28 05:00:00	2021-04-28 11:00:00	–	Continental Europe	9.15073	99.0104	5.59336	-2.9695	-5.66123	-33.3141	23.7008	11.9757	n.d.	n.d.	n.d.	n.d.	n.d.	1.00571	1.01082	1.09814	-8.62721	-16.3005	-119.703	12.9433	10.7009	n.d.	n.d.	n.d.	n.d.	n.d.	–
	P-O3HP-20210429_1540	2021-04-28 14:00:00	2021-04-29 12:00:00	–	Mediterranean	8.97885	99.5411	26.4752	-4.43774	-8.43369	-57.5336	24.2514	9.93585	n.d.	n.d.	n.d.	n.d.	n.d.	1.00572	1.01083	1.09837	-10.0963	-19.0605	-141.944	13.4764	10.5394	n.d.	n.d.	n.d.	n.d.	n.d.	–
	P-O3HP-20210503_0932	2021-04-29 18:00:00	2021-05-01 23:00:00	NAO negative	Mediterranean / East Atlantic	10.2523	99.2849	46.2385	-4.45722	-8.47982	-57.1396	29.2519	10.699	-9.24476	-17.4916	-128.128	30.4216	11.8051	1.00565	1.0107	1.09663	-10.0483	-18.98	-140.217	18.6055	11.6226	-0.803547	-1.48836	-12.0893	-11.8161	-0.182408	cloud
	P-O3HP-20210506_1246	2021-05-05 06:00:00	2021-05-05 07:00:00	NAO negative	(no unique source)	9.39729	94.2006	1.30512	-2.05112	-3.93006	-29.3153	25.9303	2.12514	-6.72264	-12.7263	-93.8011	17.2789	8.00969	1.00569	1.01079	1.0978	-7.70092	-14.5632	-115.788	15.1978	0.718096	-0.97828	-1.83687	-21.9865	-2.08105	-7.2916	cloud
	P-O3HP-20210511_1240	2021-05-07 02:00:00	2021-05-11 09:00:00	NAO negative	Mediterranean / East Atlantic	11.9174	95.9929	53.3234	-3.05003	-5.82641	-29.5451	30.6477	17.0662	-7.7076	-14.6034	-102.501	30.0367	14.3264	1.00556	1.01054	1.09439	-8.56256	-16.1925	-113.249	20.1661	16.291	-0.854965	-1.58909	-10.7481	-9.87056	1.96464	cloud
	P-O3HP-20210517_0911	2021-05-15 09:00:00	2021-05-16 19:00:00	NAO negative	North Atlantic	11.4926	96.5325	13.797	-3.87116	-7.37862	-57.2064	31.6826	1.82253	-8.93727	-16.9092	-128.172	27.0546	7.10119	1.00558	1.01058	1.09496	-9.40101	-17.7695	-138.968	21.1593	3.18783	-0.463739	-0.860317	-10.7959	-5.89522	-3.91336	cloud
	P-O3HP-20210525_1326	2021-05-21 19:00:00	2021-05-24 08:00:00	Icelandic Low / Atlantic Low	Mediterranean (East Atlantic)	10.6521	96.3423	8.39004	-1.91705	-3.68925	-21.4125	32.6332	8.10147	-6.62348	-12.5489	-93.1722	22.3989	7.21892	1.00563	1.01066	1.09608	-7.50145	-14.2008	-107.197	22.0267	6.409	-0.877971	-1.65188	-14.025	-0.372204	-0.809924	cloud
	P-O3HP-20210531_0737	2021-05-30 14:00:00	2021-05-30 15:00:00	Scandinavian Blocking	Continental Europe	20.2733	55.5218	5.59336	-2.57466	-4.91934	-29.0697	25.8422	10.285	-7.82958	-14.8398	-106.231	33.7609	12.4872	1.00515	1.00975	1.08404	-7.68304	-14.5313	-104.339	16.1357	11.9119	0.146538	0.308473	1.89253	-17.6251	-0.575261	evaporation
	P-O3HP-20210602_1442	2021-05-31 12:00:00	2021-06-02 07:00:00	Scandinavian Blocking	(no unique source)	13.8769	84.5596	2.98313	-1.02394	-1.97165	-8.62487	17.5926	7.14834	-7.37085	-13.9522	-99.2616	20.4825	12.3559	1.00546	1.01035	1.09184	-6.44813	-12.1908	-92.0154	7.30042	5.51117	0.922715	1.76136	7.24616	-13.1821	-6.84472	evaporation
	P-O3HP-20210607_1151	2021-06-06 16:00:00	2021-06-06 17:00:00	Scandinavian Blocking	(no unique source)	20.164	62.7175	0.745782	-0.683069	-1.31441	-13.8089	11.1626	-3.2936	-7.73207	-14.6629	-107.222	37.1982	10.0806	1.00515	1.00976	1.08416	-5.80619	-10.9707	-90.3676	1.44654	-2.60165	1.92588	3.69213	16.8548	-35.7517	-12.6823	evaporation
	P-O3HP-20210609_1209	2021-06-08 15:00:00	2021-06-08 15:00:00	Atlantic Low	Continental Europe	22.445	56.022	4.1018	-3.98311	-7.58804	-51.1475	30.7015	9.55683	-8.29786	-15.7282	-113.053	37.9826	12.7726	1.00505	1.00956	1.08156	-8.98562	-16.9893	-122.699	21.1832	13.215	-0.687762	-1.26109	-9.64628	-16.7994	0.442415	cloud
	P-O3HP-20210611_0822	2021-06-10 15:00:00	2021-06-10 18:00:00	Icelandic Low	Continental Europe	23.1933	51.8837	5.03403	-3.56966	-6.80666	-45.9877	30.16	8.4656	-8.90489	-16.8695	-119.858	38.4362	15.0981	1.00501	1.0095	1.08072	-8.54086	-16.1527	-117.247	20.7054	11.9744	0.364028	0.716846	2.61111	-17.7309	-3.12366	evaporation
	P-O3HP-20210705_0808	2021-07-04 05:00:00	2021-07-04 11:00:00	Atlantic Low	North Atlantic	15.9946	92.3385	15.6614	-4.80982	-9.11268	-73.8745	12.122	-0.973126	-9.4385	-17.8353	-137.108	18.9222	5.57414	1.00535	1.01014	1.08917	-10.1091	-19.0633	-149.697	2.02912	2.80934	-0.670608	-1.22794	-12.5883	-16.8931	-2.7648	cloud
	P-O3HP-20210707_0802	2021-07-07 03:00:00	2021-07-07 04:00:00	Icelandic Low	Mediterranean / East Atlantic	18.409	79.966	0.559336	-1.23389	-2.35124	-17.4985	8.26382	1.31147	-6.85152	-12.958	-96.875	11.4244	6.78901	1.00524	1.00992	1.08623	-6.43626	-12.1518	-95.4959	-1.60829	1.71851	0.415261	0.806198	1.37908	-13.0327	-5.0705	evaporation
	P-O3HP-20210708_0835	2021-07-07 15:00:00	2021-07-07 17:00:00	Icelandic Low	East Atlantic	22.8944	63.2236	0.932227	-2.15649	-4.0931	-39.1537	6.77382	-6.40891	n.d.	n.d.	n.d.	n.d.	n.d.	1.00503	1.00953	1.08106	-7.14806	-13.4897	-111.197	-2.70612	-3.27955	n.d.	n.d.	n.d.	n.d.	n.d.	–
	P-O3HP-20210720_0845	2021-07-19 16:00:00	2021-07-19 17:00:00	Scandinavian Blocking	(no unique source)	19.9024	86.878	1.61722	-2.09014	-3.96379	-31.8001	4.70779	-0.0897822	-8.09876	-15.318	-113.834	19.0933	8.71016	1.00517	1.00979	1.08447	-7.21816	-13.6172	-107.213	-5.03131	1.72492	0.8806	1.70074	6.62072	-24.1246	-6.98524	evaporation
	P-O3HP-20210729_1627	2021-07-28 07:00:00	2021-07-28 09:00:00	NAO negative	Mediterranean	17.2772	79.2464	2.31234	-1.69941	-3.22557	-29.0376	4.99422	-3.23309	-8.02253	-15.1857	-110.664	25.0348	10.8219	1.00529	1.01002	1.0876	-6.95324	-13.1188	-107.24	-4.98055	-2.28969	1.0693	2.06696	3.42406	-30.0154	-13.1116	evaporation
	P-O3HP-20210802_1545	2021-07-30 23:00:00	2021-07-31	NAO negative	Mediterranean	19.7942	66.0128	0.18442	-0.625138	-1.17185	-18.5472	-6.23518	-9.17247	-7.27524	-13.7868	-101.896	28.2262	8.39887	1.00517	1.0098	1.0846	-5.76571	-10.8618	-95.0979	-15.9839	-8.20338	1.50953	2.92502	6.79791	-44.2101	-16.6023	evaporation
	P-O3HP-20210806_1130	2021-08-04 06:00:00	2021-08-04 15:00:00	Icelandic Low	East Atlantic	15.383	98.294	11.356	-4.55037	-8.64376	-61.3501	22.9907	7.79998	n.d.	n.d.	n.d.	n.d.	n.d.	1.00538	1.0102	1.08993	-9.88088	-18.655	-138.8	12.8409	10.4395	n.d.	n.d.	n.d.	n.d.	n.d.	–
	P-O3HP-20210826_0625	2021-08-24 13:00:00	2021-08-25 18:00:00	Scandinavian Blocking	Continental Europe	18.1569	77.2994	46.2385	-3.50241	-6.62515	-44.6447	1.15671	8.35653	n.d.	n.d.	n.d.	n.d.	n.d.	1.00525	1.00994	1.08653	-8.70488	-16.4061	-120.731	-8.73822	10.5173	n.d.	n.d.	n.d.	n.d.	n.d.	–
	P-O3HP-20210903_1030	2021-09-03 08:00:00	2021-09-03 09:00:00	NAO negative	Continental Europe / Northern Europe	19.2359	58.8256	3.16957	-1.45427	-2.72408	-22.8059	-15.0575	-1.01331	-8.55908	-16.1869	-114.925	20.7517	14.5705	1.0052	1.00985	1.08525	-6.6166	-12.4479	-99.5685	-24.8557	0.0145802	1.94248	3.739	15.3561	-45.6074	-14.5559	evaporation
	P-O3HP-20210907_1546	2021-09-03 16:00:00	2021-09-07 08:00:00	Atlantic Low / Scandinavian Blocking	Continental Europe	19.473	68.1051	1.86445	-2.21032	-4.20981	-27.3234	14.7038	6.35512	-8.13921	-15.4233	-107.366	34.4024	16.02	1.00519	1.00983	1.08497	-7.35768	-13.8984	-103.501	4.92673	7.68624	0.781527	1.52491	3.8655	-29.4757	-8.33376	evaporation
	P-O3HP-20210913_1000	2021-09-10 11:00:00	2021-09-10 12:00:00	NAO negative	Continental Europe	15.476	76.1223	1.11867	-0.120858	-0.222742	-14.8034	-3.24444	-13.0215	-6.55731	-12.4282	-96.913	24.3739	2.513	1.00538	1.01019	1.08982	-5.47052	-10.3104	-95.9977	-13.3856	-13.5146	1.08679	2.11785	0.915215	-37.7595	-16.0276	evaporation
	P-O3HP-20210915_1443	2021-09-14 08:00:00	2021-09-15 04:00:00	Atlantic Low	Mediterranean (East Atlantic)	17.4356	84.541	1.67801	-1.08368	-2.07514	-12.8983	12.5435	3.70276	-6.97232	-13.2127	-95.3381	26.0833	10.3638	1.00528	1.01001	1.0874	-6.33315	-11.9655	-92.2399	2.58316	3.48395	0.639165	1.24726	3.09823	-23.5002	-6.87983	evaporation
	P-O3HP-20210916_0733	2021-09-15 19:00:00	2021-09-16 06:00:00	Atlantic Low	Mediterranean	15.6437	96.374	21.0683	-3.31471	-6.3002	-40.3748	16.8168	10.0268	-7.2334	-13.6968	-100.354	22.4177	9.22061	1.00537	1.01018	1.08961	-8.63907	-16.3111	-119.292	6.69136	11.1966	-1.40567	-2.61434	-18.9387	-15.7263	1.97602	cloud
	P-O3HP-20210917_0750	2021-09-16 13:00:00	2021-09-16 14:00:00	Atlantic Low	Mediterranean	16.4961	92.3463	8.57649	-3.71096	-7.06196	-42.9579	24.0873	13.5378	-7.59685	-14.4082	-101.725	36.9781	13.5401	1.00533	1.0101	1.08855	-8.99176	-16.9875	-120.811	14.0409	15.0891	-1.39492	-2.57936	-19.0859	-22.9372	1.54906	cloud
	P-O3HP-20210920_0823	2021-09-19 01:00:00	2021-09-19 02:00:00	Scandinavian Blocking	North Atlantic / Continental Europe	12.9556	91.1638	6.52559	-4.12522	-7.83968	-47.5877	21.9067	15.1297	-9.58494	-18.1444	-127.681	37.1624	17.4749	1.00551	1.01043	1.09303	-9.57891	-18.0856	-128.651	11.5262	16.0343	0.00602836	0.0588152	-0.970028	-25.6362	-1.44055	evaporation
	P-O3HP-20210927_1520	2021-09-26 01:00:00	2021-09-26 10:00:00	NAO negative	Mediterranean / East Atlantic	12.7487	97.8386	25.9159	-2.67195	-5.07673	-32.3524	11.8089	8.26137	-8.32962	-15.7688	-109.971	27.862	16.1792	1.00552	1.01045	1.0933	-8.1441	-15.3709	-114.93	1.4083	8.03673	0.185517	0.397928	-4.95904	-26.4537	-8.14247	evaporation
	P-O3HP-20211006_0720	2021-10-03 19:00:00	2021-10-05 16:00:00	–	Mediterranean	13.488	99.5024	79.4257	-1.68151	-3.23461	-7.82413	27.7118	18.0527	-6.81261	-12.9506	-85.956	46.8014	17.649	1.00548	1.01038	1.09234	-7.12167	-13.4776	-91.6982	17.3824	16.1222	-0.309063	-0.526928	-5.74221	-29.419	-1.52678	cloud
	P-O3HP-20211022_0908	2021-10-21 04:00:00	2021-10-21 12:00:00	–	Mediterranean	12.213	97.753	5.59336	-2.22498	-4.27794	-13.757	36.1438	20.4665	-7.4899	-14.2328	-93.6712	50.8301	20.1915	1.00554	1.01051	1.094	-7.7269	-14.6317	-98.501	25.6911	18.5524	-0.237008	-0.398838	-4.82983	-25.139	-1.63912	cloud
	P-O3HP-20211105_0916	2021-10-30 04:00:00	2021-11-03 10:00:00	NAO positive	Mediterranean	10.9354	98.7925	63.205	-4.26257	-8.14118	-50.8856	44.4522	14.2439	n.d.	n.d.	n.d.	n.d.	n.d.	1.00561	1.01063	1.0957	-9.8191	-18.5781	-133.785	33.8739	14.8398	n.d.	n.d.	n.d.	n.d.	n.d.	–
	P-O3HP-20211112_1507	2021-11-10 13:00:00	2021-11-10 23:00:00	Scandinavian Blocking	Mediterranean	11.6319	90.34	4.1018	-2.70219	-5.16131	-31.2357	26.3795	10.0548	-8.07733	-15.267	-110.544	13.2888	11.5918	1.00558	1.01056	1.09477	-8.23134	-15.5619	-115.1	15.87	9.39539	-0.154007	-0.294908	-4.55571	2.58114	-2.19644	cloud
	P-O3HP-20211115	2021-11-14 15:00:00	2021-11-14 18:00:00	Scandinavian Blocking	Continental Europe	7.8034	98.6368	8.01715	-4.59509	-8.73456	-58.9189	26.4258	10.9576	-9.95135	-18.7934	-136.967	16.4197	13.38	1.00578	1.01096	1.10002	-10.3159	-19.4764	-144.487	15.5301	11.3239	-0.364557	-0.683001	-7.52002	-0.889599	-2.05601	cloud
	P-O3HP-20211116_1021	2021-11-15 11:00:00	2021-11-15 16:00:00	Scandinavian Blocking	Mediterranean	7.61059	95.5949	8.01715	-6.69971	-12.7224	-96.9099	38.2677	4.86923	-11.2611	-21.2607	-159.776	21.8164	10.3096	1.00579	1.01098	1.10029	-12.4189	-23.4406	-179.228	27.3522	8.29658	-1.1578	-2.17982	-19.4515	5.53576	-2.01299	cloud
	P-O3HP-20211125_1411	2021-11-24 20:00:00	2021-11-25 04:00:00	Atlantic Ridge	Mediterranean	6.38157	95.1975	1.1601	-7.42043	-14.0745	-102.654	36.0259	9.94149	-11.9543	-22.5826	-165.643	35.1201	15.0183	1.00586	1.01111	1.10205	-13.2026	-24.9033	-185.752	24.9818	13.4752	-1.24825	-2.32072	-20.1089	-10.1383	-1.54308	cloud
	P-O3HP_20211202_1248	2021-12-01 15:00:00	2021-12-01 19:00:00	Atlantic Ridge	North Atlantic	5.2909	99.2016	3.91535	-5.46066	-10.3856	-71.759	36.6595	11.326	-9.81269	-18.566	-137.763	34.0529	10.7658	1.00592	1.01122	1.10365	-11.3148	-21.3684	-158.932	25.4994	12.0152	-1.50214	-2.8024	-21.1698	-8.5535	1.24936	cloud
	P-O3HP_20211208_1305	2021-12-04	2021-12-08 11:00:00	Scandinavian Blocking	North Atlantic / Mediterranean	3.64247	96.0298	25.1701	-5.13477	-9.76057	-66.461	30.8944	11.6235	-10.9825	-20.7782	-152.736	43.6151	13.4895	1.00602	1.0114	1.10611	-11.0843	-20.9251	-156.014	19.5557	11.3867	-0.101783	-0.14695	-3.27835	-24.0594	-2.10275	cloud
	P-O3HP_20211210_1305	2021-12-08 16:00:00	2021-12-10 12:00:00	NAO positive	North Atlantic	2.34096	89.8383	0.372891	-9.47249	-17.9156	-136.352	27.539	6.97214	-13.6166	-25.6745	-194.083	23.2985	11.3128	1.00609	1.01155	1.1081	-15.471	-29.1279	-220.605	16.0564	12.4185	-1.85433	-3.45341	-26.5215	-7.24204	1.10574	cloud
		2021-12-10 11:00:00	2021-12-10 17:00:00	NAO negative	Mediterranean / East Atlantic	3.09898	81.9264	8.94938	-9.71481	-18.3512	-142.537	17.1596	4.27261	-12.7453	-24.0409	-181.057	22.1059	11.2696	1.00605	1.01146	1.10693	-15.668	-29.4769	-225.371	5.74101	10.4441	-2.92269	-5.43605	-44.3139	-16.3649	-0.825526	cloud
	P-O3HP-20220104_1200	2021-12-24	2021-12-29 02:00:00	–	–	7.03054	98.7691	49.9674	-5.54339	-10.5334	-73.1596	32.3419	11.1079	-10.3273	-19.5353	-144.132	37.1715	12.1501	1.00582	1.01104	1.10112	-11.3008	-21.3345	-158.275	21.3658	12.4012	-0.973537	-1.79923	-14.1427	-15.8057	0.25111	cloud
